# Supplementary material
Source: Research Square preprint supplement (doi:10.21203/rs.3.rs-9336410/v1)
Supplement: Supplementary file 1 [file 4dc9fa505a5730f18d22d070.docx]

| **Author** | **Title of the proyect** | **Year** | **Number of genes detected or analyzed** | **Type of microarray** |
| --- | --- | --- | --- | --- |
| Nashida, Tomoko *et al.* | Gene expression profiles of the three major salivary glands in rats | 2010 | Parotid gland: 6211 Submandibular gland: 7250 Sublingual glan: 7505 | Extraction of Total RNA |
| Pastore, A *et al*. | Genetic expression profiling of parotid neoplasms by cDNA microarrays | 2005 | Total of genes analized 19200 and 713 diferentially expresed | Extraction of Total  RNA |

**Table 1. Microarrays studies proyects**

**Table 2. Number of proteins found in saliva in each of the sources analyzed**

| **Source** | **Number of proteins detected** |
| --- | --- |
| Literature review | 162 |
| UniProt | 199 |
| The Human Protein Atlas | 1304 |
| String | 38 |
| Expasy-Prosite | 17 |
| Total | 1,720 |

| **Molecular weight** | **Number of proteins** |
| --- | --- |
| Very low weight <11 kDa | 219 |
| Low weight 11–50 kDa | 847 |
| Medium weight 51–100 kDa | 464 |
| High wieight >100 kDa | 190 |
| Total | 1,720 |

**Table 3. Classification of total salivary proteins in the database by molecular weight**

| **Author** | **Study title** | **Year** | **Expresed genes** | **Analyzed genes** |
| --- | --- | --- | --- | --- |
| Chen, M. *Et al.* | Transcriptomic Mapping of Human Parotid Gland at Single-Cell Resolution. | 2022 | 30766 | 31808 |
| [Ying-Qian, M. *Et al.*](https://pubmed.ncbi.nlm.nih.gov/?term=Mo+YQ&cauthor_id=35113815) | Lysosomal exocytosis of HSP70 stimulates monocytic BMP6 expression in Sjögren’s syndrome | 2022 | 19277 | Not defined |
| Horeth, E. *Et al.* | [High Resolution Transcriptomic Landscape of the Human Submandibular Gland](https://pubmed.ncbi.nlm.nih.gov/36726292/) | 2023 | Adults 20531 Newborn 22906 | Major salivary glands 24246 |
| Chan, L. *Et al.* | Single-cell clonal tracing of glandular and circulating T cells identifies a population of CD9+ CD8+ T cells in primary Sjogren’s syndrome | 2024 | 29626 | Not defined |

**Table 4. Transcriptome analysis reported including single cell works.**

**Table 5. Proteins are shared by saliva and blood serum.**

| 1. Agouti signaling protein |
| --- |
| 1. Alpha 2 macroglobulin |
| 1. Aminopeptidase N |
| 1. Angiopoietin 4 |
| 1. Annexin A1 |
| 1. Apolipoprotein A-I |
| 1. Apolipoprotein C4 |
| 1. b 2-microglobulin |
| 1. Bone morphogenetic protein 7 |
| 1. Carbonic anhydrase 1 |
| 1. Carbonic anhydrase 2 |
| 1. Catalase |
| 1. Cathelicidin antimicrobial peptide |
| 1. Cathepsin B |
| 1. Cathepsin D |
| 1. Cathepsin L |
| 1. C-C motif chemokine ligand 19 |
| 1. CD14 molecule |
| 1. CD44 molecule (Indian blood group) |
| 1. CD55 molecule (Cromer blood group) |
| 1. Ceruloplasmin |
| 1. Chorionic somatomammotropin hormone 1 |
| 1. Chorionic somatomammotropin hormone 2 |
| 1. Chorionic somatomammotropin hormone like 1 |
| 1. Chromosome 4 open reading frame 48 |
| 1. Clusterin |
| 1. Coagulation factor II, thrombin |
| 1. Complement C3 |
| 1. Complement component 4 binding protein beta |
| 1. C-type lectin domain family 18 member A |
| 1. C-type lectin domain family 18 member B |
| 1. C-type lectin domain family 18 member C |
| 1. Cystatin C |
| 1. Dipeptidyl peptidase 4 |
| 1. Endothelin 1 |
| 1. Epidermal growth factor receptor |
| 1. FAM3 metabolism regulating signaling molecule B |
| 1. Fibrinogen beta chain |
| 1. Fibronectin |
| 1. Fms related receptor tyrosine kinase 1 |
| 1. Gelsolin |
| 1. Growth hormone 1 |
| 1. Growth hormone 2 |
| 1. Haptoglobin |
| 1. Heparin binding EGF like growth factor |
| 1. Hepatocyte growth factor |
| 1. Inter-alpha-trypsin inhibitor heavy chain 3 |
| 1. Interferon gamma |
| 1. Interferon lambda 2 |
| 1. Interleukin 20 |
| 1. Interleukin 25 |
| 1. Interleukin 32 |
| 1. Interleukin 1 receptor associated kinase 3 |
| 1. Interleukin 15 receptor subunit alpha |
| 1. ISG15 ubiquitin like modifier |
| 1. Lactoferrin (lactotransferrin) |
| 1. Leucine-rich α2-glycoprotein |
| 1. Lysozyme |
| 1. Midkine |
| 1. Mitogen-activated protein kinase kinase kinase 3 |
| 1. Myeloperoxidase |
| 1. Nucleobindin 1 |
| 1. Nucleobindin 2 |
| 1. Paraoxonase 2 |
| 1. Phospholipase A2 receptor 1 |
| 1. Plasminogen |
| 1. Plasminogen activator, tissue type |
| 1. Platelet derived growth factor subunit A |
| 1. Platelet-derived growth factor C |
| 1. Protein disulfide isomerase |
| 1. Resistin |
| 1. Secretory leukocyte peptidase inhibitor |
| 1. Semaphorin-3G |
| 1. Serglycin |
| 1. Serotransferrin |
| 1. Signal transducer and activator of transcription 5B |
| 1. Solute carrier family 22 member 1 |
| 1. Tachykinin precursor 1 |
| 1. Thrombospondin-1 |
| 1. TIMP metallopeptidase inhibitor 1 |
| 1. Transferrin |
| 1. Transforming growth factor beta 2 |
| 1. Transforming growth factor beta 3 |
| 1. Transthyretin |
| 1. Trefoil factor 3 |
| 1. Tumor necrosis factor |
| 1. Vascular cell adhesion molecule 1 |
| 1. Vitronectin |
| 1. Zinc-a-2glycoprotein |
| 1. α fetoprotein |
| 1. α2-HS-glycoprotein |

**Table legends**

**Table 1. Microarrays studies**

**Table 1**. It shows the projects related to the expression of genes detected using the microarray tool, where we can observe the thousands of genes analyzed and the methodology used, which was the same in both cases: extraction of total RNA from different salivary glands.

**Table 2. Number of proteins found in saliva in each of the sources analyzed.**

**Table 2**. It shows, in detail, each source from which the proteins were obtained and the number obtained from each, highlighting that the Human Protein Atlas, literature review, and UniProt provided the most data.

**Table 3. Classification of total salivary proteins in the database by molecular weight.**

**Table 3**. This table shows the molecular weight of 1,720 proteins obtained by comparing all proteins found in saliva. We observed that most proteins weighed between 11 kDa and 100 kDa, representing 76.21%.

**Table 4. Transcriptome analysis reported, including single-cell works.**

**Table 4.** This table shows transcriptome studies developed to detect genes expressed in the salivary glands; as we can see, there are multiple works with different numbers of analyzed genes.

**Table 5. Proteins are shared by saliva and blood serum.**

**Table 5.** shows the names of the 91 proteins obtained after comparing the saliva and serum databases. We identified 91 proteins with multiple functions and involved in diverse processes in the saliva and serum.
