# Supplementary material
Source: Research Square preprint supplement (doi:10.21203/rs.3.rs-9336410/v1)
Supplement: Supplementary file 1 [file 33a7d05142a19356cd329334.xlsx]

## Sheet: Hoja1
REFERENCE	PROTEINS	FUNCTION	MOLECULAR WEIGTH	PI	TYPE OF FUNCTION
PMID: 34485814 DOI: 10.1093/jncics/pkab066	CA 15-3	Circulating levels of cancer antigen (CA) 15–3, a tumor marker and regulator of cellular metabolism, were reduced by metformin in a nonrandomized neoadjuvant study.	595.57	5.91	ADHESION
THE HUMAN PROTEIN ATLAS	Maestro heat like repeat family member 8	The protein encoded by this gene belongs to the maestro heat-like repeat family. The exact function of this gene is not known, however, in a genome-wide association study using hippocampal atrophy as a quantitative trait, this gene has been associated with Alzheimer's disease (PMID:19668339). Alternatively spliced transcript variants encoding different isoforms have been found for this gene. [pro…	679.84	9,52	BIOMARKER
PMID: 24495360 DOI: 10.1186/1476-9255-11-4	Histatin 3	Histatins 3 and 5 are the heat shock protein-binding proteins that are most abundant in saliva and are active against Candida albicans and Porphyromonas gingivalis. In addition, histatins 3 and 5 are also involved in the proliferation of human gingival fibroblasts and rabbit costal chondrocytes, respectively	855.95	6.74	ANTIMICROBIAL
THE HUMAN PROTEIN ATLAS	Epidermal growth factor receptor	Receptor tyrosine kinase binding ligands of the EGF family and activating several signaling cascades to convert extracellular cues into appropriate cellular responses. Known ligands include EGF, TGFA/TGF-alpha, AREG, epigen/EPGN, BTC/betacellulin, epiregulin/EREG and HBEGF/heparin-binding EGF. Ligand binding triggers receptor homo- and/or heterodimerization and autophosphorylation on key cytoplas…	1020.23	5.99	ACTIVATOR
PMID: 21787339 DOI: 10.1042/BST0391012	PLUNC (palate lung nasal epithelial clone)	Plays a role in the innate immune responses of the upper airways. Reduces the surface tension in secretions from airway epithelia and inhibits the formation of biofilm by pathogenic Gram-negative bacteria, such as P.aeruginosa and K.pneumoniae. Binds bacterial lipopolysaccharide (LPS).	1308.93	8.25	ADHESION
PMID: 30028540 DOI: 10.1111/jop.12767	CEA	Carcinoembryonic antigen is currently the most well-known biomarker for the detection of epithelial neoplasms. As a broad-spectrum tumor marker, CEA is commonly used for the diagnosis and treatment of oral squamous cell carcinoma	1323.52	3.57	BIOMARKER
THE HUMAN PROTEIN ATLAS	SLC17A5	Mfs transporter, acs family, solute carrier family 17 (sodium-dependent inorganic phosphate cotransporter), member 5; Sialin; Transports glucuronic acid and free sialic acid out of the lysosome after it is cleaved from sialoglycoconjugates undergoing degradation, this is required for normal CNS myelination. Mediates aspartate and glutamate membrane potential- dependent uptake into synaptic vesicl…	1394.65	3.67	CARRIER
THE HUMAN PROTEIN ATLAS	Osteonectin	Appears to regulate cell growth through interactions with the extracellular matrix and cytokines. Binds calcium and copper, several types of collagen, albumin, thrombospondin, PDGF and cell membranes.	1606.95	3.67	OSTEOGENESIS
THE HUMAN PROTEIN ATLAS	Mucin-17	Probably plays a role in maintaining homeostasis on mucosal surfaces	1631.82	3.67	INFLAMMATORY
PMID: 26879019 DOI: 10.4103/0366-6999.176084	b 2-microglobulin	Beta 2 microglobulin (β2M) is a small protein (11,800 Dalton), presenting in nearly all nucleated cells and most biological fluids, including serum, urine, and synovial fluid.[1,2] No genetic variant of β2M is known in human.	1886.28	8.25	IMMUNOLOGICAL
PMID: 34411303 DOI: 10.1002/eji.202149383	Poly-Ig receptor (IgA secretory chain)	transcites J-chain-containing antibodies through mucosal epithelia.	1908.25	6.52	IMMUNOLOGICAL
PMID: 31895503 DOI: 10.17219/dmp/110453	Carbonic anydrase VI	it is considered to be heavily involved in saliva buffering, ion transport, pH regulation, secretory processes, and saliva production.	1937.68	6.06	ENZYME
PMID: 11023262 DOI: 10.1177/00220345000790090601	Defensin-1	The aim is to protect the salivary glands against retrograde infection, that the expression of the peptide increases in inflamed sites, and that post-transcriptional regulation mechanisms may be involved in the expression of the hBD-1 peptide.	1969.13	3.39	ANTIMICROBIAL
THE HUMAN PROTEIN ATLAS	Pre-mRNA processing factor 38B	May be required for pre-mRNA splicing.	2984.97	9.12	CELL FUNCTION REGULATOR
THE HUMAN PROTEIN ATLAS	LIF receptor subunit alpha	Signal-transducing molecule. May have a common pathway with IL6ST. The soluble form inhibits the biological activity of LIF by blocking its binding to receptors on target cells.	3042.47	4,87	SIGNAL
THE HUMAN PROTEIN ATLAS	Basic helix-loop-helix ARNT like 1	Transcriptional activator which forms a core component of the circadian clock. The circadian clock, an internal time-keeping system, regulates various physiological processes through the generation of approximately 24 hour circadian rhythms in gene expression, which are translated into rhythms in metabolism and behavior. It is derived from the Latin roots 'circa' (about) and 'diem' (day) and acts…	3108.45	4.9	ACTIVATOR
PROSITE	Defensin HNP-3, chain A	Mammalian defensins	3492.1	8.33	ANTIMICROBIAL
PMID: 30232708 DOI: 10.1007/s12325-018-0789-7	Carbonic anhydrase 6	Reversible hydration of carbon dioxide. Its role in saliva is unknown; Carbonic anhydrases	3678.13	5.63	ENZYME
PMID: 21204015 DOI: 10.1007/s13238-010-0113-z	Catalase	Catalases are well-studied enzymes that play a critical role in protecting cells against the toxic effects of hydrogen peroxide.	3996.55	4.41	METABOLIC
PMID: 29209994 DOI: 10.1007/s12325-017-0648-y	Trypsin	Provides better resolution of inflammatory symptoms and promotes faster recovery from acute tissue injury than several of the other existing enzyme preparations	4166.74	6.44	ENZYME
THE HUMAN PROTEIN ATLAS	Transferrin	Transferrins are iron binding transport proteins which can bind two Fe(3+) ions in association with the binding of an anion, usually bicarbonate. It is responsible for the transport of iron from sites of absorption and heme degradation to those of storage and utilization. Serum transferrin may also have a further role in stimulating cell proliferation	4385.28	4.83	CARRIER
THE HUMAN PROTEIN ATLAS	Cathepsin B	Thiol protease which is believed to participate in intracellular degradation and turnover of proteins. Has also been implicated in tumor invasion and metastasis	4638.27	4.98	BIOMARKER
THE HUMAN PROTEIN ATLAS	Patatin like phospholipase domain containing 3	Specifically catalyzes coenzyme A (CoA)-dependent acylation of 1-acyl-sn-glycerol 3-phosphate (2-lysophosphatidic acid/LPA) to generate phosphatidic acid (PA), an important metabolic intermediate and precursor for both triglycerides and glycerophospholipids. Does not esterify other lysophospholipids. Acyl donors are long chain (at least C16) fatty acyl-CoAs: arachidonoyl-CoA, linoleoyl-CoA, oleoy…	4731.51	5.28	ENZYME
THE HUMAN PROTEIN ATLAS	Aquaporin-5	Forms a water-specific channel. Implicated in the generation of saliva, tears, and pulmonary secretions. Required for TRPV4 activation by hypotonicity. Together with TRPV4, controls regulatory volume decrease in salivary epithelial cells	4779.28	6.81	CARRIER
THE HUMAN PROTEIN ATLAS	Mitochondrial ribosomal protein L21	Ribonucleoprotein, Ribosomal protein	5009.65	11.54	ENZYME
PMID: 28097158 DOI: 10.1155/2016/7675437	Osteopontin	Osteopontin (OPN) regulates the immune response at multiple levels. Physiologically, it regulates the host response to infections by driving T helper (Th) polarization and acting on both innate and adaptive immunity; pathologically, it contributes to the development of immune-mediated and inflammatory diseases.	5193.85	11.15	METABOLIC
PMID: 29846436 DOI: 10.1590/1414-431x20187138	Cofilin-1	Cofilin-1 (CFL1), a small protein of 18 kDa, has been studied as a biomarker due to its involvement in tumor cell migration and invasion. Our aim was to evaluate CFL1 as an indicator of malignancy and aggressiveness in sputum samples.	5296.04	4.64	MOTOR
UNIPROT	Tissue kallikrein precursor	Participates in various redox reactions through the reversible oxidation of its active center dithiol to a disulfide and catalyzes dithiol-disulfide exchange reactions. Plays a role in the reversible S-nitrosylation of cysteine residues in target proteins, and thereby contributes to the response to intracellular nitric oxide. Nitrosylates the active site Cys of CASP3 in response to nitric oxide (…	5306.12	5.96	IMMUNOLOGICAL
PMID: 28189726 DOI: 10.1016/j.bcp.2017.02.001 PMID: 15857090 DOI: 10.1902/jop.2005.76.4.513	Osteocalcin	It acts as a hormone by stimulating insulin production and increasing energy expenditure and insulin sensitivity in target organs. Since osteocalcin can play an important role in cementogenesis, osteoblast differentiation, and osteomineralization, it can express hard tissue metabolism.	5322.25	4.14	METABOLIC
PMID: 33137905 DOI: 10.3390/ijms21218057	Myeloperoxidase	The heme protein myeloperoxidase (MPO) is a major constituent of neutrophils. As a key mediator of the innate immune system, neutrophils are rapidly recruited to inflammatory sites, where they recognize, phagocytose, and inactivate foreign microorganisms.	5436.14	3.99	ANTIMICROBIAL
UNIPROT	ATP binding cassette subfamily C member 8	Subunit of the beta-cell ATP-sensitive potassium channel (KATP). Regulator of ATP-sensitive K+ channels and insulin release.	5468.39	5.2	CARRIER
THE HUMAN PROTEIN ATLAS	Paraoxonase 2	Capable of hydrolyzing lactones and a number of aromatic carboxylic acid esters. Has antioxidant activity. Is not associated with high density lipoprotein. Prevents LDL lipid peroxidation, reverses the oxidation of mildly oxidized LDL, and inhibits the ability of MM-LDL to induce monocyte chemotaxis	5471.65	10.03	ENZYME
THE HUMAN PROTEIN ATLAS	Ethanolamine-phosphate phospho-lyase	Catalyzes the pyridoxal-phosphate-dependent breakdown of phosphoethanolamine, converting it to ammonia, inorganic phosphate and acetaldehyde.	5480.3	9.51	ENZYME
THE HUMAN PROTEIN ATLAS	Ectonucleotide pyrophosphatase/phosphodiesterase 3	Hydrolase that metabolizes extracellular nucleotides, including ATP, GTP, UTP and CTP	5605.44	8.74	METABOLIC
THE HUMAN PROTEIN ATLAS	Solute carrier family 7 member 6	Heterodimer with SLC3A2, that functions as an antiporter which operates as an efflux route by exporting cationic amino acids such as L-arginine from inside the cells in exchange with neutral amino acids like L-leucine, L-glutamine and isoleucine, plus sodium ions and may participate in nitric oxide synthesis 1, 2, 3, 4, 5, 6, 7, 8, 9. Also exchanges L-arginine with L-lysine in a sodium-independen…	5616.85	8.48	CARRIER
THE HUMAN PROTEIN ATLAS	Sterile alpha motif domain containing 13	Predicted to enable chromatin binding activity and histone binding activity. Predicted to be involved in negative regulation of transcription, DNA-templated. Predicted to be active in nucleus.	5785.5	4.4	CELL FUNCTION REGULATOR
THE HUMAN PROTEIN ATLAS	TRAF3 interacting protein 1	Plays an inhibitory role on IL13 signaling by binding to IL13RA1. Involved in suppression of IL13-induced STAT6 phosphorylation, transcriptional activity and DNA-binding. Recruits TRAF3 and DISC1 to the microtubules. Involved in kidney development and epithelial morphogenesis. Involved in the regulation of microtubule cytoskeleton organization. Is a negative regulator of microtubule stability, ac…	5810.77	10,39	INHIBITOR
PMID: 34970276 DOI: 10.3389/fimmu.2021.803244	Alpha 2 macroglobulin	Alpha-2-macroglobulin is an extracellular macromolecule mainly known for its role as a broad-spectrum protease inhibitor. By presenting itself as an optimal substrate for endopeptidases of all catalytic types, alpha-2-macroglobulin lures active proteases into its molecular cage and subsequently 'flags' their complex for elimination.	5897.26	3.8	INHIBITOR
THE HUMAN PROTEIN ATLAS	ST8 alpha-N-acetyl-neuraminide alpha-2,8-sialyltransferase 5	Involved in the synthesis of gangliosides GD1c, GT1a, GQ1b, GP1c and GT3 from GD1a, GT1b, GM1b and GD3 respectively.	5911.87	5.97	METABOLIC
THE HUMAN PROTEIN ATLAS	Single-pass membrane protein with coiled-coil domains 4	Predicted to be integral component of membrane.	5939.21	10.29	STRUCTURAL
THE HUMAN PROTEIN ATLAS	SPARC like 1	Appears to regulate cell growth through interactions with the extracellular matrix and cytokines. Binds calcium and copper, several types of collagen, albumin, thrombospondin, PDGF and cell membranes. There are two calcium binding sites; an acidic domain that binds 5 to 8 Ca2+ with a low affinity and an EF-hand loop that binds a Ca2+ ion with a high affinity.	5956.74	4.84	STRUCTURAL
PMID: 29607540 DOI: 10.1111/jpi.12493	Intercellular adhesion molecule 4, Landsteiner–Wiener blood group protein	ICAM-4 is the first ICAM family member shown to be a ligand for integrins other than those of the beta(2) family, and the data suggest that ICAM-4 has a novel integrin-binding site(s). These findings suggest a role for ICAM-4 in normal erythropoiesis and may also be relevant to the adhesive interactions of sickle cells.	5992.1	11.01	ADHESION
THE HUMAN PROTEIN ATLAS	Phorbol-12-myristate-13-acetate-induced protein 1	Promotes activation of caspases and apoptosis. Promotes mitochondrial membrane changes and efflux of apoptogenic proteins from the mitochondria. Contributes to p53/TP53-dependent apoptosis after radiation exposure. Promotes proteasomal degradation of MCL1. Competes with BAK1 for binding to MCL1 and can displace BAK1 from its binding site on MCL1 (By similarity). Competes with BIM/BCL2L11 for bind…	6030.08	10.3	ACTIVATOR
THE HUMAN PROTEIN ATLAS	Glucosamine (UDP-N-acetyl)-2-epimerase/N-acetylmannosamine kinase	Bifunctional enzyme that possesses both UDP-N-acetylglucosamine 2-epimerase and N-acetylmannosamine kinase activities, and serves as the initiator of the biosynthetic pathway leading to the production of N-acetylneuraminic acid (NeuAc), a critical precursor in the synthesis of sialic acids. By catalyzing this pivotal and rate-limiting step in sialic acid biosynthesis, this enzyme assumes a pivota…	6043.87	7,91	ENZYME
THE HUMAN PROTEIN ATLAS	Kinesin family member 13B	Involved in reorganization of the cortical cytoskeleton. Regulates axon formation by promoting the formation of extra axons.	6060.05	10.59	CELLULAR ORGANIZATION
THE HUMAN PROTEIN ATLAS	Potassium calcium-activated channel subfamily N member 4	Forms a voltage-independent potassium channel that is activated by intracellular calcium 1. Activation is followed by membrane hyperpolarization which promotes calcium influx. Required for maximal calcium influx and proliferation during the reactivation of naive T-cells 2, 3. Plays a role in the late stages of EGF-induced macropinocytosis	6095.26	9.3	CARRIER
THE HUMAN PROTEIN ATLAS	TMEM9 domain family member B	Enhances production of pro-inflammatory cytokines induced by TNF, IL1B, and TLR ligands. Has a role in TNF activation of both the NF-kappaB and MAPK pathways.	6111.38	5,11	INFLAMMATORY
THE HUMAN PROTEIN ATLAS	Bestrophin 1	Forms calcium-sensitive chloride channels. Highly permeable to bicarbonate.	6131.16	10.9	CARRIER
THE HUMAN PROTEIN ATLAS	Acyl-CoA synthetase bubblegum family member 1	Catalyzes the conversion of fatty acids such as long-chain and very long-chain fatty acids to their active form acyl-CoAs for both synthesis of cellular lipids, and degradation via beta-oxidation	6137.91	6.7	METABOLIC
THE HUMAN PROTEIN ATLAS	Ribosomal protein L39 like	Male germ cell-specific component of the ribosome, which is required for the formation of sperm and male fertility. Replaces the RPL39 paralog in the ribosome of male germ cells. The ribosome is a large ribonucleoprotein complex responsible for the synthesis of proteins in the cell. The male germ cell-specific ribosome displays a ribosomal polypeptide exit tunnel of distinct size and charge state…	6292.52	12.41	CELL FUNCTION REGULATOR
THE HUMAN PROTEIN ATLAS	Elongation factor like GTPase 1	Involved in the biogenesis of the 60S ribosomal subunit and translational activation of ribosomes.	6295.42	9.69	ACTIVATOR
THE HUMAN PROTEIN ATLAS	COP9 signalosome subunit 5	Probable protease subunit of the COP9 signalosome complex (CSN), a complex involved in various cellular and developmental processes.	6299.06	5.14	CELL FUNCTION REGULATOR
THE HUMAN PROTEIN ATLAS	RAD23 homolog B, nucleotide excision repair protein	Multiubiquitin chain receptor involved in modulation of proteasomal degradation. Binds to polyubiquitin chains. Proposed to be capable to bind simultaneously to the 26S proteasome and to polyubiquitinated substrates and to deliver ubiquitinated proteins to the proteasome. May play a role in endoplasmic reticulum-associated degradation (ERAD) of misfolded glycoproteins by association with PNGase a…	6307.08	9.57	RECEPTOR
THE HUMAN PROTEIN ATLAS	Heat shock protein family A (Hsp70) member 12A	Adapter protein for SORL1, but not SORT1. Delays SORL1 internalization and affects SORL1 subcellular localization.	6352.29	9.27	ENZYME
THE HUMAN PROTEIN ATLAS	Ribosomal protein L39	RNA-binding component of the large ribosomal subunit. The ribosome is a large ribonucleoprotein complex responsible for the synthesis of proteins in the cell.	6406.68	12.55	CATALYTIC ACTIVITY
THE HUMAN PROTEIN ATLAS	Serine and arginine rich splicing factor 7	Required for pre-mRNA splicing. Can also modulate alternative splicing in vitro. Represses the splicing of MAPT/Tau exon 10. May function as export adapter involved in mRNA nuclear export such as of histone H2A. Binds mRNA which is thought to be transferred to the NXF1-NXT1 heterodimer for export (TAP/NXF1 pathway); enhances NXF1-NXT1 RNA-binding activity. RNA-binding is semi-sequence specific	6414.18	10.75	TRANSCRIPTION
THE HUMAN PROTEIN ATLAS	Zinc finger and BTB domain containing 8 opposite strand	Component of the tRNA-splicing ligase complex required to facilitate the enzymatic turnover of catalytic subunit RTCB. Together with DDX1, acts by facilitating the guanylylation of RTCB, a key intermediate step in tRNA ligation.	6416.32	5.25	ADHESION
THE HUMAN PROTEIN ATLAS	SMG7 nonsense mediated mRNA decay factor	Plays a role in nonsense-mediated mRNA decay. Recruits UPF1 to cytoplasmic mRNA decay bodies. Together with SMG5 is thought to provide a link to the mRNA degradation machinery involving exonucleolytic pathways, and to serve as an adapter for UPF1 to protein phosphatase 2A (PP2A), thereby triggering UPF1 dephosphorylation.	6437.43	8.16	METABOLIC
THE HUMAN PROTEIN ATLAS	Transmembrane protein 18	Transcription repressor. Sequence-specific ssDNA and dsDNA binding protein, with preference for GCT end CTG repeats. Cell migration modulator which enhances the glioma-specific migration ability of neural stem cells (NSC) and neural precursor cells (NPC).	6454.53	9,20	ADHESION
UNIPROT	Myosin α heavy chain, cardiac muscle	The alpha-myosin heavy chain (alpha-MHC) gene encodes a cardiac muscle-specific protein involved in active force generation.	6536.54	8.98	CELLULAR ORGANIZATION
THE HUMAN PROTEIN ATLAS	ATP synthase inhibitory factor subunit 1	Endogenous F(1)F(o)-ATPase inhibitor limiting ATP depletion when the mitochondrial membrane potential falls below a threshold and the F(1)F(o)-ATP synthase starts hydrolyzing ATP to pump protons out of the mitochondrial matrix. Required to avoid the consumption of cellular ATP when the F(1)F(o)-ATP synthase enzyme acts as an ATP hydrolase.	6592.31	8.34	CELL FUNCTION REGULATOR
THE HUMAN PROTEIN ATLAS	Tau tubulin kinase 1	Serine/threonine kinase which is able to phosphorylate TAU on serine, threonine and tyrosine residues. Induces aggregation of TAU	6625.57	10.38	CELL FUNCTION REGULATOR
UNIPROT	Tau tubulin kinase 1	Serine/threonine kinase which is able to phosphorylate TAU on serine, threonine and tyrosine residues. Induces aggregation of TAU	6625.57	10.38	ENZYME
THE HUMAN PROTEIN ATLAS	Synaptotagmin like 2	Isoform 1 acts as a RAB27A effector protein and plays a role in cytotoxic granule exocytosis in lymphocytes. It is required for cytotoxic granule docking at the immunologic synapse. Isoform 4 binds phosphatidylserine (PS) and phosphatidylinositol-4,5-bisphosphate (PIP2) and promotes the recruitment of glucagon-containing granules to the cell membrane in pancreatic alpha cells. Binding to PS is in…	6640.16	5	ACTIVATOR
THE HUMAN PROTEIN ATLAS	ATP synthase membrane subunit 6.8PL	Mitochondrial membrane ATP synthase (F(1)F(0) ATP synthase or Complex V) produces ATP from ADP in the presence of a proton gradient across the membrane which is generated by electron transport complexes of the respiratory chain.	6662.04	10.08	CELL FUNCTION REGULATOR
THE HUMAN PROTEIN ATLAS	ATP synthase membrane subunit j	Mitochondrial membrane ATP synthase (F(1)F(0) ATP synthase or Complex V) produces ATP from ADP in the presence of a proton gradient across the membrane which is generated by electron transport complexes of the respiratory chain. F-type ATPases consist of two structural domains, F(1) - containing the extramembraneous catalytic core and F(0) - containing the membrane proton channel, linked together…	6662.04	10.08	METABOLIC
THE HUMAN PROTEIN ATLAS	Adaptor related protein complex 5 subunit sigma 1	As part of AP-5, a probable fifth adaptor protein complex it may be involved in endosomal transport. According to 1, it is required for efficient homologous recombination DNA double-strand break repair	6671.68	7.87	CARRIER
PMID: 31572555 DOI: 10.3892/etm.2019.7922	Fructose-bisphosphate aldolase	Catalyzes the reversible conversion of beta-D-fructose 1,6-bisphosphate (FBP) into two triose phosphate and plays a key role in glycolysis and gluconeogenesis	6701.77	5	ENZYME
THE HUMAN PROTEIN ATLAS	Protein tyrosine phosphatase non-receptor type 20	Tyrosine-protein phosphatase targeted to sites of actin polymerization in response of varied extracellular stimuli. Has tyrosine phosphatase activity towards various tyrosyl phosphorylated substrates.	6736.45	5.62	CELL FUNCTION REGULATOR
THE HUMAN PROTEIN ATLAS	Protamine 1	Protamines substitute for histones in the chromatin of sperm during the haploid phase of spermatogenesis. They compact sperm DNA into a highly condensed, stable and inactive complex	6822.99	12.08	CELL CYCLE
THE HUMAN PROTEIN ATLAS	PR/SET domain 2	S-adenosyl-L-methionine-dependent histone methyltransferase that specifically methylates 'Lys-9' of histone H3. May function as a DNA-binding transcription factor. Binds to the macrophage-specific TPA-responsive element (MTE) of the HMOX1 (heme oxygenase 1) gene and may act as a transcriptional activator of this gene.	6841.54	11.21	TRANSCRIPTION
THE HUMAN PROTEIN ATLAS	Microtubule associated protein 1 light chain 3 beta	Ubiquitin-like modifier involved in formation of autophagosomal vacuoles (autophagosomes) 1, 2, 3. Plays a role in mitophagy which contributes to regulate mitochondrial quantity and quality by eliminating the mitochondria to a basal level to fulfill cellular energy requirements and preventing excess ROS production 4, 5. In response to cellular stress and upon mitochondria fission, binds C-18 cera…	6867.67	11,33	CELL FUNCTION REGULATOR
THE HUMAN PROTEIN ATLAS	Cytochrome c oxidase copper chaperone COX17	Copper metallochaperone essential for the assembly of the mitochondrial respiratory chain complex IV (CIV), also known as cytochrome c oxidase. Binds two copper ions and delivers them to the metallochaperone SCO1 which transports the copper ions to the Cu(A) site on the cytochrome c oxidase subunit II (MT-CO2/COX2	6915.1	6.8	CELLULAR ORGANIZATION
THE HUMAN PROTEIN ATLAS	Pleckstrin homology domain containing A3	Plays a role in regulation of vesicular cargo transport from the trans-Golgi network (TGN) to the plasma membrane 1. Regulates Golgi phosphatidylinositol 4-phosphate (PtdIns(4)P) levels and activates the PtdIns(4)P phosphatase activity of SACM1L when it binds PtdIns(4)P in 'trans' configuration 2. Binds preferentially to PtdIns(4)P 3, 4. Negatively regulates APOB secretion from hepatocytes	6934.81	4.99	CELLULAR ORGANIZATION
STRING	Alpha-2-glycoprotein 1, zinc-binding	It stimulates the degradation of lipids in adipocytes and causes the large fat losses associated with some advanced cancers. It can bind to polyunsaturated fatty acids.	6937.05	3.69	ENZYME
THE HUMAN PROTEIN ATLAS	Endosome-lysosome associated apoptosis and autophagy regulator 1	(UniProt)i May protect cells from cell death by inducing cytosolic vacuolization and up-regulating the autophagy pathway. May play a role in apoptosis and cell proliferation through its interaction with HSPA5	6956.98	11.25	CELL DEATH
PMID: 28751526 DOI: 10.1096/fj.201700085R UNIPROT	Histatin 1	Histatin-1 is a highly enriched 38 aa antimicrobial peptide in human saliva that has been previously reported to promote the migration of keratinocytes and oral fibroblasts in vitro. Histatins are salivary proteins that are considered to be major precursors of the protective proteinaceous structure on tooth surfaces (enamel pellicle). In addition, histatins exhibit antibacterial and antifungal ac…	6962.91	9.10	ANTIMICROBIAL
UNIPROT	Histatin 1 precursor	Histatins are salivary proteins that are considered to be major precursors of the protective proteinaceous structure on tooth surfaces (enamel pellicle). In addition, histatins exhibit antibacterial and antifungal activities.	6962.91	9.1	IMMUNOLOGICAL
THE HUMAN PROTEIN ATLAS	Semaphorin 3C	Binds to plexin family members and plays an important role in the regulation of developmental processes. Required for normal cardiovascular development during embryogenesis. Functions as attractant for growing axons, and thereby plays an important role in axon growth and axon guidance	6992.38	8.85	CELL CYCLE
THE HUMAN PROTEIN ATLAS	OCIA domain containing 2	Predicted to be involved in endocytosis; hematopoietic stem cell homeostasis; and positive regulation of receptor signaling pathway via JAK-STAT. Predicted to act upstream of or within response to bacterium. Predicted to be located in Golgi apparatus; endosome; and lysosome.	6997.04	9.3	CELL FUNCTION REGULATOR
THE HUMAN PROTEIN ATLAS	Miembro 3 de la familia relacionada con la cadherina Cadherin related family member 3	Cadherins are calcium-dependent cell adhesion proteins.	7007.73	4.05	RECEPTOR
THE HUMAN PROTEIN ATLAS	CLN6 transmembrane ER protein	The genes responsible likely encode proteins involved in the degradation of post-translationally modified proteins in lysosomes.	7104.25	10.91	ENZYME
THE HUMAN PROTEIN ATLAS	Membrane spanning 4-domains A13	May be involved in signal transduction as a component of a multimeric receptor complex	7106.26	5.57	CELL FUNCTION REGULATOR
THE HUMAN PROTEIN ATLAS	Methyltransferase like 9	Protein-histidine N-methyltransferase that specifically catalyzes 1-methylhistidine (pros-methylhistidine) methylation of target proteins 1, 2. Mediates methylation of proteins with a His-x-His (HxH) motif (where 'x' is preferably a small amino acid) 3. Catalyzes methylation of target proteins such as S100A9, NDUFB3, SLC39A5, SLC39A7, ARMC6 and DNAJB12; 1-methylhistidine modification may affect t…	7118.44	11,71	CATALYTIC ACTIVITY
THE HUMAN PROTEIN ATLAS	BUD23 rRNA methyltransferase and ribosome maturation factor	Involved in the pre-rRNA processing steps leading to small-subunit rRNA production independently of its RNA-modifying catalytic activity. Important for biogenesis end export of the 40S ribosomal subunit independent on its methyltransferase activity	7152.25	11.26	TRANSCRIPTION
PMID: 33336429 DOI: 10.1002/lipd.12286	NCX1	Mediates the exchange of one Ca(2+) ion against three to four Na(+) ions across the cell membrane, and thereby contributes to the regulation of cytoplasmic Ca(2+) levels and Ca(2+)-dependent cellular processes 1, 2, 3. Contributes to Ca(2+) transport during excitation-contraction coupling in muscle.	7173.28	6.76	IMMUNOLOGICAL
THE HUMAN PROTEIN ATLAS	DENN domain containing 5A	Guanine nucleotide exchange factor (GEF) which may activate RAB6A and RAB39A and/or RAB39B. Promotes the exchange of GDP to GTP, converting inactive GDP-bound Rab proteins into their active GTP-bound form.	7177.93	4.14	METABOLIC
PMID: 26933915 DOI: 10.18632/oncotarget.7783	Calgranulin B	Calgranulin B is a small, calcium-binding protein expressed in neutrophils that is secreted into the tumor microenvironment in cancer cases.	7208.23	4.75	ANTIMICROBIAL
STRING	Mucin 15	May play a role in the cell adhesion to the extracellular matrix.	7210.05	4.2	ADHESION
PMID: 30696553 DOI: 10.1016/j.jdent.2018.08.010	Statherin	Salivary protein that stabilizes saliva supersaturated with calcium salts by inhibiting the precipitation of calcium phosphate salts. It also modulates hydroxyapatite crystal formation on the tooth surface	7304.47	8.01	ANTIMICROBIAL
UNIPROT	Squamous cell carcinoma antigen 1	SPARCL1 has been shown to be down-regulated in many types of cancer and may serve as a negative regulator of cell growth and proliferation.	7304.47	8.01	IMMUNOLOGICAL
PMID: 2257632 DOI: 10.1002/cm.970170202	Profilin	Profilin is a ubiquitous actin monomer-binding protein, found in organisms from yeast to humans. Biochemical studies indicate that profilin may regulate actin polymerization	7346.8	7.2	ADHESION
THE HUMAN PROTEIN ATLAS	FXYD domain containing ion transport regulator 2	May be involved in forming the receptor site for cardiac glycoside binding or may modulate the transport function of the sodium ATPase.	7355.42	8.93	CARRIER
THE HUMAN PROTEIN ATLAS	Protein arginine methyltransferase 5	Arginine methyltransferase that can both catalyze the formation of omega-N monomethylarginine (MMA) and symmetrical dimethylarginine (sDMA), with a preference for the formation of MMA. Methylates SUPT5H and may regulate its transcriptional elongation properties	7366.22	6.55	ENZYME
THE HUMAN PROTEIN ATLAS	ALG3 alpha-1,3- mannosyltransferase	The encoded protein catalyses the addition of the first dol-P-Man derived mannose in an alpha 1,3 linkage to Man5GlcNAc2-PP-Dol. Defects in this gene have been associated with congenital disorder of glycosylation type Id (CDG-Id) characterized by abnormal N-glycosylation	7450.75	11.38	METABOLIC
STRING	Proline rich 14	It functions in the attachment of peripheral heterochromatin to the nuclear lamina during interphase, possibly through interaction with the heterochromatin protein CBX5/HP1 alpha. It could play a role in the reinsertion of heterochromatin to the nuclear lamina at the mitotic output. It promotes myoblast differentiation during skeletal myogenesis, possibly by stimulating the activity of the transc…	7537.69	4.45	CELL CYCLE
THE HUMAN PROTEIN ATLAS	Ring finger protein 165	E3 ubiquitin-protein ligase that acts as a regulator of motor axon elongation. Required for efficient motor axon extension in the dorsal forelimb by enhancing the transcriptional responses of the SMAD1/SMAD5/SMAD8 effectors, which are activated downstream of BMP. Acts by mediating ubiquitination and degradation of SMAD inhibitors such as SMAD6, SMAD7, SKI and SNON isoform of SKIL.	7537.75	12.35	METABOLIC
THE HUMAN PROTEIN ATLAS	Tripartite motif containing 22	Interferon-induced E3 ubiquitin ligase that plays important roles in innate and adaptive immunity 1, 2. Restricts the replication of many viruses including HIV-1, encephalomyocarditis virus (EMCV), hepatitis B virus (HBV), hepatitis C virus (HCV) or Zika virus (ZIKV) 3, 4, 5. Mechanistically, negatively regulates HCV replication by promoting ubiquitination and subsequent degradation of viral NS5A…	7564.96	9,85	IMMUNOLOGICAL
THE HUMAN PROTEIN ATLAS	SATB homeobox 1	Crucial silencing factor contributing to the initiation of X inactivation mediated by Xist RNA that occurs during embryogenesis and in lymphoma (By similarity). Binds to DNA at special AT-rich sequences, the consensus SATB1-binding sequence (CSBS), at nuclear matrix-or scaffold-associated regions. Thought to recognize the sugar-phosphate structure of double-stranded DNA. Transcriptional repressor…	7584.61	10.11	INHIBITOR
THE HUMAN PROTEIN ATLAS	Schlafen family member 12	Ribonuclease which is part of an E2/17beta-estradiol-induced pro-apoptotic signaling pathway. E2 stabilizes the PDE3A/SLFN12 complex in the cytosol, promoting the dephosphorylation of SLFN12 and activating its pro-apoptotic ribosomal RNA/rRNA ribonuclease activity. This apoptotic pathway might be relevant in tissues with high concentration of E2 and be for instance involved in placenta remodeling…	7663.75	6.22	CELL DEATH
THE HUMAN PROTEIN ATLAS	SEM1 26S proteasome subunit	Component of the 26S proteasome, a multiprotein complex involved in the ATP-dependent degradation of ubiquitinated proteins. This complex plays a key role in the maintenance of protein homeostasis by removing misfolded or damaged proteins, which could impair cellular functions, and by removing proteins whose functions are no longer required. Therefore, the proteasome participates in numerous cell…	7675.99	3.54	STRUCTURAL
THE HUMAN PROTEIN ATLAS	Claudin 10	Plays a major role in tight junction-specific obliteration of the intercellular space, through calcium-independent cell-adhesion activity. Involved in the regulation of paracellular epithelia permeability to ions in multiple organs.	7709.25	8.8	CARRIER
THE HUMAN PROTEIN ATLAS	Salivary gland specific protein SAGSIN1	UNSPECIFIC	7727.29	10.87	UNSPECIFIC
THE HUMAN PROTEIN ATLAS	Golgi reassembly stacking protein 2	Plays a role in the assembly and membrane stacking of the Golgi cisternae, and in the process by which Golgi stacks reform after breakdown during mitosis and meiosis	7740.84	11.37	CELLULAR ORGANIZATION
THE HUMAN PROTEIN ATLAS	C-X9-C motif containing 4	This gene was identified by involvement in some t(X;14) translocations associated with mature T-cell proliferations.	7746.91	8.5	CELL CYCLE
THE HUMAN PROTEIN ATLAS	Family with sequence similarity 135 member B	It is expected to participate in the metabolic process of cellular lipids	7793.86	6.82	METABOLIC
PMID: 32015361 DOI: 10.1038/s41598-020-58585-4	Endothelin-1	It has been shown to play a key role in homeostasis and endothelial function and may be instrumental in the relationship between coronary heart disease and periodontitis.	7808.73	4.27	COAGULATION
STRING	Fatty acid binding protein 3	FABP are thought to play a role in the intracellular transport of long-chain fatty acids and their acyl-CoA esters.	7853.92	4.28	CARRIER
THE HUMAN PROTEIN ATLAS	Nucleobindin 2	Nucleobindin-2 (NUCB2) is the precursor protein of nesfatin-1, which have a variety of metabolic functions, such as food intake and temperature regulation.	7886.51	8.49	ADHESION
PMID: 11732842	Leucine-rich α2-glycoprotein	Increased leucine-rich α2-glycoprotein-1 (LRG1) has been observed in various inflammatory and autoimmune diseases.	7886.51	8.49	BIOMARKER
THE HUMAN PROTEIN ATLAS	Olfactory receptor family 51 subfamily E member 1	Odorant receptor.	7947.37	3.91	RECEPTOR
THE HUMAN PROTEIN ATLAS	Ubiquitin conjugating enzyme E2 Q1	Catalyzes the covalent attachment of ubiquitin to other proteins 1. May be involved in hormonal homeostasis in females. Involved in regulation of B4GALT1 cell surface expression, B4GALT1-mediated cell adhesion to laminin and embryoid body formation (By similarity).	7950.08	9.76	CATALYTIC ACTIVITY
THE HUMAN PROTEIN ATLAS	Ubiquitin conjugating enzyme E2 Q1	Catalyzes the covalent attachment of ubiquitin to other proteins 1. May be involved in hormonal homeostasis in females. Involved in regulation of B4GALT1 cell surface expression, B4GALT1-mediated cell adhesion to laminin and embryoid body formation (By similarity).	7950.08	9.76	CATALYTIC ACTIVITY
UNIPROT	Ubiquitin conjugating enzyme E2 Q1	Catalyzes the covalent attachment of ubiquitin to other proteins 1. May be involved in hormonal homeostasis in females. Involved in regulation of B4GALT1 cell surface expression, B4GALT1-mediated cell adhesion to laminin and embryoid body formation (By similarity).	7950.08	9.76	CATALYTIC ACTIVITY
UNIPROT	Ubiquitin conjugating enzyme E2 Q1	Catalyzes the covalent attachment of ubiquitin to other proteins 1. May be involved in hormonal homeostasis in females. Involved in regulation of B4GALT1 cell surface expression, B4GALT1-mediated cell adhesion to laminin and embryoid body formation (By similarity).	7950.08	9.76	CATALYTIC ACTIVITY
THE HUMAN PROTEIN ATLAS	Chromosome 16 open reading frame 74	UNSPECIFIC	8118.19	4.13	UNSPECIFIC
THE HUMAN PROTEIN ATLAS	SOS Ras/Rho guanine nucleotide exchange factor 2	Promotes the exchange of Ras-bound GDP by GTP.	8121.69	9.72	ACTIVATOR
THE HUMAN PROTEIN ATLAS	Proline rich 4	This gene encodes a member of the proline-rich protein family that lacks a conserved repetitive domain. This protein may play a role in protective functions in the eye. Alternative splicing result in multiple transcript variants. Read-through transcription also exists between this gene and the upstream PRH1 (proline-rich protein HaeIII subfamily 1) gene	8156.34	4.1	TRANSCRIPTION
PMID: 20512104	PRB1M protein (fragment)	General function(s) of a protein	8187.61	9.62	IMMUNOLOGICAL
THE HUMAN PROTEIN ATLAS	FKBP prolyl isomerase 11	PIases accelerate the folding of proteins during protein synthesis.	8209.56	6.71	ENZYME
THE HUMAN PROTEIN ATLAS	Zinc finger protein 461	May be involved in transcriptional regulation.	8213.36	5.15	TRANSCRIPTION
THE HUMAN PROTEIN ATLAS	Potassium voltage-gated channel subfamily Q member 5	Associates with KCNQ3 to form a potassium channel which contributes to M-type current, a slowly activating and deactivating potassium conductance which plays a critical role in determining the subthreshold electrical excitability of neurons.	8217.81	8.72	CELL FUNCTION REGULATOR
THE HUMAN PROTEIN ATLAS	Sirtuin 2	NAD-dependent protein deacetylase, which deacetylates internal lysines on histone and alpha-tubulin as well as many other proteins such as key transcription factors 1, 2, 3, 4, 5, 6, 7, 8, 9, 10, 11, 12, 13, 14, 15, 16, 17, 18. Participates in the modulation of multiple and diverse biological processes such as cell cycle control, genomic integrity, microtubule dynamics, cell differentiation, meta…	8218.38	6.16	CELL FUNCTION REGULATOR
THE HUMAN PROTEIN ATLAS	Transmembrane protein 97	Sigma-2 receptor which contributes to ameliorate dysfunctional cellular processes and slow degenerative progression by regulating cell functions including cholesterol biosynthesis/trafficking, membrane trafficking, autophagy, lipid membrane-bound protein trafficking, and receptor stabilization at the cell surface (Probable) 1, 2, 3, 4, 5, 6, 7, 8, 9. Forms a ternary complex with PGRMC1 receptor a…	8218.82	9,70	RECEPTOR
THE HUMAN PROTEIN ATLAS	NSF attachment protein alpha	Required for vesicular transport between the endoplasmic reticulum and the Golgi apparatus (Probable). Together with GNA12 promotes CDH5 localization to plasma membrane	8223.4	9.74	CELLULAR ORGANIZATION
THE HUMAN PROTEIN ATLAS	Asteroid homolog 1	Possible role in EGF receptor signaling.	8318.54	6.7	SIGNAL
THE HUMAN PROTEIN ATLAS	Apolipoprotein C4	May participate in lipoprotein metabolism.	8367	9.57	CARRIER
THE HUMAN PROTEIN ATLAS	Cytochrome c oxidase assembly factor 5	Involved in an early step of the mitochondrial complex IV assembly process.	8375.62	8.97	CELL FUNCTION REGULATOR
THE HUMAN PROTEIN ATLAS	High mobility group nucleosomal binding domain 3	Binds to nucleosomes, regulating chromatin structure and consequently, chromatin-dependent processes such as transcription, DNA replication and DNA repair.	8377.53	10.25	TRANSCRIPTION
THE HUMAN PROTEIN ATLAS	Prominin 1	May play a role in cell differentiation, proliferation and apoptosis 1. Binds cholesterol in cholesterol-containing plasma membrane microdomains and may play a role in the organization of the apical plasma membrane in epithelial cells. During early retinal development acts as a key regulator of disk morphogenesis. Involved in regulation of MAPK and Akt signaling pathways. In neuroblastoma cells s…	8380.59	4.49	TRANSCRIPTION
STRING	Fibroblast growth factor 7	It plays an important role in regulating embryonic development, cell proliferation, and differentiation. It is required for normal morphogenesis of branches. Active growth factor in keratinocytes. Possible main paracrine effector of normal epithelial cell proliferation.	8395.97	11.16	CELL CYCLE
PMID: 9848687 DOI: 10.1111/j.1574-695X.1998.tb01214.x	Fibronectin	in saliva plays a regulatory role in the pathogenesis mediated by Porphyromonas gingivalis fimbria in adult periodontal disease.	8402.32	4.91	IMMUNOLOGICAL
THE HUMAN PROTEIN ATLAS	Striatin 4	Calmodulin-binding scaffolding protein which is the center of the striatin-interacting phosphatase and kinase (STRIPAK) complexes 1, 2. STRIPAK complexes have critical roles in protein (de)phosphorylation and are regulators of multiple signaling pathways including Hippo, MAPK, nuclear receptor and cytoskeleton remodeling 3. Different types of STRIPAK complexes are involved in a variety of biologi…	8413.51	5.33	ADHESION
THE HUMAN PROTEIN ATLAS	Calcium/calmodulin dependent protein kinase II inhibitor 1	Plays a role in the maintenance of long-term retrieval-induced memory in response to contextual fear. Modulates blood pressure and vascular reactivity via regulation of CAMK2 activity in addition to regulation of left ventricular mass. Negatively effects insulin sensitivity and promotes lipid formation in adipose tissues independent of CAMK2 signaling	8552.62	5.22	INHIBITOR
UNIPROT	Trefoil factor 3	Involved in the maintenance and repair of the intestinal mucosa. Promotes the mobility of epithelial cells in healing processes (motogen).	8641.01	5.66	IMMUNOLOGICAL
THE HUMAN PROTEIN ATLAS	Calcium/calmodulin dependent protein kinase II inhibitor 2	Potent and specific cellular inhibitor of CaM-kinase II (CAMK2). CAMKII regulates numerous physiological functions, including neuronal synaptic plasticity through the phosphorylation of alpha-amino-3-hydroxy-5-methyl-4-isoxazolepropionic acid-type glutamate (AMPA) receptors.	8657.77	5.32	INHIBITOR
THE HUMAN PROTEIN ATLAS	Solute carrier family 31 member 2	Involved in low-affinity copper uptake.	8668.02	8.74	CARRIER
THE HUMAN PROTEIN ATLAS	Isoleucyl-tRNA synthetase 1	Catalyzes the specific attachment of an amino acid to its cognate tRNA in a 2 step reaction: the amino acid (AA) is first activated by ATP to form AA-AMP and then transferred to the acceptor end of the tRNA	8676.96	5.63	ENZYME
THE HUMAN PROTEIN ATLAS	Small integral membrane protein 4	May modulate lipid droplet formation throught interaction with SQLE	8682.15	10.87	METABOLIC
THE HUMAN PROTEIN ATLAS	SR-related CTD associated factor 11	Plays a role in pre-mRNA alternative splicing by regulating spliceosome assembly	8691.03	4.7	TRANSCRIPTION
THE HUMAN PROTEIN ATLAS	Vacuolar ATPase assembly factor VMA21	Required for the assembly of the V0 complex of the vacuolar ATPase (V-ATPase) in the endoplasmic reticulum	8731.3	4.52	CARRIER
UNIPROT	Vacuolar ATPase assembly factor VMA21	Required for the assembly of the V0 complex of the vacuolar ATPase (V-ATPase) in the endoplasmic reticulum	8731.3	4.52	ENZYME
THE HUMAN PROTEIN ATLAS	Small integral membrane protein 1 (Vel blood group)	Regulator of red blood cell formation.	8749.12	9.22	CELL FUNCTION REGULATOR
THE HUMAN PROTEIN ATLAS	DEAD-box helicase 3 X-linked	The ATPase activity can be stimulated by various ribo-and deoxynucleic acids indicative for a relaxed substrate specificity	8772.35	9.89	ENZYME
THE HUMAN PROTEIN ATLAS	Solute carrier family 11 member 2	Proton-coupled metal ion symporter operating with a proton to metal ion stoichiometry of 1:1 1, 2, 3, 4, 5. Selectively transports various divalent metal cations, in decreasing affinity: Cd(2+) > Fe(2+) > Co(2+), Mn(2+) >> Zn(2+), Ni(2+), VO(2+) 6, 7, 8, 9, 10. Essential for maintenance of iron homeostasis by modulating intestinal absorption of dietary Fe(2+) and TF-associated endosomal Fe(2+) tr…	8799.56	4.34	CARRIER
THE HUMAN PROTEIN ATLAS	SEC63 homolog, protein translocation regulator	Mediates cotranslational and post-translational transport of certain precursor polypeptides across endoplasmic reticulum (ER) 1, 2. Proposed to play an auxiliary role in recognition of precursors with short and apolar signal peptides. May cooperate with SEC62 and HSPA5/BiP to facilitate targeting of small presecretory proteins into the SEC61 channel-forming translocon complex, triggering channel …	8837.92	5.33	CARRIER
PMID: 34697154 DOI: 10.21873/invivo.12618	Kallikrein 11	Expression of kallikrein-11 (KLK11) has been found to be related to the prognosis of various human cancer types but its physiological functions in the steps of breast cancer (BC) progression are still unknown.	8856.28	5.04	BIOMARKER
THE HUMAN PROTEIN ATLAS	Insulin like growth factor 2 mRNA binding protein 3	RNA-binding factor that recruits target transcripts to cytoplasmic protein-RNA complexes (mRNPs). This transcript 'caging' into mRNPs allows mRNA transport and transient storage.	8893.14	5.51	TRANSCRIPTION
THE HUMAN PROTEIN ATLAS	Aldehyde dehydrogenase 1 family member L1	Cytosolic 10-formyltetrahydrofolate dehydrogenase that catalyzes the NADP(+)-dependent conversion of 10-formyltetrahydrofolate to tetrahydrofolate and carbon dioxide	8960.39	8.99	METABOLIC
THE HUMAN PROTEIN ATLAS	ATPase H+ transporting V1 subunit G2	Subunit of the V1 complex of vacuolar(H+)-ATPase (V-ATPase), a multisubunit enzyme composed of a peripheral complex (V1) that hydrolyzes ATP and a membrane integral complex (V0) that translocates protons. V-ATPase is responsible for acidifying and maintaining the pH of intracellular compartments and in some cell types, is targeted to the plasma membrane, where it is responsible for acidifying the…	8972.02	9.18	CARRIER
THE HUMAN PROTEIN ATLAS	Septin 3	Filament-forming cytoskeletal GTPase (By similarity). May play a role in cytokinesis (Potential).	9060.63	9.87	CELL CYCLE
THE HUMAN PROTEIN ATLAS	R-spondin 2	Activator of the canonical Wnt signaling pathway by acting as a ligand for LGR4-6 receptors. Upon binding to LGR4-6 (LGR4, LGR5 or LGR6), LGR4-6 associate with phosphorylated LRP6 and frizzled receptors that are activated by extracellular Wnt receptors, triggering the canonical Wnt signaling pathway to increase expression of target genes. Also regulates the canonical Wnt/beta-catenin-dependent pa…	9112.61	9.53	ACTIVATOR
THE HUMAN PROTEIN ATLAS	Pancreatic progenitor cell differentiation and proliferation factor like	Predicted to be involved in cell differentiation	9188.22	6.53	CELL CYCLE
THE HUMAN PROTEIN ATLAS	Hes family bHLH transcription factor 2	Transcriptional repressor of genes that require a bHLH protein for their transcription	9221.81	10.55	TRANSCRIPTION
THE HUMAN PROTEIN ATLAS	Golgin A2	Peripheral membrane component of the cis-Golgi stack that acts as a membrane skeleton that maintains the structure of the Golgi apparatus, and as a vesicle thether that facilitates vesicle fusion to the Golgi membrane (Probable)	9272.3	9.44	CELLULAR ORGANIZATION
THE HUMAN PROTEIN ATLAS	Tektin 1	Microtubule inner protein (MIP) part of the dynein-decorated doublet microtubules (DMTs) in cilia and flagellar axoneme. Forms filamentous polymers in the walls of ciliary and flagellar microtubules.	9280.58	10	CELLULAR ORGANIZATION
THE HUMAN PROTEIN ATLAS	SEC31 homolog B, COPII coat complex component	As a component of the coat protein complex II (COPII), may function in vesicle budding and cargo export from the endoplasmic reticulum.	9327.58	6.54	CARRIER
THE HUMAN PROTEIN ATLAS	SH3 domain binding glutamate rich protein like 3	Could act as a modulator of glutaredoxin biological activity (Probable). May play a role in cytoskeleton organization.	9380.52	9.42	CELL FUNCTION REGULATOR
THE HUMAN PROTEIN ATLAS	Caspase 6	Cysteine protease that plays essential roles in programmed cell death, axonal degeneration, development and innate immunity	9389.55	8.77	CELL DEATH
PMID: 34571894 DOI: 10.3390/cells10092245	ATP-binding cassette transporter ABC3	The ATP-binding cassette (ABC) superfamily consists of both importers and exporters. These transporters have, by tradition, been classified according to the ATP hydrolyzing constituents, which are monophyletic. ABC3 porters arose by duplication of a primordial four-TMS-encoding genetic element, yielding either eight- or 10-TMS proteins.	9405.82	5.15	IMMUNOLOGICAL
STRING	Mucin 7, secreted	It may have a protective function by promoting the elimination of bacteria in the oral cavity and aiding in chewing, speech, and swallowing. It joins the pili of P. aeruginosa.	9462.45	3.95	ANTIMICROBIAL
THE HUMAN PROTEIN ATLAS	Target of myb1 like 2 membrane trafficking protein	Acts as a MYO6/Myosin VI adapter protein that targets myosin VI to endocytic structures 1. May also play a role in recruiting clathrin to endosomes 2. May regulate growth factor-induced mitogenic signalin	9474.06	8.54	CARRIER
THE HUMAN PROTEIN ATLAS	Solute carrier family 16 member 6	Monocarboxylate transporter selective for taurine. May associate with BSG/CD147 or EMB/GP70 ancillary proteins to mediate facilitative efflux or influx of taurine across the plasma membrane. The transport is pH- and sodium-independent. Rather low-affinity, is likely effective for taurine transport in tissues where taurine is present at high concentrations.	9518.04	4.99	CARRIER
THE HUMAN PROTEIN ATLAS	BPIFB1	BPI fold-containing family B member 1; May play a role in innate immunity in mouth, nose and lungs. Binds bacterial lipopolysaccharide (LPS) and modulates the cellular responses to LPS; Belongs to the BPI/LBP/Plunc superfamily. Plunc family	9534.99	4.28	IMMUNOLOGICAL
STRING	Amylase alpha 1A	Calcium-bound enzyme that initiates the digestion of starch in the oral cavity 1. It catalyzes the hydrolysis of internal (1->4)-alpha-D-glycosidic bonds, resulting in a mixture of maltose, isomaltose, small amounts of glucose as well as small linear and branched oligosaccharides called dextrins	9535.89	4.01	ENZYME
STRING	Amylase alpha 1C	Calcium-bound enzyme that initiates the digestion of starch in the oral cavity. It catalyzes the hydrolysis of internal (1->4)-alpha-D-glycosidic bonds, resulting in a mixture of maltose, isomaltose, small amounts of glucose as well as small linear and branched oligosaccharides called dextrins	9567.95	4.01	ENZYME
STRING	Amylase alpha 1B	Calcium-bound enzyme that initiates the digestion of starch in the oral cavity. It catalyzes the hydrolysis of internal (1->4)-alpha-D-glycosidic bonds, resulting in a mixture of maltose, isomaltose, small amounts of glucose as well as small linear and branched oligosaccharides called dextrins	9579.47	4.01	ENZYME
STRING	Amylase alpha 2B	Amylases are secreted proteins that hydrolyze the 1,4-alpha-glycoside bonds of oligosaccharides and polysaccharides, thereby catalyzing the first step in the digestion of dietary starch and glycogen. The human genome has a group of several amylase genes that are expressed at high levels in the salivary gland or pancreas. This gene encodes an amylase isoenzyme produced by the pancreas.	9579.47	4.01	ENZYME
THE HUMAN PROTEIN ATLAS	NDRG family member 2	Contributes to the regulation of the Wnt signaling pathway. Down-regulates CTNNB1-mediated transcriptional activation of target genes, such as CCND1, and may thereby act as tumor suppressor. May be involved in dendritic cell and neuron differentiation.	9607.92	5	CELL CYCLE
THE HUMAN PROTEIN ATLAS	Methyltransferase like 27	This gene encodes a protein belonging to ubiE/COQ5 methyltransferase family. The gene is deleted in Williams syndrome, a multisystem developmental disorder caused by the deletion of contiguous genes at 7q11.22-q11.23. [provided by RefSeq, Jul 2008]	9651.98	5,42	BIOMARKER
THE HUMAN PROTEIN ATLAS	CAMP regulated phosphoprotein 21	Isoform 2 may act as a competitive inhibitor of calmodulin-dependent enzymes such as calcineurin in neurons.	9674.49	4.64	INHIBITOR
THE HUMAN PROTEIN ATLAS	Chromosome 5 open reading frame 46	Located in extracellular exosome.	9693.09	4.67	STRUCTURAL
THE HUMAN PROTEIN ATLAS	Follicular dendritic cell secreted protein	Can bind to the surface of B-lymphoma cells, but not T-lymphoma cells, consistent with a function as a secreted mediator acting upon B-cells.	9700.36	9.3	IMMUNOLOGICAL
THE HUMAN PROTEIN ATLAS	Dynactin subunit 5	This gene encodes a subunit of dynactin, a component of the cytoplasmic dynein motor machinery involved in minus-end-directed transport.	9740.11	9.25	ACTIVATOR
THE HUMAN PROTEIN ATLAS	Snail family transcriptional repressor 2	Transcriptional repressor that modulates both activator-dependent and basal transcription. Involved in the generation and migration of neural crest cells. Plays a role in mediating RAF1-induced transcriptional repression of the TJ protein, occludin (OCLN) and subsequent oncogenic transformation of epithelial cells (By similarity). Represses BRCA2 expression by binding to its E2-box-containing sil…	9752.14	9.05	INHIBITOR
THE HUMAN PROTEIN ATLAS	Tensin 1	May act as a protein phosphatase and/or a lipid phosphatase (Probable). Involved in fibrillar adhesion formation	9857.57	8.58	ADHESION
UNIPROT	Gene c-Abl protein (fragment)	The kinase c-Abl can modulate gene expression through transcription factors and chromatin modifiers.	9917.24	11.33	ADHESION
UNIPROT	Galectin 3-binding protein	Promotes integrin-mediated cell adhesion. May stimulate host defense against viruses and tumor cells.	9917.24	11.33	IMMUNOLOGICAL
THE HUMAN PROTEIN ATLAS	SEC61 translocon subunit beta	Component of SEC61 channel-forming translocon complex that mediates transport of signal peptide-containing precursor polypeptides across the endoplasmic reticulum (ER) 1. Forms a ribosome receptor and a gated pore in the ER membrane, both functions required for cotranslational translocation of nascent polypeptides 2. The SEC61 channel is also involved in ER membrane insertion of transmembrane pro…	9974.45	11.57	STRUCTURAL
THE HUMAN PROTEIN ATLAS	EARP complex and GARP complex interacting protein 1	Acts as a component of endosomal retrieval machinery that is involved in protein transport from early endosomes to either recycling endosomes or the trans-Golgi network	10041.5	7.77	CELLULAR ORGANIZATION
THE HUMAN PROTEIN ATLAS	Interleukin 1 receptor associated kinase 3	Putative inactive protein kinase which regulates signaling downstream of immune receptors including IL1R and Toll-like receptors	10046.7	6.25	IMMUNOLOGICAL
THE HUMAN PROTEIN ATLAS	Hook microtubule tethering protein 2	Component of the FTS/Hook/FHIP complex (FHF complex). The FHF complex may function to promote vesicle trafficking and/or fusion via the homotypic vesicular protein sorting complex (the HOPS complex).	10053.3	5.71	CELLULAR ORGANIZATION
THE HUMAN PROTEIN ATLAS	BAF nuclear assembly factor 1	Non-specific DNA-binding protein that plays key roles in mitotic nuclear reassembly, chromatin organization, DNA damage response, gene expression and intrinsic immunity against foreign DNA	10058.6	5.81	BIOMARKER
PMID: 9346278 DOI: 10.1111/j.1432-1033.1997.00270.x	α2-macroglobulin receptor precursor	Very-low-density lipoprotein receptor (VLDLR) and alpha2-macroglobulin receptor/low-density-lipoprotein-receptor-related protein (alpha2MR/LRP) are multifunctional endocytosis receptors of the low-density lipoprotein receptor family. Both have been shown to mediate endocytosis and degradation of complex between plasminogen activators and type-1 plasminogen-activator inhibitor (PAI-1) by cultured …	10140.2	4.37	CELL CYCLE
THE HUMAN PROTEIN ATLAS	Diazepam binding inhibitor, acyl-CoA binding protein	Binds medium- and long-chain acyl-CoA esters with very high affinity and may function as an intracellular carrier of acyl-CoA esters. It is also able to displace diazepam from the benzodiazepine (BZD) recognition site located on the GABA type A receptor.	10144.6	6.12	CELL FUNCTION REGULATOR
PMID: 26263539 DOI: 10.1016/j.archoralbio.2015.07.006	IL-1ra	implicated to play a pivotal role in chronic inflammatory conditions. high serum levels of IL-1ra, which inhibits the pro-inflammatory effect of IL-1, were found in patients with metabolic syndrome.	10165.5	4.56	IMMUNOLOGICAL
THE HUMAN PROTEIN ATLAS	Fatty acid binding protein 3	FABP are thought to play a role in the intracellular transport of long-chain fatty acids and their acyl-CoA esters.	10169.7	9	CELL FUNCTION REGULATOR
THE HUMAN PROTEIN ATLAS	Chromosome 4 open reading frame 48	Testis-derived lumicrine factor that triggers epididymal differentiation and sperm maturation.	10170	8.69	CELL FUNCTION REGULATOR
THE HUMAN PROTEIN ATLAS	Ret proto-oncogene	Receptor tyrosine-protein kinase involved in numerous cellular mechanisms including cell proliferation, neuronal navigation, cell migration, and cell differentiation in response to glia cell line-derived growth family factors (GDNF, NRTN, ARTN, PSPN and GDF15) 1, 2, 3, 4, 5, 6, 7, 8, 9, 10. In contrast to most receptor tyrosine kinases, RET requires not only its cognate ligands but also corecepto…	10171.9	7.91	RECEPTOR
PROSITE	Defensin α-1 precursor	Protein kinase domain, Protein kinases ATP-binding region, Tyrosine protein kinases specific active-site, EF-hand calcium-binding [Rattus norvegicus]	10201	6.54	IMMUNOLOGICAL
PROSITE	Defensin α-3 precursor, neutrophil-specific	Mammalian defensins	10245	5.71	IMMUNOLOGICAL
THE HUMAN PROTEIN ATLAS	TBC1 domain family member 30	May act as a GTPase-activating protein for Rab family protein(s).	10362.9	4.99	ACTIVATOR
THE HUMAN PROTEIN ATLAS	Meis homeobox 2	Involved in transcriptional regulation. Binds to HOX or PBX proteins to form dimers, or to a DNA-bound dimer of PBX and HOX proteins and thought to have a role in stabilization of the homeoprotein-DNA complex. Isoform 3 is required for the activity of a PDX1:PBX1b:MEIS2b complex in pancreatic acinar cells involved in the transcriptional activation of the ELA1 enhancer; the complex binds to the en…	10367.4	5,46	TRANSCRIPTION
UNIPROT	RNA-binding protein 2	RNA-binding protein implicated in the regulation of several post-transcriptional events. Involved in pre-mRNA alternative splicing, mRNA translation and stability. Mediates exon inclusion and/or exclusion in pre-mRNA that are subject to tissue-specific and developmentally regulated alternative splicing.	10399.9	4.75	ADHESION
THE HUMAN PROTEIN ATLAS	ELOVL fatty acid elongase 7	Catalyzes the first and rate-limiting reaction of the four reactions that constitute the long-chain fatty acids elongation cycle.	10474.4	5.65	ENZYME
THE HUMAN PROTEIN ATLAS	NK6 homeobox 1	Transcription factor which binds to specific A/T-rich DNA sequences in the promoter regions of a number of genes. Involved in the development of insulin-producing beta cells in the islets of Langerhans at the secondary transition (By similarity). Together with NKX2-2 and IRX3 acts to restrict the generation of motor neurons to the appropriate region of the neural tube.	10487.5	6.3	TRANSCRIPTION
THE HUMAN PROTEIN ATLAS	Family with sequence similarity 104 member A	UNSPECIFIC	10499.8	12.26	UNSPECIFIC
THE HUMAN PROTEIN ATLAS	Allograft inflammatory factor 1 like	Actin-binding protein that promotes actin bundling. May neither bind calcium nor depend on calcium for function.	10501.4	5.81	ADHESION
THE HUMAN PROTEIN ATLAS	Progesterone receptor membrane component 2	Required for the maintenance of uterine histoarchitecture and normal female reproductive lifespan (By similarity). May serve as a universal non-classical progesterone receptor in the uterus (Probable). Intracellular heme chaperone required for delivery of labile, or signaling heme, to the nucleus (By similarity). Plays a role in adipocyte function and systemic glucose homeostasis 1. In brown fat,…	10515.5	4.41	CELLULAR ORGANIZATION
THE HUMAN PROTEIN ATLAS	Ribosomal protein S2	Component of the ribosome, a large ribonucleoprotein complex responsible for the synthesis of proteins in the cell 1. The small ribosomal subunit (SSU) binds messenger RNAs (mRNAs) and translates the encoded message by selecting cognate aminoacyl-transfer RNA (tRNA) molecules 2. The large subunit (LSU) contains the ribosomal catalytic site termed the peptidyl transferase center (PTC), which catal…	10541.1	9.29	CELL FUNCTION REGULATOR
PMID: 15207811	VEGF	Vascular endothelial growth factor (VEGF) represents a growth factor with important pro-angiogenic activity, having a mitogenic and an anti-apoptotic effect on endothelial cells, increasing the vascular permeability, promoting cell migration, etc. Due to these effects, it actively contributes in regulating the normal and pathological angiogenic processes.	10545.8	4.39	ADHESION
THE HUMAN PROTEIN ATLAS	S100 calcium binding protein A1	Small calcium binding protein that plays important roles in several biological processes such as Ca(2+) homeostasis, chondrocyte biology and cardiomyocyte regulation 1. In response to an increase in intracellular Ca(2+) levels, binds calcium which triggers conformational changes 2. These changes allow interactions with specific target proteins and modulate their activity 3. Regulates a network in…	10545.8	4.39	CELL FUNCTION REGULATOR
THE HUMAN PROTEIN ATLAS	Transmembrane protein 237	Component of the transition zone in primary cilia. Required for ciliogenesis.	10589	10,46	SIGNAL
THE HUMAN PROTEIN ATLAS	Transmembrane protein 41A	Predicted to be integral component of membrane.	10590.4	9,44	STRUCTURAL
THE HUMAN PROTEIN ATLAS	Multiple coagulation factor deficiency 2, ER cargo receptor complex subunit	The MCFD2-LMAN1 complex forms a specific cargo receptor for the ER-to-Golgi transport of selected proteins. Plays a role in the secretion of coagulation factors.	10603.7	4,27	SECRETOR
THE HUMAN PROTEIN ATLAS	Clathrin heavy chain	Clathrin is the major protein of the polyhedral coat of coated pits and vesicles.	10617.4	8.57	CELL FUNCTION REGULATOR
THE HUMAN PROTEIN ATLAS	Selenoprotein K	Required for Ca(2+) flux in immune cells and plays a role in T-cell proliferation and in T-cell and neutrophil migration. Involved in endoplasmic reticulum-associated degradation (ERAD) of soluble glycosylated proteins	10645	10.86	CARRIER
THE HUMAN PROTEIN ATLAS	Triosephosphate isomerase 1	Triosephosphate isomerase is an extremely efficient metabolic enzyme that catalyzes the interconversion between dihydroxyacetone phosphate (DHAP) and D-glyceraldehyde-3-phosphate (G3P) in glycolysis and gluconeogenesis.	10646.2	5,30	CATALYTIC ACTIVITY
THE HUMAN PROTEIN ATLAS	Heat shock protein family E (Hsp10) member 1	Co-chaperonin implicated in mitochondrial protein import and macromolecular assembly	10689.5	9.62	CELL FUNCTION REGULATOR
THE HUMAN PROTEIN ATLAS	Pleckstrin homology and RUN domain containing M1	Acts as a multivalent adapter protein that regulates Rab7-dependent and HOPS complex-dependent fusion events in the endolysosomal system and couples autophagic and the endocytic trafficking pathways. Acts as a dual effector of RAB7A and ARL8B that simultaneously binds these GTPases, bringing about clustering and fusion of late endosomes and lysosomes 1, 2. Required for late stages of endolysosoma…	10717.6	9.67	CELL FUNCTION REGULATOR
THE HUMAN PROTEIN ATLAS	Caspase recruitment domain family member 16	Caspase inhibitor. Acts as a regulator of procaspase-1/CASP1 activation implicated in the regulation of the proteolytic maturation of pro-interleukin-1 beta (IL1B) and its release during inflammation. Inhibits the release of IL1B in response to LPS in monocytes. Also induces NF-kappa-B activation during the pro-inflammatory cytokine response. Also able to inhibit CASP1-mediated neuronal cell deat…	10737.5	5.13	INHIBITOR
THE HUMAN PROTEIN ATLAS	Solute carrier family 6 member 15	Functions as a sodium-dependent neutral amino acid transporter. Exhibits preference for the branched-chain amino acids, particularly leucine, valine and isoleucine and methionine. Can also transport low-affinity substrates such as alanine, phenylalanine, glutamine and pipecolic acid. Mediates the saturable, pH-sensitive and electrogenic cotransport of proline and sodium ions with a stoichiometry …	10737.8	4.26	CARRIER
THE HUMAN PROTEIN ATLAS	Small integral membrane protein 12	Predicted to be integral component of membrane	10799.4	8.01	STRUCTURAL
UNIPROT	Bactericidal/permeability increasing protein-like 1 (LPLUNC2)	Catalyzes the ATP-dependent transport of phospholipids such as phosphatidylcholine and phosphoglycerol from the cytoplasm into the lumen side of lamellar bodies, in turn participates in the lamellar bodies biogenesis and homeostasis of pulmonary surfactant	10824.9	7.03	IMMUNOLOGICAL
THE HUMAN PROTEIN ATLAS	RNA binding motif protein 48	As a component of the minor spliceosome, involved in the splicing of U12-type introns in pre-mRNAs.	10827.4	5.86	TRANSCRIPTION
STRING	Calgranulin A	Calgranulin A may function in the inhibition of casein kinase and as a cytokine, and S100 proteins are involved in cell differentiation and cell cycle regulation	10834.5	6.5	ANTIMICROBIAL
THE HUMAN PROTEIN ATLAS	Transmembrane protein 132A	May play a role in embryonic and postnatal development of the brain. Increased resistance to cell death induced by serum starvation in cultured cells. Regulates cAMP-induced GFAP gene expression via STAT3 phosphorylation (By similarity).	10921.4	4,96	CELL FUNCTION REGULATOR
THE HUMAN PROTEIN ATLAS	CD14 molecule	Coreceptor for bacterial lipopolysaccharide 1, 2. In concert with LBP, binds to monomeric lipopolysaccharide and delivers it to the LY96/TLR4 complex, thereby mediating the innate immune response to bacterial lipopolysaccharide (LPS) 3, 4, 5. Acts via MyD88, TIRAP and TRAF6, leading to NF-kappa-B activation, cytokine secretion and the inflammatory response 6. Acts as a coreceptor for TLR2:TLR6 he…	10921.6	9.62	IMMUNOLOGICAL
THE HUMAN PROTEIN ATLAS	Exoribonuclease 1	RNA exonuclease that binds to the 3'-end of histone mRNAs and degrades them, suggesting that it plays an essential role in histone mRNA decay after replication. A 2' and 3'-hydroxyl groups at the last nucleotide of the histone 3'-end is required for efficient degradation of RNA substrates.	10977.2	4.72	ENZYME
THE HUMAN PROTEIN ATLAS	Aldo-keto reductase family 1 member B	Catalyzes the NADPH-dependent reduction of a wide variety of carbonyl-containing compounds to their corresponding alcohols. Displays enzymatic activity towards endogenous metabolites such as aromatic and aliphatic aldehydes, ketones, monosacharides, bile acids and xenobiotics substrates.	11004.8	6.26	METABOLIC
THE HUMAN PROTEIN ATLAS	Cystatin A	This is an intracellular thiol proteinase inhibitor. Has an important role in desmosome-mediated cell-cell adhesion in the lower levels of the epidermis; Belongs to the cystatin family	11006.5	5.38	INHIBITOR
THE HUMAN PROTEIN ATLAS	S100 calcium binding protein A2	May function as calcium sensor and modulator, contributing to cellular calcium signaling. May function by interacting with other proteins, such as TPR-containing proteins, and indirectly play a role in many physiological processes. May also play a role in suppressing tumor cell growth.	11116.8	4.68	SIGNAL
THE HUMAN PROTEIN ATLAS	Host cell factor C1 regulator 1	Regulates HCFC1 activity by modulating its subcellular localization. Overexpression of HCFC1R1 leads to accumulation of HCFC1 in the cytoplasm. HCFC1R1-mediated export may provide the pool of cytoplasmic HCFC1 required for import of virion-derived VP16 into the nucleus.	11143.8	5.52	CELL FUNCTION REGULATOR
PMID: 34802565 DOI: 10.1016/j.kint.2021.10.009	Annexin A1	Annexin A1 (ANXA1), as an endogenous mediator, plays an important role in resolving inflammation. Whether ANXA1 could affect established diabetic nephropathy through modulating inflammatory states remains largely unknown.	11184	6.57	IMMUNOLOGICAL
THE HUMAN PROTEIN ATLAS	C-C motif chemokine ligand 19	May play a role not only in inflammatory and immunological responses but also in normal lymphocyte recirculation and homing. May play an important role in trafficking of T-cells in thymus, and T-cell and B-cell migration to secondary lymphoid organs	11340.4	9.16	INFLAMMATORY
PMID: 15064728 DOI: 10.1038/sj.onc.1207126	Resistin	Hormone that seems to suppress insulin ability to stimulate glucose uptake into adipose cells. Potentially links obesity to diabetes. Promotes chemotaxis in myeloid cells	11419.3	6.52	HORMONAL
THE HUMAN PROTEIN ATLAS	Solute carrier family 39 member 3	Transporter for the divalent cation Zn(2+). Mediates the influx of Zn(2+) into cells from extracellular space. Controls Zn(2+) accumulation into dentate gyrus granule cells in the hippocampus. Mediates Zn(2+) reuptake from the secreted milk within the alveolar lumen.	11459	9.66	CARRIER
THE HUMAN PROTEIN ATLAS	Defensin beta 116	Has antibacterial activity.	11544.3	8.71	ANTIMICROBIAL
THE HUMAN PROTEIN ATLAS	Transmembrane protein 213	Se prevé que sea un componente integral de la membrana	11555	6.81	STRUCTURAL
THE HUMAN PROTEIN ATLAS	KIAA0040	Predicted to be integral component of membrane. [provided by Alliance of Genome Resources, Apr 2022]	11562.9	9,62	STRUCTURAL
THE HUMAN PROTEIN ATLAS	Coiled-coil domain containing 17	UNSPECIFIC	11591.9	4.94	UNSPECIFIC
THE HUMAN PROTEIN ATLAS	Glycoprotein alpha-galactosyltransferase 1 (inactive)	La alfa-1,3-galactosiltransferasa (GGTA1) es una enzima presente en la mayoría de los mamíferos, excepto en el hombre, los simios y los monos del Viejo Mundo. Se cree que este gen codifica una forma truncada y no enzimática de la proteína GGTA1, que carece del dominio catalítico C-terminal. La expresión aberrante de la proteína GGTA1 en el hombre puede provocar enfermedades autoinmunes y, en ocas…	11625.1	5,61	ENZYME
THE HUMAN PROTEIN ATLAS	SEC62 homolog, preprotein translocation factor	Mediates post-translational transport of precursor polypeptides across endoplasmic reticulum (ER). Proposed to act as a targeting receptor for small presecretory proteins containing short and apolar signal peptides. Targets and properly positions newly synthesized presecretory proteins into the SEC61 channel-forming translocon complex, triggering channel opening for polypeptide translocation to t…	11627.4	9.23	CARRIER
THE HUMAN PROTEIN ATLAS	Potassium voltage-gated channel subfamily E regulatory subunit 3	Ancillary protein that assembles as a beta subunit with a voltage-gated potassium channel complex of pore-forming alpha subunits.	11710.4	8.82	CELL FUNCTION REGULATOR
THE HUMAN PROTEIN ATLAS	DEAD-box helicase 49	Helicase, Hydrolase, RNA-binding	11719.6	8.74	CELL FUNCTION REGULATOR
THE HUMAN PROTEIN ATLAS	TPD52 like 1	This gene encodes a member of a family of proteins that contain coiled-coil domains and may form hetero- or homomers. The encoded protein is involved in cell proliferation and calcium signaling.	11721.4	8.89	CELL FUNCTION REGULATOR
PMID: 27034797 DOI: 10.3978/j.issn.2078-6891.2015.064	Testicular protein kinase	Dual specificity protein kinase activity catalyzing autophosphorylation and phosphorylation of exogenous substrates on both serine/threonine and tyrosine residues. Phosphorylates cofilin at 'Ser-3'. May play an important role in spermatogenesis.	11737.5	4.82	ENZYME
UNIPROT	Thioredoxin	Dual specificity protein kinase activity catalyzing autophosphorylation and phosphorylation of exogenous substrates on both serine/threonine and tyrosine residues. Phosphorylates cofilin at 'Ser-3'. May play an important role in spermatogenesis.	11737.5	4.82	METABOLIC
THE HUMAN PROTEIN ATLAS	Glutaredoxin	Has a glutathione-disulfide oxidoreductase activity in the presence of NADPH and glutathione reductase. Reduces low molecular weight disulfides and proteins.	11775.7	8.33	CARRIER
THE HUMAN PROTEIN ATLAS	Signal peptidase complex subunit 1	Component of the signal peptidase complex (SPC) which catalyzes the cleavage of N-terminal signal sequences from nascent proteins as they are translocated into the lumen of the endoplasmic reticulum 1. Dispensable for SPC enzymatic activity	11804.8	9.34	CATALYTIC ACTIVITY
STRING	Carbonic anhydrase 6	Reversible hydration of carbon dioxide. Its role in saliva is unknown; Carbonic anhydrases	11829	5.23	METABOLIC
THE HUMAN PROTEIN ATLAS	ELOVL fatty acid elongase 6	Catalyzes the first and rate-limiting reaction of the four reactions that constitute the long-chain fatty acids elongation cycle.	11873	9	ENZYME
THE HUMAN PROTEIN ATLAS	CAS1 domain containing 1	O-acetyltransferase that catalyzes 9-O-acetylation of sialic acids, Sialic acids are sugars at the reducing end of glycoproteins and glycolipids, and are involved in various processes such as cell-cell interactions, host-pathogen recognition	11902.4	10.03	ENZYME
THE HUMAN PROTEIN ATLAS	SWI/SNF-related, matrix associated, actin dependent regulator of chromatin subfamily e, member 1	Adapter protein implicated in the regulation of a large spectrum of both general and specialized signaling pathways. Binds to a large number of partners, usually by recognition of a phosphoserine or phosphothreonine motif. Binding generally results in the modulation of the activity of the binding partner. When bound to KRT17, regulates protein synthesis and epithelial cell growth by stimulating A…	11915.6	11915.6	TRANSCRIPTION
THE HUMAN PROTEIN ATLAS	UBA like domain containing 1	UNSPECIFIC	12078.4	6.26	UNSPECIFIC
THE HUMAN PROTEIN ATLAS	UBA like domain containing 1	UNSPECIFIC	12078.4	6.26	UNSPECIFIC
UNIPROT	UBA like domain containing 1	UNSPECIFIC	12078.4	6.26	UNSPECIFIC
UNIPROT	UBA like domain containing 1	UNSPECIFIC	12078.4	6.26	UNSPECIFIC
STRING	Carbonic anhydrase 12	Reversible hydration of carbon dioxide.	12079.7	5.23	METABOLIC
THE HUMAN PROTEIN ATLAS	LY6/PLAUR domain containing 5	Predicted to be located in extracellular region. Predicted to be active in plasma membrane	12096.7	6.01	CELL FUNCTION REGULATOR
THE HUMAN PROTEIN ATLAS	Transforming growth factor beta 3	Transforming growth factor beta-3 proprotein: Precursor of the Latency-associated peptide (LAP) and Transforming growth factor beta-3 (TGF-beta-3) chains, which constitute the regulatory and active subunit of TGF-beta-3, respectively.	12115	6,51	SIGNAL
THE HUMAN PROTEIN ATLAS	Regulatory subunit of type II PKA R-subunit domain containing 1	Enzyme and pathway databases	12158.1	9.56	ENZYME
THE HUMAN PROTEIN ATLAS	Synaptopodin 2 like	Actin-associated protein that may play a role in modulating actin-based shape.	12161.4	4.49	MOTOR
UNIPROT	HSPC258 (fragment)	Acts as an inhibitor of histone acetyltransferase activity; prevents acetylation of all core histones	12207.2	9.79	INHIBITOR
THE HUMAN PROTEIN ATLAS	CD14	Monocyte differentiation antigen CD14; Coreceptor for bacterial lipopolysaccharide. In concert with LBP, binds to monomeric lipopolysaccharide and delivers it to the LY96/TLR4 complex, thereby mediating the innate immune response to bacterial lipopolysaccharide (LPS). Acts via MyD88, TIRAP and TRAF6, leading to NF-kappa-B activation, cytokine secretion and the inflammatory response.	12306.7	4.29	ENZYME
THE HUMAN PROTEIN ATLAS	Double PHD fingers 2	Plays an active role in transcriptional regulation by binding modified histones H3 and H4. Is a negative regulator of myeloid differentiation of hematopoietic progenitor cells	12318.1	9.89	TRANSCRIPTION
THE HUMAN PROTEIN ATLAS	SH3 domain binding glutamate rich protein like 2	Predicted to enable SH3 domain binding activity. Located in nuclear membrane and nucleoplasm.	12326.1	6.3	ADHESION
THE HUMAN PROTEIN ATLAS	RNA binding protein, mRNA processing factor	RNA binding protein that mediates the regulation of pre-mRNA alternative splicing (AS) 1, 2. Acts either as activator (FLNB, HSPG2, LIPA1, MYOCD, PTPRF and PPFIBP1) or repressor (TPM1, ACTN1, ITGA7, PIEZO1, LSM14B, MBNL1 and MBML2) of splicing events on specific pre-mRNA targets (By similarity). Together with RNA binding proteins RBFOX2 and MBNL1/2, activates a splicing program associated with di…	12360.1	5.31	ADHESION
THE HUMAN PROTEIN ATLAS	Rhophilin-like protein	Binds specifically to GTP-Rho. May function in a Rho pathway to limit stress fiber formation and/or increase the turnover of F-actin structures in the absence of high levels of RhoA activity.	12440.8	10.59	ADHESION
THE HUMAN PROTEIN ATLAS	NOTCH regulated ankyrin repeat protein	Downstream effector of Notch signaling. Involved in the regulation of liver cancer cells self-renewal 1. Involved in angiogenesis acting downstream of Notch at branch points to regulate vascular density. Proposed to integrate endothelial Notch and Wnt signaling to control stalk cell proliferation and to stablilize new endothelial connections during angiogenesis 2. During somitogenesis involved in…	12492.2	6.82	SIGNAL
THE HUMAN PROTEIN ATLAS	Placenta associated 8	It is anticipated to allow chromatin-binding activity. It is anticipated to be involved in the upregulation of cold-induced thermogenesis and upregulation of transcription by RNA polymerase II. It is anticipated to act before or within several processes, including the differentiation of brown fat cells; the defense response to bacteria; and the response to cold. It is predicted to be found in the…	12506.6	7.87	CELL FUNCTION REGULATOR
THE HUMAN PROTEIN ATLAS	Eukaryotic translation initiation factor 4E binding protein 1	Repressor of translation initiation that regulates EIF4E activity by preventing its assembly into the eIF4F complex: hypophosphorylated form competes with EIF4G1/EIF4G3 and strongly binds to EIF4E, leading to repress translation.	12580	5.32	CELL FUNCTION REGULATOR
THE HUMAN PROTEIN ATLAS	Sperm flagellar 2	Required for correct axoneme development in spermatozoa. Important for normal development of the manchette and sperm head morphology. Essential for male fertility. Plays a role in localization of the intraflagellar transport protein IFT20 to the manchette, suggesting function as an adapter for dynein-mediated protein transport during spermatogenesis 1, 2, 3. Also plays a role in bone growth where…	12630.5	8.79	STRUCTURAL
THE HUMAN PROTEIN ATLAS	Opioid receptor kappa 1	G-protein coupled opioid receptor that functions as a receptor for endogenous alpha-neoendorphins and dynorphins, but has low affinity for beta-endorphins. Also functions as a receptor for various synthetic opioids and for the psychoactive diterpene salvinorin A. Ligand binding causes a conformation change that triggers signaling via guanine nucleotide-binding proteins (G proteins) and modulates …	12752.2	8,86	RECEPTOR
THE HUMAN PROTEIN ATLAS	TNF receptor associated factor 4	Adapter protein with E3 ligase activity that is involved in many diverse biological processes including cell proliferation, migration, differentiation, DNA repair, platelet activation or apoptosis 1, 2, 3, 4. Promotes EGFR-mediated signaling by facilitating the dimerization of EGFR and downstream AKT activation thereby promoting cell proliferation 5. Ubiquitinates SMURF2 through 'Lys-48'-linked u…	12762	9,07	IMMUNOLOGICAL
THE HUMAN PROTEIN ATLAS	Sperm mitochondria associated cysteine rich protein	Involved in sperm motility. Its absence is associated with genetic background dependent male infertility. Infertility may be due to reduced sperm motility in the female reproductive tract and inability to penetrate the oocyte zona pellucida (By similarity).	12767.5	8.49	MOTOR
THE HUMAN PROTEIN ATLAS	Transmembrane protein 243	Predicted to be integral component of membrane.	12918	5,14	STRUCTURAL
THE HUMAN PROTEIN ATLAS	Keratin 7	Blocks interferon-dependent interphase and stimulates DNA synthesis in cells. Involved in the translational regulation of the human papillomavirus type 16 E7 mRNA (HPV16 E7).	12944.5	5,90	INHIBITOR
THE HUMAN PROTEIN ATLAS	WAP four-disulfide core domain 2	Broad range protease inhibitor.	12993	4.69	INHIBITOR
THE HUMAN PROTEIN ATLAS	F-box and leucine rich repeat protein 5	Component of some SCF (SKP1-cullin-F-box) protein ligase complex that plays a central role in iron homeostasis by promoting the ubiquitination and subsequent degradation of IREB2/IRP2.	13006.9	6.83	CELL FUNCTION REGULATOR
THE HUMAN PROTEIN ATLAS	Synuclein gamma	Plays a role in neurofilament network integrity. May be involved in modulating axonal architecture during development and in the adult. In vitro, increases the susceptibility of neurofilament-H to calcium-dependent proteases (By similarity). May also function in modulating the keratin network in skin. Activates the MAPK and Elk-1 signal transduction pathway (By similarity).	13124.5	8.88	CELL FUNCTION REGULATOR
THE HUMAN PROTEIN ATLAS	Sprouty related EVH1 domain containing 2	Negatively regulates Ras signaling pathways and downstream activation of MAP kinases 1, 2. Recruits and translocates NF1 to the cell membrane, thereby enabling NF1-dependent hydrolysis of active GTP-bound Ras to inactive GDP-bound Ras 3. Inhibits fibroblast growth factor (FGF)-induced retinal lens fiber differentiation, probably by inhibiting FGF-mediated phosphorylation of ERK1/2 (By similarity)…	13136.8	8.62	CELL FUNCTION REGULATOR
THE HUMAN PROTEIN ATLAS	Solute carrier family 38 member 10	Facilitates bidirectional transport of amino acids. May act as a glutamate sensor that regulates glutamate-glutamine cycle and mTOR signaling in the brain. The transport mechanism remains to be elucidated.	13187.9	9.85	CELL FUNCTION REGULATOR
UNIPROT	S100A9 [MRP14]	S100A9 is a calcium- and zinc-binding protein which plays a prominent role in the regulation of inflammatory processes and immune response	13261	5.78	ANTIMICROBIAL
THE HUMAN PROTEIN ATLAS	Oxidation resistance 1	May be involved in protection from oxidative damage.	13265.9	4.37	CELL FUNCTION REGULATOR
THE HUMAN PROTEIN ATLAS	C-type lectin domain containing 16A	Regulator of mitophagy through the upstream regulation of the RNF41/NRDP1-PRKN pathway. Mitophagy is a selective form of autophagy necessary for mitochondrial quality control.	13273.6	10.83	CELL FUNCTION REGULATOR
THE HUMAN PROTEIN ATLAS	Biorientation of chromosomes in cell division 1	Required for proper chromosome biorientation through the detection or correction of syntelic attachments in mitotic spindles	13279.7	7.91	CELL CYCLE
THE HUMAN PROTEIN ATLAS	Interferon alpha inducible protein 6	Plays a role in apoptosis, negatively regulating the intrinsinc apoptotic signaling pathway and TNFSF10-induced apoptosis 1, 2, 3. However, it has also been shown to have a pro-apoptotic activity	13298.2	4.94	CELL FUNCTION REGULATOR
PMID: 11323673 DOI: 10.1038/35074106 PMID: 18490781 DOI: 10.4049/jimmunol.180.11.7764 PMID: 29934223 DOI: 10.1016/j.ijmm.2018.06.004 (UNIPROT)	Ig λ chain	Critical for B-cell development.	13385.1	6.7	IMMUNOLOGICAL
THE HUMAN PROTEIN ATLAS	DMRT like family C1B	Transcription, Transcription regulation	13476.5	8.77	TRANSCRIPTION
PMID: 26263539 DOI: 10.1016/j.archoralbio.2015.07.006	α fetoprotein	were implicated to play a pivotal role in chronic inflammatory conditions.	13480.5	5.9	BIOMARKER
THE HUMAN PROTEIN ATLAS	Sonic hedgehog signaling molecule	The C-terminal part of the sonic hedgehog protein precursor displays an autoproteolysis and a cholesterol transferase activity (By similarity). Both activities result in the cleavage of the full-length protein into two parts (ShhN and ShhC) followed by the covalent attachment of a cholesterol moiety to the C-terminal of the newly generated ShhN (By similarity). Both activities occur in the reticu…	13506.1	5.46	METABOLIC
THE HUMAN PROTEIN ATLAS	COP9 signalosome subunit 6	Component of the COP9 signalosome complex (CSN), a complex involved in various cellular and developmental processes	13517.5	5.37	CELL FUNCTION REGULATOR
https://www.ncbi.nlm.nih.gov/gene/28920	Ig κ light chain	Predicted to be involved in immune response. Predicted to be located in extracellular region and plasma membrane. Predicted to be part of immunoglobulin complex. Predicted to be active in extracellular space.	13570.4	8.88	IMMUNOLOGICAL
THE HUMAN PROTEIN ATLAS	Cytochrome c oxidase assembly factor COX18	(UniProt)i Mitochondrial membrane insertase required for the translocation of the C-terminus of cytochrome c oxidase subunit II (MT-CO2/COX2) across the mitochondrial inner membrane.	13573	10.22	CELL FUNCTION REGULATOR
THE HUMAN PROTEIN ATLAS	Brain protein I3	Participates in tumor necrosis factor-alpha (TNF)-induced cell death. May be a target of Wnt/beta-catenin signaling in the liver	13645	8.69	CELL DEATH
THE HUMAN PROTEIN ATLAS	Yip1 domain family member 1	Predicted to enable small GTPase binding activity. Predicted to be involved in vesicle-mediated transport. Located in several cellular components, including Golgi apparatus subcompartment; nucleoplasm; and transport vesicle. [provided by Alliance of Genome Resources, Apr 2022]	13753.4	8.69	ADHESION
UNIPROT	Yip1 domain family member 1	Predicted to enable small GTPase binding activity. Predicted to be involved in vesicle-mediated transport. Located in several cellular components, including Golgi apparatus subcompartment; nucleoplasm; and transport vesicle. [provided by Alliance of Genome Resources, Apr 2022]	13753.4	8.69	CARRIER
THE HUMAN PROTEIN ATLAS	Anoctamin 7	Has calcium-dependent phospholipid scramblase activity; scrambles phosphatidylserine, phosphatidylcholine and galactosylceramide	13761.3	6.19	CARRIER
THE HUMAN PROTEIN ATLAS	POU class 2 homeobox 3	Transcription factor that binds to the octamer motif (5'- ATTTGCAT-3'). Regulated the expression of a number of genes such as SPRR2A or placental lactogen.	13802.3	#REF!	TRANSCRIPTION
THE HUMAN PROTEIN ATLAS	ADP ribosylation factor like GTPase 2 binding protein	(UniProt)i Together with ARL2, plays a role in the nuclear translocation, retention and transcriptional activity of STAT3. May play a role as an effector of ARL2.	13812.5	4.36	BIOMARKER
THE HUMAN PROTEIN ATLAS	C-Maf inducing protein	Plays a role in T-cell signaling pathway. Isoform 2 may play a role in T-helper 2 (Th2) signaling pathway and seems to represent the first proximal signaling protein that links T-cell receptor-mediated signal to the activation of c-Maf Th2 specific factor	13843.9	5.81	TRANSCRIPTION
THE HUMAN PROTEIN ATLAS	Outer mitochondrial membrane lipid metabolism regulator OPA3	May play some role in mitochondrial processes.	13861.9	6.43	CELL FUNCTION REGULATOR
THE HUMAN PROTEIN ATLAS	Novel protein	UNSPECIFIC	13896.4	9.36	UNSPECIFIC
THE HUMAN PROTEIN ATLAS	Solute carrier family 66 member 1	Amino acid transporter that specifically mediates the pH-dependent export of the cationic amino acids arginine, histidine and lysine from lysosomes	13920.4	9.42	CARRIER
THE HUMAN PROTEIN ATLAS	Aladin WD repeat nucleoporin	Plays a role in the normal development of the peripheral and central nervous system	13952	5.83	CARRIER
THE HUMAN PROTEIN ATLAS	Solute carrier family 38 member 7	Symporter that selectively cotransports sodium ions and amino acids, such as L-glutamine and L-asparagine from the lysosome into the cytoplasm and may participates in mTORC1 activation 1, 2. The transport activity requires an acidic lysosomal lumen	14062.8	4.97	CARRIER
THE HUMAN PROTEIN ATLAS	Ring finger protein 175	Predicted to enable ubiquitin protein ligase activity. Predicted to be involved in ubiquitin-dependent ERAD pathway. Predicted to be integral component of membrane. Predicted to be active in Golgi membrane and endoplasmic reticulum membrane.	14072.5	5.23	CARRIER
THE HUMAN PROTEIN ATLAS	Submaxillary gland androgen regulated protein 3A	May play a role in protection or detoxification.	14117.3	10	INHIBITOR
UNIPROT	CD59 glycoprotein	Potent inhibitor of the complement membrane attack complex (MAC) action. Acts by binding to the C8 and/or C9 complements of the assembling MAC, thereby preventing incorporation of the multiple copies of C9 required for complete formation of the osmolytic pore. This inhibitor appears to be species-specific. Involved in signal transduction for T-cell activation complexed to a protein tyrosine kinas…	14177.3	6.02	COAGULATION
THE HUMAN PROTEIN ATLAS	Inositol monophosphatase 1	Responsible for the provision of inositol required for synthesis of phosphatidylinositol and polyphosphoinositides and has been implicated as the pharmacological target for lithium action in brain.	14194.4	5.66	CELL FUNCTION REGULATOR
doi: 10.1002/art.22522	Antiphospholipid immunoglobulin light chain VL-J-C region (fragment)	Antiphospholipid antibodies (aPL) are associated with thrombosis and fetal loss in some patients, and their combined presence is recognized as the antiphospholipid syndrome	14194.8	8.02	IMMUNOLOGICAL
THE HUMAN PROTEIN ATLAS	Poly(A) binding protein interacting protein 2B	Inhibits translation of capped and polyadenylated mRNAs by displacing PABPC1 from the poly(A) tail.	14237.4	4.06	INHIBITOR
THE HUMAN PROTEIN ATLAS	Eukaryotic translation initiation factor 2B subunit gamma	Catalyzes the exchange of eukaryotic initiation factor 2-bound GDP for GTP.	14254.8	6.57	ENZYME
THE HUMAN PROTEIN ATLAS	GrpE like 2, mitochondrial	Essential component of the PAM complex, a complex required for the translocation of transit peptide-containing proteins from the inner membrane into the mitochondrial matrix in an ATP-dependent manner.	14277.4	10.76	CELL FUNCTION REGULATOR
PMCID: PMC1876846 DOI: 10.1016/S0002-9440(10)64971-1 PMID: 24352879 DOI: 10.1182/blood-2013-06-508887	Antileukoproteinase	Modulates the inflammatory and immune responses after bacterial infection, and after infection by the intracellular parasite L.major. Down-regulates responses to bacterial lipopolysaccharide (LPS) (By similarity). Plays a role in regulating the activation of NF-kappa-B and inflammatory responses	14326.1	9.11	ANTIMICROBIAL
THE HUMAN PROTEIN ATLAS	Secretory leukocyte peptidase inhibitor	Acid-stable proteinase inhibitor with strong affinities for trypsin, chymotrypsin, elastase, and cathepsin G 1, 2, 3, 4, 5, 6. Modulates the inflammatory and immune responses after bacterial infection, and after infection by the intracellular parasite L.major. Down-regulates responses to bacterial lipopolysaccharide (LPS) (By similarity). Plays a role in regulating the activation of NF-kappa-B an…	14326.1	9.11	INHIBITOR
PMID: 30485941 DOI: 10.31557/APJCP.2018.19.11.3059	CD44	CD44 is a key marker for the detection of SCC stem cells.	14386	5.32	BIOMARKER
THE HUMAN PROTEIN ATLAS	Serine and arginine rich splicing factor 5	Plays a role in constitutive splicing and can modulate the selection of alternative splice sites.	14437.2	10.1	ADHESION
THE HUMAN PROTEIN ATLAS	Ribosomal protein L23a	Component of the large ribosomal subunit 1, 2. The ribosome is a large ribonucleoprotein complex responsible for the synthesis of proteins in the cell 3, 4. Binds a specific region on the 26S rRNA 5, 6. May promote p53/TP53 degradation possibly through the stimulation of MDM2-mediated TP53 polyubiquitination	14474	10.18	CATALYTIC ACTIVITY
THE HUMAN PROTEIN ATLAS	Agouti signaling protein	Involved in the regulation of melanogenesis. The binding of ASP to MC1R precludes alpha-MSH initiated signaling and thus blocks production of cAMP, leading to a down-regulation of eumelanogenesis (brown/black pigment) and thus increasing synthesis of pheomelanin (yellow/red pigment)	14484.1	9.78	INHIBITOR
THE HUMAN PROTEIN ATLAS	Rho GTPase activating protein 42	May influence blood pressure by functioning as a GTPase-activating protein for RHOA in vascular smooth muscle.	14539	8.65	ACTIVATOR
THE HUMAN PROTEIN ATLAS	Splicing factor 3b subunit 6	Component of the 17S U2 SnRNP complex of the spliceosome, a large ribonucleoprotein complex that removes introns from transcribed pre-mRNAs 1, 2, 3, 4. The 17S U2 SnRNP complex (1) directly participates in early spliceosome assembly and (2) mediates recognition of the intron branch site during pre-mRNA splicing by promoting the selection of the pre-mRNA branch-site adenosine, the nucleophile for …	14584.9	9.41	TRANSCRIPTION
THE HUMAN PROTEIN ATLAS	SAGA complex associated factor 29	Chromatin reader component of some histone acetyltransferase (HAT) SAGA-type complexes like the TFTC-HAT, ATAC or STAGA complexes 1, 2, 3, 4, 5. SGF29 specifically recognizes and binds methylated 'Lys-4' of histone H3 (H3K4me), with a preference for trimethylated form (H3K4me3) 6, 7, 8, 9. In the SAGA-type complexes, SGF29 is required to recruit complexes to H3K4me 10. Involved in the response to…	14619.2	5.71	CELL FUNCTION REGULATOR
THE HUMAN PROTEIN ATLAS	MyoD family inhibitor domain containing	Required to control the activity of various transcription factors through their sequestration in the cytoplasm. Retains nuclear Zic proteins ZIC1, ZIC2 and ZIC3 in the cytoplasm and inhibits their transcriptional activation (By similarity). Modulates the expression from both cellular and viral promoters. Down-regulates Tat-dependent transcription of the human immunodeficiency virus type 1 (HIV-1)…	14635.6	9,00	INHIBITOR
THE HUMAN PROTEIN ATLAS	Oligodendrocytic myelin paranodal and inner loop protein	Central nervous system-specific myelin protein that increase myelin genes expression during oligodendrocyte differentiation. Promotes oligodendrocyte terminal differentiation.	14676.8	6.09	CELL FUNCTION REGULATOR
THE HUMAN PROTEIN ATLAS	XIAP associated factor 1	Seems to function as a negative regulator of members of the IAP (inhibitor of apoptosis protein) family.	14747.1	9.16	CELL DEATH
THE HUMAN PROTEIN ATLAS	TAFA chemokine like family member 3	Plays a role in the regulation of microglia polarization.	14776.1	8.71	CELL FUNCTION REGULATOR
THE HUMAN PROTEIN ATLAS	SHC adaptor protein 1	Signaling adapter that couples activated growth factor receptors to signaling pathways. Participates in a signaling cascade initiated by activated KIT and KITLG/SCF. Isoform p46Shc and isoform p52Shc, once phosphorylated, couple activated receptor tyrosine kinases to Ras via the recruitment of the GRB2/SOS complex and are implicated in the cytoplasmic propagation of mitogenic signals. Isoform p46…	14849.1	10.63	SIGNAL
THE HUMAN PROTEIN ATLAS	SNAP associated protein	Component of the BLOC-1 complex, a complex that is required for normal biogenesis of lysosome-related organelles (LRO), such as platelet dense granules and melanosomes. In concert with the AP-3 complex, the BLOC-1 complex is required to target membrane protein cargos into vesicles assembled at cell bodies for delivery into neurites and nerve terminals. The BLOC-1 complex, in association with SNAR…	14874	9.35	CARRIER
THE HUMAN PROTEIN ATLAS	Tachykinin precursor 1	Tachykinins are active peptides which excite neurons, evoke behavioral responses, are potent vasodilators and secretagogues, and contract (directly or indirectly) many smooth muscles.	15003.1	8.89	MOTOR
THE HUMAN PROTEIN ATLAS	Nescient helix-loop-helix 2	Transcription factor which binds the E box motif 5'- CA[TC][AG]TG-3'. Involved in regulating energy expenditure, body mass, voluntary physical activity, mating behavior and reproductive longevity, acting through the hypothalamic-pituitary-gonadal axis. Acts as a transcriptional activator of target genes, including NDN and PCSK1. May act centrally to regulate function of both white and brown adipo…	15018	7.91	TRANSCRIPTION
STRING	fatty acid-binding protein 4	Lipid transporting protein in adipocytes. It binds to long-chain fatty acids and retinoic acid. It carries long-chain fatty acids and retinoic acid to their corresponding receptors in the nucleus.	15164.4	6.59	CARRIER
THE HUMAN PROTEIN ATLAS	Membrane associated ring-CH-type finger 3	E3 ubiquitin-protein ligase which may be involved in endosomal trafficking. E3 ubiquitin ligases accept ubiquitin from an E2 ubiquitin-conjugating enzyme in the form of a thioester and then directly transfer the ubiquitin to targeted substrates.	15176.2	6,18	CARRIER
THE HUMAN PROTEIN ATLAS	N-acetyltransferase 9 (putative)	N-acetyltransferase that mediates the acetylation of the N-terminal residues of alpha- and beta-tubulin	15217.3	4.39	ENZYME
PMID: 15146193 DOI: 10.1038/ncb1135	Hemoglobin α-chain	Involved in oxygen transport from the lung to the various peripheral tissues.	15257.5	8.72	CARRIER
STRING	Mucin 5B, oligomeric mucus/gel-forming	It is a gel-forming mucin that is believed to contribute to the lubricating and viscoelastic properties of whole saliva and cervical mucus.	15374.5	4.04	SALIVARY PROPERTIES
PMID: 25205458 DOI: 10.1002/jcp.24805	Esophagin	PCNA and esophagin have been implicated in the multistep process of carcinogenesis, but simultaneous characterization of these proteins in the early stages of esophageal neoplastic progression has yet to be undertaken.	15436.7	6.56	BIOMARKER
THE HUMAN PROTEIN ATLAS	Transmembrane protein 60	Predicted to be integral component of membrane.	15500	9,62	STRUCTURAL
THE HUMAN PROTEIN ATLAS	LIM and calponin homology domains 1	Actin stress fibers-associated protein that activates non-muscle myosin IIa. Activates the non-muscle myosin IIa complex by promoting the phosphorylation of its regulatory subunit MRLC/MYL9. Through the activation of non-muscle myosin IIa, positively regulates actin stress fibers assembly and stabilizes focal adhesions. It therefore negatively regulates cell spreading and cell migration.	15551	9,13	MOTOR
THE HUMAN PROTEIN ATLAS	Fatty acid binding protein 12	May play a role in lipid transport.	15564.7	7.71	CARRIER
THE HUMAN PROTEIN ATLAS	Midkine	Secreted protein that functions as cytokine and growth factor and mediates its signal through cell-surface proteoglycan and non-proteoglycan receptors	15585.2	9.84	CELL CYCLE
THE HUMAN PROTEIN ATLAS	Tetratricopeptide repeat and ankyrin repeat containing 1	May be a scaffold component in the postsynaptic density.	15639	7.73	ADHESION
THE HUMAN PROTEIN ATLAS	GSK3B interacting protein	A-kinase anchoring protein for GSK3B and PKA that regulates or facilitates their kinase activity towards their targets	15648.5	4.36	CELL FUNCTION REGULATOR
THE HUMAN PROTEIN ATLAS	Zw10 kinetochore protein	Involved in regulation of membrane traffic between the Golgi and the endoplasmic reticulum (ER); the function is proposed to depend on its association in the interphase NRZ complex which is believed to play a role in SNARE assembly at the ER	15676.1	8.98	CELL CYCLE
THE HUMAN PROTEIN ATLAS	Bone morphogenetic protein 7	Growth factor of the TGF-beta superfamily that plays important role in various biological processes, including embryogenesis, hematopoiesis, neurogenesis and skeletal morphogenesis 1. Initiates the canonical BMP signaling cascade by associating with type I receptor ACVR1 and type II receptor ACVR2A 2, 3. Once all three components are bound together in a complex at the cell surface, ACVR2A phospho…	15680.7	8.47	OSTEOGENESIS
THE HUMAN PROTEIN ATLAS	Zinc finger DHHC-type containing 11	***	15689.6	9.42	ENZYME
THE HUMAN PROTEIN ATLAS	Inner membrane mitochondrial protein	Component of the MICOS complex, a large protein complex of the mitochondrial inner membrane that plays crucial roles in the maintenance of crista junctions, inner membrane architecture, and formation of contact sites to the outer membrane.	15690.1	9.7	CELL FUNCTION REGULATOR
THE HUMAN PROTEIN ATLAS	Cellular retinoic acid binding protein 2	Transports retinoic acid to the nucleus. Regulates the access of retinoic acid to the nuclear retinoic acid receptors.	15693	5.38	CARRIER
THE HUMAN PROTEIN ATLAS	Secreted frizzled related protein 4	Soluble frizzled-related proteins (sFRPS) function as modulators of Wnt signaling through direct interaction with Wnts. They have a role in regulating cell growth and differentiation in specific cell types (By similarity). SFRP4 plays a role in bone morphogenesis. May also act as a regulator of adult uterine morphology and function. May also increase apoptosis during ovulation possibly through mo…	15763.6	8.63	CELL FUNCTION REGULATOR
STRING	Cystatin C	As an inhibitor of cysteine proteinases, this protein is thought to play an important physiological role as a local regulator of this enzymatic activity.	15799.2	9	INHIBITOR
THE HUMAN PROTEIN ATLAS	Calmodulin like 5	Binds calcium. May be involved in terminal differentiation of keratinocytes.	15892.5	4.31	ADHESION
UNIPROT	Hemoglobin β-chain	Involved in oxygen transport from the lung to the various peripheral tissues. LVV-hemorphin-7 potentiates the activity of bradykinin, causing a decrease in blood pressure.	15998.4	6.75	CARRIER
THE HUMAN PROTEIN ATLAS	Chromosome 14 open reading frame 119	Located in cytosol and mitochondrion.	16009.1	4.86	STRUCTURAL
THE HUMAN PROTEIN ATLAS	TIMP metallopeptidase inhibitor 1	Metalloproteinase inhibitor that functions by forming one to one complexes with target metalloproteinases, such as collagenases, and irreversibly inactivates them by binding to their catalytic zinc cofactor.	16057.5	8.4	INHIBITOR
STRING	Cystatin D	An inhibitor of the protein cysteine that possibly plays a protective role against proteinases present in the oral cavity. The order of preference of inhibition is cathepsin S > cathepsin H > cathepsin L > cathepsin B.	16080.5	6.71	INHIBITOR
UNIPROT	PDGF	Growth factor that plays an essential role in the regulation of embryonic development, cell proliferation, cell migration, survival and chemotaxis. Potent mitogen for cells of mesenchymal origin. Required for normal lung alveolar septum formation during embryogenesis, normal development of the gastrointestinal tract, normal development of Leydig cells and spermatogenesis. Required for normal olig…	16108.6	5.61	IMMUNOLOGICAL
THE HUMAN PROTEIN ATLAS	E74 like ETS transcription factor 5	Transcriptionally activator that may play a role in regulating the later stages of keratinocytes terminal differentiation.	16121	4.77	ACTIVATOR
THE HUMAN PROTEIN ATLAS	Thioredoxin domain containing 9	Significantly diminishes the chaperonin TCP1 complex ATPase activity, thus negatively impacts protein folding, including that of actin or tubulin.	16147.5	5,89	INHIBITOR
THE HUMAN PROTEIN ATLAS	Glycerophosphodiester phosphodiesterase domain containing 5	Glycerophosphodiester phosphodiesterase that promotes neurite formation and drives spinal motor neuron differentiation (By similarity).	16151.7	6.56	CELL FUNCTION REGULATOR
THE HUMAN PROTEIN ATLAS	Ripply transcriptional repressor 2	Plays a role in somitogenesis. Required for somite segregation and establishment of rostrocaudal polarity in somites	16210.1	5.28	CELLULAR ORGANIZATION
STRING	Cystatin S	This protein strongly inhibits papain and ficin, partially inhibits stem bromelain and bovine cathepsin C, but does not inhibit porcine cathepsin B or clostripin. Papain is inhibited in a non-competitive manner.	16214.4	4.95	INHIBITOR
THE HUMAN PROTEIN ATLAS	Signal sequence receptor subunit 4	TRAP proteins are part of a complex whose function is to bind calcium to the ER membrane and thereby regulate the retention of ER resident proteins.	16245.5	5.47	ADHESION
THE HUMAN PROTEIN ATLAS	FXYD6-FXYD2 readthrough	produces a fusion protein that shares sequence identity with each individual gene product, while another read-through transcript encodes a protein that has a distinct C-terminus and only shares sequence identity with the upstream locus	16258	8.87	CELL FUNCTION REGULATOR
THE HUMAN PROTEIN ATLAS	Ripply transcriptional repressor 1	Plays a role in somitogenesis. Essential for transcriptional repression of the segmental patterning genes, thus terminating the segmentation program in the presomitic mesoderm, and also required for the maintenance of rostrocaudal polarity in somites	16379.2	4.32	TRANSCRIPTION
THE HUMAN PROTEIN ATLAS	Cystatin SN	Human saliva appears to contain several cysteine proteinase inhibitors that are immunologically related to cystatin S but that differ in their specificity due to amino acid sequence differences. Cystatin SN, with a pI of 7.5, is a much better inhibitor of papain and dipeptidyl peptidase I than is cystatin S, although both inhibit ficin equally well	16387.7	6.73	INHIBITOR
THE HUMAN PROTEIN ATLAS	EF-hand calcium binding domain 8	UNSPECIFIC	16428	5.04	UNSPECIFIC
THE HUMAN PROTEIN ATLAS	Angiotensin II receptor associated protein	Appears to be a negative regulator of type-1 angiotensin II receptor-mediated signaling by regulating receptor internalization as well as mechanism of receptor desensitization such as phosphorylation. Induces also a decrease in cell proliferation and angiotensin II-stimulated transcriptional activity.	16433.9	10.66	CELL FUNCTION REGULATOR
STRING	Cystatin SA	Protease Inhibitor, Thiol Protease Inhibitor	16444.7	4.85	INHIBITOR
THE HUMAN PROTEIN ATLAS	COPI coat complex subunit epsilon	The coatomer is a cytosolic protein complex that binds to dilysine motifs and reversibly associates with Golgi non-clathrin-coated vesicles, which further mediate biosynthetic protein transport from the ER, via the Golgi up to the trans Golgi network.	16452.9	9.85	CELL FUNCTION REGULATOR
PMID: 25531714 DOI: 10.5604/17322693.1133100	Lysozyme	hydrolyzes β-1,4 glycosidic bonds between N-acetylmuramic acid and cell wall peptidoglycan N-acetylglucosamine in Gram-positive and Gram-negative bacteria	16537	9.38	ANTIMICROBIAL
PMID: 28934357 DOI: 10.1371/journal.ppat.1006512	Lysozyme C	Conventional type lysozymes (type c) are also highly cationic and can kill certain bacteria regardless of the hydrolytic activity of PGs.	16537	9.38	ANTIMICROBIAL
UNIPROT	Lymphocyte antigen 75 precursor	Acts as an endocytic receptor to direct captured antigens from the extracellular space to a specialized antigen-processing compartment. Causes reduced proliferation of B-lymphocytes	16537	9.38	IMMUNOLOGICAL
THE HUMAN PROTEIN ATLAS	Ribosomal protein L27a	Component of the large ribosomal subunit 1, 2. The ribosome is a large ribonucleoprotein complex responsible for the synthesis of proteins in the cell	16561.4	11	CATALYTIC ACTIVITY
THE HUMAN PROTEIN ATLAS	Scavenger receptor class B member 1	Receptor for different ligands such as phospholipids, cholesterol ester, lipoproteins, phosphatidylserine and apoptotic cells 1, 2, 3. Receptor for HDL, mediating selective uptake of cholesteryl ether and HDL-dependent cholesterol efflux 4. Also facilitates the flux of free and esterified cholesterol between the cell surface and apoB-containing lipoproteins and modified lipoproteins, although les…	16562.4	9.36	RECEPTOR
PMID: 23981313 DOI: 10.1016/j.jbior.2013.08.001	Polymeric-Ig receptor	Numerous studies indicate that PLC-βs participate in the differentiation and activation of immune cells that control both the innate and adaptive immune systems. The PLC-β3 isoform also interplays with tyrosine kinase-based signaling pathways, to inhibit Stat5 activation by recruiting the protein-tyrosine phosphatase SHP-1, with which PLC-β3 and Stat5 form a multi-molecular signaling platform, na…	16572.5	8.26	ADHESION
PMID: 11015620 DOI: 10.1152/physrev.2000.80.4.1523	Prolactin-inducible protein (prolactin)	Its biological actions are not limited solely to reproduction because it has been shown to control a variety of behaviors and even play a role in homeostasis.	16572.5	8.26	HORMONAL
THE HUMAN PROTEIN ATLAS	Coiled-coil domain containing 149	UNSPECIFIC	16656.1	9.44	UNSPECIFIC
THE HUMAN PROTEIN ATLAS	TSC22 domain family member 4	Transcriptional repressor.	16684.9	4.92	TRANSCRIPTION
THE HUMAN PROTEIN ATLAS	Transmembrane p24 trafficking protein 3	Potential role in vesicular protein trafficking, mainly in the early secretory pathway. Contributes to the coupled localization of TMED2 and TMED10 in the cis-Golgi network.	16690.8	4.87	CARRIER
STRING	Carbonic anhydrase 4	Reversible hydration of carbon dioxide. It can stimulate the sodium/bicarbonate transport activity of SLC4A4 that acts on pH homeostasis. It is essential for the removal of acid overload from the retina and retinal epithelium, and the release of acid in choriocapillarity in the choroid.	16763.2	4.78	METABOLIC
THE HUMAN PROTEIN ATLAS	Inhibitor of nuclear factor kappa B kinase subunit epsilon	Serine/threonine kinase that plays an essential role in regulating inflammatory responses to viral infection, through the activation of the type I IFN, NF-kappa-B and STAT signaling	16802.3	7.73	IMMUNOLOGICAL
STRING	Carbonic anhydrase 2	Essential for bone resorption and osteoclast differentiation (By similarity). Reversible hydration of carbon dioxide. You can hydrate cyanamide into urea. It participates in the regulation of fluid secretion in the anterior chamber of the eye. It contributes to the regulation of intracellular pH in the superior villous epithelium of the duodenum during the absorption of proton-coupled peptides. S…	16805.3	4.78	METABOLIC
THE HUMAN PROTEIN ATLAS	Nudix hydrolase 2	Catalyzes the asymmetric hydrolysis of diadenosine 5',5'''- P1,P4-tetraphosphate (Ap4A) to yield AMP and ATP (By similarity). Exhibits decapping activity towards FAD-capped RNAs and dpCoA-capped RNAs in vitro (By similarity).	16829.2	5.23	ACTIVATOR
THE HUMAN PROTEIN ATLAS	Centriolin	Involved in cell cycle progression and cytokinesis. During the late steps of cytokinesis, anchors exocyst and SNARE complexes at the midbody, thereby allowing secretory vesicle-mediated abscission.	16875.3	5.91	CELL FUNCTION REGULATOR
THE HUMAN PROTEIN ATLAS	Chromosome 1 open reading frame 162	Predicted to be integral component of membrane.	16886.4	9.05	STRUCTURAL
THE HUMAN PROTEIN ATLAS	ADP ribosylation factor like GTPase 8A	Plays a role in lysosome motility (By similarity). In neurons, mediates the anterograde axonal long-range transport of presynaptic lysosome-related vesicles required for presynaptic biogenesis and synaptic function	16903.7	8.57	CARRIER
THE HUMAN PROTEIN ATLAS	Transmembrane p24 trafficking protein 10	Cargo receptor involved in protein vesicular trafficking and quality control in the endoplasmic reticulum (ER) and Golgi 1, 2, 3, 4, 5, 6, 7, 8. The p24 protein family is a group of transmembrane proteins that bind coat protein complex I/COPI and coat protein complex II/COPII involved in vesicular trafficking between the membranes 9. Acts at the lumenal side for incorporation of secretory cargo m…	16904.3	16904,33	RECEPTOR
THE HUMAN PROTEIN ATLAS	Nei like DNA glycosylase 1	Involved in base excision repair of DNA damaged by oxidation or by mutagenic agents. Acts as DNA glycosylase that recognizes and removes damaged bases. Has a preference for oxidized pyrimidines, such as thymine glycol, formamidopyrimidine (Fapy) and 5-hydroxyuracil. Has marginal activity towards 8-oxoguanine.	16954.6	9.1	ENZYME
THE HUMAN PROTEIN ATLAS	LDOC1 regulator of NFKB signaling	May have an important role in the development and/or progression of some cancers.	16968.2	4,11	BIOMARKER
THE HUMAN PROTEIN ATLAS	Anterior gradient 3, protein disulphide isomerase family member	Required for calcium-mediated regulation of ciliary beat frequency and mucociliary clearance in the airway. Might be involved in the regulation of intracellular calcium in tracheal epithelial cells.	16970.4	5.79	CELL FUNCTION REGULATOR
THE HUMAN PROTEIN ATLAS	Proline rich protein HaeIII subfamily 1 (PRH1)	The encoded preproprotein undergoes proteolytic processing to generate one or more mature isoforms before secretion from the parotid and submandibular/sublingual glands	17015.5	4.76	CELL FUNCTION REGULATOR
THE HUMAN PROTEIN ATLAS	Proline rich protein HaeIII subfamily 2 (PRH2)	PRP's act as highly potent inhibitors of crystal growth of calcium phosphates. They provide a protective and reparative environment for dental enamel which is important for the integrity of the teeth.	17015.5	4.76	INHIBITOR
UNIPROT	Basic proline-rich peptide IB5(P-D)	General function(s) of a protein, Peptides IB-9 and P-E are the same peptide.	17016.5	4.63	IMMUNOLOGICAL
UNIPROT	Na, K-ATPase γ subunit	May be involved in forming the receptor site for cardiac glycoside binding or may modulate the transport function of the sodium ATPase.	17016.5	4.63	RECEPTOR
UNIPROT	S-100 protein P	Protein-protein interaction and Gene Ontology analysis further revealed that all genes interacting with S100A7 were mainly involved in the regulation of defense mechanisms against bacteria, mitogen-activated protein kinase (MAPK) pathway activation and receptor for advanced glycation end-products receptor binding. The present findings confirmed that elevation of S100A7 expression in recurrent pte…	17016.5	4.63	TRANSCRIPTION
THE HUMAN PROTEIN ATLAS	Ankyrin repeat domain 10	UNSPECIFIC	17031.2	6.34	UNSPECIFIC
STRING	Fibroblast growth factor receptor 2	Tyrosine protein kinase that acts as a cell surface receptor for fibroblast growth factors and plays an essential role in regulating cell proliferation, differentiation, migration, and apoptosis, as well as regulating embryonic development. It is necessary for normal embryonic patterning, trophoblast function, limb bud development, lung morphogenesis, osteogenesis, and skin development.	17047	8.96	CELL CYCLE
THE HUMAN PROTEIN ATLAS	GLI pathogenesis related 1	This gene encodes a protein with similarity to both the pathogenesis-related protein (PR) superfamily and the cysteine-rich secretory protein (CRISP) family. Increased expression of this gene is associated with myelomocytic differentiation in macrophage and decreased expression of this gene through gene methylation is associated with prostate cancer	17051.5	7.72	CELL FUNCTION REGULATOR
THE HUMAN PROTEIN ATLAS	Serine/threonine kinase 11	Tumor suppressor serine/threonine-protein kinase that controls the activity of AMP-activated protein kinase (AMPK) family members, thereby playing a role in various processes such as cell metabolism, cell polarity, apoptosis and DNA damage response. Acts by phosphorylating the T-loop of AMPK family proteins, thus promoting their activity: phosphorylates PRKAA1, PRKAA2, BRSK1, BRSK2, MARK1, MARK2,…	17133	8.94	METABOLIC
THE HUMAN PROTEIN ATLAS	Interleukin 20	Pro-inflammatory and angiogenic cytokine that may be involved in epidermal function and psoriasis. Angiogenic and proliferative activities are antagonized by IL10. May act through STAT3.	17144	9.16	IMMUNOLOGICAL
STRING	CD14	Coreceptor of bacterial lipopolysaccharide. Together with LBP, it binds to monomeric lipopolysaccharide and delivers it to the LY96/TLR4 complex, thereby mediating the innate immune response to bacterial lipopolysaccharide (LPS) 3, 4, 5. It acts through MyD88, TIRAP and TRAF6, causing the activation of NF-kappa-B, the secretion of cytokines and the inflammatory response 6. It acts as a co-recepto…	17177	4.69	BIOMARKER
PMID: 24661570 DOI: 10.1111/joim.12239	α-1-antitrypsin	Over the past decade, it has been demonstrated that AAT is a broad-spectrum anti-inflammatory, immunomodulatory, anti-infective and tissue-repair molecule.	17242	5.18	IMMUNOLOGICAL
THE HUMAN PROTEIN ATLAS	Zinc finger DHHC-type palmitoyltransferase 15	The protein encoded by this gene belongs to the DHHC palmitoyltransferase family. Mutations in this gene are associated with mental retardatio X-linked type 91 (MRX91). Alternatively spliced transcript variants encoding different isoforms have been found for this gene. [provided by RefSeq, Sep 2009]	17255.4	9.82	CATALYTIC ACTIVITY
UNIPROT	Zinc finger DHHC-type palmitoyltransferase 15	The protein encoded by this gene belongs to the DHHC palmitoyltransferase family. Mutations in this gene are associated with mental retardatio X-linked type 91 (MRX91). Alternatively spliced transcript variants encoding different isoforms have been found for this gene. [provided by RefSeq, Sep 2009]	17255.4	9.82	TRANSCRIPTION
THE HUMAN PROTEIN ATLAS	Transmembrane protein 80	Predicted to be involved in non-motile cilium assembly. Predicted to be located in membrane. Predicted to be integral component of membrane. Predicted to be active in ciliary transition zone.	17292.3	9,25	CELLULAR ORGANIZATION
THE HUMAN PROTEIN ATLAS	B cell receptor associated protein 29	May play a role in anterograde transport of membrane proteins from the endoplasmic reticulum to the Golgi. May be involved in CASP8-mediated apoptosis	17374.2	9.54	CELL DEATH
THE HUMAN PROTEIN ATLAS	Negative regulator of ubiquitin like proteins 1	Specific down-regulator of the NEDD8 conjugation system. Recruits NEDD8, UBD, and their conjugates to the proteasome for degradation. Isoform 1 promotes the degradation of NEDD8 more efficiently than isoform 2	17405.1	9.72	CELL FUNCTION REGULATOR
THE HUMAN PROTEIN ATLAS	Splicing factor 3b subunit 1	Involved in pre-mRNA splicing as a component of the splicing factor SF3B complex, a constituent of the spliceosome	17409.2	4.66	ADHESION
THE HUMAN PROTEIN ATLAS	Solute carrier family 34 member 2	Involved in actively transporting phosphate into cells via Na(+) cotransport.	17455	4.45	CARRIER
THE HUMAN PROTEIN ATLAS	Chromosome 10 open reading frame 53	UNSPECIFIC	17557.3	6.13	UNSPECIFIC
THE HUMAN PROTEIN ATLAS	Microtubule actin crosslinking factor 1	[Isoform 2]: F-actin-binding protein which plays a role in cross-linking actin to other cytoskeletal proteins and also binds to microtubules 1, 2. Plays an important role in ERBB2-dependent stabilization of microtubules at the cell cortex 3. Acts as a positive regulator of Wnt receptor signaling pathway and is involved in the translocation of AXIN1 and its associated complex (composed of APC, CTN…	17579.8	10,50	ADHESION
THE HUMAN PROTEIN ATLAS	Serglycin	Plays a role in formation of mast cell secretory granules and mediates storage of various compounds in secretory vesicles. Required for storage of some proteases in both connective tissue and mucosal mast cells and for storage of granzyme B in T-lymphocytes. Plays a role in localizing neutrophil elastase in azurophil granules of neutrophils. Mediates processing of MMP2. Plays a role in cytotoxic …	17623.7	4.71	STRUCTURAL
THE HUMAN PROTEIN ATLAS	Transmembrane protein 219	Cell death receptor specific for IGFBP3, may mediate caspase-8-dependent apoptosis upon ligand binding.	17646.1	8,97	CELL DEATH
THE HUMAN PROTEIN ATLAS	Nuclear cap binding protein subunit 2 like	Predicted to enable RNA cap binding activity. Predicted to be involved in mRNA splicing, via spliceosome. Predicted to be part of nuclear cap binding activity complex. [provided by Alliance of Genome Resources, Apr 2022]	17685	6,89	ACTIVATOR
THE HUMAN PROTEIN ATLAS	Caldesmon 1	Actin- and myosin-binding protein implicated in the regulation of actomyosin interactions in smooth muscle and nonmuscle cells (could act as a bridge between myosin and actin filaments). Stimulates actin binding of tropomyosin which increases the stabilization of actin filament structure. In muscle tissues, inhibits the actomyosin ATPase by binding to F-actin. This inhibition is attenuated by cal…	17766.7	9.69	MOTOR
THE HUMAN PROTEIN ATLAS	SFT2 domain containing 2	May be involved in fusion of retrograde transport vesicles derived from an endocytic compartment with the Golgi complex.	17779.4	9.34	CARRIER
THE HUMAN PROTEIN ATLAS	Cholinergic receptor nicotinic alpha 5 subunit	After binding acetylcholine, the AChR responds by an extensive change in conformation that affects all subunits and leads to opening of an ion-conducting channel across the plasma membrane.	17809.5	8.73	CELL FUNCTION REGULATOR
THE HUMAN PROTEIN ATLAS	Protein phosphatase 1 regulatory inhibitor subunit 14C	Inhibitor of the PP1 regulatory subunit PPP1CA	17812.8	5.09	INHIBITOR
THE HUMAN PROTEIN ATLAS	TNF alpha induced protein 1	Substrate-specific adapter of a BCR (BTB-CUL3-RBX1) E3 ubiquitin-protein ligase complex involved in regulation of cytoskeleton structure. The BCR(TNFAIP1) E3 ubiquitin ligase complex mediates the ubiquitination of RHOA, leading to its degradation by the proteasome, thereby regulating the actin cytoskeleton and cell migration. Its interaction with RHOB may regulate apoptosis. May enhance the PCNA-…	17821.5	8,43	STRUCTURAL
THE HUMAN PROTEIN ATLAS	TIFA inhibitor	Inhibits TIFA-mediated TRAF6 activation possibly by inducing a conformational change in TIFA.	17887.6	6.96	INHIBITOR
THE HUMAN PROTEIN ATLAS	SH3 and multiple ankyrin repeat domains 1	Seems to be an adapter protein in the postsynaptic density (PSD) of excitatory synapses that interconnects receptors of the postsynaptic membrane including NMDA-type and metabotropic glutamate receptors via complexes with GKAP/PSD-95 and Homer, respectively, and the actin-based cytoskeleton. Plays a role in the structural and functional organization of the dendritic spine and synaptic junction.	17927.3	9.45	STRUCTURAL
THE HUMAN PROTEIN ATLAS	Claudin domain containing 2	Predicted to be integral component of membrane. Predicted to be active in plasma membrane	17984.2	7.56	CELL FUNCTION REGULATOR
THE HUMAN PROTEIN ATLAS	Solute carrier family 35 member C1	Antiporter specific for GDP-l-fucose and depending on the concomitant reverse transport of GMP. Involved in GDP-fucose import from the cytoplasm into the Golgi lumen.	18003.5	8.56	CARRIER
THE HUMAN PROTEIN ATLAS	PCQAP protein	Component of the Mediator complex, a coactivator involved in the regulated transcription of nearly all RNA polymerase II-dependent genes.	18012.5	7.68	RECEPTOR
THE HUMAN PROTEIN ATLAS	BCL2 interacting killer	Accelerates programmed cell death. Association to the apoptosis repressors Bcl-X(L), BHRF1, Bcl-2 or its adenovirus homolog E1B 19k protein suppresses this death-promoting activity. Does not interact with BAX.	18016	4.21	CELL DEATH
THE HUMAN PROTEIN ATLAS	Proline rich protein BstNI subfamily 4	The encoded preproprotein undergoes proteolytic processing to generate one or more mature peptides before secretion from the parotid glands.	18037	10.2	SALIVARY PROPERTIES
THE HUMAN PROTEIN ATLAS	Biorientation of chromosomes in cell division 1 like 2	May play a role in proper chromosome biorientation through the detection or correction of syntelic attachments in mitotic spindles.	18075	5.1	CELL CYCLE
THE HUMAN PROTEIN ATLAS	Solute carrier family 4 member 1 adaptor protein	Predicted to enable mRNA binding activity. Located in nucleoplasm and plasma membrane.	18085.1	4.6	ADHESION
THE HUMAN PROTEIN ATLAS	Cyclin dependent kinase inhibitor 2C	Interacts strongly with CDK6, weakly with CDK4. Inhibits cell growth and proliferation with a correlated dependence on endogenous retinoblastoma protein RB.	18127.4	6.05	INHIBITOR
THE HUMAN PROTEIN ATLAS	Sodium channel epithelial 1 subunit alpha	Sodium permeable non-voltage-sensitive ion channel inhibited by the diuretic amiloride. Mediates the electrodiffusion of the luminal sodium (and water, which follows osmotically) through the apical membrane of epithelial cells. Plays an essential role in electrolyte and blood pressure homeostasis, but also in airway surface liquid homeostasis, which is important for proper clearance of mucus. Con…	18128.7	5.05	STRUCTURAL
UNIPROT	Small proline-rich protein 3	Cross-linked envelope protein of keratinocytes.	18154	8.86	BIOMARKER
STRING	ER81 protein	Transcriptional activator that binds to DNA sequences containing the consensus pentanucleotide 5'-CGGA[AT]-3'.	18163	8.86	BIOMARKER
THE HUMAN PROTEIN ATLAS	IQ motif containing J	UNSPECIFIC	18225.9	9.52	UNSPECIFIC
THE HUMAN PROTEIN ATLAS	Riboflavin kinase	Catalyzes the phosphorylation of riboflavin (vitamin B2) to form flavin-mononucleotide (FMN), hence rate-limiting enzyme in the synthesis of FAD. Essential for TNF-induced reactive oxygen species (ROS) production. Through its interaction with both TNFRSF1A and CYBA, physically and functionally couples TNFRSF1A to NADPH oxidase. TNF-activation of RFK may enhance the incorporation of FAD in NADPH o…	18410.1	7.79	CATALYTIC ACTIVITY
THE HUMAN PROTEIN ATLAS	NK3 homeobox 1	Transcription factor, which binds preferentially the consensus sequence 5'-TAAGT[AG]-3' and can behave as a transcriptional repressor. Plays an important role in normal prostate development, regulating proliferation of glandular epithelium and in the formation of ducts in prostate. Acts as a tumor suppressor controlling prostate carcinogenesis, as shown by the ability to inhibit proliferation and…	18422.9	9.52	BIOMARKER
THE HUMAN PROTEIN ATLAS	Thymocyte nuclear protein 1	Specifically binds 5-hydroxymethylcytosine (5hmC), suggesting that it acts as a specific reader of 5hmC.	18437.9	9,29	CELL DEATH
THE HUMAN PROTEIN ATLAS	Cell division cycle 42	Plasma membrane-associated small GTPase which cycles between an active GTP-bound and an inactive GDP-bound state. In active state binds to a variety of effector proteins to regulate cellular responses. Involved in epithelial cell polarization processes. Regulates the bipolar attachment of spindle microtubules to kinetochores before chromosome congression in metaphase. Regulates cell migration. In…	18498.3	5.71	ENZYME
THE HUMAN PROTEIN ATLAS	Gastrokine 2	This gene may be a tumor suppressor gene, as its expression is markedly decreased in gastric cancer tissues.	18521.3	6.95	SECRETOR
THE HUMAN PROTEIN ATLAS	Interleukin 25	Induces activation of NF-kappa-B and stimulates production of the pro-inflammatory chemokine IL-8. Pro-inflammatory cytokine favoring Th2-type immune responses.	18523.2	8.73	ACTIVATOR
THE HUMAN PROTEIN ATLAS	CD164 molecule like 2	Predicted to be integral component of membrane. Predicted to be active in cytoplasmic vesicle	18534.4	7	CELL FUNCTION REGULATOR
THE HUMAN PROTEIN ATLAS	Chorionic somatomammotropin hormone like 1	May be a novel gestational hormone required to compensate for absence of other members of the GH/CS cluster during gestation.	18572.9	4.93	HORMONAL
THE HUMAN PROTEIN ATLAS	ADP ribosylation factor like GTPase 8B	Small GTPase which cycles between active GTP-bound and inactive GDP-bound states. In its active state, binds to a variety of effector proteins playing a key role in the regulation of lysosomal positioning which is important for nutrient sensing, natural killer cell-mediated cytotoxicity and antigen presentation. Along with its effectors, orchestrates lysosomal transport and fusion	18641.7	5.73	CARRIER
THE HUMAN PROTEIN ATLAS	Protein phosphatase 1 regulatory inhibitor subunit 1B	Inhibitor of protein-phosphatase 1.	18737.8	4.24	INHIBITOR
THE HUMAN PROTEIN ATLAS	Phospholipase A and acyltransferase 1	Exhibits both phospholipase A1/2 and acyltransferase activities 1, 2. Shows phospholipase A1 (PLA1) and A2 (PLA2) activity, catalyzing the calcium-independent release of fatty acids from the sn-1 or sn-2 position of glycerophospholipids 3, 4, 5. Shows O-acyltransferase activity, catalyzing the transfer of a fatty acyl group from glycerophospholipid to the hydroxyl group of lysophospholipid 6.	18750.4	5.37	ENZYME
THE HUMAN PROTEIN ATLAS	Tetratricopeptide repeat domain 31	Enzyme and pathway databases	18817	6,76	ENZYME
THE HUMAN PROTEIN ATLAS	Kelch repeat and BTB domain containing 8	(UniProt)i Substrate-specific adapter of a BCR (BTB-CUL3-RBX1) E3 ubiquitin ligase complex that acts as a regulator of neural crest specification	18826.7	7.65	CELL FUNCTION REGULATOR
THE HUMAN PROTEIN ATLAS	Methyltransferase like 26	UNSPECIFIC	18853.5	7,16	UNSPECIFIC
THE HUMAN PROTEIN ATLAS	Sperm antigen with calponin homology and coiled-coil domains 1 like	Involved in cytokinesis and spindle organization. May play a role in actin cytoskeleton organization and microtubule stabilization and hence required for proper cell adhesion and migration.	18859.2	9.82	CELLULAR ORGANIZATION
THE HUMAN PROTEIN ATLAS	Zymogen granule protein 16B	lays an important role in pancreatic tumor progression and metastasis 1, 2. Promotes pancreatic cancer cells migration and invasion through the TLR4/MyD88/NF-kaapaB signaling pathway, without the involvement of the TLR4/TRIF pathway 3.	18878.6	5.38	SIGNAL
UNIPROT	Zymogen granule protein 16B	lays an important role in pancreatic tumor progression and metastasis 1, 2. Promotes pancreatic cancer cells migration and invasion through the TLR4/MyD88/NF-kaapaB signaling pathway, without the involvement of the TLR4/TRIF pathway 3.	18878.6	5.38	SIGNAL
THE HUMAN PROTEIN ATLAS	Zinc finger protein 576	May be involved in transcriptional regulation.	18890.5	8.79	TRANSCRIPTION
THE HUMAN PROTEIN ATLAS	Synaptotagmin 7	Ca(2+) sensor involved in Ca(2+)-dependent exocytosis of secretory and synaptic vesicles through Ca(2+) and phospholipid binding to the C2 domain (By similarity). Ca(2+) induces binding of the C2-domains to phospholipid membranes and to assembled SNARE-complexes; both actions contribute to triggering exocytosis (By similarity). SYT7 binds Ca(2+) with high affinity and slow kinetics compared to ot…	18894.3	6.31	CELL FUNCTION REGULATOR
STRING	Proline rich protein BstNI subfamily 1	This gene encodes a member of the heterogeneous family of basic human salivary glycoproteins, rich in proline. The encoded preprotein undergoes proteolytic processing to generate one or more mature peptides prior to secretion by the parotid glands.	18962.6	4.29	ENZYME
THE HUMAN PROTEIN ATLAS	Heat shock protein family B (small) member 7	This gene encodes a small heat shock family B member that can heterodimerize with similar heat shock proteins. Defects in this gene are associated with advanced heart failure. In addition, CHAPERONA	19017	6.12	CELL FUNCTION REGULATOR
THE HUMAN PROTEIN ATLAS	CEA cell adhesion molecule 7	This gene encodes a cell surface glycoprotein and member of the carcinoembryonic antigen (CEA) family of proteins.	19030.6	5.66	CELL FUNCTION REGULATOR
THE HUMAN PROTEIN ATLAS	BCL2 like 13	May promote the activation of caspase-3 and apoptosis.	19047.8	5.37	CELL DEATH
THE HUMAN PROTEIN ATLAS	Mitochondrial ribosomal protein L35	Ribonucleoprotein, Ribosomal protein	19211.8	11.8	CELL FUNCTION REGULATOR
THE HUMAN PROTEIN ATLAS	Spermatogenesis associated 19	Essential for sperm motility and male fertility (By similarity). Plays an important role in sperm motility by regulating the organization and function of the mitochondria and is also required for correct sperm midpiece assembly (By similarity).	19213.8	6.44	MOTOR
PROSITE	Lacrimal lipocalin precursor	Could play a role in taste reception. Could be necessary for the concentration and delivery of sapid molecules in the gustatory system. Can bind various ligands, with chemical structures ranging from lipids and retinoids to the macrocyclic antibiotic rifampicin and even to microbial siderophores. Exhibits an extremely wide ligand pocket.	19250	5.38	CARRIER
THE HUMAN PROTEIN ATLAS	Translocase of inner mitochondrial membrane 21	Participates in the translocation of transit peptide-containing proteins across the mitochondrial inner membrane. Also required for assembly of mitochondrial respiratory chain complex I and complex IV as component of the MITRAC (mitochondrial translation regulation assembly intermediate of cytochrome c oxidase complex) complex. Probably shuttles between the presequence translocase and respiratory…	19289.6	10,22	CARRIER
THE HUMAN PROTEIN ATLAS	Proline rich 14 like	Functions in tethering peripheral heterochromatin to the nuclear lamina during interphase, possibly through the interaction with heterochromatin protein CBX5/HP1 alpha. Might play a role in reattaching heterochromatin to the nuclear lamina at mitotic exit (PubMed:24209742). Promotes myoblast differentiation during skeletal myogenesis, possibly by stimulating transcription factor MyoD activity via…	19347.3	4.6	CELL CYCLE
THE HUMAN PROTEIN ATLAS	Interferon gamma	Type II interferon produced by immune cells such as T-cells and NK cells that plays crucial roles in antimicrobial, antiviral, and antitumor responses by activating effector immune cells and enhancing antigen presentation	19348.3	9.5	IMMUNOLOGICAL
THE HUMAN PROTEIN ATLAS	Achaete-scute family bHLH transcription factor 4	Could be a transcriptional regulator involved in skin development.	19384	9.23	TRANSCRIPTION
THE HUMAN PROTEIN ATLAS	CEA cell adhesion molecule 3	Major granulocyte receptor mediating recognition and efficient opsonin-independent phagocytosis of CEACAM-binding microorganisms, including Neissiria, Moxarella and Haemophilus species, thus playing an important role in the clearance of pathogens by the innate immune system.	19402.9	5.11	CELL FUNCTION REGULATOR
THE HUMAN PROTEIN ATLAS	Ankyrin repeat domain 46	This gene encodes a protein containing multiple ankyrin repeats. Ankyrin domains function in protein-protein interactions in a variety of cellular processes. Alternative splicing results in multiple transcript variants	19414.2	5.02	CELL FUNCTION REGULATOR
THE HUMAN PROTEIN ATLAS	Fucosyltransferase 8	Catalyzes the addition of fucose in alpha 1-6 linkage to the first GlcNAc residue, next to the peptide chains in N-glycans.	19519.9	6.34	METABOLIC
STRING	Endosome-lysosome associated apoptosis and autophagy regulator 1	It can protect cells from cell death by inducing cytosolic vacuolization and regulating the autophagy pathway. May play a role in apoptosis and cell proliferation through its interaction with HSPA5	19576.8	4.01	CELL DEATH
THE HUMAN PROTEIN ATLAS	Cathelicidin antimicrobial peptide	Binds to bacterial lipopolysaccharides (LPS) and has antibacterial activity . Acts via neutrophil N-formyl peptide receptors to enhance the release of CXCL2.	19590.7	9.48	ANTIMICROBIAL
THE HUMAN PROTEIN ATLAS	Terminal uridylyl transferase 7	Uridylyltransferase that mediates the terminal uridylation of mRNAs with short (less than 25 nucleotides) poly(A) tails, hence facilitating global mRNA decay 1, 2. Essential for both oocyte maturation and fertility. Through 3' terminal uridylation of mRNA, sculpts, with TUT7, the maternal transcriptome by eliminating transcripts during oocyte growth (By similarity). Involved in microRNA (miRNA)-i…	19595.5	9.11	ACTIVATOR
PMID: 27895095 DOI: 10.1177/1535370216681551	Calprotectin	Calprotectin is a heterodimer made up of two proteins, S100A8 and S100A9, which are produced by monocytes and neutrophils activated in the circulation and in inflamed tissues	19609.9	3.97	BIOMARKER
THE HUMAN PROTEIN ATLAS	Methionine sulfoxide reductase B3	Catalyzes the reduction of free and protein-bound methionine sulfoxide to methionine. Isoform 2 is essential for hearing	19682	6.69	ENZYME
THE HUMAN PROTEIN ATLAS	Sulfatase 1	Exhibits arylsulfatase activity and highly specific endoglucosamine-6-sulfatase activity 1, 2. It can remove sulfate from the C-6 position of glucosamine within specific subregions of intact heparin 3, 4. Diminishes HSPG (heparan sulfate proteoglycans) sulfation, inhibits signaling by heparin-dependent growth factors, diminishes proliferation, and facilitates apoptosis in response to exogenous st…	19694.6	9.32	INHIBITOR
THE HUMAN PROTEIN ATLAS	Sulfotransferase family 1A member 1	Sulfotransferase that utilizes 3'-phospho-5'-adenylyl sulfate (PAPS) as sulfonate donor to catalyze the sulfate conjugation of a wide variety of acceptor molecules bearing a hydroxyl or an amine groupe. Sulfonation increases the water solubility of most compounds, and therefore their renal excretion, but it can also result in bioactivation to form active metabolites. Displays broad substrate spec…	19844	6.3	CATALYTIC ACTIVITY
THE HUMAN PROTEIN ATLAS	Glycosylphosphatidylinositol anchored high density lipoprotein binding protein 1	Mediates the transport of lipoprotein lipase LPL from the basolateral to the apical surface of endothelial cells in capillaries (By similarity).	19850	4.71	TRANSCRIPTION
THE HUMAN PROTEIN ATLAS	2'-5'-oligoadenylate synthetase 1	Interferon-induced, dsRNA-activated antiviral enzyme which plays a critical role in cellular innate antiviral response 1. In addition, it may also play a role in other cellular processes such as apoptosis, cell growth, differentiation and gene regulation. Synthesizes higher oligomers of 2'-5'-oligoadenylates (2-5A) from ATP which then bind to the inactive monomeric form of ribonuclease L (RNase L…	19878.9	7.6	IMMUNOLOGICAL
THE HUMAN PROTEIN ATLAS	Plasmolipin	Appears to be involved in myelination. Could also participate in ion transport events as addition of plasmolipin to lipid bilayers induces the formation of ion channels, which are voltage-dependent and K(+)-selective (By similarity).	19986.6	9.43	STRUCTURAL
THE HUMAN PROTEIN ATLAS	Glycosylated lysosomal membrane protein	Required to protect lysosomal transporter MFSD1 from lysosomal proteolysis and for MFSD1 lysosomal localization.	20020.5	5.48	TRANSCRIPTION
THE HUMAN PROTEIN ATLAS	Spermidine/spermine N1-acetyltransferase 1	Enzyme which catalyzes the acetylation of polyamines 1, 2, 3. Substrate specificity: norspermidine = spermidine >> spermine > N(1)- acetylspermine 4. This highly regulated enzyme allows a fine attenuation of the intracellular concentration of polyamines 5. Also involved in the regulation of polyamine transport out of cells 6. Also acts on 1,3-diaminopropane and 1,5-diaminopentane	20024	5.06	CATALYTIC ACTIVITY
THE HUMAN PROTEIN ATLAS	DMRT like family C1	Transcription, Transcription regulation	20139.2	6.5	TRANSCRIPTION
THE HUMAN PROTEIN ATLAS	Cytidine/uridine monophosphate kinase 1	Catalyzes the phosphorylation of pyrimidine nucleoside monophosphates at the expense of ATP. Plays an important role in de novo pyrimidine nucleotide biosynthesis.	20279.4	8.2	ENZYME
THE HUMAN PROTEIN ATLAS	ATP synthase mitochondrial F1 complex assembly factor 1	May play an essential role for the assembly of the mitochondrial F1-F0 complex.	20281.2	5.05	CELLULAR ORGANIZATION
THE HUMAN PROTEIN ATLAS	Twisted gastrulation BMP signaling modulator 1	May be involved in dorsoventral axis formation. Seems to antagonize BMP signaling by forming ternary complexes with CHRD and BMPs, thereby preventing BMPs from binding to their receptors. In addition to the anti-BMP function, also has pro-BMP activity, partly mediated by cleavage and degradation of CHRD, which releases BMPs from ternary complexes.	20365.4	5.09	CELL CYCLE
THE HUMAN PROTEIN ATLAS	Family with sequence similarity 107 member A	Stress-inducible actin-binding protein that plays a role in synaptic and cognitive functions by modulating actin filamentous (F-actin) dynamics. Mediates polymerization of globular actin to F-actin.	20454.5	9.88	CELL FUNCTION REGULATOR
THE HUMAN PROTEIN ATLAS	CD3g molecule	plays an essential role in adaptive immune response. plays an essential role in the dynamic regulation of TCR expression at the cell surface	20469.5	8.6	IMMUNOLOGICAL
THE HUMAN PROTEIN ATLAS	CD3 gamma subunit of T-cell receptor complex	Part of the TCR-CD3 complex present on T-lymphocyte cell surface that plays an essential role in adaptive immune response. When antigen presenting cells (APCs) activate T-cell receptor (TCR), TCR-mediated signals are transmitted across the cell membrane by the CD3 chains CD3D, CD3E, CD3G and CD3Z. All CD3 chains contain immunoreceptor tyrosine-based activation motifs (ITAMs) in their cytoplasmic …	20469.5	8.6	IMMUNOLOGICAL
PMID: 12055353 DOI: 10.1146/annurev.nutr.22.012502.114457	Ceruloplasmin	Ceruloplasmin is a serum ferroxidase that contains greater than 95% of the copper found in plasma. This protein is a member of the multicopper oxidase family, an evolutionarily conserved group of proteins that utilize copper to couple substrate oxidation with the four-electron reduction of oxygen to water.	20490.5	9.02	CELLULAR ORGANIZATION
THE HUMAN PROTEIN ATLAS	Chromosome 11 open reading frame 91	UNSPECIFIC	20546.6	9.42	UNSPECIFIC
THE HUMAN PROTEIN ATLAS	Secreted frizzled related protein 1	Soluble frizzled-related proteins (sFRPS) function as modulators of Wnt signaling through direct interaction with Wnts. They have a role in regulating cell growth and differentiation in specific cell types. SFRP1 decreases intracellular beta-catenin levels (By similarity). Has antiproliferative effects on vascular cells, in vitro and in vivo, and can induce, in vivo, an angiogenic response. In va…	20594.4	9.84	CELL FUNCTION REGULATOR
THE HUMAN PROTEIN ATLAS	Coiled-coil domain containing 32	Regulates clathrin-mediated endocytsois of cargos such as transferrin probably through the association and modulation of adaptor protein complex 2 (AP-2) 1. Has a role in ciliogenesis (By similarity). Required for proper cephalic and left/right axis development 2.	20655.9	4.42	CELL FUNCTION REGULATOR
THE HUMAN PROTEIN ATLAS	Glyoxalase I	Catalyzes the conversion of hemimercaptal, formed from methylglyoxal and glutathione, to S-lactoylglutathione	20777.7	5.12	ENZYME
UNIPROT	Immunoglobulin α chain C region (IgA)	Constant region of immunoglobulin heavy chains. Immunoglobulins, also known as antibodies, are membrane-bound or secreted glycoproteins produced by B lymphocytes. In the recognition phase of humoral immunity, the membrane-bound immunoglobulins serve as receptors which, upon binding of a specific antigen, trigger the clonal expansion and differentiation of B lymphocytes into immunoglobulins-secret…	20785.6	4.5	IMMUNOLOGICAL
THE HUMAN PROTEIN ATLAS	Basic helix-loop-helix family member a15	Plays a role in controlling the transcriptional activity of MYOD1, ensuring that expanding myoblast populations remain undifferentiated. Repression may occur through muscle-specific E-box occupancy by homodimers. May also negatively regulate bHLH-mediated transcription through an N-terminal repressor domain. Serves as a key regulator of acinar cell function, stability, and identity. Also required…	20818.5	11.26	TRANSCRIPTION
PMID: 23526406 DOI: 10.1002/jbmr.1936	Crk-associated substrate p130Cas	Docking protein which plays a central coordinating role for tyrosine kinase-based signaling related to cell adhesion	21056.8	7.01	ADHESION
THE HUMAN PROTEIN ATLAS	S100-A8 / calprotectin	is a calcium- and zinc-binding protein which plays a prominent role in the regulation of inflammatory processes and immune response. It can induce neutrophil chemotaxis and adhesion. Predominantly found as calprotectin (S100A8/A9) which has a wide plethora of intra- and extracellular functions. The intracellular functions include: facilitating leukocyte arachidonic acid trafficking and metabolism…	21070.5	3.89	BIOMARKER
THE HUMAN PROTEIN ATLAS	S100-A9 / calprotectin	is a calcium- and zinc-binding protein which plays a prominent role in the regulation of inflammatory processes and immune response. It can induce neutrophil chemotaxis, adhesion, can increase the bactericidal activity of neutrophils by promoting phagocytosis via activation of SYK, PI3K/AKT, and ERK1/2 and can induce degranulation of neutrophils by a MAPK-dependent mechanism. Predominantly found …	21070.5	3.89	BIOMARKER
STRING	Carbonic anhydrase 1	Reversible hydration of carbon dioxide. Can hydrates cyanamide to urea.	21142.5	4.67	METABOLIC
STRING	Carbonic anhydrase 11	It has no catalytic activity.	21142.5	4.67	METABOLIC
STRING	Carbonic anhydrase 14	Reversible hydration of carbon dioxide.	21142.5	4.67	METABOLIC
STRING	Carbonic anhydrase 3	Reversible hydration of carbon dioxide.	21142.5	4.67	METABOLIC
THE HUMAN PROTEIN ATLAS	Carbonic anhydrase 5A	Mitochondrial carbonic anhydrase that catalyzes the reversible conversion of carbon dioxide to bicarbonate/HCO3. Mitochondria are impermeable to HCO3, and thus this intramitochondrial carbonic anhydrase is pivotal in providing HCO3 for multiple mitochondrial enzymes that catalyze the formation of essential metabolites of intermediary metabolism in the urea and Krebs cycles They participate in a v…	21213.6	4.67	METABOLIC
THE HUMAN PROTEIN ATLAS	Solute carrier family 26 member 11	Sodium-independent anion exchanger mediating bicarbonate, chloride, sulfate and oxalate transport (By similarity). Exhibits sodium-independent sulfate anion transporter activity that may cooperate with SLC26A2 to mediate DIDS-sensitive sulfate uptake into high endothelial venules endothelial cells (HEVEC) 1. In the kidney, mediates chloride-bicarbonate exchange, facilitating V-ATPase-mediated aci…	21223.9	8.82	CARRIER
THE HUMAN PROTEIN ATLAS	Novel protein	UNSPECIFIC	21244.6	9.79	UNSPECIFIC
STRING	Carbonic anhydrase 5B	They participate in a variety of biological processes, including respiration, calcification, acid-base balance, bone resorption, and the formation of aqueous humor, cerebrospinal fluid, saliva, and gastric acid.	21257.2	4.67	METABOLIC
THE HUMAN PROTEIN ATLAS	Solute carrier family 2 member 9	High-capacity urate transporter, which may play a role in the urate reabsorption by proximal tubules 1, 2, 3, 4, 5. May have a residual high-affinity, low-capacity glucose and fructose transporter activity 6, 7, 8. Transports urate at rates 45-to 60-fold faster than glucose 9. Does not transport galactose 10. May mediate small uptake of adenine but not of other nucleobases	21275	8.76	CARRIER
UNIPROT	Antipneumococcal antibody 3H1 light chain variable region (fragment)	Ig-like domain, Immunoglobulins and major histocompatibility complex proteins	21312.8	8.63	IMMUNOLOGICAL
THE HUMAN PROTEIN ATLAS	Glutamyl-prolyl-tRNA synthetase 1	(UniProt)i Multifunctional protein which is primarily part of the aminoacyl-tRNA synthetase multienzyme complex, also know as multisynthetase complex, that catalyzes the attachment of the cognate amino acid to the corresponding tRNA in a two-step reaction: the amino acid is first activated by ATP to form a covalent intermediate with AMP and is then transferred to the acceptor end of the cognate t…	21319.3	5.95	ENZYME
THE HUMAN PROTEIN ATLAS	Rac family small GTPase 3	Plasma membrane-associated small GTPase which cycles between an active GTP-bound and inactive GDP-bound state. In active state binds to a variety of effector proteins to regulate cellular responses, such as cell spreading and the formation of actin-based protusions including lamellipodia and membrane ruffles. Promotes cell adhesion and spreading on fibrinogen in a CIB1 and alpha-IIb/beta3 integri…	21378.9	8.43	ADHESION
THE HUMAN PROTEIN ATLAS	ADP ribosylation factor like GTPase 11	May play a role in apoptosis. May act as a tumor suppressor.	21390.5	5.96	BIOMARKER
THE HUMAN PROTEIN ATLAS	Rac family small GTPase 2	Plasma membrane-associated small GTPase which cycles between an active GTP-bound and inactive GDP-bound state. In active state binds to a variety of effector proteins to regulate cellular responses, such as secretory processes, phagocytose of apoptotic cells and epithelial cell polarization. Augments the production of reactive oxygen species (ROS) by NADPH oxidase.	21428.8	7.52	ADHESION
THE HUMAN PROTEIN ATLAS	Rac family small GTPase 1	Plasma membrane-associated small GTPase which cycles between active GTP-bound and inactive GDP-bound states. In its active state, binds to a variety of effector proteins to regulate cellular responses such as secretory processes, phagocytosis of apoptotic cells, epithelial cell polarization, neurons adhesion, migration and differentiation, and growth-factor induced formation of membrane ruffles 1…	21450.1	8.77	CELL FUNCTION REGULATOR
THE HUMAN PROTEIN ATLAS	ADP ribosylation factor like GTPase 4Cv	Small GTP-binding protein which cycles between an inactive GDP-bound and an active GTP-bound form, and the rate of cycling is regulated by guanine nucleotide exchange factors (GEF) and GTPase-activating proteins (GAP).	21487	9.17	CARRIER
THE HUMAN PROTEIN ATLAS	REV1 DNA directed polymerase	Deoxycytidyl transferase involved in DNA repair. Transfers a dCMP residue from dCTP to the 3'-end of a DNA primer in a template-dependent reaction. May assist in the first step in the bypass of abasic lesions by the insertion of a nucleotide opposite the lesion. Required for normal induction of mutations by physical and chemical agents.	21491.6	9.02	REPAIRING
THE HUMAN PROTEIN ATLAS	Sulfatase 2	Exhibits arylsulfatase activity and highly specific endoglucosamine-6-sulfatase activity 1, 2, 3. It can remove sulfate from the C-6 position of glucosamine within specific subregions of intact heparin	21499.4	9.56	INHIBITOR
UNIPROT	Integrin α4 chain precursor	catalyzes the random addition of deoxynucleoside 5’-triphosphate to the 3’-end of a DNA initiator. One of the in vivo functions of this enzyme is the addition of nucleotides at the junction (N region) of rearranged Ig heavy chain and T-cell receptor gene segments during the maturation of B- and T-cells	21535.6	9.32	RECEPTOR
UNIPROT	Shisa family member 4	May regulate trafficking and current kinetics of AMPA-type glutamate receptor (AMPAR) at synapses	21540.2	8.21	CELL FUNCTION REGULATOR
THE HUMAN PROTEIN ATLAS	Death associated protein kinase 1	Calcium/calmodulin-dependent serine/threonine kinase involved in multiple cellular signaling pathways that trigger cell survival, apoptosis, and autophagy. Regulates both type I apoptotic and type II autophagic cell deaths signal, depending on the cellular setting.	21582.7	5.63	CELL FUNCTION REGULATOR
THE HUMAN PROTEIN ATLAS	Membrane spanning 4-domains A2	High affinity receptor that binds to the Fc region of immunoglobulins epsilon. Aggregation of FCER1 by multivalent antigens is required for the full mast cell response, including the release of preformed mediators (such as histamine) by degranulation and de novo production of lipid mediators and cytokines. Also mediates the secretion of important lymphokines. Binding of allergen to receptor-bound…	21649.9	5.14	RECEPTOR
THE HUMAN PROTEIN ATLAS	Calcium and integrin binding 1	Calcium-binding protein that plays a role in the regulation of numerous cellular processes, such as cell differentiation, cell division, cell proliferation, cell migration, thrombosis, angiogenesis, cardiac hypertrophy and apoptosis. Involved in bone marrow megakaryocyte differentiation by negatively regulating thrombopoietin-mediated signaling pathway. Participates in the endomitotic cell cycle …	21733.5	4.65	CELL FUNCTION REGULATOR
THE HUMAN PROTEIN ATLAS	Interleukin 32	Cytokine that may play a role in innate and adaptive immune responses. It induces various cytokines such as TNFA/TNF-alpha and IL8. It activates typical cytokine signal pathways of NF-kappa-B and p38 MAPK.	21736.7	5.34	IMMUNOLOGICAL
THE HUMAN PROTEIN ATLAS	ADP ribosylation factor interacting protein 2	Plays a role in constitutive metalloproteinase (MMP) secretion from the trans Golgi network. May have important functions during vesicle biogenesis at certain cargo subdomains, which could be predominantly utilized by secreted MMPs, such as MMP7 and MMP2	21743.3	5.51	CELL FUNCTION REGULATOR
THE HUMAN PROTEIN ATLAS	TRAF family member associated NFKB activator	Adapter protein involved in I-kappa-B-kinase (IKK) regulation which constitutively binds TBK1 and IKBKE playing a role in antiviral innate immunity. Acts as a regulator of TRAF function by maintaining them in a latent state. Blocks TRAF2 binding to LMP1 and inhibits LMP1-mediated NF-kappa-B activation. Negatively regulates NF-kappaB signaling and cell survival upon DNA damage 1. Plays a role as a…	21760.6	5,45	IMMUNOLOGICAL
THE HUMAN PROTEIN ATLAS	Proteasome 26S subunit ubiquitin receptor, non-ATPase 4	Component of the 26S proteasome, a multiprotein complex involved in the ATP-dependent degradation of ubiquitinated proteins. This complex plays a key role in the maintenance of protein homeostasis by removing misfolded or damaged proteins, which could impair cellular functions, and by removing proteins whose functions are no longer required. Therefore, the proteasome participates in numerous cell…	21783	6.59	STRUCTURAL
THE HUMAN PROTEIN ATLAS	Protein kinase cAMP-dependent type I regulatory subunit alpha	Regulatory subunit of the cAMP-dependent protein kinases involved in cAMP signaling in cells	21856.1	5.64	SIGNAL
THE HUMAN PROTEIN ATLAS	DNA primase subunit 1	Catalytic subunit of the DNA primase complex and component of the DNA polymerase alpha complex (also known as the alpha DNA polymerase-primase complex - primosome/replisome) which play an essential role in the initiation of DNA synthesis	21856.1	5.64	TRANSCRIPTION
UNIPROT	Peroxiredoxin-2	Plays a role in cell protection against oxidative stress by detoxifying peroxides and as sensor of hydrogen peroxide-mediated signaling events. Might participate in the signaling cascades of growth factors and tumor necrosis factor-alpha by regulating the intracellular concentrations of H2O2.	21891.9	5.66	METABOLIC
THE HUMAN PROTEIN ATLAS	Glutathione peroxidase 2	Could play a major role in protecting mammals from the toxicity of ingested organic hydroperoxides	21954	7.64	ENZYME
THE HUMAN PROTEIN ATLAS	Cleavage and polyadenylation specific factor 4	Component of the cleavage and polyadenylation specificity factor (CPSF) complex that play a key role in pre-mRNA 3'-end formation, recognizing the AAUAAA signal sequence and interacting with poly(A) polymerase and other factors to bring about cleavage and poly(A) addition.	21957.4	8.92	ADHESION
THE HUMAN PROTEIN ATLAS	RAB1B, member RAS oncogene family	The small GTPases Rab are key regulators of intracellular membrane trafficking, from the formation of transport vesicles to their fusion with membranes 1, 2. Rabs cycle between an inactive GDP-bound form and an active GTP-bound form that is able to recruit to membranes different set of downstream effectors directly responsible for vesicle formation, movement, tethering and fusion 3. Plays a role …	22171.2	5.55	CARRIER
THE HUMAN PROTEIN ATLAS	Sulfotransferase family 1A member 2	Sulfotransferase that utilizes 3'-phospho-5'-adenylyl sulfate (PAPS) as sulfonate donor to catalyze the sulfate conjugation of catecholamines, phenolic drugs and neurotransmitters. Is also responsible for the sulfonation and activation of minoxidil. Mediates the metabolic activation of carcinogenic N-hydroxyarylamines to DNA binding products and could so participate as modulating factor of cancer…	22186.8	7.84	ACTIVATOR
UNIPROT	Twinfilin actin binding protein 1	Significantly diminishes the chaperonin TCP1 complex ATPase activity, thus negatively impacts protein folding, including that of actin or tubulin.	22199.3	5.56	CELL FUNCTION REGULATOR
UNIPROT	Twinfilin actin binding protein 1	Significantly diminishes the chaperonin TCP1 complex ATPase activity, thus negatively impacts protein folding, including that of actin or tubulin.	22199.3	5.56	CELL FUNCTION REGULATOR
THE HUMAN PROTEIN ATLAS	Twinfilin actin binding protein 1	Significantly diminishes the chaperonin TCP1 complex ATPase activity, thus negatively impacts protein folding, including that of actin or tubulin.	22199.3	5.56	INHIBITOR
THE HUMAN PROTEIN ATLAS	Twinfilin actin binding protein 1	Significantly diminishes the chaperonin TCP1 complex ATPase activity, thus negatively impacts protein folding, including that of actin or tubulin.	22199.3	5.56	INHIBITOR
THE HUMAN PROTEIN ATLAS	Interferon lambda 2	Cytokine with antiviral, antitumour and immunomodulatory activities. Plays a critical role in the antiviral host defense, predominantly in the epithelial tissues	22232	8.16	IMMUNOLOGICAL
THE HUMAN PROTEIN ATLAS	ATP synthase peripheral stalk-membrane subunit b	Mitochondrial membrane ATP synthase (F(1)F(0) ATP synthase or Complex V) produces ATP from ADP in the presence of a proton gradient across the membrane which is generated by electron transport complexes of the respiratory chain.	22274.9	9.28	CARRIER
THE HUMAN PROTEIN ATLAS	Nuclear factor I B	Transcriptional activator of GFAP, essential for proper brain development. Recognizes and binds the palindromic sequence 5'-TTGGCNNNNNGCCAA-3' present in viral and cellular promoters and in the origin of replication of adenovirus type 2. These proteins are individually capable of activating transcription and replication	22308.2	9.36	ACTIVATOR
THE HUMAN PROTEIN ATLAS	Abhydrolase domain containing 14B	Catalyzes the deacetylation of lysine residues using CoA as substrate, generating acetyl-CoA and the free amine of protein-lysine residues	22345.7	5.94	ENZYME
THE HUMAN PROTEIN ATLAS	Ectodysplasin A	Cytokine which is involved in epithelial-mesenchymal signaling during morphogenesis of ectodermal organs. Functions as a ligand activating the DEATH-domain containing receptors EDAR and EDA2R 1, 2, 3, 4. May also play a role in cell adhesion (By similarity).	22349.3	8.45	SIGNAL
THE HUMAN PROTEIN ATLAS	CXADR Ig-like cell adhesion molecule	Component of the epithelial apical junction complex that may function as a homophilic cell adhesion molecule and is essential for tight junction integrity. Also involved in transepithelial migration of leukocytes through adhesive interactions with JAML a transmembrane protein of the plasma membrane of leukocytes	22370.2	8.69	RECEPTOR
THE HUMAN PROTEIN ATLAS	Transketolase	Actin cross-linking/gelling protein (By similarity). Involved in calcium interactions and contractile properties of the cell that may contribute to replicative senescence.	22391.5	8.41	CARRIER
UNIPROT	PRG or G1 proline-rich glycoprotein (PRB3)	Acts as a receptor for the Gram-negative bacterium F.nucleatum	22548	5.79	ANTIMICROBIAL
UNIPROT	Tuftelin 1	Involved in the structural organization of the epidermis 1. Involved in the mineralization and structural organization of enamel.	22586.1	5.51	CELLULAR ORGANIZATION
THE HUMAN PROTEIN ATLAS	Tuftelin 1	Involved in the structural organization of the epidermis 1. Involved in the mineralization and structural organization of enamel.	22586.1	5.51	STRUCTURAL
PMID: 21151451 DOI: 10.3390/ijms11114488	Lipocalin-1	Lipocalin-1 has been suggested to be a cysteine proteinase inhibitor and may have a role in controlling inflammatory processes in oral tissues.	22588.1	9.02	ANTIFLAMMATORY
UNIPROT	Liprin, α1	May regulate the disassembly of focal adhesions. May localize receptor-like tyrosine phosphatases type 2A at specific sites on the plasma membrane, possibly regulating their interaction with the extracellular environment and their association with substrates.	22588.1	9.02	BIOMARKER
UNIPROT	Neutrophil gelatinase, chain A	roles in the transport of retinol, olfactory, pheromone signaling and prostaglandin synthesis. Lipocalins have also been linked to the regulation of the immune response and the mediation of cell homeostasis	22588.1	9.02	BIOMARKER
THE HUMAN PROTEIN ATLAS	Paired box 9	Transcription factor required for normal development of thymus, parathyroid glands, ultimobranchial bodies, teeth, skeletal elements of skull and larynx as well as distal limbs.	22642	10.01	CELL CYCLE
THE HUMAN PROTEIN ATLAS	Aldehyde dehydrogenase 1 family member L2	Mitochondrial 10-formyltetrahydrofolate dehydrogenase that catalyzes the NADP(+)-dependent conversion of 10-formyltetrahydrofolate to tetrahydrofolate and carbon dioxide.	22643.3	9.61	METABOLIC
THE HUMAN PROTEIN ATLAS	RAB1A, member RAS oncogene family	The small GTPases Rab are key regulators of intracellular membrane trafficking, from the formation of transport vesicles to their fusion with membranes 1, 2, 3, 4. Rabs cycle between an inactive GDP-bound form and an active GTP-bound form that is able to recruit to membranes different sets of downstream effectors directly responsible for vesicle formation, movement, tethering and fusion 5, 6, 7, …	22677.8	5.93	CARRIER
THE HUMAN PROTEIN ATLAS	PYM homolog 1, exon junction complex associated factor	Key regulator of the exon junction complex (EJC), a multiprotein complex that associates immediately upstream of the exon-exon junction on mRNAs and serves as a positional landmark for the intron exon structure of genes and directs post-transcriptional processes in the cytoplasm such as mRNA export, nonsense-mediated mRNA decay (NMD) or translation. Acts as an EJC disassembly factor, allowing tra…	22704.6	9.43	CELL FUNCTION REGULATOR
THE HUMAN PROTEIN ATLAS	Proline rich 27	Located in extracellular exosome	22719.8	4.82	STRUCTURAL
THE HUMAN PROTEIN ATLAS	Regulator of G protein signaling 16	Regulates G protein-coupled receptor signaling cascades. Inhibits signal transduction by increasing the GTPase activity of G protein alpha subunits, thereby driving them into their inactive GDP-bound form	22767.7	6.32	INHIBITOR
THE HUMAN PROTEIN ATLAS	Activator of HSP90 ATPase activity 1	Acts as a co-chaperone of HSP90AA1 . Activates the ATPase activity of HSP90AA1 leading to increase in its chaperone activity . Competes with the inhibitory co-chaperone FNIP1 for binding to HSP90AA1, thereby providing a reciprocal regulatory mechanism for chaperoning of client proteins	22978.4	6.92	CARRIER
UNIPROT	Ig, chain A	Broad range protease inhibitor.	22990.5	5.93	IMMUNOLOGICAL
UNIPROT	Plasma retinol-binding protein	etinol-binding protein that mediates retinol transport in blood plasma	23010	5.76	CARRIER
THE HUMAN PROTEIN ATLAS	Apolipoprotein B mRNA editing enzyme catalytic subunit 3A	DNA deaminase (cytidine deaminase) with restriction activity against viruses, foreign DNA and mobility of retrotransposons. Exhibits antiviral activity against adeno-associated virus (AAV) and human T-cell leukemia virus type 1 (HTLV-1) and may inhibit the mobility of LTR and non-LTR retrotransposons. Selectively targets single-stranded DNA and can deaminate both methylcytosine and cytosine in fo…	23012	6.34	IMMUNOLOGICAL
THE HUMAN PROTEIN ATLAS	Heparin binding EGF like growth factor	Growth factor that mediates its effects via EGFR, ERBB2 and ERBB4. Required for normal cardiac valve formation and normal heart function. Promotes smooth muscle cell proliferation.	23067	9.47	CELL FUNCTION REGULATOR
PROSITE	General transcription factor IIB C-terminal core domain, chain A	Zinc finger TFIIB-type	23078.9	9.37	TRANSCRIPTION
THE HUMAN PROTEIN ATLAS	Zinc finger AN1-type containing 5	Involved in protein degradation via the ubiquitin-proteasome system. May act by anchoring ubiquitinated proteins to the proteasome. Plays a role in ubiquitin-mediated protein degradation during muscle atrophy.	23132.1	8.86	ADHESION
PMID: 3135937 DOI: 10.1007/BF00712911	Lipocortin I	Plays important roles in the innate immune response as effector of glucocorticoid-mediated responses and regulator of the inflammatory process. Has anti-inflammatory activity	23170.9	8.46	IMMUNOLOGICAL
UNIPROT	Glutathione S-transferase P	Conjugation of reduced glutathione to a wide number of exogenous and endogenous hydrophobic electrophiles. Involved in the formation of glutathione conjugates of both prostaglandin A2 (PGA2) and prostaglandin J2 (PGJ2)	23355.8	5.43	METABOLIC
PMID: 9679544 DOI: 10.1016/s0009-2797(97)00176-2	Glutathione-S-transferase	It has been associated with carcinogenesis and the development of many human tumors, e.g., ovarian and colorectal, and correlates with prognosis	23355.8	5.43	METABOLIC
THE HUMAN PROTEIN ATLAS	Patatin like phospholipase domain containing 7	Lysophospholipase which preferentially deacylates unsaturated lysophosphatidylcholine (C18:1), generating glycerophosphocholine. Also can deacylate, to a lesser extent, lysophosphatidylethanolamine (C18:1), lysophosphatidyl-L-serine (C18:1) and lysophosphatidic acid (C16:0).	23359.5	10.37	CELL FUNCTION REGULATOR
THE HUMAN PROTEIN ATLAS	Transmembrane protein 121B	Candidate gene for the Cat Eye Syndrome (CES), a developmental disorder associated with the duplication of a 2 Mb region of 22q11.2. Duplication usually takes in the form of a surpernumerary bisatellited isodicentric chromosome, resulting in four copies of the region (represents an inv dup22(q11)). CES is characterized clinically by the combination of coloboma of the iris and anal atresia with fi…	23367.2	8,15	BIOMARKER
UNIPROT	Anti-TNF-α antibody light-chain Fab	Major regulator of extracellular matrix organization during tissue remodeling, cts as a catalyst in the formation of hyaluronan-HC oligomers and hyaluronan-rich matrix surrounding the cumulus cell-oocyte complex, a necessary step for oocyte fertilization	23380	7.75	IMMUNOLOGICAL
THE HUMAN PROTEIN ATLAS	Fibroblast growth factor 8	Plays an important role in the regulation of embryonic development, cell proliferation, cell differentiation and cell migration. Required for normal brain, eye, ear and limb development during embryogenesis. Required for normal development of the gonadotropin-releasing hormone (GnRH) neuronal system. Plays a role in neurite outgrowth in hippocampal cells.	23409	10,36	CELL FUNCTION REGULATOR
THE HUMAN PROTEIN ATLAS	Fibroblast growth factor 10	Plays an important role in the regulation of embryonic development, cell proliferation and cell differentiation. Required for normal branching morphogenesis. May play a role in wound healing.	23436	9,61	CELL FUNCTION REGULATOR
THE HUMAN PROTEIN ATLAS	BAF chromatin remodeling complex subunit BCL7C	May play an anti-apoptotic role.	23468.1	5.15	CELL DEATH
PROSITE	Anti entamoeba histolytica immunoglobulin κ light chain	Ig-like domain, Immunoglobulins and major histocompatibility complex proteins	23520.1	7.11	IMMUNOLOGICAL
THE HUMAN PROTEIN ATLAS	ATPase H+ transporting V1 subunit E1	Subunit of the V1 complex of vacuolar(H+)-ATPase (V-ATPase), a multisubunit enzyme composed of a peripheral complex (V1) that hydrolyzes ATP and a membrane integral complex (V0) that translocates protons	23587.4	9.01	CARRIER
THE HUMAN PROTEIN ATLAS	Heart and neural crest derivatives expressed 2	Essential for cardiac morphogenesis, particularly for the formation of the right ventricle and of the aortic arch arteries. Required for vascular development and regulation of angiogenesis, possibly through a VEGF signaling pathway.	23665.8	9.23	TRANSCRIPTION
THE HUMAN PROTEIN ATLAS	Tankyrase	Poly-ADP-ribosyltransferase involved in various processes such as Wnt signaling pathway, telomere length and vesicle trafficking 1, 2, 3, 4, 5, 6, 7, 8, 9. Acts as an activator of the Wnt signaling pathway by mediating poly-ADP-ribosylation (PARsylation) of AXIN1 and AXIN2, 2 key components of the beta-catenin destruction complex: poly-ADP-ribosylated target proteins are recognized by RNF146, whi…	23670.2	8.77	ACTIVATOR
THE HUMAN PROTEIN ATLAS	BMERB domain containing 1	Predicted to act upstream of or within negative regulation of cell motility involved in cerebral cortex radial glia guided migration and negative regulation of microtubule depolymerization. Predicted to be located in microtubule cytoskeleton. [provided by Alliance of Genome Resources, Apr 2022]	23731.6	5.93	CELL FUNCTION REGULATOR
UNIPROT	Peptidyl-prolyl cis-trans isomerase A	Catalyzes the cis-trans isomerization of proline imidic peptide bonds in oligopeptides, Exerts a strong chemotactic effect on leukocytes partly through activation of one of its membrane receptors BSG/CD147, initiating a signaling cascade that culminates in MAPK/ERK activation	23742.5	9.42	RECEPTOR
THE HUMAN PROTEIN ATLAS	TIR domain containing adaptor protein	Adapter involved in TLR2, TLR4 and RAGE signaling pathways in the innate immune response. Acts via IRAK2 and TRAF-6, leading to the activation of NF-kappa-B, MAPK1, MAPK3 and JNK, and resulting in cytokine secretion and the inflammatory response. Positively regulates the production of TNF-alpha (TNF) and interleukin-6 (IL6)	23883.1	7,56	IMMUNOLOGICAL
THE HUMAN PROTEIN ATLAS	RAB14, member RAS oncogene family	The small GTPases Rab are key regulators of intracellular membrane trafficking, from the formation of transport vesicles to their fusion with membranes. Rabs cycle between an inactive GDP-bound form and an active GTP-bound form that is able to recruit to membranes different set of downstream effectors directly responsible for vesicle formation, movement, tethering and fusion 1. Involved in membra…	23897	5.85	CARRIER
THE HUMAN PROTEIN ATLAS	Golgi reassembly stacking protein 1	Plays an important role in assembly and membrane stacking of the Golgi cisternae, and in the reassembly of Golgi stacks after breakdown during mitosis	23906	5.34	CELL FUNCTION REGULATOR
THE HUMAN PROTEIN ATLAS	Fibrillin-2	Fibrillin-2-containing microfibrils regulate the early process of elastic fiber assembly. Regulates osteoblast maturation by controlling TGF-beta bioavailability and calibrating TGF-beta and BMP levels, respectively.	23916.2	5.66	CELLULAR ORGANIZATION
PROSITE	Ig κ light chain VLJ region	Ig-like domain, Immunoglobulins and major histocompatibility complex proteins	23993.9	5.92	IMMUNOLOGICAL
THE HUMAN PROTEIN ATLAS	Platelet derived growth factor subunit A	Growth factor that plays an essential role in the regulation of embryonic development, cell proliferation, cell migration, survival and chemotaxis. Potent mitogen for cells of mesenchymal origin. Required for normal lung alveolar septum formation during embryogenesis, normal development of the gastrointestinal tract, normal development of Leydig cells and spermatogenesis. Required for normal olig…	24042.9	9.52	CELL CYCLE
THE HUMAN PROTEIN ATLAS	TPD52 like 1	This gene encodes a member of a family of proteins that contain coiled-coil domains and may form hetero- or homomers. The encoded protein is involved in cell proliferation and calcium signaling. It also interacts with the mitogen-activated protein kinase kinase kinase 5 (MAP3K5/ASK1) and positively regulates MAP3K5-induced apoptosis. Multiple alternatively spliced transcript variants have been ob…	24207	5,12	SIGNAL
THE HUMAN PROTEIN ATLAS	Solute carrier family 17 member 4	Acts as a membrane potential-dependent organic anion transporter, the transport requires a low concentration of chloride ions 1. Mediates chloride-dependent transport of urate 2. Mediates sodium-independent high affinity transport of thyroid hormones including L-thyroxine (T4) and 3,3',5-triiodo-L-thyronine (T3) 3, 4. Can actively transport inorganic phosphate into cells via Na(+) cotransport	24242.6	9.05	CARRIER
THE HUMAN PROTEIN ATLAS	Iron responsive element binding protein 2	RNA-binding protein that binds to iron-responsive elements (IRES), which are stem-loop structures found in the 5'-UTR of ferritin, and delta aminolevulinic acid synthase mRNAs, and in the 3'-UTR of transferrin receptor mRNA. Binding to the IRE element in ferritin results in the repression of its mRNA translation.	24322	6.42	CELL FUNCTION REGULATOR
THE HUMAN PROTEIN ATLAS	RAB21, member RAS oncogene family	Small GTPase involved in membrane trafficking control 1, 2. During the mitosis of adherent cells, controls the endosomal trafficking of integrins which is required for the successful completion of cytokinesis 3. Regulates integrin internalization and recycling, but does not influence the traffic of endosomally translocated receptors in general (By similarity). As a result, may regulate cell adhes…	24347.6	8.11	CARRIER
THE HUMAN PROTEIN ATLAS	Serpin family B member 4	May act as a protease inhibitor to modulate the host immune response against tumor cells.	24373.6	6.19	INHIBITOR
THE HUMAN PROTEIN ATLAS	Lipase A, lysosomal acid type	Catalyzes the deacylation of cholesteryl ester core lipids of endocytosed low density lipoproteins to generate free fatty acids and cholesterol 1, 2, 3, 4, 5. Hydrolyzes triglycerides (1,2,3-triacylglycerol) and diglycerides (such as 1,2-diacylglycerol and 1,3-diacylglycerol) with preference for the acyl moieties at the sn-1 or sn-3 positions 6, 7.	24380.9	6,59	CATALYTIC ACTIVITY
THE HUMAN PROTEIN ATLAS	Cytochrome P450 family 19 subfamily A member 1	A cytochrome P450 monooxygenase that catalyzes the conversion of C19 androgens, androst-4-ene-3,17-dione (androstenedione) and testosterone to the C18 estrogens, estrone and estradiol, respectively	24517.7	7.05	CELL FUNCTION REGULATOR
THE HUMAN PROTEIN ATLAS	Abhydrolase domain containing 17A, depalmitoylase	Hydrolyzes fatty acids from S-acylated cysteine residues in proteins	24534	9.85	CARRIER
THE HUMAN PROTEIN ATLAS	Synaptogyrin 3	May play a role in regulated exocytosis. May indirectly regulate the activity of the plasma membrane dopamine transporter SLC6A3 and thereby regulate dopamine transport back from the synaptic cleft into the presynaptic terminal.	24555	8.42	CELL FUNCTION REGULATOR
THE HUMAN PROTEIN ATLAS	RAB27B, member RAS oncogene family	In its active state, binds to a variety of effector proteins to regulate homeostasis of late endocytic pathway, including endosomal positioning, maturation and secretion	24607.8	5.35	CELL FUNCTION REGULATOR
THE HUMAN PROTEIN ATLAS	Lysophospholipase 1	Acts as an acyl-protein thioesterase 1, 2. Hydrolyzes fatty acids from S-acylated cysteine residues in proteins such as trimeric G alpha proteins or HRAS 3. Acts as a palmitoyl thioesterase that catalyzes depalmitoylation of proteins, such as ADRB2, KCNMA1 and SQSTM1 4, 5, 6. Acts as a negative regulator of autophagy by mediating palmitoylation of SQSTM1, decreasing affinity between SQSTM1 and AT…	24669.6	6,28	METABOLIC
THE HUMAN PROTEIN ATLAS	Lysine demethylase 8	Bifunctional enzyme that acts both as an endopeptidase and 2-oxoglutarate-dependent monooxygenase	24685.6	5.46	ENZYME
THE HUMAN PROTEIN ATLAS	Tescalcin	Functions as an integral cofactor in cell pH regulation by controlling plasma membrane-type Na. Promotes the induction of hematopoietic stem cell differentiation toward megakaryocytic lineage.	24749.9	4.84	INHIBITOR
PMID: 21833535 DOI: 10.1007/s11010-011-0991-2	Parotid secretory protein	The protein belongs to the palate, lung, and nasal epithelium clone (PLUNC) family of mucosal secretory proteins that are predicted to be structurally similar to lipid-binding and host-defense proteins including bactericidal/permeability-increasing protein and lipopolysaccharide-binding protein.	24752.9	4.87	IMMUNOLOGICAL
THE HUMAN PROTEIN ATLAS	E74 like ETS transcription factor 3	Transcriptional activator that binds and transactivates ETS sequences containing the consensus nucleotide core sequence GGA[AT]. Acts synergistically with POU2F3 to transactivate the SPRR2A promoter and with RUNX1 to transactivate the ANGPT1 promoter	24763	3.98	TRANSCRIPTION
THE HUMAN PROTEIN ATLAS	Chromosome 18 open reading frame 21	UNSPECIFIC	24826.7	10.27	UNSPECIFIC
THE HUMAN PROTEIN ATLAS	Claudin 8	Can associate with other claudins to regulate tight junction structural and functional strand dynamics (By similarity). May coassemble with CLDN4 into tight junction strands containing anion-selective channels that convey paracellular chloride permeability in renal collecting ducts (By similarity) 1. Cannot form tight junction strands on its own 2.	24845.3	9	CELL FUNCTION REGULATOR
THE HUMAN PROTEIN ATLAS	Coiled-coil domain containing 124	Can associate with other claudins to regulate tight junction structural and functional strand dynamics (By similarity). May coassemble with CLDN4 into tight junction strands containing anion-selective channels that convey paracellular chloride permeability in renal collecting ducts (By similarity) 1. Cannot form tight junction strands on its own 2.	24845.3	9	CELL FUNCTION REGULATOR
THE HUMAN PROTEIN ATLAS	Growth hormone 1	Plays an important role in growth control. Its major role in stimulating body growth is to stimulate the liver and other tissues to secrete IGF-1.	24847.3	5.29	HORMONAL
THE HUMAN PROTEIN ATLAS	FAM3 metabolism regulating signaling molecule D	Involved in negative regulation of insulin secretion. Predicted to be located in extracellular region. Predicted to be integral component of membrane. Predicted to be active in extracellular space. [provided by Alliance of Genome Resources, Apr 2022]	24963.4	9,42	CELL FUNCTION REGULATOR
THE HUMAN PROTEIN ATLAS	Chorionic somatomammotropin hormone 2	Produced only during pregnancy and is involved in stimulating lactation, fetal growth and metabolism. Does not interact with GHR but only activates PRLR through zinc-induced dimerization.	24994.4	5.34	HORMONAL
THE HUMAN PROTEIN ATLAS	Nucleoside-triphosphatase, cancer-related	Has nucleotide phosphatase activity towards ATP, GTP, CTP, TTP and UTP. Hydrolyzes nucleoside diphosphates with lower efficiency.	25072.1	9.51	ENZYME
THE HUMAN PROTEIN ATLAS	Chromosome 2 open reading frame 73	UNSPECIFIC	25393.6	8.95	UNSPECIFIC
PMID: 20176268 DOI: 10.1016/j.jaci.2009.09.046 (UNIPROT)	Ig μ chain C region	Constant region of immunoglobulin heavy chains. Immunoglobulins, also known as antibodies, are membrane-bound or secreted glycoproteins produced by B lymphocytes. In the recognition phase of humoral immunity, the membrane-bound immunoglobulins serve as receptors which, upon binding of a specific antigen, trigger the clonal expansion and differentiation of B lymphocytes into immunoglobulins-secret…	25430.3	8.6	IMMUNOLOGICAL
THE HUMAN PROTEIN ATLAS	Proteoglycan 3, pro eosinophil major basic protein 2	Possesses similar cytotoxic and cytostimulatory activities to PRG2/MBP. In vitro, stimulates neutrophil superoxide production and IL8 release, and histamine and leukotriene C4 release from basophils.	25446.5	4.76	STRUCTURAL
THE HUMAN PROTEIN ATLAS	Triggering receptor expressed on myeloid cells 2	Forms a receptor signaling complex with TYROBP which mediates signaling and cell activation following ligand binding 1. Acts as a receptor for amyloid-beta protein 42, a cleavage product of the amyloid-beta precursor protein APP, and mediates its uptake and degradation by microglia 2, 3. Binding to amyloid-beta 42 mediates microglial activation, proliferation, migration, apoptosis and expression …	25447	5,84	SIGNAL
PMID: 18178150 DOI: 10.1016/j.bbrc.2007.12.163	Cathepsin D	Cathepsin E is a major intracellular aspartic protease which is predominantly present in the cells of immune system and is frequently implicated in antigen processing via the MHC class II pathway.	25500.7	6.31	ENZYME
THE HUMAN PROTEIN ATLAS	Cathepsin L	Thiol protease important for the overall degradation of proteins in lysosomes (Probable). Plays a critical for normal cellular functions such as general protein turnover, antigen processing and bone remodeling.	25500.7	6.31	CELL FUNCTION REGULATOR
THE HUMAN PROTEIN ATLAS	DnaJ heat shock protein family (Hsp40) member B9	Co-chaperone for Hsp70 protein HSPA5/BiP that acts as a key repressor of the ERN1/IRE1-mediated unfolded protein response (UPR) (By similarity). J domain-containing co-chaperones stimulate the ATPase activity of Hsp70 proteins and are required for efficient substrate recognition by Hsp70 proteins	25518.3	8.37	CELL FUNCTION REGULATOR
THE HUMAN PROTEIN ATLAS	Transmembrane protein 63B	Mechanosensitive cation channel with low conductance and high activation threshold. Essential for the baby's first breath and respiration throughout life. Upon lung inflation conducts cation currents in alveolar type 1 and 2 cells triggering lamellar body exocytosis and surfactant secretion into airspace (By similarity) 1, 2. Osmosensitive cation channel preferentially activated by hypotonic stre…	25554.4	7,72	STRUCTURAL
THE HUMAN PROTEIN ATLAS	Doublecortin domain containing 2	Protein that plays a role in the inhibition of canonical Wnt signaling pathway. May be involved in neuronal migration during development of the cerebral neocortex (By similarity). Involved in the control of ciliogenesis and ciliary length	25581.8	4.45	CELL FUNCTION REGULATOR
THE HUMAN PROTEIN ATLAS	Caspase recruitment domain family member 19	Plays a role in inhibiting the effects of BCL10-induced activation of NF-kappa-B. May inhibit the phosphorylation of BCL10 in a CARD-dependent manner.	25589.5	9.43	INHIBITOR
THE HUMAN PROTEIN ATLAS	LSM4 homolog, U6 small nuclear RNA and mRNA degradation associated	Plays a role in pre-mRNA splicing as component of the U4/U6-U5 tri-snRNP complex that is involved in spliceosome assembly, and as component of the precatalytic spliceosome (spliceosome B complex) 1. The heptameric LSM2-8 complex binds specifically to the 3'-terminal U-tract of U6 snRNA 2.	25620.3	10,19	TRANSCRIPTION
THE HUMAN PROTEIN ATLAS	Neurogenin 1	Acts as a transcriptional regulator. Involved in the initiation of neuronal differentiation. Activates transcription by binding to the E box (5'-CANNTG-3'). Associates with chromatin to enhancer regulatory elements in genes encoding key transcriptional regulators of neurogenesis (By similarity).	25630.7	6,90	TRANSCRIPTION
UNIPROT	CD63	Functions as cell surface receptor for TIMP1 and plays a role in the activation of cellular signaling cascades. Plays a role in the activation of ITGB1 and integrin signaling, leading to the activation of AKT, FAK/PTK2 and MAP kinases. Promotes cell survival, reorganization of the actin cytoskeleton, cell adhesion, spreading and migration, via its role in the activation of AKT and FAK/PTK2.	25636.6	8.14	RECEPTOR
THE HUMAN PROTEIN ATLAS	Tumor necrosis factor	Cytokine that binds to TNFRSF1A/TNFR1 and TNFRSF1B/TNFBR. It is mainly secreted by macrophages and can induce cell death of certain tumor cell lines.	25644.4	6.44	IMMUNOLOGICAL
THE HUMAN PROTEIN ATLAS	Family with sequence similarity 91 member A1	As component of the WDR11 complex acts together with TBC1D23 to facilitate the golgin-mediated capture of vesicles generated using AP-1.	25834.8	9.02	CELL FUNCTION REGULATOR
THE HUMAN PROTEIN ATLAS	G protein subunit beta 2	Guanine nucleotide-binding proteins (G proteins) are involved as a modulator or transducer in various transmembrane signaling systems. The beta and gamma chains are required for the GTPase activity, for replacement of GDP by GTP, and for G protein-effector interaction.	25931	4.62	SIGNAL
THE HUMAN PROTEIN ATLAS	G protein subunit beta 1	Guanine nucleotide-binding proteins (G proteins) are involved as a modulator or transducer in various transmembrane signaling systems. The beta and gamma chains are required for the GTPase activity, for replacement of GDP by GTP, and for G protein-effector interaction.	25934.9	4.63	TRANSCRIPTION
THE HUMAN PROTEIN ATLAS	Nicotinamide riboside kinase 2	Catalyzes the phosphorylation of nicotinamide riboside (NR) and nicotinic acid riboside (NaR) to form nicotinamide mononucleotide (NMN) and nicotinic acid mononucleotide (NaMN). Reduces laminin matrix deposition and cell adhesion to laminin, but not to fibronectin. Involved in the regulation of PXN at the protein level and of PXN tyrosine phosphorylation. May play a role in the regulation of term…	26045.5	5.77	ADHESION
THE HUMAN PROTEIN ATLAS	Polysaccharide biosynthesis domain containing 1	UNSPECIFIC	26056.8	4.72	UNSPECIFIC
THE HUMAN PROTEIN ATLAS	Mesoderm development LRP chaperone	Chaperone specifically assisting the folding of beta-propeller/EGF modules within the family of low-density lipoprotein receptors (LDLRs) 1. Acts as a modulator of the Wnt pathway through chaperoning the coreceptors of the canonical Wnt pathway, LRP5 and LRP6, to the plasma membrane 2. Essential for specification of embryonic polarity and mesoderm induction. Plays an essential role in neuromuscul…	26076.6	7,60	CARRIER
UNIPROT	Galectin-3	Galactose-specific lectin which binds IgE. May mediate with the alpha-3, beta-1 integrin the stimulation by CSPG4 of endothelial cells migration. Together with DMBT1, required for terminal differentiation of columnar epithelial cells during early embryogenesis	26152.3	8.58	ADHESION
THE HUMAN PROTEIN ATLAS	Dual specificity phosphatase 15	May dephosphorylate MAPK13, ATF2, ERBB3, PDGFRB and SNX6	26166.3	9.55	CELL FUNCTION REGULATOR
THE HUMAN PROTEIN ATLAS	Potassium channel tetramerization domain containing 14	Predicted to be involved in protein homooligomerization	26188.2	6.91	CELL FUNCTION REGULATOR
THE HUMAN PROTEIN ATLAS	Chloride nucleotide-sensitive channel 1A	Involved in both the assembly of spliceosomal snRNPs and the methylation of Sm proteins 1, 2, 3, 4. Chaperone that regulates the assembly of spliceosomal U1, U2, U4 and U5 small nuclear ribonucleoproteins (snRNPs), the building blocks of the spliceosome, and thereby plays an important role in the splicing of cellular pre-mRNAs 5, 6. Most spliceosomal snRNPs contain a common set of Sm proteins SNR…	26215.3	3.97	TRANSCRIPTION
https://www.ncbi.nlm.nih.gov/gene/10103	Tetraspanin-1	The protein encoded by this gene is a member of the transmembrane 4 superfamily, also known as the tetraspanin family. Most of these members are cell-surface proteins that are characterized by the presence of four hydrophobic domains. The proteins mediate signal transduction events that play a role in the regulation of cell development, activation, growth and motility.	26300.9	5.12	CELL FUNCTION REGULATOR
THE HUMAN PROTEIN ATLAS	Chromosome 9 open reading frame 152	UNSPECIFIC	26313.8	8.94	UNSPECIFIC
THE HUMAN PROTEIN ATLAS	SH2B adaptor protein 2	Adapter protein for several members of the tyrosine kinase receptor family. Involved in multiple signaling pathways. May be involved in coupling from immunoreceptor to Ras signaling. Acts as a negative regulator of cytokine signaling in collaboration with CBL. Binds to EPOR and suppresses EPO-induced STAT5 activation, possibly through a masking effect on STAT5 docking sites in EPOR. Suppresses PD…	26519.1	9.41	SIGNAL
THE HUMAN PROTEIN ATLAS	Thymopoietin	May be involved in the structural organization of the nucleus and in the post-mitotic nuclear assembly. Plays an important role, together with LMNA, in the nuclear anchorage of RB1. [P42166] May help direct the assembly of the nuclear lamina and thereby help maintain the structural organization of the nuclear envelope. Possible receptor for attachment of lamin filaments to the inner nuclear membr…	26566	9,23	CELLULAR ORGANIZATION
THE HUMAN PROTEIN ATLAS	RAB15 effector protein	Regulates transferrin receptor recycling from the endocytic recycling compartment.	26571	6.89	CELL FUNCTION REGULATOR
THE HUMAN PROTEIN ATLAS	RAB33A, member RAS oncogene family	The protein encoded by this gene belongs to the small GTPase superfamily, Rab family. It is GTP-binding protein and may be involved in vesicle transport	26592.7	8.07	ADHESION
THE HUMAN PROTEIN ATLAS	Derlin 3	Functional component of endoplasmic reticulum-associated degradation (ERAD) for misfolded lumenal glycoproteins, but not that of misfolded nonglycoproteins. May act by forming a channel that allows the retrotranslocation of misfolded glycoproteins into the cytosol where they are ubiquitinated and degraded by the proteasome. May mediate the interaction between VCP and the misfolded glycoproteins 1…	26605.4	9.75	STRUCTURAL
PMID: 20176268 DOI: 10.1016/j.jaci.2009.09.046 (UNIPROT)	Triosephosphate isomerase	Thyroid hormone-binding protein. Probably transports thyroxine from the bloodstream to the brain.	26669.5	6.45	CARRIER
THE HUMAN PROTEIN ATLAS	Dendritic cell associated nuclear protein 1	Binds with and transactivates the corticotropin-releasing hormone (CRH) promoter.	26703.9	9.97	ACTIVATOR
THE HUMAN PROTEIN ATLAS	Molécula CD96 Cell division cycle 34, ubiqiutin conjugating enzyme	Accepts ubiquitin from the E1 complex and catalyzes its covalent attachment to other proteins.	26736.8	4.41	ENZYME
UNIPROT	Zinc finger protein 575	Predicted to enable DNA-binding transcription factor activity, RNA polymerase II-specific and RNA polymerase II cis-regulatory region sequence-specific DNA binding activity. Predicted to be involved in regulation of transcription by RNA polymerase II. Predicted to be located in nucleus. [provided by Alliance of Genome Resources, Apr 2022]	26793.3	9.83	TRANSCRIPTION
THE HUMAN PROTEIN ATLAS	Zinc finger protein 575	Predicted to enable DNA-binding transcription factor activity, RNA polymerase II-specific and RNA polymerase II cis-regulatory region sequence-specific DNA binding activity. Predicted to be involved in regulation of transcription by RNA polymerase II. Predicted to be located in nucleus. [provided by Alliance of Genome Resources, Apr 2022]	26793.3	9.83	TRANSCRIPTION
THE HUMAN PROTEIN ATLAS	Cellular communication network factor 5	May play an important role in modulating bone turnover. Promotes the adhesion of osteoblast cells and inhibits the binding of fibrinogen to integrin receptors. In addition, inhibits osteocalcin production	26825	8.32	ADHESION
THE HUMAN PROTEIN ATLAS	Pyridoxal kinase	Catalyzes the phosphorylation of the dietary vitamin B6 vitamers pyridoxal (PL), pyridoxine (PN) and pyridoxamine (PM) to form pyridoxal 5'-phosphate (PLP), pyridoxine 5'-phosphate (PNP) and pyridoxamine 5'-phosphate (PMP), respectively 1, 2, 3, 4, 5 (Probable). PLP is the active form of vitamin B6, and acts as a cofactor for over 140 different enzymatic reactions	26827.1	6.08	ENZYME
THE HUMAN PROTEIN ATLAS	BPI fold containing family A member 2	Has strong antibacterial activity against P. aeruginosa.	27011.4	5.35	ANTIMICROBIAL
THE HUMAN PROTEIN ATLAS	Family with sequence similarity 204 member A	UNSPECIFIC	27021.2	7.69	UNSPECIFIC
THE HUMAN PROTEIN ATLAS	RNA binding motif single stranded interacting protein 3	Binds poly(A) and poly(U) oligoribonucleotides.	27031.5	8.76	ADHESION
THE HUMAN PROTEIN ATLAS	CHD1 helical C-terminal domain containing 1	May play a role in regulation of apoptosis.	27182.3	9.65	CELL DEATH
THE HUMAN PROTEIN ATLAS	Opiorphin prepropeptide	Opiorphin is an endogenous inhibitor of neprilysin and aminopeptidase N. Has a potent analgesic effect when administered to rats by intravenous injection.	27216.5	10.42	INHIBITOR
THE HUMAN PROTEIN ATLAS	Cysteine rich secretory protein 2	May regulate some ion channels' activity and therebye regulate calcium fluxes during sperm capacitation.	27258.9	6.09	CELL FUNCTION REGULATOR
THE HUMAN PROTEIN ATLAS	G protein subunit beta 4	Guanine nucleotide-binding proteins (G proteins) are involved as a modulator or transducer in various transmembrane signaling systems. The beta and gamma chains are required for the GTPase activity, for replacement of GDP by GTP, and for G protein-effector interaction.	27264.7	6.58	TRANSCRIPTION
PMID: 31369555 DOI: 10.1371/journal.pone.0203234	Kallikrein 1	Kallikrein-related peptidases (KLKs) have a distinct domain structure and exist as a family of 15 genes which are differentially expressed in many tissues and in the central nervous system. They are present in plasma, lymph, urine, saliva, pancreatic juices, and other body fluids where they catalyze the proteolysis of several human proteins.	27465.7	8.8	BIOMARKER
THE HUMAN PROTEIN ATLAS	Kallikrein related peptidase 11	Possible multifunctional protease. Efficiently cleaves 'bz-Phe-Arg-4-methylcoumaryl-7-amide', a kallikrein substrate, and weakly cleaves other substrates for kallikrein and trypsin. Cleaves synthetic peptides after arginine but not lysine residues.	27465.7	8,80	CELLULAR ORGANIZATION
PMID: 1830053 DOI: 10.1083/jcb.114.2.241	Kallikrein 1	Glandular kallikreins cleave Met-Lys and Arg-Ser bonds in kininogen to release Lys-bradykinin.	27465.8	8.8	BIOMARKER
THE HUMAN PROTEIN ATLAS	3-hydroxyacyl-CoA dehydratase 4	Catalyzes the third of the four reactions of the long-chain fatty acids elongation cycle	27489.8	8.76	ENZYME
PMID: 21712618 DOI: 10.2334/josnusd.53.147	Prolactin-inducible protein	The main player in this immune system is the polymeric immunoglobulins (pIgs), in particular dimeric IgA (dIgA). To exert its protective effect, dIgA produced in the lamina propria must be transported to the intestinal lumen across epithelial cells. This process is called transcytosis and is mediated by polymeric immunoglobulin receptor (pIgR), which is exclusively produced by intestinal epitheli…	27630.3	8.09	IMMUNOLOGICAL
THE HUMAN PROTEIN ATLAS	C1q and TNF related 8	May play a role as ligand of RXFP1.	27684.9	9.70	CELL FUNCTION REGULATOR
STRING	Cytokeratin 6A	Epidermis-specific type I keratin involved in wound healing. Involved in the activation of follicular keratinocytes after wounding, while it does not play a major role in keratinocyte proliferation or migration. Participates in the regulation of epithelial migration by inhibiting the activity of SRC during wound repair.	27774.1	4.68	IMMUNOLOGICAL
UNIPROT	Statherin precursor	May act as a papain-like cysteine protease inhibitor to modulate the host immune response against tumor cells. Also functions as an inhibitor of UV-induced apoptosis via suppression of the activity of c-Jun NH2-terminal kinase (JNK1).	27774.1	4.68	IMMUNOLOGICAL
THE HUMAN PROTEIN ATLAS	Forkhead box K2	Transcriptional regulator involved in different processes such as glucose metabolism, aerobic glycolysis and autophagy (By similarity).	27786.6	9.38	TRANSCRIPTION
STRING	Aquaporin 1 (Colton blood group)	It forms a specific channel for water that provides the plasma membranes of red blood cells and proximal tubules of the kidney with high water permeability, thus allowing water to move in the direction of an osmotic gradient	27803.7	4.16	WATER CHANNEL
THE HUMAN PROTEIN ATLAS	Transmembrane protein 106C	Predicted to be located in endoplasmic reticulum membrane. Predicted to be integral component of membrane.	27875	6,30	STRUCTURAL
THE HUMAN PROTEIN ATLAS	Homeobox D4	Sequence-specific transcription factor which is part of a developmental regulatory system that provides cells with specific positional identities on the anterior-posterior axis.	27885.3	9.44	TRANSCRIPTION
THE HUMAN PROTEIN ATLAS	Tumor suppressing subtransferable candidate 4	Protein associated with the U5 snRNP, during its maturation and its post-splicing recycling and which is required for spliceosomal tri-snRNP complex assembly in the nucleus 1, 2. Has a molecular sequestering activity and transiently hinders SNRNP200 binding sites for constitutive splicing factors that intervene later during the assembly of the spliceosome and splicing 3. Together with its molecul…	27894.9	6.56	INHIBITOR
UNIPROT	Tumor suppressing subtransferable candidate 4	Protein associated with the U5 snRNP, during its maturation and its post-splicing recycling and which is required for spliceosomal tri-snRNP complex assembly in the nucleus 1, 2. Has a molecular sequestering activity and transiently hinders SNRNP200 binding sites for constitutive splicing factors that intervene later during the assembly of the spliceosome and splicing 3. Together with its molecul…	27894.9	6.56	INHIBITOR
THE HUMAN PROTEIN ATLAS	Tandem C2 domains, nuclear	Predicted to be active in nucleus	27914.5	9.51	ACTIVATOR
THE HUMAN PROTEIN ATLAS	RNA binding motif protein 41	May bind RNA.	28078.2	8.92	TRANSCRIPTION
THE HUMAN PROTEIN ATLAS	Regulatory factor X associated ankyrin containing protein	Activates transcription from class II MHC promoters. Activation requires the activity of the MHC class II transactivator/CIITA. May regulate other genes in the cell. RFX binds the X1 box of MHC-II promoters 1, 2, 3. May also potentiate the activation of RAF1 (By similarity).	28102.3	4.42	ACTIVATOR
THE HUMAN PROTEIN ATLAS	Intermediate filament family orphan 1	(UniProt)i Nuclear matrix protein involved in the immobilization of broken DNA ends and the suppression of chromosome translocation during DNA double-strand breaks (DSBs)	28128.2	10.3	CELL FUNCTION REGULATOR
THE HUMAN PROTEIN ATLAS	Glutamate-cysteine ligase modifier subunit	Glutamate-cysteine ligase, also known as gamma-glutamylcysteine synthetase, is the first rate limiting enzyme of glutathione synthesis.	28135.1	5.74	ENZYME
STRING	Fatty acid binding protein 12	It can play a role in lipid transport.	28143.4	3.74	CARRIER
THE HUMAN PROTEIN ATLAS	FAM3 metabolism regulating signaling molecule B	Induces apoptosis of alpha and beta cells in a dose- and time-dependent manner.	28282.3	8.96	CELL DEATH
THE HUMAN PROTEIN ATLAS	Complement component 4 binding protein beta	Controls the classical pathway of complement activation. It binds as a cofactor to C3b/C4b inactivator (C3bINA), which then hydrolyzes the complement fragment C4b. It also accelerates the degradation of the C4bC2a complex (C3 convertase) by dissociating the complement fragment C2a. It also interacts with anticoagulant protein S and with serum amyloid P component. The beta chain binds protein S.	28357.4	5.05	CELL FUNCTION REGULATOR
UNIPROT	PRB1L protein (fragment)	General function(s) of a protein	28451.3	5.19	TRANSCRIPTION
THE HUMAN PROTEIN ATLAS	Abhydrolase domain containing 11	Catalyzes the hydrolysis of diacylglycerol in vitro and may function as a key regulator in lipid metabolism, namely by regulating the intracellular levels of diacylglycerol	28472.8	10.08	ENZYME
THE HUMAN PROTEIN ATLAS	Major histocompatibility complex, class II, DR alpha	In the tumor microenvironment, presents antigenic peptides that are primarily generated in tumor-resident APCs likely via phagocytosis of apoptotic tumor cells or macropinocytosis of secreted tumor proteins	28606.9	4.91	IMMUNOLOGICAL
THE HUMAN PROTEIN ATLAS	MYC associated zinc finger protein	ranscriptional regulator, potentially with dual roles in transcription initiation and termination.	28620.8	9,37	TRANSCRIPTION
PMID: 20176268 DOI: 10.1016/j.jaci.2009.09.046 (UNIPROT)	Transcription initiation factor IIB	Functions as a transcription factor during endoplasmic reticulum (ER) stress by regulating the unfolded protein response (UPR). Required for cardiac myogenesis and hepatogenesis during embryonic development, and the development of secretory tissues such as exocrine pancreas and salivary gland	28694.9	9.71	TRANSCRIPTION
THE HUMAN PROTEIN ATLAS	Chorionic somatomammotropin hormone 1	Produced only during pregnancy and is involved in stimulating lactation, fetal growth and metabolism. Does not interact with GHR but only activates PRLR through zinc-induced dimerization.	28765.5	5.06	CELL FUNCTION REGULATOR
THE HUMAN PROTEIN ATLAS	Chloride intracellular channel 4	Can insert into membranes and form poorly selective ion channels that may also transport chloride ions. Channel activity depends on the pH. Membrane insertion seems to be redox-regulated and may occur only under oxydizing conditions.	28772.1	5.45	CARRIER
THE HUMAN PROTEIN ATLAS	Twinfilin actin binding protein 1	Actin-binding protein involved in motile and morphological processes. Inhibits actin polymerization, likely by sequestering G-actin. By capping the barbed ends of filaments, it also regulates motility. Seems to play an important role in clathrin-mediated endocytosis and distribution of endocytic organelles (By similarity)	28822.9	7.13	INHIBITOR
UNIPROT	Twinfilin actin binding protein 1	Actin-binding protein involved in motile and morphological processes. Inhibits actin polymerization, likely by sequestering G-actin. By capping the barbed ends of filaments, it also regulates motility. Seems to play an important role in clathrin-mediated endocytosis and distribution of endocytic organelles (By similarity)	28822.9	7.13	INHIBITOR
THE HUMAN PROTEIN ATLAS	Shieldin complex subunit 3	Component of the shieldin complex, which plays an important role in repair of DNA double-stranded breaks (DSBs). During G1 and S phase of the cell cycle, the complex functions downstream of TP53BP1 to promote non-homologous end joining (NHEJ) and suppress DNA end resection. Mediates various NHEJ-dependent processes including immunoglobulin class-switch recombination, and fusion of unprotected tel…	28842.1	9.18	REPAIRING
THE HUMAN PROTEIN ATLAS	Growth hormone 2	Plays an important role in growth control. Its major role in stimulating body growth is to stimulate the liver and other tissues to secrete IGF-1.	28875	5.96	CELL FUNCTION REGULATOR
PMID: 20668027 DOI: 10.1210/en.2010-0170	Amiloride-binding protein	Amiloride binding protein 1 (Abp1) is a membrane-associated amine oxidase and mainly metabolizes histamine and putrescine.	28889.6	4.68	METABOLIC
THE HUMAN PROTEIN ATLAS	Methyltransferase like 25B	Predicted to enable rRNA (adenine-N6,N6-)-dimethyltransferase activity. Predicted to be involved in rRNA methylation. Predicted to be integral component of membrane. [provided by Alliance of Genome Resources, Apr 2022]	29011.7	9,47	ACTIVATOR
THE HUMAN PROTEIN ATLAS	Homeobox D12	Sequence-specific transcription factor which is part of a developmental regulatory system that provides cells with specific positional identities on the anterior-posterior axis.	29017.1	9.82	TRANSCRIPTION
THE HUMAN PROTEIN ATLAS	Copper chaperone for superoxide dismutase	Delivers copper to copper zinc superoxide dismutase	29040.6	5.32	CELLULAR ORGANIZATION
THE HUMAN PROTEIN ATLAS	3-ketodihydrosphingosine reductase	Catalyzes the reduction of 3-ketodihydrosphingosine (KDS) to dihydrosphingosine (DHS).	29158.9	5.21	ENZYME
THE HUMAN PROTEIN ATLAS	Trafficking from ER to golgi regulator	Plays a role in the normal dynamic function of the endoplasmic reticulum (ER) and its associated microtubules 1, 2. Required for secretory cargo traffic from the endoplasmic reticulum to the Golgi apparatus	29163.1	5,26	CARRIER
THE HUMAN PROTEIN ATLAS	SET domain containing 6, protein lysine methyltransferase	Catalytic component of the COMPASS (Set1C) complex that specifically mono-, di- and trimethylates histone H3 to form H3K4me1/2/3 Binds RNAs which might negatively affect its histone methyltransferase activity (By similarity). COMPASS recognizes ubiquitinated H2B on one face of the nucleosome which stimulates the methylation of H3 on the opposing face (By similarity). H3 'Lys-4' methylation repres…	29216.4	5.44	CATALYTIC ACTIVITY
PMID: 24661570 DOI: 10.1111/joim.12239	Ankyrin 1, erythrocyte splice form 1	Ankyrins are a family of membrane-associated proteins that can be divided into two immunologically distinct groups: (a) erythrocyte-related isoforms (ankyrinR) that have polarized distributions in particular cell types; and (b) brain-related isoforms (ankyrinB) that display a broader distribution. In this paper, we report the isolation and sequences of cDNAs related to two ankyrinB isoforms, huma…	29265.2	10.13	IMMUNOLOGICAL
THE HUMAN PROTEIN ATLAS	Tetratricopeptide repeat domain 33	Enzyme and pathway databases	29411.3	5,32	ENZYME
THE HUMAN PROTEIN ATLAS	Tetratricopeptide repeat domain 33	UNSPECIFIC	29411.3	5.32	UNSPECIFIC
UNIPROT	Tetratricopeptide repeat domain 33	UNSPECIFIC	29411.3	5.32	UNSPECIFIC
THE HUMAN PROTEIN ATLAS	Chromosome 11 open reading frame 54	Exhibits ester hydrolase activity on the substrate p-nitrophenyl acetate.	29491.6	5.34	ENZYME
THE HUMAN PROTEIN ATLAS	SH3KBP1 binding protein 1	Inhibits CBL-SH3KBP1 complex mediated down-regulation of EGFR signaling by sequestration of SH3KBP1. Binds to SH3KBP1 and prevents its interaction with CBL and inhibits translocation of SH3KBP1 to EGFR containing vesicles upon EGF stimulation.	29542.3	8.96	INHIBITOR
THE HUMAN PROTEIN ATLAS	Signal sequence receptor subunit 1	TRAP proteins are part of a complex whose function is to bind calcium to the ER membrane and thereby regulate the retention of ER resident proteins. May be involved in the recycling of the translocation apparatus after completion of the translocation process or may function as a membrane-bound chaperone facilitating folding of translocated proteins.	29547.1	4.16	ADHESION
THE HUMAN PROTEIN ATLAS	Somatomedin B and thrombospondin type 1 domain containing	Predicted to be an extracellular matrix structural constituent. Colocalizes with collagen-containing extracellular matrix	29610.5	7.71	STRUCTURAL
THE HUMAN PROTEIN ATLAS	CD82 molecule	Associates with CD4 or CD8 and delivers costimulatory signals for the TCR/CD3 pathway.	29611.5	5.14	BIOMARKER
THE HUMAN PROTEIN ATLAS	Carbonic anhydrase 7	Reversible hydration of carbon dioxide.	29658.4	6.92	CATALYTIC ACTIVITY
THE HUMAN PROTEIN ATLAS	HSPE1-MOB4 readthrough	This locus represents naturally occurring read-through transcription between the neighboring HSPE1 (heat shock 10kDa protein 1 (chaperonin 10)) and MOB4 (MOB family member 4, phocein) genes on chromosome 2	29736.8	5.79	TRANSCRIPTION
THE HUMAN PROTEIN ATLAS	Sterol O-acyltransferase 1	Catalyzes the formation of fatty acid-cholesterol esters, which are less soluble in membranes than cholesterol 1, 2, 3, 4, 5, 6. Plays a role in lipoprotein assembly and dietary cholesterol absorption 7, 8. Preferentially utilizes oleoyl-CoA ((9Z)-octadecenoyl-CoA) as a substrate: shows a higher activity towards an acyl-CoA substrate with a double bond at the delta-9 position (9Z) than towards sa…	29892.6	6	CATALYTIC ACTIVITY
THE HUMAN PROTEIN ATLAS	Zinc finger and SCAN domain containing 9	May be involved in transcriptional regulation.	29915.2	5.63	TRANSCRIPTION
THE HUMAN PROTEIN ATLAS	ER membrane protein complex subunit 3	Part of the endoplasmic reticulum membrane protein complex (EMC) that enables the energy-independent insertion into endoplasmic reticulum membranes of newly synthesized membrane proteins	29952	6.33	CELL FUNCTION REGULATOR
THE HUMAN PROTEIN ATLAS	Exosome component 8	Non-catalytic component of the RNA exosome complex which has 3'->5' exoribonuclease activity and participates in a multitude of cellular RNA processing and degradation events.	30039.6	5.17	CELL FUNCTION REGULATOR
THE HUMAN PROTEIN ATLAS	Neurexophilin and PC-esterase domain family member 4	Located in the extracellular exosome	30084.9	8.81	ENZYME
THE HUMAN PROTEIN ATLAS	Amylase alpha 2A	This gene encodes a member of the alpha-amylase family of proteins. Amylases are secreted proteins that hydrolyze 1,4-alpha-glucoside bonds in oligosaccharides and polysaccharides, catalyzing the first step in digestion of dietary starch and glycogen. This gene and several family members are present in a gene cluster on chromosome 1. This gene encodes an amylase isoenzyme produced by the pancreas…	30302.2	6.59	METABOLIC
THE HUMAN PROTEIN ATLAS	Pyridoxal phosphate binding protein	Pyridoxal 5'-phosphate (PLP)-binding protein, which may be involved in intracellular homeostatic regulation of pyridoxal 5'- phosphate (PLP), the active form of vitamin B6	30343.9	7.09	CELL FUNCTION REGULATOR
THE HUMAN PROTEIN ATLAS	Lysyl oxidase like 4	Catalyzes the oxidative deamination of lysine and hydroxylysine residues in collagen and elastin, resulting in the formation of covalent cross-linkages, and the stabilization of collagen and elastin fibers.	30351.9	6,12	CATALYTIC ACTIVITY
THE HUMAN PROTEIN ATLAS	Adaptor related protein complex 1 associated regulatory protein	Necessary for adaptor protein complex 1 (AP-1)-dependent transport between the trans-Golgi network and endosomes. Regulates the membrane association of AP1G1/gamma1-adaptin, one of the subunits of the AP-1 adaptor complex.	30459	4.7	CARRIER
THE HUMAN PROTEIN ATLAS	Zinc finger CCHC-type containing 9	May down-regulate transcription mediated by NF-kappa-B and the serum response element.	30477	9.33	TRANSCRIPTION
UNIPROT	Olfactory receptor 2A1	Odorant receptor.	30481	6.09	MOTOR
THE HUMAN PROTEIN ATLAS	Protein phosphatase 1 regulatory subunit 3E	Acts as a glycogen-targeting subunit for PP1. PP1 is involved in glycogen metabolism and contributes to the activation of glycogen synthase leading to an increase in glycogen synthesis	30643.6	11.16	METABOLIC
THE HUMAN PROTEIN ATLAS	Pancreatic and duodenal homeobox 1	Activates insulin, somatostatin, glucokinase, islet amyloid polypeptide and glucose transporter type 2 gene transcription. Particularly involved in glucose-dependent regulation of insulin gene transcription. As part of a PDX1:PBX1b:MEIS2b complex in pancreatic acinar cells is involved in the transcriptional activation of the ELA1 enhancer; the complex binds to the enhancer B element and cooperate…	30771	7.1	ACTIVATOR
UNIPROT	Ankyrin repeat containing protein ASB-2	Catalyzes the degradation of compounds such as putrescine, histamine, spermine, and spermidine, substances involved in allergic and immune responses, cell proliferation, tissue differentiation, tumor formation, and possibly apoptosis. Placental DAO is thought to play a role in the regulation of the female reproductive function.	30777.8	5.56	ADHESION
PMID: 10828078	Apolipoprotein A-I	control lipid binding and association with varying levels of lipids.	30777.8	5.56	METABOLIC
THE HUMAN PROTEIN ATLAS	Cytochrome P450 2C18	Actin-binding	30778.4	5.02	METABOLIC
THE HUMAN PROTEIN ATLAS	Family with sequence similarity 216 member A	UNSPECIFIC	30791.8	9.39	UNSPECIFIC
THE HUMAN PROTEIN ATLAS	Forkhead box I1	Transcriptional activator required for the development of normal hearing, sense of balance and kidney function.	30814.4	5.45	TRANSCRIPTION
THE HUMAN PROTEIN ATLAS	Trafficking protein particle complex subunit 10	Specific subunit of the TRAPP (transport protein particle) II complex, a highly conserved vesicle tethering complex that functions in late Golgi trafficking as a membrane tether	30857.3	5,20	CARRIER
THE HUMAN PROTEIN ATLAS	Ring finger protein 126	E3 ubiquitin-protein ligase that mediates ubiquitination oF target proteins 1, 2, 3, 4. Depending on the associated E2 ligase, mediates 'Lys-27'-, 'Lys-29'-, 'Lys-48'- and/or 'Lys-63'-linked polyubiquitination of substrates 5. Part of a BAG6-dependent quality control process ensuring that proteins of the secretory pathway that are mislocalized to the cytosol are degraded by the proteasome. Probab…	30872.1	4.86	CELL FUNCTION REGULATOR
THE HUMAN PROTEIN ATLAS	Calcium voltage-gated channel auxiliary subunit gamma 5	The protein encoded by this gene is a type II transmembrane AMPA receptor regulatory protein (TARP). TARPs regulate both trafficking and channel gating of the AMPA receptors.Visual perception	30902.8	6.94	CELL FUNCTION REGULATOR
THE HUMAN PROTEIN ATLAS	Vestigial like family member 4	May act as a specific coactivator for the mammalian TEFs	30947.5	8.49	ACTIVATOR
UNIPROT	Vestigial like family member 4	May act as a specific coactivator for the mammalian TEFs	30947.5	8.49	ACTIVATOR
THE HUMAN PROTEIN ATLAS	Protein phosphatase 1 catalytic subunit gamma	Protein phosphatase that associates with over 200 regulatory proteins to form highly specific holoenzymes which dephosphorylate hundreds of biological targets. Protein phosphatase 1 (PP1) is essential for cell division, and participates in the regulation of glycogen metabolism, muscle contractility and protein synthesis. Dephosphorylates RPS6KB1. Involved in regulation of ionic conductances and l…	30986.9	5.57	CELL CYCLE
THE HUMAN PROTEIN ATLAS	Proline rich protein BstNI subfamily 3 (PRB3)	Acts as a receptor for the Gram-negative bacterium F.nucleatum.	30999.2	10.97	RECEPTOR
THE HUMAN PROTEIN ATLAS	Gap junction protein beta 5	One gap junction consists of a cluster of closely packed pairs of transmembrane channels, the connexons, through which materials of low MW diffuse from one cell to a neighboring cell.	31088.3	8.53	CELL CYCLE
THE HUMAN PROTEIN ATLAS	BARX homeobox 2	Transcription factor. May control the expression of neural adhesion molecules such as L1 or Ng-CAM during embryonic development of both the central and peripherical nervous system. May be involved in controlling adhesive processes in keratinizing epithelia	31187.7	8.65	ADHESION
THE HUMAN PROTEIN ATLAS	Aminocarboxymuconate semialdehyde decarboxylase	Converts alpha-amino-beta-carboxymuconate-epsilon-semialdehyde (ACMS) to alpha-aminomuconate semialdehyde (AMS). ACMS can be converted non-enzymatically to quinolate (QA), a key precursor of NAD, and a potent endogenous excitotoxin of neuronal cells which is implicated in the pathogenesis of various neurodegenerative disorders.	31213.4	6.02	CELL FUNCTION REGULATOR
UNIPROT	Basic proline-rich peptide IB4(P-H)	General function(s) of a protein, Peptides IB-9 and P-E are the same peptide.	31325.5	10.52	IMMUNOLOGICAL
UNIPROT	Salivary proline-rich protein PO	Two new genetic polymorphisms (Pe and Po) are found in human parotid saliva. Each polymorphism is determined by the autosomal inheritance of one expressed (dominant) and one unexpressed (recessive) allele.	31325.5	10.52	IMMUNOLOGICAL
THE HUMAN PROTEIN ATLAS	Dehydrogenase/reductase 2	NADPH-dependent oxidoreductase which catalyzes the reduction of dicarbonyl compounds. Displays reductase activity in vitro with 3,4-hexanedione, 2,3-heptanedione and 1-phenyl-1,2-propanedione as substrates. May function as a dicarbonyl reductase in the enzymatic inactivation of reactive carbonyls involved in covalent modification of cellular components	31495.7	10.01	METABOLIC
THE HUMAN PROTEIN ATLAS	HCLS1 associated protein X-1	(UniProt)i Recruits the Arp2/3 complex to the cell cortex and regulates reorganization of the cortical actin cytoskeleton via its interaction with KCNC3 and the Arp2/3 complex	31620.5	4.76	CELLULAR ORGANIZATION
UNIPROT	Neutrophil gelatinase_x0002_associated lipocalin precursor	Neutrophil Gelatinase-Associated Lipocalin (NGAL), a small 25-kD peptide, originally discovered as an antibacterial factor of natural immunity and an acute-phase protein, represents a key factor in the regulation of erythrocyte growth due to its ability to inhibit the maturation and differentiation of bone marrow erythroid precursors.	31806.3	6.11	CELL CYCLE
THE HUMAN PROTEIN ATLAS	MAGE family member B5	Tumor antigen	31819.4	7,56	BIOMARKER
THE HUMAN PROTEIN ATLAS	Zinc finger CCCH-type containing 12A	Endoribonuclease involved in various biological functions such as cellular inflammatory response and immune homeostasis, glial differentiation of neuroprogenitor cells, cell death of cardiomyocytes, adipogenesis and angiogenesis. Functions as an endoribonuclease involved in mRNA decay	31916.2	5.88	CELL CYCLE
THE HUMAN PROTEIN ATLAS	TATA-box binding protein associated factor, RNA polymerase I subunit D	Component of the transcription factor SL1/TIF-IB complex, which is involved in the assembly of the PIC (preinitiation complex) during RNA polymerase I-dependent transcription. The rate of PIC formation probably is primarily dependent on the rate of association of SL1/TIF-IB with the rDNA promoter. SL1/TIF-IB is involved in stabilization of nucleolar transcription factor 1/UBTF on rDNA. Formation …	32057.9	8.8	TRANSCRIPTION
THE HUMAN PROTEIN ATLAS	Zinc finger CCCH-type containing 14	Involved in poly(A) tail length control in neuronal cells. Binds the polyadenosine RNA oligonucleotides.	32084	8.5	ADHESION
THE HUMAN PROTEIN ATLAS	SIX homeobox 1	Transcription factor that is involved in the regulation of cell proliferation, apoptosis and embryonic development. Plays an important role in the development of several organs, including kidney, muscle and inner ear. Depending on context, functions as transcriptional repressor or activator	32210.2	9.24	ACTIVATOR
THE HUMAN PROTEIN ATLAS	Reticulon 4 interacting protein 1	Plays a role in the regulation of retinal ganglion cell (RGC) neurite outgrowth, and hence in the development of the inner retina and optic nerve. Appears to be a potent inhibitor of regeneration following spinal cord injury.	32235.2	8.24	CELL FUNCTION REGULATOR
THE HUMAN PROTEIN ATLAS	Coiled-coil domain containing 122	This gene encodes a protein that contains a coiled-coil domain. Naturally occurring mutations in this gene are associated with leprosy.	32239.4	6.04	STRUCTURAL
THE HUMAN PROTEIN ATLAS	Prenylcysteine oxidase 1	Prenylcysteine oxidase that cleaves the thioether bond of prenyl-L-cysteines, such as farnesylcysteine and geranylgeranylcysteine 1, 2, 3. Only active against free prenylcysteines and not prenylcysteine residues within prenylated proteins or peptides (By similarity). Involved in the final step in the degradation of prenylated proteins, by degrading prenylcysteines after the protein has been degra…	32258.5	6.24	ENZYME
THE HUMAN PROTEIN ATLAS	Cone-rod homeobox	Transcription factor that binds and transactivates the sequence 5'-TAATC[CA]-3' which is found upstream of several photoreceptor-specific genes, including the opsin genes.	32261.3	9.23	TRANSCRIPTION
THE HUMAN PROTEIN ATLAS	Malate dehydrogenase 1B	Oxidoreductase	32291.2	6,32	ACTIVATOR
THE HUMAN PROTEIN ATLAS	Propionyl-CoA carboxylase subunit beta	This is one of the 2 subunits of the biotin-dependent propionyl-CoA carboxylase (PCC), a mitochondrial enzyme involved in the catabolism of odd chain fatty acids, branched-chain amino acids isoleucine, threonine, methionine, and valine and other metabolites 1, 2. Propionyl-CoA carboxylase catalyzes the carboxylation of propionyl-CoA/propanoyl-CoA to D-methylmalonyl-CoA/(S)-methylmalonyl-CoA 3, 4.…	32468	7.04	ENZYME
UNIPROT	Zinc finger protein 691	Predicted to enable DNA-binding transcription factor activity and RNA polymerase II cis-regulatory region sequence-specific DNA binding activity. Predicted to be involved in regulation of transcription by RNA polymerase II. Predicted to be located in nucleus. [provided by Alliance of Genome Resources, Apr 2022]	32502	8.68	TRANSCRIPTION
THE HUMAN PROTEIN ATLAS	Zinc finger protein 691	Predicted to enable DNA-binding transcription factor activity and RNA polymerase II cis-regulatory region sequence-specific DNA binding activity. Predicted to be involved in regulation of transcription by RNA polymerase II. Predicted to be located in nucleus. [provided by Alliance of Genome Resources, Apr 2022]	32502	8.68	TRANSCRIPTION
THE HUMAN PROTEIN ATLAS	Tetratricopeptide repeat domain 23 like	Predicted to be located in cytoplasm; microtubule cytoskeleton; and midbody.	32680.5	8.59	STRUCTURAL
THE HUMAN PROTEIN ATLAS	Transmembrane protein 19	Predicted to be integral component of membrane. Predicted to be active in membrane.	32749.8	11,44	STRUCTURAL
THE HUMAN PROTEIN ATLAS	Transmembrane protein 200B	Predicted to be integral component of membrane.	32749.8	11,44	STRUCTURAL
THE HUMAN PROTEIN ATLAS	LRAT domain containing 2	Located in cytoplasm and plasma membrane. [provided by Alliance of Genome Resources, Apr 2022]	32818.6	5,62	STRUCTURAL
THE HUMAN PROTEIN ATLAS	Heme oxygenase 1	[Heme oxygenase 1]: Catalyzes the oxidative cleavage of heme at the alpha-methene bridge carbon, released as carbon monoxide (CO), to generate biliverdin IXalpha, while releasing the central heme iron chelate as ferrous iron	32818.6	7.89	ENZYME
THE HUMAN PROTEIN ATLAS	ADP ribosylation factor like GTPase 13A	GTP-binding, Nucleotide-binding	32985.4	9.24	ENZYME
THE HUMAN PROTEIN ATLAS	Fms related receptor tyrosine kinase 4	Tyrosine-protein kinase that acts as a cell-surface receptor for VEGFC and VEGFD, and plays an essential role in adult lymphangiogenesis and in the development of the vascular network and the cardiovascular system during embryonic development.	33018.3	4.86	RECEPTOR
THE HUMAN PROTEIN ATLAS	C-type lectin domain family 18 member C	Binds polysaccharidesin a Ca(2+)-independent manner with a preferentially binding to fucoidan, beta-glucans and galactans.	33089.9	8.62	CELL FUNCTION REGULATOR
THE HUMAN PROTEIN ATLAS	Calponin 1	Thin filament-associated protein that is implicated in the regulation and modulation of smooth muscle contraction. It is capable of binding to actin, calmodulin and tropomyosin. The interaction of calponin with actin inhibits the actomyosin Mg-ATPase activity (By similarity).	33170.4	9.14	MOTOR
THE HUMAN PROTEIN ATLAS	CD47 molecule	Has a role in both cell adhesion by acting as an adhesion receptor for THBS1 on platelets, and in the modulation of integrins. Plays an important role in memory formation and synaptic plasticity in the hippocampus	33192.3	8.09	ADHESION
THE HUMAN PROTEIN ATLAS	Keratin 23	The protein encoded by this gene is a member of the keratin family. The keratins are intermediate filament proteins responsible for the structural integrity of epithelial cells and are subdivided into cytokeratins and hair keratins. The type I cytokeratins consist of acidic proteins which are arranged in pairs of heterotypic keratin chains. The type I cytokeratin genes are clustered in a region o…	33340.7	5,34	STRUCTURAL
PMID: 20858015 DOI: 10.1021/pr100786y	T-cell receptor β chain (fragment)	Involved in transcriptional activation and repression of select genes by chromatin remodeling (alteration of DNA-nucleosome topology). Component of SWI/SNF chromatin remodeling complexes that carry out key enzymatic activities, changing chromatin structure by altering DNA-histone contacts within a nucleosome in an ATP-dependent manner.	33378.1	8.88	RECEPTOR
THE HUMAN PROTEIN ATLAS	Pyrroline-5-carboxylate reductase 1	Housekeeping enzyme that catalyzes the last step in proline biosynthesis. Can utilize both NAD and NADP, but has higher affinity for NAD. Involved in the cellular response to oxidative stress	33379.7	7.76	CATALYTIC ACTIVITY
THE HUMAN PROTEIN ATLAS	Interleukin 15 receptor subunit alpha	High-affinity receptor for interleukin-15	33384.8	9.15	RECEPTOR
THE HUMAN PROTEIN ATLAS	Transmembrane protein 178B	Predicted to be integral component of membrane. Predicted to be active in membrane.	33408.9	9,45	STRUCTURAL
THE HUMAN PROTEIN ATLAS	DTW domain containing 2	Catalyzes the formation of 3-(3-amino-3-carboxypropyl)uridine (acp3U) at position 20a in the D-loop of several cytoplasmic tRNAs (acp3U(20a))	33415.7	8.95	CELL FUNCTION REGULATOR
THE HUMAN PROTEIN ATLAS	Mitochondrial ribosomal protein L15	Ribonucleoprotein, Ribosomal protein	33419.8	10.02	CELL FUNCTION REGULATOR
THE HUMAN PROTEIN ATLAS	Small glutamine rich tetratricopeptide repeat containing beta	Co-chaperone that binds directly to HSC70 and HSP70 and regulates their ATPase activity.	33429.4	4.8	CELLULAR ORGANIZATION
THE HUMAN PROTEIN ATLAS	GPN-loop GTPase 1	Can act in one step of the RNAP assembly prior to nuclear importation	33454.6	4.56	CELL FUNCTION REGULATOR
THE HUMAN PROTEIN ATLAS	Queuine tRNA-ribosyltransferase accessory subunit 2	Non-catalytic subunit of the queuine tRNA-ribosyltransferase (TGT) that catalyzes the base-exchange of a guanine (G) residue with queuine (Q) at position 34 (anticodon wobble position) in tRNAs with GU(N) anticodons (tRNA-Asp, -Asn, -His and -Tyr), resulting in the hypermodified nucleoside queuosine (7-(((4,5-cis-dihydroxy-2-cyclopenten-1-yl)amino)methyl)-7-deazaguanosine).	33471.4	5.63	CATALYTIC ACTIVITY
THE HUMAN PROTEIN ATLAS	Transmembrane protein 169	Enzyme and pathway databases	33498	4,76	ENZYME
THE HUMAN PROTEIN ATLAS	ALG5 dolichyl-phosphate beta-glucosyltransferase	This gene encodes a member of the glycosyltransferase 2 family. The encoded protein participates in glucosylation of the oligomannose core in N-linked glycosylation of proteins. The addition of glucose residues to the oligomannose core is necessary to ensure substrate recognition, and therefore, effectual transfer of the oligomannose core to the nascent glycoproteins.	33525.3	9.48	METABOLIC
UNIPROT	Upstream transcription factor 1	Transcription factor that binds to a symmetrical DNA sequence (E-boxes) (5'-CACGTG-3') that is found in a variety of viral and cellular promoters.	33538.1	5.36	TRANSCRIPTION
THE HUMAN PROTEIN ATLAS	Upstream transcription factor 1	Transcription factor that binds to a symmetrical DNA sequence (E-boxes) (5'-CACGTG-3') that is found in a variety of viral and cellular promoters.	33538.1	5.36	TRANSCRIPTION
THE HUMAN PROTEIN ATLAS	NSF attachment protein beta	Required for vesicular transport between the endoplasmic reticulum and the Golgi apparatus	33556.9	5.32	CELL FUNCTION REGULATOR
THE HUMAN PROTEIN ATLAS	Solute carrier family 1 member 5	Sodium-coupled antiporter of neutral amino acids. In a tri-substrate transport cycle, exchanges neutral amino acids between the extracellular and intracellular compartments, coupled to the inward cotransport of at least one sodium ion 1, 2, 3, 4, 5, 6. The preferred substrate is the essential amino acid L-glutamine, a precursor for biosynthesis of proteins, nucleotides and amine sugars as well as…	33709.8	5.27	CARRIER
THE HUMAN PROTEIN ATLAS	Sulfotransferase family 2A member 1	Sulfotransferase that utilizes 3'-phospho-5'-adenylyl sulfate (PAPS) as sulfonate donor to catalyze the sulfonation of steroids and bile acids in the liver and adrenal glands. Mediates the sulfation of a wide range of steroids and sterols, including pregnenolone, androsterone, DHEA, bile acids, cholesterol and as well many xenobiotics that contain alcohol and phenol functional groups 1, 2, 3, 4, …	33779.8	5.69	ACTIVATOR
THE HUMAN PROTEIN ATLAS	Procollagen C-endopeptidase enhancer 2	Binds to the C-terminal propeptide of types I and II procollagens and may enhance the cleavage of that propeptide by BMP1.	33807	8.22	CELLULAR ORGANIZATION
THE HUMAN PROTEIN ATLAS	Uroplakin 3B	Component of the asymmetric unit membrane (AUM); a highly specialized biomembrane elaborated by terminally differentiated urothelial cells. May play an important role in AUM-cytoskeleton interaction in terminally differentiated urothelial cells. It also contributes to the formation of urothelial glycocalyx which may play an important role in preventing bacterial adherence (By similarity).	33851.6	6.44	INHIBITOR
UNIPROT	Uroplakin 3B	Component of the asymmetric unit membrane (AUM); a highly specialized biomembrane elaborated by terminally differentiated urothelial cells. May play an important role in AUM-cytoskeleton interaction in terminally differentiated urothelial cells. It also contributes to the formation of urothelial glycocalyx which may play an important role in preventing bacterial adherence (By similarity).	33851.6	6.44	STRUCTURAL
THE HUMAN PROTEIN ATLAS	Phosphoglycolate phosphatase	Glycerol-3-phosphate phosphatase hydrolyzing glycerol-3-phosphate into glycerol. Thereby, regulates the cellular levels of glycerol-3-phosphate a metabolic intermediate of glucose, lipid and energy metabolism. Was also shown to have a 2-phosphoglycolate phosphatase activity and a tyrosine-protein phosphatase activity. However, their physiological relevance is unclear 1. In vitro, has also a phosp…	34006.1	5.85	ENZYME
THE HUMAN PROTEIN ATLAS	ADAM metallopeptidase with thrombospondin type 1 motif 6	Members of the family share several distinct protein modules, including a propeptide region, a metalloproteinase domain, a disintegrin-like domain, and a thrombospondin type 1 (TS) motif. Individual members of this family differ in the number of C-terminal TS motifs, and some have unique C-terminal domains.	34188.7	7.37	ENZYME
THE HUMAN PROTEIN ATLAS	Sulfotransferase family 1A member 3	Sulfotransferase that utilizes 3'-phospho-5'-adenylyl sulfate (PAPS) as sulfonate donor to catalyze the sulfate conjugation of phenolic monoamines (neurotransmitters such as dopamine, norepinephrine and serotonin) and phenolic and catechol drugs.	34196.2	5.68	ACTIVATOR
UNIPROT	Zinc finger protein 784	Predicted to enable DNA-binding transcription factor activity and RNA polymerase II cis-regulatory region sequence-specific DNA binding activity. Predicted to be involved in regulation of transcription by RNA polymerase II. Predicted to be located in nucleus. [provided by Alliance of Genome Resources, Apr 2022]	34237.3	7.95	TRANSCRIPTION
THE HUMAN PROTEIN ATLAS	Zinc finger protein 784	Predicted to enable DNA-binding transcription factor activity and RNA polymerase II cis-regulatory region sequence-specific DNA binding activity. Predicted to be involved in regulation of transcription by RNA polymerase II. Predicted to be located in nucleus. [provided by Alliance of Genome Resources, Apr 2022]	34237.3	7.95	TRANSCRIPTION
UNIPROT	Zinc-a-2glycoprotein	Stimulates lipid degradation in adipocytes and causes the extensive fat losses associated with some advanced cancers. May bind polyunsaturated fatty acids.	34258.7	5.71	ANTIMICROBIAL
UNIPROT	Zinc-α2-glycoprotein precursor	Stimulates lipid degradation in adipocytes and causes the extensive fat losses associated with some advanced cancers. May bind polyunsaturated fatty acids.	34258.7	5.71	CARRIER
THE HUMAN PROTEIN ATLAS	Glycine-N-acyltransferase like 2	Mitochondrial acyltransferase which transfers the acyl group to the N-terminus of glycine 1, 2. Conjugates numerous substrates, such as arachidonoyl-CoA and saturated medium and long-chain acyl-CoAs ranging from chain-length C8:0-CoA to C18:0-CoA, to form a variety of N-acylglycines. Shows a preference for monounsaturated fatty acid oleoyl-CoA (C18:1-CoA) as an acyl donor. Does not exhibit any ac…	34266.2	6,56	ENZYME
THE HUMAN PROTEIN ATLAS	SRY-box transcription factor 2	Transcription factor that forms a trimeric complex with OCT4 on DNA and controls the expression of a number of genes involved in embryonic development such as YES1, FGF4, UTF1 and ZFP206 (By similarity). Binds to the proximal enhancer region of NANOG (By similarity). Critical for early embryogenesis and for embryonic stem cell pluripotency 1. Downstream SRRT target that mediates the promotion of …	34309.8	9.74	TRANSCRIPTION
THE HUMAN PROTEIN ATLAS	NKD inhibitor of WNT signaling pathway 2	Cell autonomous antagonist of the canonical Wnt signaling pathway. May activate a second Wnt signaling pathway that controls planar cell polarity (By similarity). Required for processing of TGFA and for targeting of TGFA to the basolateral membrane of polarized epithelial cells	34313.8	6.13	SIGNAL
THE HUMAN PROTEIN ATLAS	Phospholipid phosphatase 2	Magnesium-independent phospholipid phosphatase that catalyzes the dephosphorylation of a variety of glycerolipid and sphingolipid phosphate esters including phosphatidate/PA, lysophosphatidate/LPA, sphingosine 1-phosphate/S1P and ceramide 1-phosphate/C1P 1, 2, 3. Has no apparent extracellular phosphatase activity and therefore most probably acts intracellularly 4. Also acts on N-oleoyl ethanolami…	34392.6	8.89	CATALYTIC ACTIVITY
THE HUMAN PROTEIN ATLAS	Olfactory receptor family 2 subfamily Z member 1	Odorant receptor.	34443.8	7.57	RECEPTOR
THE HUMAN PROTEIN ATLAS	Ribonucleotide reductase regulatory TP53 inducible subunit M2B	Plays a pivotal role in cell survival by repairing damaged DNA in a p53/TP53-dependent manner. Supplies deoxyribonucleotides for DNA repair in cells arrested at G1 or G2. Contains an iron-tyrosyl free radical center required for catalysis. Forms an active ribonucleotide reductase (RNR) complex with RRM1 which is expressed both in resting and proliferating cells in response to DNA damage.	34528.6	4.8	REPAIRING
THE HUMAN PROTEIN ATLAS	Fumarylacetoacetate hydrolase domain containing 2A	May have hydrolase activity.	34596.2	8.48	CELL FUNCTION REGULATOR
THE HUMAN PROTEIN ATLAS	Fumarylacetoacetate hydrolase domain containing 2B	May have hydrolase activity.	34613.2	7.64	CELL FUNCTION REGULATOR
UNIPROT	Proline-rich peptide P-B precursor	General function(s) of a protein	34714.3	8.9	IMMUNOLOGICAL
THE HUMAN PROTEIN ATLAS	Ribonuclease H2 subunit B	Non catalytic subunit of RNase H2, an endonuclease that specifically degrades the RNA of RNA:DNA hybrids. Participates in DNA replication, possibly by mediating the removal of lagging-strand Okazaki fragment RNA primers during DNA replication. Mediates the excision of single ribonucleotides from DNA:RNA duplexes.	34755.2	9.19	CELL FUNCTION REGULATOR
THE HUMAN PROTEIN ATLAS	Sulfotransferase family 1A member 4	Sulfotransferase that utilizes 3'-phospho-5'-adenylyl sulfate (PAPS) as sulfonate donor to catalyze the sulfate conjugation of phenolic monoamines (neurotransmitters such as dopamine, norepinephrine and serotonin) and phenolic and catechol drugs.	34779.8	5.57	ACTIVATOR
THE HUMAN PROTEIN ATLAS	Olfactory receptor family 5 subfamily J member 2	Odorant receptor.	34808.5	8.3	RECEPTOR
THE HUMAN PROTEIN ATLAS	Ring finger and FYVE like domain containing E3 ubiquitin protein ligase	E3 ubiquitin-protein ligase that regulates several biological processes through the ubiquitin-mediated proteasomal degradation of various target proteins. Mediates 'Lys-48'-linked polyubiquitination of PRR5L and its subsequent proteasomal degradation thereby indirectly regulating cell migration through the mTORC2 complex. Ubiquitinates the caspases CASP8 and CASP10, promoting their proteasomal de…	34809.6	5.41	CELL FUNCTION REGULATOR
PMID: 20176268 DOI: 10.1016/j.jaci.2009.09.046 (UNIPROT)	Transcobalmin I	General transcription factor that plays a role in transcription initiation by RNA polymerase II (Pol II). Involved in the pre-initiation complex (PIC) formation and Pol II recruitment at promoter DNA.	34832.9	8.67	ADHESION
THE HUMAN PROTEIN ATLAS	Leucine rich repeat containing 26	Auxiliary protein of the large-conductance, voltage and calcium-activated potassium channel (BK alpha). Required for the conversion of BK alpha channels from a high-voltage to a low-voltage activated channel type in non-excitable cells. These are characterized by negative membrane voltages and constant low levels of calcium.	34856.7	9,60	STRUCTURAL
THE HUMAN PROTEIN ATLAS	ETS homologous factor	Transcriptional activator that may play a role in regulating epithelial cell differentiation and proliferation. May act as a repressor for a specific subset of ETS/AP-1-responsive genes and as a modulator of the nuclear response to mitogen-activated protein kinase signaling cascades. Binds to DNA sequences containing the consensus nucleotide core sequence GGAA.	34893.2	6.42	TRANSCRIPTION
THE HUMAN PROTEIN ATLAS	Solute carrier family 22 member 18	May act as a transporter of organic cations based on a proton efflux antiport mechanism. May play a role in the transport of chloroquine and quinidine-related compounds in kidney.	34952.8	9.74	CARRIER
THE HUMAN PROTEIN ATLAS	Yip1 domain family member 2	Predicted to enable small GTPase binding activity. Predicted to be involved in vesicle-mediated transport. Located in Golgi apparatus subcompartment and transport vesicle. [provided by Alliance of Genome Resources, Apr 2022]	35151.5	5.43	ADHESION
UNIPROT	Yip1 domain family member 2	Predicted to enable small GTPase binding activity. Predicted to be involved in vesicle-mediated transport. Located in Golgi apparatus subcompartment and transport vesicle. [provided by Alliance of Genome Resources, Apr 2022]	35151.5	5.43	CARRIER
THE HUMAN PROTEIN ATLAS	Barttin CLCNK type accessory subunit beta	Functions as a beta-subunit for CLCNKA and CLCNKB chloride channels. In the kidney CLCNK/BSND heteromers mediate chloride reabsorption by facilitating its basolateral efflux.	35197.2	4.24	CELL FUNCTION REGULATOR
THE HUMAN PROTEIN ATLAS	Sterol-C5-desaturase	Catalyzes the penultimate step of the biosynthesis of cholesterol, the dehydrogenation of lathosterol into 7-dehydrocholesterol (7-DHC). Cholesterol is the major sterol component in mammalian membranes and a precursor for bile acid and steroid hormone synthesis 1, 2. In addition to its essential role in cholesterol biosynthesis, it also indirectly regulates ferroptosis through the production of 7…	35260.8	7.84	CATALYTIC ACTIVITY
UNIPROT	Von Willebrand factor C domain containing 2	BMP antagonist which may play a role in neural development. Promotes cell adhesion (By similarity)	35282	5.29	ADHESION
THE HUMAN PROTEIN ATLAS	Von Willebrand factor C domain containing 2	BMP antagonist which may play a role in neural development. Promotes cell adhesion (By similarity)	35282	5.29	STRUCTURAL
THE HUMAN PROTEIN ATLAS	Galactosidase beta 1 like 3	Predicted to enable beta-galactosidase activity. Predicted to be involved in carbohydrate metabolic process. Predicted to be active in vacuole.	35389.9	9.35	CELL FUNCTION REGULATOR
THE HUMAN PROTEIN ATLAS	Ras association domain family member 6	Involved in the induction of apoptosis, through both caspase-dependent and caspase-independent pathways. May act as a Ras effector protein. May suppress the serum-induced basal levels of NF-kappa-B (By similarity).	35455.6	8.68	CELL DEATH
THE HUMAN PROTEIN ATLAS	Anaphase promoting complex subunit 1	Component of the anaphase promoting complex/cyclosome (APC/C), a cell cycle-regulated E3 ubiquitin ligase that controls progression through mitosis and the G1 phase of the cell cycle 1. The APC/C complex acts by mediating ubiquitination and subsequent degradation of target proteins: it mainly mediates the formation of 'Lys-11'-linked polyubiquitin chains and, to a lower extent, the formation of '…	35479.3	6.74	CELL CYCLE
THE HUMAN PROTEIN ATLAS	Olfactory receptor family 7 subfamily A member 5	Odorant receptor.	35552.2	8.33	RECEPTOR
THE HUMAN PROTEIN ATLAS	Protein phosphatase 2 catalytic subunit beta	Catalytic subunit of protein phosphatase 2A (PP2A), a serine/threonine phosphatase involved in the regulation of a wide variety of enzymes, signal transduction pathways, and cellular events (Probable). PP2A can modulate the activity of phosphorylase B kinase, casein kinase 2, mitogen-stimulated S6 kinase, and MAP-2 kinase	35575.1	5.21	ENZYME
THE HUMAN PROTEIN ATLAS	Protein phosphatase 2 catalytic subunit alpha	PP2A is the major phosphatase for microtubule-associated proteins (MAPs) 1. PP2A can modulate the activity of phosphorylase B kinase casein kinase 2, mitogen-stimulated S6 kinase, and MAP-2 kinase 2. Cooperates with SGO2 to protect centromeric cohesin from separase-mediated cleavage in oocytes specifically during meiosis I (By similarity). Can dephosphorylate SV40 large T antigen and p53/TP53 3. …	35594.2	5.3	ENZYME
THE HUMAN PROTEIN ATLAS	Wnt family member 9B	Ligand for members of the frizzled family of seven transmembrane receptors (Probable). Functions in the canonical Wnt/beta-catenin signaling pathway. Required for normal embryonic kidney development, and for normal development of the urogenital tract, including uterus and part of the oviduct and the upper vagina in females, and epididymis and vas deferens in males.	35606.9	9.73	CELL CYCLE
THE HUMAN PROTEIN ATLAS	Olfactory receptor family 6 subfamily N member 2	Odorant receptor.	35691.7	9.08	RECEPTOR
THE HUMAN PROTEIN ATLAS	Olfactory receptor family 4 subfamily N member 4C	Odorant receptor.	35706.3	9.03	RECEPTOR
THE HUMAN PROTEIN ATLAS	Tumor associated calcium signal transducer 2	May function as a growth factor receptor.	35709.4	9.14	IMMUNOLOGICAL
THE HUMAN PROTEIN ATLAS	Olfactory receptor family 4 subfamily N member 4	Odorant receptor.	35724.3	9.03	RECEPTOR
THE HUMAN PROTEIN ATLAS	ACLong intergenic non-protein coding RNA 2203	Predicted to enable G protein-coupled receptor activity and olfactory receptor activity. Predicted to be involved in G protein-coupled receptor signaling pathway and detection of chemical stimulus involved in sensory perception of smell. Predicted to be integral component of membrane. [provided by Alliance of Genome Resources, Apr 2022]	35887.5	9,03	ACTIVATOR
THE HUMAN PROTEIN ATLAS	Ig γ-3 chain C region	Constant region of immunoglobulin heavy chains. Immunoglobulins, also known as antibodies, are membrane-bound or secreted glycoproteins produced by B lymphocytes. In the recognition phase of humoral immunity, the membrane-bound immunoglobulins serve as receptors which, upon binding of a specific antigen, trigger the clonal expansion and differentiation of B lymphocytes into immunoglobulins-secret…	35900.6	7.66	IMMUNOLOGICAL
PMID: 2176490 DOI: 10.1016/s0006-291x(05)80940-4 PMID: 16408020 DOI: 10.1038/nchembio720 UNIPROT	Ig γ-4 chain C region	Constant region of immunoglobulin heavy chains. Immunoglobulins, also known as antibodies, are membrane-bound or secreted glycoproteins produced by B lymphocytes. In the recognition phase of humoral immunity, the membrane-bound immunoglobulins serve as receptors which, upon binding of a specific antigen, trigger the clonal expansion and differentiation of B lymphocytes into immunoglobulins-secret…	35940.6	7.18	IMMUNOLOGICAL
PMID: 16423834 DOI: 10.1074/jbc.M507705200	Ig λ light chain	Constant region of immunoglobulin heavy chains. Immunoglobulins, also known as antibodies, are membrane-bound or secreted glycoproteins produced by B lymphocytes. In the recognition phase of humoral immunity, the membrane-bound immunoglobulins serve as receptors which, upon binding of a specific antigen, trigger the clonal expansion and differentiation of B lymphocytes into immunoglobulins-secret…	35940.6	7.18	IMMUNOLOGICAL
THE HUMAN PROTEIN ATLAS	Meis homeobox 1	Acts as a transcriptional regulator of PAX6. Acts as a transcriptional activator of PF4 in complex with PBX1 or PBX2. Required for hematopoiesis, megakaryocyte lineage development and vascular patterning. May function as a cofactor for HOXA7 and HOXA9 in the induction of myeloid leukemias.	35957.3	6,06	TRANSCRIPTION
UNIPROT	glyceraldehyde 3-phosphate dehydrogenase	May play an important role in regulating the switch between different pathways for energy production during spermiogenesis and in the spermatozoon. Required for sperm motility and male fertility	36053.2	8.57	ENZYME
UNIPROT	Ig γ-1 chain C region	Pattern recognition receptor (PRR) located on the cell surface that participates in the activation of innate immunity and inflammatory response. Recognizes small molecular motifs named pathogen-associated molecular pattern (PAMPs) expressed by pathogens and microbe-associated molecular patterns (MAMPs) usually expressed by resident microbiota	36105.9	8.46	IMMUNOLOGICAL
THE HUMAN PROTEIN ATLAS	Chromosome 11 open reading frame 87	Predicted to be integral component of membrane.	36140.6	11.42	STRUCTURAL
THE HUMAN PROTEIN ATLAS	Yes1 associated transcriptional regulator	Transcriptional regulator which can act both as a coactivator and a corepressor and is the critical downstream regulatory target in the Hippo signaling pathway that plays a pivotal role in organ size control and tumor suppression by restricting proliferation and promoting apoptosis	36232.2	4.66	ACTIVATOR
THE HUMAN PROTEIN ATLAS	Aminolevulinate dehydratase	Catalyzes an early step in the biosynthesis of tetrapyrroles. Binds two molecules of 5-aminolevulinate per subunit, each at a distinct site, and catalyzes their condensation to form porphobilinogen.	36280.8	6.15	ENZYME
THE HUMAN PROTEIN ATLAS	RWD domain containing 2B	Enzyme and pathway databases	36332.5	5.61	ENZYME
UNIPROT	UTF1	Polypeptide N-acetylgalactosaminyltransferase that catalyzes the initiation of protein O-linked glycosylation and is involved in left/right asymmetry by mediating O-glycosylation of NOTCH1. O-glycosylation of NOTCH1 promotes activation of NOTCH1, modulating the balance between motile and immotile (sensory) cilia at the left-right organiser (LRO). Polypeptide N-acetylgalactosaminyltransferases cat…	36438.5	10.9	TRANSCRIPTION
UNIPROT	Zinc finger protein 101	Transcription, Transcription regulation	36472.6	9.88	TRANSCRIPTION
THE HUMAN PROTEIN ATLAS	Zinc finger protein 101	Transcription, Transcription regulation	36472.6	9.88	TRANSCRIPTION
UNIPROT	Basic proline-rich peptide IB-8c (P-F)	General function(s) of a protein, Peptides IB-9 and P-E are the same peptide.	36507.3	5.72	IMMUNOLOGICAL
THE HUMAN PROTEIN ATLAS	Adenosine A1 receptor	Receptor for adenosine. The activity of this receptor is mediated by G proteins which inhibit adenylyl cyclase.	36511.8	8.90	RECEPTOR
THE HUMAN PROTEIN ATLAS	Transmembrane and coiled-coil domain family 1	Endoplasmic reticulum membrane protein that promotes endoplasmic reticulum-associated endosome fission	36521.2	5.16	CARRIER
PMID: 1830192	Ig γ-2 chain C region	Constant region of immunoglobulin heavy chains. Immunoglobulins, also known as antibodies, are membrane-bound or secreted glycoproteins produced by B lymphocytes. In the recognition phase of humoral immunity, the membrane-bound immunoglobulins serve as receptors which, upon binding of a specific antigen, trigger the clonal expansion and differentiation of B lymphocytes into immunoglobulins-secret…	36574.7	7.64	IMMUNOLOGICAL
THE HUMAN PROTEIN ATLAS	Olfactory receptor family 2 subfamily AE member 1	Odorant receptor.	36575.8	9.28	RECEPTOR
PMID: 34083463 DOI: 10.1126/science.abe9124	Ig α-2 chain C region	Constant region of immunoglobulin heavy chains. Immunoglobulins, also known as antibodies, are membrane-bound or secreted glycoproteins produced by B lymphocytes. In the recognition phase of humoral immunity, the membrane-bound immunoglobulins serve as receptors which, upon binding of a specific antigen, trigger the clonal expansion and differentiation of B lymphocytes into immunoglobulins-secret…	36591.3	5.86	IMMUNOLOGICAL
THE HUMAN PROTEIN ATLAS	Mucin 15, cell surface associated	May play a role in the cell adhesion to the extracellular matrix.	36606.8	4.93	ADHESION
THE HUMAN PROTEIN ATLAS	WW and C2 domain containing 2	This gene encodes a member of the WW-and-C2-domain-containing family of proteins. Members of this family have two N-terminal WW domains that mediate binding to target proteins harboring L/PPxY motifs, an internal C2 domain for membrane association, and C-terminal alpha protein kinase C binding sites and class III PDZ domain-interaction motifs. Proteins of this family are able to form homo- and he…	36660.5	8.98	ADHESION
PMID: 29339672	Lactate dehydrogenase	Lactate dehydrogenase is a ubiquitous enzyme as it is detectable in the cytoplasm of almost every cell in the human body. Inside the cell during aerobic glycolysis, glucose is used for the production of pyruvate.	36688.7	8.44	METABOLIC
THE HUMAN PROTEIN ATLAS	TARBP2 subunit of RISC loading complex	Required for formation of the RNA induced silencing complex	36916.1	7.07	ADHESION
PMID: 16146751 DOI: 10.2741/1817	MMP-9	Alteration of matrix metalloproteinases (MMPs) and tissue inhibitors of metalloproteinases (TIMPs) expression has been studied for various cardiac diseases, including dilated cardiomyopathy (DCM), with the significance of surrogate markers of extracellular matrix (ECM) remodeling. In this study, we determined the MMP-8, MMP-9 and TIMP-2 immunoexpression in the heart of patients diagnosed with DCM…	36940.2	5.11	BIOMARKER
PMID: 31697592 DOI: 10.1089/cbr.2019.2829	Nucleobindin 2	Nucleobindin-2 (NUCB2) is the precursor protein of nesfatin-1, which have a variety of metabolic functions, such as food intake and temperature regulation.	36974.3	7.5	BIOMARKER
THE HUMAN PROTEIN ATLAS	Family with sequence similarity 170 member A	Acts as a nuclear transcription factor that positively regulates the expression of heat shock genes. Binds to heat shock promoter elements (HSE).	37060.8	5	TRANSCRIPTION
THE HUMAN PROTEIN ATLAS	G protein subunit beta 3	Guanine nucleotide-binding proteins (G proteins) are involved as a modulator or transducer in various transmembrane signaling systems. The beta and gamma chains are required for the GTPase activity, for replacement of GDP by GTP, and for G protein-effector interaction.	37118	5.39	ENZYME
THE HUMAN PROTEIN ATLAS	Tenomodulin	May be an angiogenesis inhibitor.	37130.5	5.12	INHIBITOR
THE HUMAN PROTEIN ATLAS	CEA cell adhesion molecule 6	Cell surface glycoprotein that plays a role in cell adhesion and tumor progression	37194.9	5.56	ADHESION
THE HUMAN PROTEIN ATLAS	CD44 molecule (Indian blood group)	Cell-surface receptor that plays a role in cell-cell interactions, cell adhesion and migration, helping them to sense and respond to changes in the tissue microenvironment 1, 2, 3. Participates thereby in a wide variety of cellular functions including the activation, recirculation and homing of T-lymphocytes, hematopoiesis, inflammation and response to bacterial infection 4. Engages, through its …	37277.7	5.3	RECEPTOR
THE HUMAN PROTEIN ATLAS	Thioredoxin interacting protein	May act as an oxidative stress mediator by inhibiting thioredoxin activity or by limiting its bioavailability 1. Interacts with COPS5 and restores COPS5-induced suppression of CDKN1B stability, blocking the COPS5-mediated translocation of CDKN1B from the nucleus to the cytoplasm (By similarity). Functions as a transcriptional repressor, possibly by acting as a bridge molecule between transcriptio…	37319	8,29	INHIBITOR
THE HUMAN PROTEIN ATLAS	Pre-mRNA processing factor 38A	Involved in pre-mRNA splicing as a component of the spliceosome.	37476.5	9.97	TRANSCRIPTION
THE HUMAN PROTEIN ATLAS	D-aspartate oxidase	Selectively catalyzes the oxidative deamination of D-aspartate and its N-methylated derivative, N-methyl D-aspartate.	37534.9	8.07	ENZYME
THE HUMAN PROTEIN ATLAS	Phytanoyl-CoA 2-hydroxylase interacting protein	Its interaction with PHYH suggests a role in the development of the core system	37565.5	6.39	CELLULAR ORGANIZATION
doi: 10.1007/978-3-319-49674-0_13	b-Fibrin	essential for hemostasis and are major factors in thrombosis, wound healing, and several other biological functions and pathological conditions.	37649	5.85	CELL FUNCTION REGULATOR
THE HUMAN PROTEIN ATLAS	ST8 alpha-N-acetyl-neuraminide alpha-2,8-sialyltransferase 2	Catalyzes the transfer of a sialic acid from a CMP-linked sialic acid donor onto a terminal alpha-2,3-, alpha-2,6-, or alpha-2,8-linked sialic acid of an N-linked glycan acceptor through alpha-2,8-linkages (Probable) 1, 2, 3, 4. Therefore, participates in polysialic acid synthesis on various sialylated N-acetyllactosaminyl oligosaccharides (alpha-2,3-, alpha-2,6-, or alpha-2,8-linked sialic acid)…	37664.6	9.31	CATALYTIC ACTIVITY
THE HUMAN PROTEIN ATLAS	Aryl hydrocarbon receptor interacting protein	May play a positive role in AHR-mediated (aromatic hydrocarbon receptor) signaling, possibly by influencing its receptivity for ligand and/or its nuclear targeting	37690.1	5.98	BIOMARKER
THE HUMAN PROTEIN ATLAS	Chromosome 12 open reading frame 29	Functions as an RNA ligase, in vitro 1. The ligation reaction entails three nucleotidyl transfer steps 2. In the first step, the RNA ligase reacts with ATP in the absence of nucleic acid to form a covalent ligase-AMP intermediate and release pyrophosphate 3. In step 2, the ligase-AMP binds to the nucleic acid and transfers the adenylate to the 5'-PO4 terminus to form an adenylylated intermediate …	37692	7.33	CATALYTIC ACTIVITY
THE HUMAN PROTEIN ATLAS	RIB43A domain with coiled-coils 2	Microtubule inner protein (MIP) part of the dynein-decorated doublet microtubules (DMTs) in cilia axoneme, which is required for motile cilia beating	37871.1	8.92	MOTOR
THE HUMAN PROTEIN ATLAS	Actin related protein 3B	Plays a role in the organization of the actin cytoskeleton. May function as ATP-binding component of the Arp2/3 complex which is involved in regulation of actin polymerization and together with an activating nucleation-promoting factor (NPF) mediates the formation of branched actin networks. May decrease the metastatic potential of tumors.	37899.6	5.97	CELL FUNCTION REGULATOR
THE HUMAN PROTEIN ATLAS	Taste 2 receptor member 38	Receptor that may play a role in the perception of bitterness and is gustducin-linked. May play a role in sensing the chemical composition of the gastrointestinal content. The activity of this receptor may stimulate alpha gustducin, mediate PLC-beta-2 activation and lead to the gating of TRPM5 (By similarity)	37920.5	9.6	RECEPTOR
THE HUMAN PROTEIN ATLAS	Chromosome 6 open reading frame 58	May be involved in early liver development.	37925.9	5.78	CELLULAR ORGANIZATION
THE HUMAN PROTEIN ATLAS	Solute carrier family 10 member 1	As a major transporter of conjugated bile salts from plasma into the hepatocyte, it plays a key role in the enterohepatic circulation of bile salts necessary for the solubilization and absorption of dietary fat and fat-soluble vitamins 1, 2, 3, 4. It is strictly dependent on the extracellular presence of sodium 5, 6, 7, 8. It exhibits broad substrate specificity and transports various bile acids,…	38119.1	9.07	CARRIER
THE HUMAN PROTEIN ATLAS	DNA polymerase beta	Repair polymerase that plays a key role in base-excision repair. Has 5'-deoxyribose-5-phosphate lyase (dRP lyase) activity that removes the 5' sugar phosphate and also acts as a DNA polymerase that adds one nucleotide to the 3' end of the arising single-nucleotide gap. Conducts 'gap-filling' DNA synthesis in a stepwise distributive fashion rather than in a processive fashion as for other DNA poly…	38177.6	9.01	ENZYME
PMID: 22825594 DOI: 10.1007/s00401-012-1019-z	LDL receptor member LR3	Acts as a coreceptor with members of the frizzled family of seven-transmembrane spanning receptors to transduce signal by Wnt proteins, Activates the canonical Wnt signaling pathway that controls cell fate determination and self-renewal during embryonic development and adult tissue regeneration	38177.9	6.45	SIGNAL
THE HUMAN PROTEIN ATLAS	Nuclear distribution C, dynein complex regulator	Plays a role in neurogenesis and neuronal migration (By similarity). Necessary for correct formation of mitotic spindles and chromosome separation during mitosis 1, 2, 3. Necessary for cytokinesis and cell proliferation	38242.9	5.27	CELL CYCLE
UNIPROT	β galactosidase precursor	β-Galactosidase instructed supramolecular assemblies of Low Molecular Weight Gelators (LMWGs) derived from glyconucleo-bolaamphiphiles have been designed. These precursors, comprising galactose sensitive units at both polar heads, showed the formation of hydrogels upon the action of β-galactosidase.	38298.2	8.34	ENZYME
THE HUMAN PROTEIN ATLAS	Monoacylglycerol O-acyltransferase 3	Catalyzes the formation of diacylglycerol from 2-monoacylglycerol and fatty acyl-CoA. Also able to catalyze the terminal step in triacylglycerol synthesis by using diacylglycerol and fatty acyl-CoA as substrates. Has a preference toward palmitoyl-CoA and oleoyl-CoA. May be involved in absorption of dietary fat in the small intestine by catalyzing the resynthesis of triacylglycerol in enterocytes.…	38352.7	9.68	ENZYME
THE HUMAN PROTEIN ATLAS	SUMO interacting motifs containing 1	Plays a role in SMC5-SMC6 complex recruitment for viral restriction. Forms a complex with SLF2 and this complex is required to recruit SMC5-SMC6 complex to PML nuclear bodies and sites of viral replication.	38363.4	8.96	CELLULAR ORGANIZATION
THE HUMAN PROTEIN ATLAS	NDRG family member 4	Contributes to the maintenance of intracerebral BDNF levels within the normal range, which is necessary for the preservation of spatial learning and the resistance to neuronal cell death caused by ischemic stress (By similarity). May enhance growth factor-induced ERK1 and ERK2 phosphorylation, including that induced by PDGF and FGF. May attenuate NGF-promoted ELK1 phosphorylation in a microtubule…	38458.7	5.79	CELL FUNCTION REGULATOR
THE HUMAN PROTEIN ATLAS	Tweety family member 3	Probable large-conductance Ca(2+)-activated chloride channel. May play a role in Ca(2+) signal transduction.	38486.2	5.91	CARRIER
THE HUMAN PROTEIN ATLAS	Serpin family B member 3	May act as a papain-like cysteine protease inhibitor to modulate the host immune response against tumor cells. Also functions as an inhibitor of UV-induced apoptosis via suppression of the activity of c-Jun NH(2)-terminal kinase (JNK1)	38549.6	6.28	INHIBITOR
PMID: 15221970 DOI: 10.1002/ijc.20267	Phosphatidylethanol amine binding protein	Binds ATP, opioids and phosphatidylethanolamine. Has lower affinity for phosphatidylinositol and phosphatidylcholine. Serine protease inhibitor which inhibits thrombin, neuropsin and chymotrypsin but not trypsin, tissue type plasminogen activator and elastase	38561.8	11.22	ADHESION
UNIPROT	Phosphatidylinositol transfer protein α isoform	Catalyzes the transfer of phosphatidylinositol (PI) and phosphatidylcholine (PC) between membranes	38561.8	11.22	CARRIER
UNIPROT	Basic proline-rich peptide IB1	General function(s) of a protein, Peptides IB-9 and P-E are the same peptide.	38561.8	11.22	IMMUNOLOGICAL
UNIPROT	Basic proline-rich peptide II-2	General function(s) of a protein, Peptides IB-9 and P-E are the same peptide.	38561.8	11.22	IMMUNOLOGICAL
PROSITE	Proline-rich protein PRB1/2S (fragment)	This gene encodes a member of the heterogeneous family of basic human salivary glycoproteins, rich in proline. The encoded preprotein undergoes proteolytic processing to generate one or more mature peptides prior to secretion by the parotid glands.	38561.8	11.22	IMMUNOLOGICAL
UNIPROT	Salivary proline-rich phosphoprotein	PRP's act as highly potent inhibitors of crystal growth of calcium phosphates. They provide a protective and reparative environment for dental enamel which is important for the integrity of the teeth.	38561.8	11.22	IMMUNOLOGICAL
UNIPROT	Salivary proline-rich protein 1	Conformational analyses of PRP1, a proline-rich acidic salivary protein and major component of the acquired enamel pellicle, have been carried out in solution and upon binding to two enamel prototypes, hydroxyapatite (HA) and carbonated hydroxyapatite (CHA), using Fourier transform infrared spectroscopy (FTIR) in attenuated total reflection (ATR) mode.	38561.8	11.22	IMMUNOLOGICAL
THE HUMAN PROTEIN ATLAS	Y-box binding protein 2	Major constituent of messenger ribonucleoprotein particles (mRNPs). Involved in the regulation of the stability and/or translation of germ cell mRNAs.	38570.1	10.8	CELL FUNCTION REGULATOR
THE HUMAN PROTEIN ATLAS	Mitochondrial ribosomal protein L3	Ribonucleoprotein, Ribosomal protein	38632.6	9.52	CELL FUNCTION REGULATOR
THE HUMAN PROTEIN ATLAS	Olfactory receptor family 13 subfamily C member 3	Odorant receptor	38697.4	8.83	RECEPTOR
THE HUMAN PROTEIN ATLAS	Family with sequence similarity 50 member B	This gene contains an intronless ORF that arose from ancestral retroposition. The encoded protein is related to a plant protein that plays a role in the circadian clock. This gene is adjacent to a differentially methylated region (DMR) and is imprinted and paternally expressed in many tissues.	38708.7	8.9	CELL FUNCTION REGULATOR
PMID: 21695141 DOI: 10.1371/journal.pone.0020757	Liprin α1	Liprin-α1 may interact with different proteins, and the functional significance of these interactions in the regulation of cell motility is poorly known.	38714.2	6.57	ADHESION
THE HUMAN PROTEIN ATLAS	Centrosomal Nek2-associated protein	DVL accumulates during the cell cycle and associates with NIMA-related kinase 2 (NEK2), which is able to phosphorylate DVL at a multitude of residues, as detected by a set of novel phospho-specific antibodies. This creates interfaces for efficient binding to CDK5 regulatory subunit-associated protein 2 (CDK5RAP2) and centrosomal Nek2-associated protein 1 (C-NAP1), two proteins of the centrosomal …	38714.2	6.57	CELL FUNCTION REGULATOR
THE HUMAN PROTEIN ATLAS	MAGE family member C3	Tumor antigen	38806.8	4,50	BIOMARKER
THE HUMAN PROTEIN ATLAS	Matrix metallopeptidase 11	May play an important role in the progression of epithelial malignancies	38810.9	5.89	ENZYME
THE HUMAN PROTEIN ATLAS	Reticulocalbin 1	May regulate calcium-dependent activities in the endoplasmic reticulum lumen or post-ER compartment.	38890	4.86	ADHESION
THE HUMAN PROTEIN ATLAS	Wnt family member 7A	Ligand for members of the frizzled family of seven transmembrane receptors that functions in the canonical Wnt/beta-catenin signaling pathway. Plays an important role in embryonic development, including dorsal versus ventral patterning during limb development, skeleton development and urogenital tract development	39004.9	9.05	CELL CYCLE
UNIPROT	Platelet-derived growth factor C	Growth factor that plays an essential role in the regulation of embryonic development, cell proliferation, cell migration, survival and chemotaxis. Potent mitogen for cells of mesenchymal origin. Required for normal lung alveolar septum formation during embryogenesis, normal development of the gastrointestinal tract, normal development of Leydig cells and spermatogenesis. Required for normal olig…	39029.4	5.77	CELL CYCLE
THE HUMAN PROTEIN ATLAS	Endoplasmic reticulum metallopeptidase 1	Within the ovary, required for the organization of somatic cells and oocytes into discrete follicular structures.	39208.7	7.69	CELLULAR ORGANIZATION
THE HUMAN PROTEIN ATLAS	Solute carrier family 22 member 1	Electrogenic voltage-dependent transporter that mediates the transport of a variety of organic cations such as endogenous bioactive amines, cationic drugs and xenobiotics 1, 2, 3, 4, 5, 6, 7, 8, 9, 10, 11, 12, 13, 14, 15, 16. Functions as a pH- and Na(+)-independent, bidirectional transporter (By similarity). Cation cellular uptake or release is driven by the electrochemical potential (i.e. membr…	39223.7	6.52	CARRIER
THE HUMAN PROTEIN ATLAS	Solute carrier family 13 member 2	Low-affinity sodium-dicarboxylate cotransporter, that mediates the entry of citric acid cycle intermediates, such as succinate, citrate, fumarate and alpha-ketoglutarate (2-oxoglutarate) into the small intestine and renal proximal tubule 1, 2, 3. Transports the dicarboxylate into the cell with a probable stoichiometry of 3 Na(+) for 1 divalent dicarboxylate, rendering the process electrogenic 4, …	39256.9	6.5	CARRIER
UNIPROT	α-1-antitrypsin	Inhibitor of serine proteases. Its primary target is elastase, but it also has a moderate affinity for plasmin and thrombin. Irreversibly inhibits trypsin, chymotrypsin and plasminogen activator. The aberrant form inhibits insulin-induced NO synthesis in platelets, decreases coagulation time and has proteolytic activity against insulin and plasmin.	39324.7	5.43	IMMUNOLOGICAL
THE HUMAN PROTEIN ATLAS	CD2 molecule	CD2 interacts with lymphocyte function-associated antigen CD58 (LFA-3) and CD48/BCM1 to mediate adhesion between T-cells and other cell types. CD2 is implicated in the triggering of T-cells, the cytoplasmic domain is implicated in the signaling function.	39439.2	9.66	ADHESION
UNIPROT	G protein-coupled receptor kinase	G protein-coupled receptors (GPCRs) are critical cellular sensors that mediate numerous physiological processes. In the heart, multiple GPCRs are expressed on various cell types, where they coordinate to regulate cardiac function by modulating critical processes such as contractility and blood flow.	39441.8	6.41	RECEPTOR
THE HUMAN PROTEIN ATLAS	Cytidine/uridine monophosphate kinase 2	Mitochondrial nucleotide monophosphate kinase needed for salvage dNTP synthesis that mediates immunomodulatory and antiviral activities through IFN-dependent and IFN-independent pathways 1, 2, 3, 4. Restricts the replication of multiple viruses including flaviviruses or coronaviruses 5, 6, 7. Together with viperin/RSAD2 and ddhCTP, suppresses the replication of several coronaviruses through inhib…	39561.5	7.05	INHIBITOR
THE HUMAN PROTEIN ATLAS	RAD23 homolog A, nucleotide excision repair protein	Multiubiquitin chain receptor involved in modulation of proteasomal degradation. Binds to 'Lys-48'-linked polyubiquitin chains in a length-dependent manner and with a lower affinity to 'Lys-63'- linked polyubiquitin chains. Proposed to be capable to bind simultaneously to the 26S proteasome and to polyubiquitinated substrates and to deliver ubiquitinated proteins to the proteasome.	39609.2	4.54	RECEPTOR
THE HUMAN PROTEIN ATLAS	Tetratricopeptide repeat domain 31	UNSPECIFIC	39709	5.58	UNSPECIFIC
UNIPROT	Tetratricopeptide repeat domain 31	UNSPECIFIC	39709	5.58	UNSPECIFIC
THE HUMAN PROTEIN ATLAS	TRNA methyltransferase 10A	S-adenosyl-L-methionine-dependent guanine N(1)- methyltransferase that catalyzes the formation of N(1)-methylguanine at position 9 (m1G9) in tRNAs 1, 2. Probably not able to catalyze formation of N(1)-methyladenine at position 9 (m1A9) in tRNAs 3.	39718.7	7.29	CATALYTIC ACTIVITY
UNIPROT	TRNA methyltransferase 10A	S-adenosyl-L-methionine-dependent guanine N(1)- methyltransferase that catalyzes the formation of N(1)-methylguanine at position 9 (m1G9) in tRNAs 1, 2. Probably not able to catalyze formation of N(1)-methyladenine at position 9 (m1A9) in tRNAs 3.	39718.7	7.29	CATALYTIC ACTIVITY
THE HUMAN PROTEIN ATLAS	CD33 molecule	Sialic-acid-binding immunoglobulin-like lectin (Siglec) that plays a role in mediating cell-cell interactions and in maintaining immune cells in a resting state	39726.1	8.53	ADHESION
THE HUMAN PROTEIN ATLAS	G protein-coupled receptor 160	Orphan receptor.	39786.7	8.84	RECEPTOR
THE HUMAN PROTEIN ATLAS	GDP-mannose pyrophosphorylase B	Catalyzes the formation of GDP-mannose, an essential precursor of glycan moieties of glycoproteins and glycolipids.	39862.5	6.33	ENZYME
PROSITE	Protein c20orf172	Antibody Production	40007.1	6.57	IMMUNOLOGICAL
THE HUMAN PROTEIN ATLAS	Chitinase acidic	Degrades chitin and chitotriose. May participate in the defense against nematodes, fungi and other pathogens.	40022.5	5.15	IMMUNOLOGICAL
THE HUMAN PROTEIN ATLAS	Coiled-coil domain containing 82	UNSPECIFIC	40028.1	4.58	UNSPECIFIC
THE HUMAN PROTEIN ATLAS	Globoside alpha-1,3-N-acetylgalactosaminyltransferase 1 (FORS blood group)	Might have acquired an alternative function in glycosphingolipid metabolism, but it remains to be established. It appears to have drifted more slowly than confirmed pseudogenes in the glycosyltransferase 6 family, suggesting that it has remained under evolutionary pressure.	40127.3	8.68	ENZYME
UNIPROT	β2-glycoprotein I	β2-glycoprotein I exhibits direct interaction with membrane Toll-like receptors, and through this interaction, the complex of β2-glycoprotein I and its antibodies induces intracellular signals via Toll-like receptors, resulting in activation of endothelial cells and monocytes, and expression of proinflammatory cytokines.	40172.8	8.59	IMMUNOLOGICAL
THE HUMAN PROTEIN ATLAS	Oxysterol binding protein like 7	Lipid transport, Transport	40185.6	9.64	CELLULAR ORGANIZATION
PMID: 31020669 DOI: 10.1002/JPER.18-0195	DnaK-type molecular chaperone	ADAMTS (a disintegrin-like and metalloproteinase with thrombospondin) are a family of proteinases that are structurally similar to the family of matrix metalloproteinases with critical roles in damage and repair of the extracellular matrix. Their functions are closely related to inflammation, hypoxia, and vascularization.	40197.3	8.55	INFLAMMATORY
THE HUMAN PROTEIN ATLAS	Keratin 17	Type I keratin involved in the formation and maintenance of various skin appendages, specifically in determining shape and orientation of hair (By similarity). Required for the correct growth of hair follicles, in particular for the persistence of the anagen (growth) state (By similarity). Modulates the function of TNF-alpha in the specific context of hair cycling. Regulates protein synthesis and…	40216.4	4,90	CELLULAR ORGANIZATION
THE HUMAN PROTEIN ATLAS	OTU deubiquitinase with linear linkage specificity	Deubiquitinase that specifically removes linear ('Met-1'- linked) polyubiquitin chains to substrates and acts as a regulator of angiogenesis and innate immune response 1, 2, 3, 4, 5, 6, 7, 8, 9, 10. Required during angiogenesis, craniofacial and neuronal development by regulating the canonical Wnt signaling together with the LUBAC complex 11. Acts as a negative regulator of NF-kappa-B by regulati…	40262.9	5.35	IMMUNOLOGICAL
THE HUMAN PROTEIN ATLAS	Heparan sulfate-glucosamine 3-sulfotransferase 5	Sulfotransferase that utilizes 3'-phospho-5'-adenylyl sulfate (PAPS) to catalyze the transfer of a sulfo group to position 3 of glucosamine residues in heparan.	40408.2	9.8	ENZYME
THE HUMAN PROTEIN ATLAS	Fc receptor like 1	May function as an activating coreceptor in B-cells. May function in B-cells activation and differentiation.	40434.8	6.46	ACTIVATOR
STRING	Cholinergic receptor muscarinic 3	The muscarinic acetylcholine receptor mediates various cellular responses, including inhibition of adenylate cyclase, breakdown of phosphoinositides and modulation of potassium channels through the action of G proteins. Primary transducing effect is Pi turnover.	40449.7	4.76	RECEPTOR
THE HUMAN PROTEIN ATLAS	Dynein assembly factor with WD repeats 1	May play a role in axonemal outer row dynein assembly.	40515.1	5.95	CELLULAR ORGANIZATION
THE HUMAN PROTEIN ATLAS	Delta like non-canonical Notch ligand 2	Regulates adipogenesis.	40547.6	6.09	CELL FUNCTION REGULATOR
UNIPROT	Tropomodulin-1	Blocks the elongation and depolymerization of the actin filaments at the pointed end. The Tmod/TM complex contributes to the formation of the short actin protofilament, which in turn defines the geometry of the membrane skeleton. May play an important role in regulating the organization of actin filaments by preferentially binding to a specific tropomyosin isoform at its N-terminus.	40569.2	5.03	ADHESION
THE HUMAN PROTEIN ATLAS	Purinergic receptor P2X 5	Receptor for ATP that acts as a ligand-gated ion channel.	40647.9	6.72	RECEPTOR
THE HUMAN PROTEIN ATLAS	Transcription factor AP-2 beta	Sequence-specific DNA-binding protein that interacts with inducible viral and cellular enhancer elements to regulate transcription of selected genes	40657.9	9.22	ACTIVATOR
THE HUMAN PROTEIN ATLAS	Cyclin I family member 2	Predicted to enable cyclin-dependent protein serine/threonine kinase regulator activity. Predicted to be involved in mitotic cell cycle phase transition and regulation of cyclin-dependent protein serine/threonine kinase activity. Predicted to be part of cyclin-dependent protein kinase holoenzyme complex. Predicted to be active in cytoplasm and nucleus	40749.9	8.07	CELL CYCLE
PROSITE	Interleukin-8 receptor type B	Transporter family	40759.3	8.66	CARRIER
THE HUMAN PROTEIN ATLAS	Zinc finger B-box domain containing	Predicted to enable zinc ion binding activity. Predicted to be involved in cilium movement. Predicted to be active in motile cilium. [provided by Alliance of Genome Resources, Apr 2022]	40764	9.24	ADHESION
UNIPROT	Zinc finger B-box domain containing	Predicted to enable zinc ion binding activity. Predicted to be involved in cilium movement. Predicted to be active in motile cilium. [provided by Alliance of Genome Resources, Apr 2022]	40764	9.24	STRUCTURAL
THE HUMAN PROTEIN ATLAS	DUS4L-BCAP29 readthrough	May play a role in anterograde transport of membrane proteins from the endoplasmic reticulum to the Golgi. May be involved in CASP8-mediated apoptosis (By similarity).	40797	9.74	TRANSCRIPTION
UNIPROT	Salivary peroxidase	Antimicrobial agent which utilizes hydrogen peroxide and thiocyanate (SCN) to generate the antimicrobial substance hypothiocyanous acid (HOSCN) (By similarity). May contribute to airway host defense against infection	40809.3	11.63	ANTIMICROBIAL
PMID: 33693003 DOI: 10.3389/fcell.2021.634242	Bactericidal/permeability_x0002_increasing protein-like 1 (LPLUNC2)	Catalyzes the ATP-dependent transport of phospholipids such as phosphatidylcholine and phosphoglycerol from the cytoplasm into the lumen side of lamellar bodies, in turn participates in the lamellar bodies biogenesis and homeostasis of pulmonary surfactant	40809.3	11.63	CARRIER
UNIPROT	Basic proline-rich peptide IB-6	Acts as an endocytic receptor to direct captured antigens from the extracellular space to a specialized antigen-processing compartment. Causes reduced proliferation of B-lymphocytes	40809.3	11.63	IMMUNOLOGICAL
PMID: 8782063 DOI: 10.1006/jmcc.1996.0112	Basic proline-rich peptide IB8 (P-C)	PRP's act as highly potent inhibitors of crystal growth of calcium phosphates. They provide a protective and reparative environment for dental enamel which is important for the integrity of the teeth.	40809.3	11.63	IMMUNOLOGICAL
PMID: 31186538 DOI: 10.1038/s41569-019-0220-3	Salivary proline-rich protein (clone CP7)	The nucleotide sequences of cDNAs coding for human salivary proline-rich proteins (PRPs) were determined. Clones cP3 to cP7 contain repetitive regions in which BstNI sites occur repeatedly; they code for precursors of basic and glycosylated PRPs.	40809.3	11.63	IMMUNOLOGICAL
UNIPROT	Salivary proline-rich protein (clones CP3, CP4, CP5)	The nucleotide sequences of cDNAs coding for human salivary proline-rich proteins (PRPs) were determined. Clones cP1 and cP2 contain repetitive regions in which sites for the restriction enzyme HaeIII occur repeatedly; they code for the precursors of acidic PRPs. Clones cP3 to cP7 contain repetitive regions in which BstNI sites occur repeatedly; they code for precursors of basic and glycosylated …	40809.3	11.63	IMMUNOLOGICAL
THE HUMAN PROTEIN ATLAS	Purinergic receptor P2Y13	Receptor for ADP. Coupled to G(i)-proteins. May play a role in hematopoiesis and the immune system.	40818.8	9.94	RECEPTOR
THE HUMAN PROTEIN ATLAS	Tetratricopeptide repeat domain 23 like	Predicted to be located in cytoplasm; microtubule cytoskeleton; and midbody. [provided by Alliance of Genome Resources, Apr 2022]	40855.6	7.10	STRUCTURAL
UNIPROT	Tetratricopeptide repeat domain 23 like	Predicted to be located in cytoplasm; microtubule cytoskeleton; and midbody. [provided by Alliance of Genome Resources, Apr 2022]	40855.6	7.10	STRUCTURAL
THE HUMAN PROTEIN ATLAS	TSC22 domain family member 4	Binds DNA and acts as a transcriptional repressor 1. Involved in the regulation of systematic glucose homeostasis and insulin sensitivity, via transcriptional repression of downstream insulin signaling targets such as OBP2A/LCN13 (By similarity). Acts as a negative regulator of lipogenic gene expression in hepatocytes and thereby mediates the control of very low-density lipoprotein release 2. May…	41026	6.69	INHIBITOR
UNIPROT	TSC22 domain family member 4	Binds DNA and acts as a transcriptional repressor 1. Involved in the regulation of systematic glucose homeostasis and insulin sensitivity, via transcriptional repression of downstream insulin signaling targets such as OBP2A/LCN13 (By similarity). Acts as a negative regulator of lipogenic gene expression in hepatocytes and thereby mediates the control of very low-density lipoprotein release 2. May…	41026	6.69	INHIBITOR
THE HUMAN PROTEIN ATLAS	Keratin 8	Together with KRT19, helps to link the contractile apparatus to dystrophin at the costameres of striated muscle.	41108	4,94	MOTOR
THE HUMAN PROTEIN ATLAS	Periphilin 1	Component of the HUSH complex, a multiprotein complex that mediates epigenetic repression. The HUSH complex is recruited to genomic loci rich in H3K9me3 and is probably required to maintain transcriptional silencing by promoting recruitment of SETDB1, a histone methyltransferase that mediates further deposition of H3K9me3. In the HUSH complex, contributes to the maintenance of the complex at chro…	41125.7	8.65	CELL FUNCTION REGULATOR
THE HUMAN PROTEIN ATLAS	Coiled-coil domain containing 18	UNSPECIFIC	41278.4	5.64	UNSPECIFIC
UNIPROT	Ig α-4 chain C region	Constant region of immunoglobulin heavy chains. Immunoglobulins, also known as antibodies, are membrane-bound or secreted glycoproteins produced by B lymphocytes. In the recognition phase of humoral immunity, the membrane-bound immunoglobulins serve as receptors which, upon binding of a specific antigen, trigger the clonal expansion and differentiation of B lymphocytes into immunoglobulins-secret…	41287	8.23	IMMUNOLOGICAL
THE HUMAN PROTEIN ATLAS	C-C motif chemokine receptor 4	Can function as a chemoattractant homing receptor on circulating memory lymphocytes and as a coreceptor for some primary HIV-2 isolates. In the CNS, could mediate hippocampal-neuron survival.	41402.8	7.47	INFLAMMATORY
THE HUMAN PROTEIN ATLAS	Blood vessel epicardial substance	Cell adhesion molecule involved in the establishment and/or maintenance of cell integrity. Involved in the formation and regulation of the tight junction (TJ) paracellular permeability barrier in epithelial cells	41451	8.02	ADHESION
THE HUMAN PROTEIN ATLAS	Methyltransferase like 24	Probable methyltransferase.	41458.2	9,47	ACTIVATOR
THE HUMAN PROTEIN ATLAS	Beta-1,3-N-acetylgalactosaminyltransferase 2	Beta-1,3-N-acetylgalactosaminyltransferase that synthesizes a unique carbohydrate structure, GalNAc-beta-1-3GlcNAc, on N- and O-glycans. Has no galactose nor galactosaminyl transferase activity toward any acceptor substrate. Involved in alpha-dystroglycan (DAG1) glycosylation: acts coordinately with GTDC2/POMGnT2 to synthesize a GalNAc-beta3-GlcNAc-beta-terminus at the 4-position of protein O-man…	41702.6	8.39	ENZYME
THE HUMAN PROTEIN ATLAS	Deoxyribonuclease 2 beta	Hydrolyzes DNA under acidic conditions. Does not require divalent cations for activity. Participates in the degradation of nuclear DNA during lens cell differentiation.	41712.7	9.4	ENZYME
THE HUMAN PROTEIN ATLAS	HD domain containing 2	(UniProt)i Catalyzes the dephosphorylation of the nucleoside 5'- monophosphates deoxyadenosine monophosphate (dAMP), deoxycytidine monophosphate (dCMP), deoxyguanosine monophosphate (dGMP) and deoxythymidine monophosphate (dTMP).	41757.6	5.36	ENZYME
THE HUMAN PROTEIN ATLAS	Histone deacetylase 8	Histone deacetylase that catalyzes the deacetylation of lysine residues on the N-terminal part of the core histones (H2A, H2B, H3 and H4)	41757.6	5.36	ENZYME
THE HUMAN PROTEIN ATLAS	DnaJ heat shock protein family (Hsp40) member B12	Acts as a co-chaperone with HSPA8/Hsc70; required to promote protein folding and trafficking, prevent aggregation of client proteins, and promote unfolded proteins to endoplasmic reticulum-associated degradation (ERAD) pathway	41859.8	8.81	CELLULAR ORGANIZATION
PMID: 7622062 DOI: 10.1016/0378-1119(95)00180-e	RecQ protein-like, isoform 1	Until now it was assumed that the murine poliovirus (PV) receptor homolog gene (MPH) had been identified. Using a degenerate PCR strategy, we describe the identification of a second human PVR-related gene (PRR2), which encodes two glycoproteins, PRR2 alpha (short form) and PRR2 delta (long form).	41860.9	8.75	REPAIRING
THE HUMAN PROTEIN ATLAS	Zinc finger DHHC-type containing 11B	Probable palmitoyltransferase that could catalyze the addition of palmitate onto various protein substrates and be involved in a variety of cellular processes (By similarity). May play a role in cell proliferation 1	41894.8	8.88	CATALYTIC ACTIVITY
UNIPROT	Zinc finger DHHC-type containing 11B	Probable palmitoyltransferase that could catalyze the addition of palmitate onto various protein substrates and be involved in a variety of cellular processes (By similarity). May play a role in cell proliferation 1	41894.8	8.88	CATALYTIC ACTIVITY
THE HUMAN PROTEIN ATLAS	Phosphate cytidylyltransferase 1, choline, beta	Isoform 1]: Catalyzes the key rate-limiting step in the CDP-choline pathway for phosphatidylcholine biosynthesis.	41940.2	5.99	ENZYME
THE HUMAN PROTEIN ATLAS	GDP-mannose 4,6-dehydratase	Catalyzes the conversion of GDP-D-mannose to GDP-4-dehydro-6-deoxy-D-mannose.	41949.7	6,87	CATALYTIC ACTIVITY
THE HUMAN PROTEIN ATLAS	Shroom family member 2	May be involved in endothelial cell morphology changes during cell spreading. In the retinal pigment epithelium, may regulate the biogenesis of melanosomes and promote their association with the apical cell surface by inducing gamma-tubulin redistribution (By similarity).	41976.6	5.2	MOTOR
THE HUMAN PROTEIN ATLAS	Actin related protein 3	ATP-binding component of the Arp2/3 complex, a multiprotein complex that mediates actin polymerization upon stimulation by nucleation-promoting factor (NPF)	42004	5.41	CELL FUNCTION REGULATOR
PMID: 31263835	Actin β	Actin is a highly conserved protein that polymerizes to produce filaments that form cross-linked networks in the cytoplasm of cells	42051	5.23	MOTOR
THE HUMAN PROTEIN ATLAS	Angel homolog 2	It allows mRNA binding activity in the 3'-UTR. It is involved in 3'-UTR-mediated mRNA stabilization and mitotic cell cycle downregulation. It is found in the body of Cajal and the cytoplasm	42106.2	6.1	CELL FUNCTION REGULATOR
THE HUMAN PROTEIN ATLAS	OTU deubiquitinase with linear linkage specificity like	Carece de actividad desubiquitinasa.	42195.9	9.36	ENZYME
THE HUMAN PROTEIN ATLAS	Alsin Rho guanine nucleotide exchange factor ALS2	May act as a GTPase regulator. Controls survival and growth of spinal motoneurons	42661.1	4.96	BIOMARKER
THE HUMAN PROTEIN ATLAS	Mucosal vascular addressin cell adhesion molecule 1	Cell adhesion leukocyte receptor expressed by mucosal venules, helps to direct lymphocyte traffic into mucosal tissues including the Peyer patches and the intestinal lamina propria. It can bind both integrin alpha-4/beta-7 and L-selectin, regulating both the passage and retention of leukocytes. Isoform 2, lacking the mucin-like domain, may be specialized in supporting integrin alpha-4/beta-7-depe…	42690.8	4,77	RECEPTOR
PMID: 30901933 DOI: 10.3390/ijms20061443	Lactoperoxidase	Lactoperoxidase (LPO) present in saliva are an important element of the nonspecific immune response involved in maintaining oral health. The main role of this enzyme is to oxidize salivary thiocyanate ions (SCN-) in the presence of hydrogen peroxide (H₂O₂) to products that exhibit antimicrobial activity.	42741.8	5.9	IMMUNOLOGICAL
THE HUMAN PROTEIN ATLAS	Migration and invasion inhibitory protein	Inhibits glioma cells invasion and down-regulates adhesion- and motility-associated genes such as NFKB2 and ICAM1. Exhibits opposing effects to IGFBP2 on cell invasion	42811	8.05	INHIBITOR
UNIPROT	Ubiquitin specific peptidase 12	Deubiquitinating enzyme that plays various roles in the regulation of the immune response and inflammation 1, 2. In complex with WDR48, acts as a potential tumor suppressor by positively regulating PHLPP1 stability 3. During TCR engagement and activation, translocates into the cytoplasm and deubiquitinates its substrates LAT and TRAT1 and prevents their lysosome-dependent degradation to stabilize…	42817.9	6.10	IMMUNOLOGICAL
THE HUMAN PROTEIN ATLAS	Ubiquitin specific peptidase 12	Deubiquitinating enzyme that plays various roles in the regulation of the immune response and inflammation 1, 2. In complex with WDR48, acts as a potential tumor suppressor by positively regulating PHLPP1 stability 3. During TCR engagement and activation, translocates into the cytoplasm and deubiquitinates its substrates LAT and TRAT1 and prevents their lysosome-dependent degradation to stabilize…	42817.9	6.10	IMMUNOLOGICAL
THE HUMAN PROTEIN ATLAS	MANSC domain containing 1	Predicted to be integral component of membrane. [provided by Alliance of Genome Resources, Apr 2022]	43050.6	5,93	STRUCTURAL
THE HUMAN PROTEIN ATLAS	Protein kinase cAMP-dependent type I regulatory subunit beta	Regulatory subunit of the cAMP-dependent protein kinases involved in cAMP signaling in cells.	43072.9	5.53	SIGNAL
THE HUMAN PROTEIN ATLAS	Transmembrane serine protease 11A	Probable serine protease which may play a role in cellular senescence. Overexpression inhibits cell growth and induce G1 cell cycle arrest.	43225.7	9,32	INHIBITOR
THE HUMAN PROTEIN ATLAS	Translocation associated membrane protein 2	Necessary for collagen type I synthesis. May couple the activity of the ER Ca(2+) pump SERCA2B with the activity of the translocon. This coupling may increase the local Ca(2+) concentration at the site of collagen synthesis, and a high Ca(2+) concentration may be necessary for the function of molecular chaperones involved in collagen folding. Required for proper insertion of the first transmembra…	43327.8	9,32	CELLULAR ORGANIZATION
UNIPROT	Mucin 7 precursor	May function in a protective capacity by promoting the clearance of bacteria in the oral cavity and aiding in mastication, speech, and swallowing.	43646.7	9.11	ANTIMICROBIAL
THE HUMAN PROTEIN ATLAS	Thioredoxin interacting protein	May act as an oxidative stress mediator by inhibiting thioredoxin activity or by limiting its bioavailability 1. Interacts with COPS5 and restores COPS5-induced suppression of CDKN1B stability, blocking the COPS5-mediated translocation of CDKN1B from the nucleus to the cytoplasm (By similarity). Functions as a transcriptional repressor, possibly by acting as a bridge molecule between transcriptio…	43661.4	7.46	INHIBITOR
THE HUMAN PROTEIN ATLAS	Thioredoxin interacting protein	May act as an oxidative stress mediator by inhibiting thioredoxin activity or by limiting its bioavailability 1. Interacts with COPS5 and restores COPS5-induced suppression of CDKN1B stability, blocking the COPS5-mediated translocation of CDKN1B from the nucleus to the cytoplasm (By similarity). Functions as a transcriptional repressor, possibly by acting as a bridge molecule between transcriptio…	43661.4	7.46	INHIBITOR
UNIPROT	Thioredoxin interacting protein	May act as an oxidative stress mediator by inhibiting thioredoxin activity or by limiting its bioavailability 1. Interacts with COPS5 and restores COPS5-induced suppression of CDKN1B stability, blocking the COPS5-mediated translocation of CDKN1B from the nucleus to the cytoplasm (By similarity). Functions as a transcriptional repressor, possibly by acting as a bridge molecule between transcriptio…	43661.4	7.46	INHIBITOR
UNIPROT	Thioredoxin interacting protein	May act as an oxidative stress mediator by inhibiting thioredoxin activity or by limiting its bioavailability 1. Interacts with COPS5 and restores COPS5-induced suppression of CDKN1B stability, blocking the COPS5-mediated translocation of CDKN1B from the nucleus to the cytoplasm (By similarity). Functions as a transcriptional repressor, possibly by acting as a bridge molecule between transcriptio…	43661.4	7.46	INHIBITOR
THE HUMAN PROTEIN ATLAS	DNA methyltransferase 3 like	Catalytically inactive regulatory factor of DNA methyltransferases that can either promote or inhibit DNA methylation depending on the context (By similarity)	43669.9	5.59	ENZYME
THE HUMAN PROTEIN ATLAS	GDP-mannose pyrophosphorylase A	May serve as a regulatory subunit and allow allosteric feedback inhibition of GMPPB by GDP-mannose.	43685	6.7	INHIBITOR
THE HUMAN PROTEIN ATLAS	Cytochrome c oxidase assembly homolog COX15	May be involved in the biosynthesis of heme A.	43801.4	9.69	ENZYME
THE HUMAN PROTEIN ATLAS	Serine/threonine kinase 35	Kinase, Serine/threonine-protein kinase, Transferase	43911.4	9.2	STRUCTURAL
PMID: 22660413 DOI: 10.1038/ncb2502	Tumor susceptibility gene 101 protein	Required for completion of cytokinesis; the function requires CEP55. May be involved in cell growth and differentiation. Acts as a negative growth regulator. Involved in the budding of many viruses through an interaction with viral proteins that contain a late-budding motif P-[ST]-A-P. This interaction is essential for viral particle budding of numerous retroviruses. Required for the exosomal rel…	43944.3	6.06	ADHESION
THE HUMAN PROTEIN ATLAS	Neurexin 3	Neuronal cell surface protein that may be involved in cell recognition and cell adhesion. May play a role in angiogenesis (By similarity). [Q9HDB5] Neuronal cell surface protein that may be involved in cell recognition and cell adhesion. May mediate intracellular signaling. [Q9Y4C0]	43954.4	9.33	ADHESION
THE HUMAN PROTEIN ATLAS	Keratin 19	Involved in the organization of myofibers. Together with KRT8, helps to link the contractile apparatus to dystrophin at the costameres of striated muscle.	44052.9	5,00	CELLULAR ORGANIZATION
THE HUMAN PROTEIN ATLAS	Carbohydrate sulfotransferase 6	(UniProt)i Sulfotransferase that utilizes 3'-phospho-5'-adenylyl sulfate (PAPS) as sulfonate donor to catalyze the transfer of sulfate to position 6 of non-reducing N-acetylglucosamine (GlcNAc) residues of kerata	44098.9	10.03	ENZYME
UNIPROT	Keratin, type I cytoskeletal 19	Involved in the organization of myofibers. Together with KRT8, helps to link the contractile apparatus to dystrophin at the costameres of striated muscle	44106	5.05	CELLULAR ORGANIZATION
THE HUMAN PROTEIN ATLAS	Hydroxysteroid 11-beta dehydrogenase 2	Catalyzes the conversion of biologically active 11beta-hydroxyglucocorticoids ketoglucocorticoids (11-oxosteroid) such as cortisone, in the presence of NAD(+)	44114.6	9.42	METABOLIC
THE HUMAN PROTEIN ATLAS	Solute carrier family 35 member D3	Probable UDP-glucose transmembrane transporter involved in UDP-glucose transport from the cytosol to the lumen of synaptic vesicles 1. It is involved in platelet dense granules maturation (By similarity)	44182.5	6.94	CARRIER
PMID: 12203946 DOI: 10.1002/dmrr.315	α2-HS-glycoprotein	Alpha2-HS glycoprotein, a putative inhibitor of tyrosine kinase,prevents glucose toxicity associated with cardiomyocyte dysfunction’.	44354.9	4.54	INHIBITOR
THE HUMAN PROTEIN ATLAS	B-box and SPRY domain containing	May regulate epithelial calcium transport by inhibiting TRPV5 activity.	44381.2	5.99	CARRIER
THE HUMAN PROTEIN ATLAS	Bradykinin receptor B2	Receptor for bradykinin. It is associated with G proteins that activate a phosphatidylinositol-calcium second messenger system	44460.6	8.5	CARRIER
THE HUMAN PROTEIN ATLAS	Methyltransferase 22, Kin17 lysine	Protein N-lysine methyltransferase. Trimethylates KIN at Lys-135 (in vitro).	44486.2	4,90	TRANSCRIPTION
THE HUMAN PROTEIN ATLAS	Terminal nucleotidyltransferase 5D	Catalyzes the transfer of one adenosine molecule from an ATP to an mRNA poly(A) tail bearing a 3'-OH terminal group.	44499.6	6.17	CATALYTIC ACTIVITY
PMID: 29358956 DOI: 10.1155/2017/6301385	MTG16	MTG16 (myeloid translocation gene on chromosome 16) and its related proteins, MTG8 and MTGR1, define a small family of transcriptional corepressors. These corepressors share highly conserved domain structures yet have distinct biological functions and tissue specificity. In vivo studies have shown that, of the three MTG corepressors, MTG16 is uniquely important for the regulation of hematopoietic…	44552.2	6.1	BIOMARKER
UNIPROT	Serpin B3	May act as a papain-like cysteine protease inhibitor to modulate the host immune response against tumor cells. Also functions as an inhibitor of UV-induced apoptosis via suppression of the activity of c-Jun NH2-terminal kinase	44564.6	6.35	INHIBITOR
THE HUMAN PROTEIN ATLAS	Neutrophil cytosolic factor 1	NCF2, NCF1, and a membrane bound cytochrome b558 are required for activation of the latent NADPH oxidase (necessary for superoxide production)	44651.8	9.2	CELL FUNCTION REGULATOR
UNIPROT	Zinc finger protein 121	Predicted to enable DNA-binding transcription factor activity, RNA polymerase II-specific and RNA polymerase II cis-regulatory region sequence-specific DNA binding activity. Predicted to be involved in regulation of transcription by RNA polymerase II. Predicted to be active in nucleus. [provided by Alliance of Genome Resources, Apr 2022]	44694.4	8.37	TRANSCRIPTION
THE HUMAN PROTEIN ATLAS	Zinc finger protein 121	Predicted to enable DNA-binding transcription factor activity, RNA polymerase II-specific and RNA polymerase II cis-regulatory region sequence-specific DNA binding activity. Predicted to be involved in regulation of transcription by RNA polymerase II. Predicted to be active in nucleus. [provided by Alliance of Genome Resources, Apr 2022]	44694.4	8.37	TRANSCRIPTION
THE HUMAN PROTEIN ATLAS	LanC like glutathione S-transferase 1	Functions as a glutathione transferase. Catalyzes conjugation of the glutathione (GSH) to artificial substrates 1-chloro-2,4-dinitrobenzene (CDNB) and p-nitrophenyl acetate. Mitigates neuronal oxidative stress during normal postnatal development and in response to oxidative stresses probably through GSH antioxidant defense mechanism (By similarity). May play a role in EPS8 signaling. Binds glutat…	44777.5	7,52	CATALYTIC ACTIVITY
THE HUMAN PROTEIN ATLAS	Ubiquitin like modifier activating enzyme 5	E1-like enzyme which specifically catalyzes the first step in ufmylation 1, 2, 3, 4, 5, 6, 7, 8, 9, 10, 11. Activates UFM1 by first adenylating its C-terminal glycine residue with ATP, and thereafter linking this residue to the side chain of a cysteine residue in E1, yielding a UFM1-E1 thioester and free AMP 12, 13, 14, 15. Activates UFM1 via a trans-binding mechanism, in which UFM1 interacts wit…	44863.1	4.79	CATALYTIC ACTIVITY
THE HUMAN PROTEIN ATLAS	Ubiquitin like modifier activating enzyme 5	E1-like enzyme which specifically catalyzes the first step in ufmylation 1, 2, 3, 4, 5, 6, 7, 8, 9, 10, 11. Activates UFM1 by first adenylating its C-terminal glycine residue with ATP, and thereafter linking this residue to the side chain of a cysteine residue in E1, yielding a UFM1-E1 thioester and free AMP 12, 13, 14, 15. Activates UFM1 via a trans-binding mechanism, in which UFM1 interacts wit…	44863.1	4.79	CATALYTIC ACTIVITY
UNIPROT	Ubiquitin like modifier activating enzyme 5	E1-like enzyme which specifically catalyzes the first step in ufmylation 1, 2, 3, 4, 5, 6, 7, 8, 9, 10, 11. Activates UFM1 by first adenylating its C-terminal glycine residue with ATP, and thereafter linking this residue to the side chain of a cysteine residue in E1, yielding a UFM1-E1 thioester and free AMP 12, 13, 14, 15. Activates UFM1 via a trans-binding mechanism, in which UFM1 interacts wit…	44863.1	4.79	CATALYTIC ACTIVITY
UNIPROT	Ubiquitin like modifier activating enzyme 5	E1-like enzyme which specifically catalyzes the first step in ufmylation 1, 2, 3, 4, 5, 6, 7, 8, 9, 10, 11. Activates UFM1 by first adenylating its C-terminal glycine residue with ATP, and thereafter linking this residue to the side chain of a cysteine residue in E1, yielding a UFM1-E1 thioester and free AMP 12, 13, 14, 15. Activates UFM1 via a trans-binding mechanism, in which UFM1 interacts wit…	44863.1	4.79	CATALYTIC ACTIVITY
THE HUMAN PROTEIN ATLAS	Pleckstrin homology like domain family A member 1	Seems to be involved in regulation of apoptosis. May be involved in detachment-mediated programmed cell death. May mediate apoptosis during neuronal development. May be involved in regulation of anti-apoptotic effects of IGF1. May be involved in translational regulation.	44888.1	9.94	CELL DEATH
UNIPROT	Haptoglobin	Haptoglobin captures, and combines with free plasma hemoglobin to allow hepatic recycling of heme iron and to prevent kidney damage. Haptoglobin also acts as an antioxidant, has antibacterial activity, and plays a role in modulating many aspects of the acute phase response. Hemoglobin/haptoglobin complexes are rapidly cleared by the macrophage CD163 scavenger receptor expressed on the surface of …	45205.3	6.13	ANTIMICROBIAL
THE HUMAN PROTEIN ATLAS	Mitochondrial ribosomal protein S31	Ribonucleoprotein, Ribosomal protein	45318.5	9.32	CELL FUNCTION REGULATOR
UNIPROT	Golgi phosphoprotein 2	Golgi phosphoprotein 2 (GOLPH2), a widely expressed Golgi type II transmembrane protein, has been implicated in several important physiological and pathological processes, including virus infections, cancer cell proliferation, and metastasis.	45333.2	4.91	BIOMARKER
THE HUMAN PROTEIN ATLAS	Phosphoinositide-3-kinase adaptor protein 1	Signaling adapter that contributes to B-cell development by linking B-cell receptor (BCR) signaling to the phosphoinositide 3-kinase (PI3K)-Akt signaling pathway.	45512.3	9.16	SIGNAL
THE HUMAN PROTEIN ATLAS	Myocyte enhancer factor 2C	Transcriptional activator that specifically binds to the MEF2 element present in the regulatory regions of many muscle-specific genes. It controls cardiac morphogenesis and myogenesis, and is also involved in vascular development. It enhances SOX18-mediated transcriptional activation. It plays an essential role in hippocampus-dependent learning and memory by suppressing the number of excitatory s…	45820.3	8,95	ACTIVATOR
THE HUMAN PROTEIN ATLAS	Arginyl-tRNA synthetase 2, mitochondrial	Catalyzes the attachment of arginine to tRNA(Arg) in a two-step reaction: arginine is first activated by ATP to form Arg-AMP and then transferred to the acceptor end of tRNA(Arg).	45996.9	7.14	CATALYTIC ACTIVITY
THE HUMAN PROTEIN ATLAS	AKNA domain containing 1	Part of the dynactin complex that activates the molecular motor dynein for ultra-processive transport along microtubules. Plays a key role in dynein-mediated retrograde transport of vesicles and organelles along microtubules by recruiting and tethering dynein to microtubules.	46064.3	5.85	TRANSCRIPTION
THE HUMAN PROTEIN ATLAS	Ankyrin repeat domain 61	UNSPECIFIC	46122.5	9.1	UNSPECIFIC
THE HUMAN PROTEIN ATLAS	Tachykinin receptor 1	This is a receptor for the tachykinin neuropeptide substance P. It is probably associated with G proteins that activate a phosphatidylinositol-calcium second messenger system. The rank order of affinity of this receptor to tachykinins is: substance P > substance K > neuromedin-K	46250.9	6.78	RECEPTOR
UNIPROT	ICE-LAP6	envolved in the activation cascade of caspases responsible for apoptosis execution. Binding of caspase-9 to Apaf-1 leads to activation of the protease which then cleaves and activates caspase-3. Promotes DNA damage-induced apoptosis in a ABL1/c-Abl-dependent manner. Proteolytically cleaves poly(ADP-ribose) polymerase	46280.8	5.73	CELL DEATH
THE HUMAN PROTEIN ATLAS	Branched chain keto acid dehydrogenase kinase	Catalyzes the phosphorylation and inactivation of the branched-chain alpha-ketoacid dehydrogenase complex, the key regulatory enzyme of the valine, leucine and isoleucine catabolic pathways. Key enzyme that regulate the activity state of the BCKD complex.	46360.5	8.97	METABOLIC
THE HUMAN PROTEIN ATLAS	G protein-coupled receptor kinase 2	Specifically phosphorylates the agonist-occupied form of the beta-adrenergic and closely related receptors, probably inducing a desensitization of them	46537	7.92	ENZYME
THE HUMAN PROTEIN ATLAS	Calcium release activated channel regulator 2B	Plays a role in store-operated Ca(2+) entry (SOCE).	46546.8	5.68	ADHESION
THE HUMAN PROTEIN ATLAS	Protein tyrosine phosphatase receptor type R	Sequesters mitogen-activated protein kinases (MAPKs) such as MAPK1, MAPK3 and MAPK14 in the cytoplasm in an inactive form. The MAPKs bind to a dephosphorylated kinase interacting motif, phosphorylation of which by the protein kinase A complex releases the MAPKs for activation and translocation into the nucleus	46553.7	8.6	ACTIVATOR
THE HUMAN PROTEIN ATLAS	Proline rich protein BstNI subfamily 2	Sequesters mitogen-activated protein kinases (MAPKs) such as MAPK1, MAPK3 and MAPK14 in the cytoplasm in an inactive form. The MAPKs bind to a dephosphorylated kinase interacting motif, phosphorylation of which by the protein kinase A complex releases the MAPKs for activation and translocation into the nucleus	46553.7	8.60	SALIVARY PROPERTIES
THE HUMAN PROTEIN ATLAS	Ankyrin repeat and sterile alpha motif domain containing 4B	As part of the intermicrovillar adhesion complex/IMAC plays a role in epithelial brush border differentiation, controlling microvilli organization and length. Plays a role in assembly of the complex	46596.8	4.99	METABOLIC
THE HUMAN PROTEIN ATLAS	ST6 N-acetylgalactosaminide alpha-2,6-sialyltransferase 1	Protein sialyltransferase specifically expressed in goblet cells that plays a key role in intestinal host-commensal homeostasis 1. Conjugates sialic acid with an alpha-2-6 linkage to N-acetylgalactosamine (GalNAc) glycan chains linked to serine or threonine in glycoproteins 2, 3. Catalyzes the formation of the sialyl-Tn (S-Tn) antigen, an antigen found in intestinal goblet cells, as well as ulcer…	46604.6	9.13	CATALYTIC ACTIVITY
PMID: 33142561	Stratifin	Salivary protein that stabilizes saliva supersaturated with calcium salts by inhibiting the precipitation of calcium phosphate salts. It also modulates hydroxyapatite crystal formation on the tooth surface.	46649.4	4.84	BIOMARKER
THE HUMAN PROTEIN ATLAS	Paired box 6	Transcription factor with important functions in the development of the eye, nose, central nervous system and pancreas. Required for the differentiation of pancreatic islet alpha cells	46683.4	9.45	CELL CYCLE
PMID: 32950519 DOI: 10.1016/j.cca.2020.09.009	α fetoprotein	Binds copper, nickel, and fatty acids as well as, and bilirubin less well than, serum albumin. Only a small percentage (less than 2%) of the human AFP shows estrogen-binding properties.	46736.6	5.37	BIOMARKER
THE HUMAN PROTEIN ATLAS	Sorting nexin 5	Involved in several stages of intracellular trafficking. Interacts with membranes containing phosphatidylinositol 3-phosphate (PtdIns(3P)) or phosphatidylinositol 3,4-bisphosphate (PtdIns(3,4)P2) 1. Acts in part as component of the retromer membrane-deforming SNX-BAR subcomplex. The SNX-BAR retromer mediates retrograde transport of cargo proteins from endosomes to the trans-Golgi network (TGN) an…	46816.5	6.31	CELLULAR ORGANIZATION
THE HUMAN PROTEIN ATLAS	ACD shelterin complex subunit and telomerase recruitment factor	Promotes binding of POT1 to single-stranded telomeric DNA. Modulates the inhibitory effects of POT1 on telomere elongation. The ACD-POT1 heterodimer enhances telomere elongation by recruiting telomerase to telomeres and increasing its processivity. May play a role in organogenesis.	47092.1	5.03	CELL FUNCTION REGULATOR
THE HUMAN PROTEIN ATLAS	A-kinase anchoring protein 5	Multivalent scaffold protein that anchors the cAMP-dependent protein kinase/PKA to cytoskeletal and/or organelle-associated proteins, targeting the signal carried by cAMP to specific intracellular effectors	47100.3	4.87	CARRIER
PMID: 27814656 DOI: 10.2741/4526	Enolase	It is a metabolic enzyme involved in the synthesis of pyruvate. It also acts as a plasminogen receptor and mediates plasmin activation and degradation of the extracellular matrix.	47169	7.01	BIOMARKER
THE HUMAN PROTEIN ATLAS	Solute carrier family 17 member 2	Acts as a membrane potential-dependent organic anion transporter, the transport requires a low concentration of chloride ions (By similarity). Mediates chloride-dependent transport of urate (By similarity). Can actively transport inorganic phosphate into cells via Na(+) cotransport (By similarity).	47266.8	8.85	CARRIER
THE HUMAN PROTEIN ATLAS	Neuromedin U receptor 1	Receptor for the neuromedin-U and neuromedin-S neuropeptides.	47322.7	8.99	RECEPTOR
THE HUMAN PROTEIN ATLAS	Creatine kinase, mitochondrial 2	Reversibly catalyzes the transfer of phosphate between ATP and various phosphogens (e.g. creatine phosphate). Creatine kinase isoenzymes play a central role in energy transduction in tissues with large, fluctuating energy demands, such as skeletal muscle, heart, brain and spermatozoa.	47504.5	8.46	ENZYME
THE HUMAN PROTEIN ATLAS	E2F transcription factor 2	Transcription activator that binds DNA cooperatively with DP proteins through the E2 recognition site, 5'-TTTC[CG]CGC-3' found in the promoter region of a number of genes whose products are involved in cell cycle regulation or in DNA replication.	47514.9	4.79	ACTIVATOR
THE HUMAN PROTEIN ATLAS	Transforming growth factor beta 2	[Transforming growth factor beta-2 proprotein]: Precursor of the Latency-associated peptide (LAP) and Transforming growth factor beta-2 (TGF-beta-2) chains, which constitute the regulatory and active subunit of TGF-beta-2, respectively.	47633.7	8,82	SIGNAL
THE HUMAN PROTEIN ATLAS	Acyl-CoA dehydrogenase long chain	Long-chain specific acyl-CoA dehydrogenase is one of the acyl-CoA dehydrogenases that catalyze the first step of mitochondrial fatty acid beta-oxidation, an aerobic process breaking down fatty acids into acetyl-CoA and allowing the production of energy from fats	47655.6	7.28	METABOLIC
UNIPROT	Zinc finger protein 232	Predicted to enable DNA-binding transcription factor activity, RNA polymerase II-specific and RNA polymerase II cis-regulatory region sequence-specific DNA binding activity. Predicted to be involved in regulation of transcription by RNA polymerase II. Located in cytosol and nucleoplasm. [provided by Alliance of Genome Resources, Apr 2022]	47687.7	6.28	TRANSCRIPTION
THE HUMAN PROTEIN ATLAS	Zinc finger protein 232	Predicted to enable DNA-binding transcription factor activity, RNA polymerase II-specific and RNA polymerase II cis-regulatory region sequence-specific DNA binding activity. Predicted to be involved in regulation of transcription by RNA polymerase II. Located in cytosol and nucleoplasm. [provided by Alliance of Genome Resources, Apr 2022]	47687.7	6.28	TRANSCRIPTION
THE HUMAN PROTEIN ATLAS	Ring finger protein 26	E3 ubiquitin-protein ligase that plays a key role in endosome organization by retaining vesicles in the perinuclear cloud 1. Acts as a platform for perinuclear positioning of the endosomal system by mediating ubiquitination of SQSTM1 through interaction with the ubiquitin conjugating enzyme UBE2J1 2, 3. Ubiquitinated SQSTM1 attracts specific vesicle-associated adapters, forming a molecular bridge…	47737.4	8.86	CELLULAR ORGANIZATION
THE HUMAN PROTEIN ATLAS	Mitogen-activated protein kinase 8	Serine/threonine-protein kinase involved in various processes such as cell proliferation, differentiation, migration, transformation and programmed cell death. Extracellular stimuli such as pro-inflammatory cytokines or physical stress stimulate the stress-activated protein kinase/c-Jun N-terminal kinase (SAP/JNK) signaling pathway 1. In this cascade, two dual specificity kinases MAP2K4/MKK4 and …	47941.1	6,29	CELL FUNCTION REGULATOR
THE HUMAN PROTEIN ATLAS	5-hydroxytryptamine receptor 7	This is one of the several different receptors for 5-hydroxytryptamine (serotonin), a biogenic hormone that functions as a neurotransmitter, a hormone, and a mitogen. The activity of this receptor is mediated by G proteins that stimulate adenylate cyclase	47984.4	8.89	HORMONAL
THE HUMAN PROTEIN ATLAS	Family with sequence similarity 114 member A2	UNSPECIFIC	47986.9	4.73	UNSPECIFIC
THE HUMAN PROTEIN ATLAS	BEN domain containing 5	Acts as a transcriptional repressor	48181.8	5.88	INHIBITOR
UNIPROT	Transcobalamin I	Downstream effector molecule involved in the transmission of signals from tyrosine kinase receptors and small GTPases to the actin cytoskeleton. Promotes formation of actin filaments. Part of the WAVE complex that regulates lamellipodia formation. The WAVE complex regulates actin filament reorganization via its interaction with the Arp2/3 complex.	48206.7	4.96	ADHESION
PMID: 20176268 DOI: 10.1016/j.jaci.2009.09.046 (UNIPROT)	Transferrin precursor	Binds vitamin B12 with femtomolar affinity and protects it from the acidic environment of the stomach.	48206.7	4.96	CARRIER
THE HUMAN PROTEIN ATLAS	Tripartite motif containing 31	E3 ubiquitin-protein ligase that acts as a regulator of antiviral immune response and inflammation by mediating ubiquitination of substrates 1, 2, 3. Acts as a regulator of innate immune defense against viruses by mediating 'Lys-63'-linked ubiquitination of MAVS, promoting MAVS polymerization and formation of three-stranded helical filaments on mitochondria 4. Acts as a negative regulator of the …	48242.9	8,09	IMMUNOLOGICAL
UNIPROT	Tripartite motif containing 31	E3 ubiquitin-protein ligase that acts as a regulator of antiviral immune response and inflammation by mediating ubiquitination of substrates 1, 2, 3. Acts as a regulator of innate immune defense against viruses by mediating 'Lys-63'-linked ubiquitination of MAVS, promoting MAVS polymerization and formation of three-stranded helical filaments on mitochondria 4. Acts as a negative regulator of the …	48243.9	7.55	IMMUNOLOGICAL
THE HUMAN PROTEIN ATLAS	Tripartite motif containing 31	E3 ubiquitin-protein ligase that acts as a regulator of antiviral immune response and inflammation by mediating ubiquitination of substrates 1, 2, 3. Acts as a regulator of innate immune defense against viruses by mediating 'Lys-63'-linked ubiquitination of MAVS, promoting MAVS polymerization and formation of three-stranded helical filaments on mitochondria 4. Acts as a negative regulator of the …	48243.9	7.55	IMMUNOLOGICAL
THE HUMAN PROTEIN ATLAS	Abhydrolase domain containing 2, acylglycerol lipase	Acts as a progesterone receptor: progesterone-binding activates the acylglycerol lipase activity, mediating degradation of 1-arachidonoylglycerol (1AG) and 2-arachidonoylglycerol (2AG) to glycerol and arachidonic acid (AA)	48314.9	6.24	METABOLIC
THE HUMAN PROTEIN ATLAS	Ras association domain family member 8	This gene encodes a member of the Ras-assocation domain family (RASSF) of tumor suppressor proteins. This gene is essential for maintaining adherens junction function in epithelial cells and has a role in epithelial cell migration. It is a lung tumor suppressor gene candidate. A chromosomal translocation t(12;22)(p11.2;q13.3) leading to the fusion of this gene and the FBLN1 gene is found in a com…	48327	6.21	CELL FUNCTION REGULATOR
THE HUMAN PROTEIN ATLAS	Major facilitator superfamily domain containing 10	Confers cellular resistance to apoptosis induced by the non-steroidal anti-inflammatory drugs indomethacin and diclofenac. May act as an efflux pump.	48339.2	9.68	CELL FUNCTION REGULATOR
THE HUMAN PROTEIN ATLAS	Leucine rich repeat containing 42	UNSPECIFIC	48468.3	7,20	UNSPECIFIC
THE HUMAN PROTEIN ATLAS	Adenylate kinase 9	Involved in maintaining the homeostasis of cellular nucleotides by catalyzing the interconversion of nucleoside phosphates. Has both nucleoside monophosphate and diphosphate kinase activities.	48500.6	4.9	METABOLIC
THE HUMAN PROTEIN ATLAS	Ectodysplasin A receptor	Receptor for EDA isoform A1, but not for EDA isoform A2. Mediates the activation of NF-kappa-B and JNK. May promote caspase-independent cell death.	48582.2	5.08	RECEPTOR
THE HUMAN PROTEIN ATLAS	Insulin like growth factor 2 mRNA binding protein 1	RNA-binding factor that recruits target transcripts to cytoplasmic protein-RNA complexes (mRNPs). This transcript 'caging' into mRNPs allows mRNA transport and transient storage.	48597.6	9.08	TRANSCRIPTION
THE HUMAN PROTEIN ATLAS	WD repeat domain, phosphoinositide interacting 1	Component of the autophagy machinery that controls the major intracellular degradation process by which cytoplasmic materials are packaged into autophagosomes and delivered to lysosomes for degradation	48685.2	6.14	CELL DEATH
THE HUMAN PROTEIN ATLAS	ATPase H+ transporting V1 subunit C2	Subunit of the V1 complex of vacuolar(H+)-ATPase (V-ATPase), a multisubunit enzyme composed of a peripheral complex (V1) that hydrolyzes ATP and a membrane integral complex (V0) that translocates protons (By similarity). V-ATPase is responsible for acidifying and maintaining the pH of intracellular compartments and in some cell types, is targeted to the plasma membrane, where it is responsible fo…	48758.8	5.82	ENZYME
THE HUMAN PROTEIN ATLAS	Dolichyl-diphosphooligosaccharide--protein glycosyltransferase non-catalytic subunit	Subunit of the oligosaccharyl transferase (OST) complex that catalyzes the initial transfer of a defined glycan (Glc(3)Man(9)GlcNAc(2) in eukaryotes) from the lipid carrier dolichol-pyrophosphate to an asparagine residue within an Asn-X-Ser/Thr consensus motif in nascent polypeptide chains, the first step in protein N-glycosylation	48799.5	5.42	ENZYME
THE HUMAN PROTEIN ATLAS	Nuclear factor I C	Recognizes and binds the palindromic sequence 5'- TTGGCNNNNNGCCAA-3' present in viral and cellular promoters and in the origin of replication of adenovirus type 2. These proteins are individually capable of activating transcription and replication.	48894.4	8.54	TRANSCRIPTION
THE HUMAN PROTEIN ATLAS	Sp9 transcription factor	Transcription factor which plays a key role in limb development. Positively regulates FGF8 expression in the apical ectodermal ridge (AER) and contributes to limb outgrowth in embryos (By similarity)	48915	9.05	TRANSCRIPTION
THE HUMAN PROTEIN ATLAS	Exosome component 9	Non-catalytic component of the RNA exosome complex which has 3'->5' exoribonuclease activity and participates in a multitude of cellular RNA processing and degradation events.	48919	5.19	ENZYME
THE HUMAN PROTEIN ATLAS	ArfGAP with FG repeats 2	This gene is a member of the HIV-1 Rev binding protein (HRB) family and encodes a protein with one Arf-GAP zinc finger domain, several phe-gly (FG) motifs, and four asn-pro-phe (NPF) motifs. This protein interacts with Eps15 homology (EH) domains and plays a role in the Rev export pathway, which mediates the nucleocytoplasmic transfer of proteins and RNAs.	48933	9.28	ADHESION
THE HUMAN PROTEIN ATLAS	Histone H4 transcription factor	Transcriptional repressor that binds to the consensus sequence 5'-CGGACGTT-3' and to the RB1 promoter. Transcriptional activator that promotes histone H4 gene transcription at the G1/S phase transition in conjunction with NPAT.	48992.6	6.85	TRANSCRIPTION
THE HUMAN PROTEIN ATLAS	Iroquois homeobox 2	DNA-binding	49129.1	5.14	CELLULAR ORGANIZATION
UNIPROT	Salivary acidic proline_x0002_rich phosphoprotein 1/2 precursor	PRP's act as highly potent inhibitors of crystal growth of calcium phosphates. They provide a protective and reparative environment for dental enamel which is important for the integrity of the teeth.	49130.4	8.82	IMMUNOLOGICAL
PMID: 34484204 DOI: 10.3389/fimmu.2021.707217	MSTP063	CCNA2/CDK2 regulatory protein that transiently maintains CCNA2 in the cytoplasm.	49172.5	8.82	CELL FUNCTION REGULATOR
https://www.ncbi.nlm.nih.gov/gene/3866	Keratin, type I cytoskeletal 15	he protein encoded by this gene is a member of the keratin gene family. The keratins are intermediate filament proteins responsible for the structural integrity of epithelial cells and are subdivided into cytokeratins and hair keratins. Most of the type I cytokeratins consist of acidic proteins which are arranged in pairs of heterotypic keratin chains and are clustered in a region on chromosome 1…	49211.7	4.71	CELLULAR ORGANIZATION
THE HUMAN PROTEIN ATLAS	Peptidyl arginine deiminase 2	Catalyzes the removal of arginine residues from proteins.	49223.2	4,93	CATALYTIC ACTIVITY
THE HUMAN PROTEIN ATLAS	NAD kinase	Kinase, Transferase	49242.3	6.14	ENZYME
THE HUMAN PROTEIN ATLAS	Voltage-gated potassium channel subunit Kv6.4	Involved in vitamin D transport and storage, scavenging of extracellular G-actin, enhancement of the chemotactic activity of C5 alpha for neutrophils in inflammation and macrophage activation.	49291.4	8.72	CARRIER
THE HUMAN PROTEIN ATLAS	Salivary proline-rich glycoprotein precursor PRB2	pRb2/p130 is a key tumor suppressor, whose oncosuppressive activity has mainly been attributed to its ability to negatively regulate cell cycle by interacting with the E2F4 and E2F5 transcription factors. Indeed, pRb2/p130 has been found altered in various cancer types in which it functions as a valuable prognostic marker.	49293.4	8.64	ANTIMICROBIAL
THE HUMAN PROTEIN ATLAS	CD55 molecule (Cromer blood group)	Inhibits complement activation by destabilizing and preventing the formation of C3 and C5 convertases, which prevents complement damage	49338.4	9.13	IMMUNOLOGICAL
THE HUMAN PROTEIN ATLAS	G protein-coupled receptor 180	This gene encodes a protein that is a member of the G protein-coupled receptor superfamily.	49395.4	7.01	CELL FUNCTION REGULATOR
THE HUMAN PROTEIN ATLAS	WD repeat domain, phosphoinositide interacting 2	Component of the autophagy machinery that controls the major intracellular degradation process by which cytoplasmic materials are packaged into autophagosomes and delivered to lysosomes for degradation	49408.4	6.04	CELL DEATH
UNIPROT	Transcription factor hXBP-1	Functions as a transcription factor during endoplasmic reticulum (ER) stress by regulating the unfolded protein response (UPR). Required for cardiac myogenesis and hepatogenesis during embryonic development, and the development of secretory tissues such as exocrine pancreas and salivary gland	49439.7	6.35	TRANSCRIPTION
THE HUMAN PROTEIN ATLAS	Zinc finger protein 641	Transcriptional activator. Activate the transcriptional activities of SRE and AP-1.	49470.1	5.83	ACTIVATOR
THE HUMAN PROTEIN ATLAS	Terminal nucleotidyltransferase 5A	Cytoplasmic non-canonical poly(A) RNA polymerase that catalyzes the transfer of one adenosine molecule from an ATP to an mRNA poly(A) tail bearing a 3'-OH terminal group and participates in the cytoplasmic polyadenylation 1. Polyadenylates mRNA encoding extracellular matrix constituents and other genes crucial for bone mineralization and during osteoblast mineralization, mainly focuses on ER-targ…	49666.3	5.03	CATALYTIC ACTIVITY
THE HUMAN PROTEIN ATLAS	Tubulin beta class I	Tubulin is the major constituent of microtubules, a cylinder consisting of laterally associated linear protofilaments composed of alpha- and beta-tubulin heterodimers. Microtubules grow by the addition of GTP-tubulin dimers to the microtubule end, where a stabilizing cap forms. Below the cap, tubulin dimers are in GDP-bound state, owing to GTPase activity of alpha-tubulin	49670.8	4.78	STRUCTURAL
UNIPROT	Tubulin beta class I	Tubulin is the major constituent of microtubules, a cylinder consisting of laterally associated linear protofilaments composed of alpha- and beta-tubulin heterodimers. Microtubules grow by the addition of GTP-tubulin dimers to the microtubule end, where a stabilizing cap forms. Below the cap, tubulin dimers are in GDP-bound state, owing to GTPase activity of alpha-tubulin	49670.8	4.78	STRUCTURAL
THE HUMAN PROTEIN ATLAS	CTP synthase 1	This enzyme is involved in the de novo synthesis of CTP, a precursor of DNA, RNA and phospholipids. Catalyzes the ATP-dependent amination of UTP to CTP with either L-glutamine or ammonia as a source of nitrogen. This enzyme and its product, CTP, play a crucial role in the proliferation of activated lymphocytes and therefore in immunity.	49694.9	7.23	SIGNAL
THE HUMAN PROTEIN ATLAS	Carbonic anhydrase 9	Catalyzes the interconversion between carbon dioxide and water and the dissociated ions of carbonic acid (i.e. bicarbonate and hydrogen ions).	49697.9	4.64	CATALYTIC ACTIVITY
THE HUMAN PROTEIN ATLAS	Gamma-aminobutyric acid type A receptor subunit alpha6	GABA, the major inhibitory neurotransmitter in the vertebrate brain, mediates neuronal inhibition by binding to the GABA/benzodiazepine receptor and opening an integral chloride channel.	49706.7	8.59	INHIBITOR
THE HUMAN PROTEIN ATLAS	SRY-box transcription factor 10	Transcription factor that plays a central role in developing and mature glia. Specifically activates expression of myelin genes, during oligodendrocyte (OL) maturation	49911.1	6.19	ACTIVATOR
THE HUMAN PROTEIN ATLAS	Eukaryotic translation elongation factor 1 gamma	Probably plays a role in anchoring the complex to other cellular components.	50146.9	6.25	CELL FUNCTION REGULATOR
PMID: 12942743	Neutrophil gelatinase, chain A	Gelatinase was found in the granules that are lighter as compared to neutralohydrolasosomes and represent a subpopulation of peroxidase-negative granules. In addition to gelatinase, these granules contain beta-2 microglobulin, cytochrome b558, as well as receptor and adhesion proteins. Upon stimulation by inflammatory mediators, the gelatinase granules are secreted faster than the neutralohydrola…	50223.7	5	BIOMARKER
THE HUMAN PROTEIN ATLAS	Nucleobindin 2	Calcium-binding protein which may have a role in calcium homeostasis (By similarity). Acts as a non-receptor guanine nucleotide exchange factor which binds to and activates guanine nucleotide-binding protein (G-protein) alpha subunit GNAI3 (By similarity)	50223.7	5	CELL FUNCTION REGULATOR
THE HUMAN PROTEIN ATLAS	Notch 1 protein	Functions as a receptor for membrane-bound ligands Jagged-1 (JAG1), Jagged-2 (JAG2) and Delta-1 (DLL1) to regulate cell-fate determination.	50223.7	5	RECEPTOR
THE HUMAN PROTEIN ATLAS	RasGEF domain family member 1B	Guanine nucleotide exchange factor (GEF) with specificity for RAP2A, it doesn't seems to activate other Ras family proteins (in vitro).	50320.6	8.26	ACTIVATOR
THE HUMAN PROTEIN ATLAS	Sp8 transcription factor	Transcription factor which plays a key role in limb development. Positively regulates FGF8 expression in the apical ectodermal ridge (AER) and contributes to limb outgrowth in embryos (By similarity)	50442.5	9.02	TRANSCRIPTION
PMID: 20176268 DOI: 10.1016/j.jaci.2009.09.046 (UNIPROT)	Ig M heavy chain (fragment)	Critical for B-cell development.	50466.4	8.18	IMMUNOLOGICAL
THE HUMAN PROTEIN ATLAS	C-type lectin domain family 18 member B	Binds polysaccharides in a Ca(2+)-independent manner	50478.4	8.39	ADHESION
THE HUMAN PROTEIN ATLAS	C-type lectin domain family 18 member A	Binds polysaccharides in a Ca(2+)-independent manner with a preferentially binding to fucoidan, beta-glucans and galactans	50478.5	8.37	ADHESION
THE HUMAN PROTEIN ATLAS	Gamma-glutamyltransferase 6	Hydrolyzes and transfers gamma-glutamyl moieties from glutathione and other gamma-glutamyl compounds to acceptors.	50537.4	5,66	ENZYME
UNIPROT	Metalloproteinase inhibitor 1	functions as a growth factor that regulates cell differentiation, migration and cell death and activates cellular signaling cascades via CD63 and ITGB1. Plays a role in integrin signaling	50560.1	8.38	BIOMARKER
PMID: 30173249	MMP-13	The collagenases, MMP-1 and MMP-13, have predominant roles in RA and OA because they are rate limiting in the process of collagen degradation.MMP-13 is a product of the chondrocytes that reside in the cartilage. In addition to collagen, MMP-13 also degrades the proteoglycan molecule, aggrecan, giving it a dual role in matrix destruction.	50853	5.77	BIOMARKER
THE HUMAN PROTEIN ATLAS	RAN binding protein 3 like	Nuclear export factor for BMP-specific SMAD1/5/8 that plays a critical role in terminating BMP signaling and regulating mesenchymal stem cell differentiation by blocking osteoblast differentiation to promote myogenic differention. Directly recognizes dephosphorylated SMAD1/5/8 and mediates their nuclear export in a Ran-dependent manner.	50853.6	9.23	SIGNAL
THE HUMAN PROTEIN ATLAS	Glucosaminyl (N-acetyl) transferase 3, mucin type	Glycosyltransferase that can synthesize all known mucin beta 6 N-acetylglucosaminides. Mediates core 2 and core 4 O-glycan branching, 2 important steps in mucin-type biosynthesis. Has also I-branching enzyme activity by converting linear into branched poly-N-acetyllactosaminoglycans, leading to introduce the blood group I antigen during embryonic development.	50863.6	8,53	ENZYME
THE HUMAN PROTEIN ATLAS	NADPH oxidase activator 1	Functions as an activator of NOX1, a superoxide-producing NADPH oxidase. Functions in the production of reactive oxygen species (ROS) which participate in a variety of biological processes including host defense, hormone biosynthesis, oxygen sensing and signal transduction. May also activate CYBB/gp91phox and NOX3	50933.5	6.06	ACTIVATOR
THE HUMAN PROTEIN ATLAS	RUS family member 1	This gene encodes a putative transmembrane protein containing a conserved DUF647 domain that may be involved in protein-protein interaction. The encoded protein is related to a plant protein that participates in ultraviolet B light-sensing during root morphogenesis.	51017.8	6.47	STRUCTURAL
UNIPROT	Coronin-1A	May be a crucial component of the cytoskeleton of highly motile cells, functioning both in the invagination of large pieces of plasma membrane, as well as in forming protrusions of the plasma membrane involved in cell locomotion. In mycobacteria-infected cells, its retention on the phagosomal membrane prevents fusion between phagosomes and lysosomes.	51026.2	6.25	ADHESION
UNIPROT	Somatostatin and angiotensin-like peptide receptor	Important for the resorption of phosphate by the kidney. May be involved in actively transporting phosphate into cells via Na+ cotransport in the renal brush border membrane. Plays a role in urate transport in the kidney	51123.8	9.07	RECEPTOR
UNIPROT	Sodium/phosphate cotransporter 1	salivary protein CSP-1 binds to S. mutans cells and may influence the initial colonization of this pathogenic bacterium onto the tooth surface.	51131.6	8.89	CARRIER
THE HUMAN PROTEIN ATLAS	CEA cell adhesion molecule 1	[Isoform 1]: Cell adhesion protein that mediates homophilic cell adhesion in a calcium-independent manner (By similarity). Plays a role as coinhibitory receptor in immune response, insulin action and functions also as an activator during angiogenesis 1, 2, 3. Its coinhibitory receptor function is phosphorylation- and PTPN6 -dependent, which in turn, suppress signal transduction of associated rece…	51146.6	6.18	ADHESION
THE HUMAN PROTEIN ATLAS	Tubulin gamma 1	Tubulin is the major constituent of microtubules. The gamma chain is found at microtubule organizing centers (MTOC) such as the spindle poles or the centrosome. Pericentriolar matrix component that regulates alpha/beta chain minus-end nucleation, centrosome duplication and spindle formation.	51169.9	5.75	CELLULAR ORGANIZATION
UNIPROT	Tubulin gamma 1	Tubulin is the major constituent of microtubules. The gamma chain is found at microtubule organizing centers (MTOC) such as the spindle poles or the centrosome. Pericentriolar matrix component that regulates alpha/beta chain minus-end nucleation, centrosome duplication and spindle formation.	51169.9	5.75	CELLULAR ORGANIZATION
UNIPROT	Keratin, type I cytoskeletal 16	Epidermis-specific type I keratin that plays a key role in skin. Acts as a regulator of innate immunity in response to skin barrier breach: required for some inflammatory checkpoint for the skin barrier maintenance.	51267.8	4.98	CELLULAR ORGANIZATION
THE HUMAN PROTEIN ATLAS	GA binding protein transcription factor subunit alpha	Transcription factor capable of interacting with purine rich repeats (GA repeats). Necessary for the expression of the Adenovirus E4 gene.	51295.2	4.87	TRANSCRIPTION
THE HUMAN PROTEIN ATLAS	G protein-coupled receptor 39	This receptor mediates its action by association with G proteins that activate a phosphatidylinositol-calcium second messenger system. Its effect is mediated mainly through G(q)-alpha and G(12)/G(13) proteins. Involved in regulation of body weight, gastrointestinal mobility, hormone secretion and cell death	51328.8	9.43	RECEPTOR
UNIPROT	Protein-glutamine γ-glutamyltransferase	Catalyzes the calcium-dependent formation of isopeptide cross-links between glutamine and lysine residues in various proteins, as well as the conjugation of polyamines to proteins. Involved in the formation of the cornified envelope (CE), a specialized component consisting of covalent cross-links of proteins beneath the plasma membrane of terminally differentiated keratinocytes. Catalyzes small p…	51359.3	5	ENZYME
THE HUMAN PROTEIN ATLAS	Cholinergic receptor muscarinic 1	The muscarinic acetylcholine receptor mediates various cellular responses, including inhibition of adenylate cyclase, breakdown of phosphoinositides and modulation of potassium channels through the action of G proteins. Primary transducing effect is Pi turnover.	51420.9	9.45	RECEPTOR
THE HUMAN PROTEIN ATLAS	Vasoactive intestinal peptide receptor 1	This is a receptor for VIP. The activity of this receptor is mediated by G proteins which activate adenylyl cyclase. The affinity is VIP = PACAP-27 > PACAP-38.	51522.2	8.41	RECEPTOR
UNIPROT	Vasoactive intestinal peptide receptor 1	This is a receptor for VIP. The activity of this receptor is mediated by G proteins which activate adenylyl cyclase. The affinity is VIP = PACAP-27 > PACAP-38.	51522.2	8.41	RECEPTOR
https://www.ncbi.nlm.nih.gov/gene/3861	Keratin, type I cytoskeletal 14	This gene encodes a member of the keratin family, the most diverse group of intermediate filaments. This gene product, a type I keratin, is usually found as a heterotetramer with two keratin 5 molecules, a type II keratin. Together they form the cytoskeleton of epithelial cells. Mutations in the genes for these keratins are associated with epidermolysis bullosa simplex.	51561.5	5.09	CELLULAR ORGANIZATION
THE HUMAN PROTEIN ATLAS	Keratin 14	The nonhelical tail domain is involved in promoting KRT5-KRT14 filaments to self-organize into large bundles and enhances the mechanical properties involved in resilience of keratin intermediate filaments in vitro.	51561.5	5,09	CELLULAR ORGANIZATION
UNIPROT	Hemopexin precursor	Binds heme and transports it to the liver for breakdown and iron recovery, after which the free hemopexin returns to the circulation.	51676.4	6.55	CARRIER
THE HUMAN PROTEIN ATLAS	Interferon induced protein with tetratricopeptide repeats 1	Interferon-induced antiviral RNA-binding protein that specifically binds single-stranded RNA bearing a 5'-triphosphate group (PPP-RNA), thereby acting as a sensor of viral single-stranded RNAs and inhibiting expression of viral messenger RNAs. Single-stranded PPP-RNAs, which lack 2'-O-methylation of the 5' cap and bear a 5'- triphosphate group instead, are specific from viruses, providing a molec…	51713.5	8,55	ADHESION
THE HUMAN PROTEIN ATLAS	Cerebellar degeneration related protein 2	Se predice que estará ubicado en el citoplasma.	51855.2	5.01	STRUCTURAL
PMID: 31263835	Actin α1	Mutations in the skeletal muscle α-actin gene (ACTA1) cause a range of congenital myopathies characterised by muscle weakness and specific skeletal muscle structural lesions. Actin accumulations, nemaline and intranuclear bodies, fibre-type disproportion, cores, caps, dystrophic features and zebra bodies have all been seen in biopsies from patients with ACTA1 disease, with patients frequently pre…	51857.7	8.02	MOTOR
THE HUMAN PROTEIN ATLAS	Phenylalanine hydroxylase	Catalyzes the hydroxylation of L-phenylalanine to L-tyrosine	51862.1	6.15	ENZYME
THE HUMAN PROTEIN ATLAS	Cytochrome P450 family 4 subfamily F member 11	A cytochrome P450 monooxygenase involved in the metabolism of various endogenous substrates, including fatty acids and their oxygenated derivatives (oxylipins)	52247.4	7.25	METABOLIC
THE HUMAN PROTEIN ATLAS	Fatty acid desaturase 2	Involved in the biosynthesis of highly unsaturated fatty acids (HUFA) from the essential polyunsaturated fatty acids (PUFA) linoleic acid (LA) (18:2n-6) and alpha-linolenic acid (ALA) (18:3n-3) precursors, acting as a fatty acyl-coenzyme A (CoA) desaturase that introduces a cis double bond at carbon 6 of the fatty acyl chain.	52259.4	8.86	ENZYME
UNIPROT	Glutathione synthase	Catalyzes the production of glutathione from gamma-glutamylcysteine and glycine in an ATP-dependent manner	52384.8	5.67	METABOLIC
UNIPROT	Von Ebner minor salivary gland protein	Could play a role in taste reception. Could be necessary for the concentration and delivery of sapid molecules in the gustatory system. Can bind various ligands, with chemical structures ranging from lipids and retinoids to the macrocyclic antibiotic rifampicin and even to microbial siderophores. Exhibits an extremely wide ligand pocket.	52441.6	6.72	IMMUNOLOGICAL
THE HUMAN PROTEIN ATLAS	BPI fold containing family B member 1	May play a role in innate immunity in mouth, nose and lungs. Binds bacterial lipopolysaccharide (LPS) and modulates the cellular responses to LPS.	52441.6	6.72	IMMUNOLOGICAL
THE HUMAN PROTEIN ATLAS	Small nuclear RNA activating complex polypeptide 4	Part of the SNAPc complex required for the transcription of both RNA polymerase II and III small-nuclear RNA genes. Binds to the proximal sequence element (PSE), a non-TATA-box basal promoter element common to these 2 types of genes. Recruits TBP and BRF2 to the U6 snRNA TATA box.	52459.8	5.15	TRANSCRIPTION
THE HUMAN PROTEIN ATLAS	WD repeat domain 59	As a component of the GATOR subcomplex GATOR2, functions within the amino acid-sensing branch of the TORC1 signaling pathway. Indirectly activates mTORC1 and the TORC1 signaling pathway through the inhibition of the GATOR1 subcomplex	52462.5	6.52	SIGNAL
https://www.ncbi.nlm.nih.gov/gene/1191	Clusterin	The protein encoded by this gene is a secreted chaperone that can under some stress conditions also be found in the cell cytosol. It has been suggested to be involved in several basic biological events such as cell death, tumor progression, and neurodegenerative disorders	52494.6	5.88	IMMUNOLOGICAL
THE HUMAN PROTEIN ATLAS	GATA zinc finger domain containing 2A	Transcriptional repressor. Enhances MBD2-mediated repression. Efficient repression requires the presence of GATAD2B.	52513.4	10.46	TRANSCRIPTION
THE HUMAN PROTEIN ATLAS	Sorting nexin 8	May be involved in several stages of intracellular trafficking. May play a role in intracellular protein transport from early endosomes to the trans-Golgi network	52569.4	6.96	CARRIER
THE HUMAN PROTEIN ATLAS	RUNX family transcription factor 2	Transcription factor involved in osteoblastic differentiation and skeletal morphogenesis. Essential for the maturation of osteoblasts and both intramembranous and endochondral ossification.	52655.6	9.51	ADHESION
THE HUMAN PROTEIN ATLAS	Dynein axonemal heavy chain 12	Force generating protein of respiratory cilia. Produces force towards the minus ends of microtubules. Dynein has ATPase activity; the force-producing power stroke is thought to occur on release of ADP. Involved in sperm motility; implicated in sperm flagellar assembly (By similarity).	52686.1	5.1	MOTOR
PMID: 29969719 DOI: 10.1016/j.freeradbiomed.2018.06.037	Vitamin D-binding protein	Plays an important role in angiogenesis. Its recruitment by phosphorylated EPHA2 is critical for EFNA1-induced RAC1 GTPase activation and vascular endothelial cell migration and assembly	52917.5	5.32	ADHESION
UNIPROT	Dynein heavy chain	Cytoplasmic dynein 1 acts as a motor for the intracellular retrograde motility of vesicles and organelles along microtubules. Dynein has ATPase activity; the force-producing power stroke is thought to occur on release of ADP. Plays a role in mitotic spindle assembly and metaphase plate congression	52955.6	6.08	MOTOR
THE HUMAN PROTEIN ATLAS	F-box and WD repeat domain containing 9	Substrate-recognition component of the SCF (SKP1-CUL1-F-box protein)-type E3 ubiquitin ligase complex.	52974.9	6.1	CELL FUNCTION REGULATOR
THE HUMAN PROTEIN ATLAS	Plasminogen activator, tissue type	Converts the abundant, but inactive, zymogen plasminogen to plasmin by hydrolyzing a single Arg-Val bond in plasminogen. By controlling plasmin-mediated proteolysis, it plays an important role in tissue remodeling and degradation, in cell migration and many other physiopathological events. During oocyte activation, plays a role in cortical granule reaction in the zona reaction, which contributes …	52992.2	8.12	CELL FUNCTION REGULATOR
THE HUMAN PROTEIN ATLAS	ETS variant transcription factor 6	Transcriptional repressor; binds to the DNA sequence 5'- CCGGAAGT-3'. Plays a role in hematopoiesis and malignant transformation.	52999.9	6.95	CELL FUNCTION REGULATOR
THE HUMAN PROTEIN ATLAS	IQ motif containing C	UNSPECIFIC	53032.2	8.22	UNSPECIFIC
THE HUMAN PROTEIN ATLAS	ETS variant transcription factor 1	Transcriptional activator that binds to DNA sequences containing the consensus pentanucleotide 5'-CGGA[AT]-3'. Required for olfactory dopaminergic neuron differentiation; may directly activate expression of tyrosine hydroxylase (TH) (By similarity).	53052.7	6.08	ACTIVATOR
THE HUMAN PROTEIN ATLAS	Prostaglandin E receptor 4	Receptor for prostaglandin E2 (PGE2). The activity of this receptor is mediated by G(s) proteins that stimulate adenylate cyclase. Has a relaxing effect on smooth muscle. May play an important role in regulating renal hemodynamics, intestinal epithelial transport, adrenal aldosterone secretion, and uterine function.	53119.5	9.08	RECEPTOR
THE HUMAN PROTEIN ATLAS	DENN domain containing 2D	Guanine nucleotide exchange factor (GEF) which may activate RAB9A and RAB9B. Promotes the exchange of GDP to GTP, converting inactive GDP-bound Rab proteins into their active GTP-bound form.	53148.4	7.93	CELL FUNCTION REGULATOR
PMID: 32657300 DOI: 10.1039/d0sm01055c	β-galactoside α-2, 3-sialyltransferase	Transfers the sialyl group (N-acetyl-alpha-neuraminyl or NeuAc) from CMP-NeuAc to the non-reducing terminal galactose (Gal) of glycosphingolipids forming gangliosides (important molecules involved in the regulation of multiple cellular processes, including cell proliferation and differentiation, apoptosis, embryogenesis, development, and oncogenesis)	53150.7	5.03	IMMUNOLOGICAL
THE HUMAN PROTEIN ATLAS	Rh family C glycoprotein	Ammonium transporter involved in the maintenance of acid-base homeostasis. Transports ammonium and its related derivative methylammonium across the plasma membrane of epithelial cells likely contributing to renal transepithelial ammonia transport and ammonia metabolism. Postulated to primarily mediate an electroneutral bidirectional transport of NH3 ammonia species according to a mechanism that i…	53179	5.93	CARRIER
THE HUMAN PROTEIN ATLAS	Tyrosyl-tRNA synthetase 2	Catalyzes the attachment of tyrosine to tRNA(Tyr) in a two-step reaction: tyrosine is first activated by ATP to form Tyr-AMP and then transferred to the acceptor end of tRNA(Tyr).	53199	9.07	ENZYME
THE HUMAN PROTEIN ATLAS	Microtubule associated serine/threonine kinase like	Serine/threonine kinase that plays a key role in M phase by acting as a regulator of mitosis entry and maintenance. Acts by promoting the inactivation of protein phosphatase 2A (PP2A) during M phase: does not directly inhibit PP2A but acts by mediating phosphorylation and subsequent activation of ARPP19 and ENSA at 'Ser-62' and 'Ser-67', respectively. ARPP19 and ENSA are phosphatase inhibitors th…	53424.8	5,37	CELL FUNCTION REGULATOR
PMID: 16359177 DOI: 10.1021/tx050181o	Cytokeratin 9	P450 2C18 catalyzed the primary hydroxylation of PHT with a kcat (2.46 +/- 0.09 min-1) more than an order of magnitude higher than that of P450 2C9 (0.051 +/- 0.004 min-1) and P450 2C19 (0.054 +/- 0.002 min-1) and Km (45 +/- 5 microM) slightly greater than those of P450 2C9 (12 +/- 4 microM) and P450 2C19 (29 +/- 4 microM). P450 2C18 also efficiently catalyzed the secondary hydroxylation of PHT a…	53464.7	5.21	CELLULAR ORGANIZATION
THE HUMAN PROTEIN ATLAS	Gamma-aminobutyric acid type A receptor subunit gamma1	GABA, the major inhibitory neurotransmitter in the vertebrate brain, mediates neuronal inhibition by binding to the GABA/benzodiazepine receptor and opening an integral chloride channel.	53595	8.39	INHIBITOR
THE HUMAN PROTEIN ATLAS	Elongation factor for RNA polymerase II	Elongation factor component of the super elongation complex (SEC), a complex required to increase the catalytic rate of RNA polymerase II transcription by suppressing transient pausing by the polymerase at multiple sites along the DNA.	53600.4	9.66	TRANSCRIPTION
THE HUMAN PROTEIN ATLAS	Zinc finger protein 500	May be involved in transcriptional regulation.	53674.4	6.84	TRANSCRIPTION
THE HUMAN PROTEIN ATLAS	RIO kinase 1	Involved in the final steps of cytoplasmic maturation of the 40S ribosomal subunit. Involved in processing of 18S-E pre-rRNA to the mature 18S rRNA. Required for the recycling of NOB1 and PNO1 from the late 40S precursor 1. The association with the very late 40S subunit intermediate may involve a translation-like checkpoint point cycle preceeding the binding to the 60S ribosomal subunit (By simil…	53787.7	9.01	TRANSCRIPTION
PMID: 9846794 DOI: 10.1111/j.1600-051x.1998.tb02383.x	S100 calcium binding protein	Crevicular fluid pyridinoline cross-linked carboxyterminal telopeptide of type I collagen (ICTP) is predictive for future alveolar bone loss in experimental periodontitis in dogs. The present study sought to relate ICTP to a panel of subgingival species in subjects exhibiting various clinical presentations such as health, gingivitis and periodontitis.	53819.8	5.32	CELL CYCLE
THE HUMAN PROTEIN ATLAS	Glypican 1	Cell surface proteoglycan that bears heparan sulfate. Binds, via the heparan sulfate side chains, alpha-4 (V) collagen and participates in Schwann cell myelination (By similarity).	53934.4	6.73	ENZYME
THE HUMAN PROTEIN ATLAS	DIX domain containing 1	Positive effector of the Wnt signaling pathway; activates WNT3A signaling via DVL2. Regulates JNK activation by AXIN1 and DVL2.	53942.4	5.36	ACTIVATOR
THE HUMAN PROTEIN ATLAS	Solute carrier family 17 member 7	Multifunctional transporter that transports L-glutamate as well as multiple ions such as chloride, proton, potassium, sodium and phosphate 1. At the synaptic vesicle membrane, mainly functions as an uniporter which transports preferentially L-glutamate but also phosphate from the cytoplasm into synaptic vesicles at presynaptic nerve terminals of excitatory neural cells (By similarity). The L-glut…	53946.5	6.67	CARRIER
THE HUMAN PROTEIN ATLAS	Raftlin family member 2	Upon bacterial lipopolysaccharide stimulation, mediates clathrin-dependent internalization of TLR4 in dendritic cells, resulting in activation of TICAM1-mediated signaling and subsequent IFNB1 production. May regulate B-cell antigen receptor-mediated signaling.	54073.3	5.37	ACTIVATOR
THE HUMAN PROTEIN ATLAS	Galactose-3-O-sulfotransferase 4	Catalyzes the transfer of sulfate to beta-1,3-linked galactose residues in O-linked glycoproteins. Good substrates include asialofetuin, Gal-beta-1,3-GalNAc and Gal-beta-1,3 (GlcNAc-beta-1,6)GalNAc.	54166.2	10.2	ENZYME
THE HUMAN PROTEIN ATLAS	Clusterin like 1	It is anticipated that it will allow binding activity to misfolded proteins. It is anticipated that it will be located in the extracellular region. It is predicted to be active in the extracellular space and nucleus.	54214.8	5.09	CELL FUNCTION REGULATOR
THE HUMAN PROTEIN ATLAS	Potassium voltage-gated channel modifier subfamily S member 2	Potassium channel subunit that does not form functional channels by itself.	54237.3	5.58	CELL FUNCTION REGULATOR
THE HUMAN PROTEIN ATLAS	Wiskott–Aldrich syndrome protein family member 2	As component of the IFT complex A (IFT-A), a complex required for retrograde ciliary transport and entry into cilia of G protein-coupled receptors (GPCRs), it is involved in cilia function and/or assembly. Essential for functional IFT-A assembly and ciliary entry of GPCRs	54284	5.37	RECEPTOR
PMID: 15837518 DOI: 10.1002/ijc.20267	Ribosomal protein L36a	Involved in the type II fatty acid elongation cycle. Catalyzes the elongation of a wide range of acyl-ACP by the addition of two carbons from malonyl-ACP to an acyl acceptor. Can efficiently catalyze the conversion of palmitoleoyl-ACP (cis-hexadec-9-enoyl-ACP) to cis-vaccenoyl-ACP (cis-octadec-11-enoyl-ACP), an essential step in the thermal regulation of fatty acid composition.	54284.8	8.98	ENZYME
THE HUMAN PROTEIN ATLAS	5-hydroxytryptamine receptor 2B	G-protein coupled receptor for 5-hydroxytryptamine (serotonin)	54298	9.22	CELL FUNCTION REGULATOR
THE HUMAN PROTEIN ATLAS	One cut homeobox 2	Transcriptional activator. Activates the transcription of a number of liver genes such as HNF3B.	54303.2	9.65	ACTIVATOR
THE HUMAN PROTEIN ATLAS	Vitronectin	Vitronectin is a cell adhesion and spreading factor found in serum and tissues. Vitronectin interact with glycosaminoglycans and proteoglycans. Is recognized by certain members of the integrin family and serves as a cell-to-substrate adhesion molecule. Inhibitor of the membrane-damaging effect of the terminal cytolytic complement pathway.	54335.7	5.55	ADHESION
UNIPROT	Vitronectin	Vitronectin is a cell adhesion and spreading factor found in serum and tissues. Vitronectin interact with glycosaminoglycans and proteoglycans. Is recognized by certain members of the integrin family and serves as a cell-to-substrate adhesion molecule. Inhibitor of the membrane-damaging effect of the terminal cytolytic complement pathway.	54335.7	5.55	ADHESION
THE HUMAN PROTEIN ATLAS	BTB domain containing 7	Acts as a mediator of epithelial dynamics and organ branching by promoting cleft progression. Induced following accumulation of fibronectin in forming clefts, leading to local expression of the cell-scattering SNAIL2 and suppression of E-cadherin levels, thereby altering cell morphology and reducing cell-cell adhesion.	54359.8	6.4	CELL CYCLE
THE HUMAN PROTEIN ATLAS	Glutamic--pyruvic transaminase	Catalyzes the reversible transamination between alanine and 2-oxoglutarate to form pyruvate and glutamate. Participates in cellular nitrogen metabolism and also in liver gluconeogenesis starting with precursors transported from skeletal muscles (By similarity).	54613.9	6.73	ENZYME
THE HUMAN PROTEIN ATLAS	Nitric oxide synthase trafficking	Multivalent adapter protein which may decrease NOS3 activity by inducing its translocation away from the plasma membrane	54619	8.68	INHIBITOR
THE HUMAN PROTEIN ATLAS	Transcription factor CP2 like 1	Transcription factor that facilitates establishment and maintenance of pluripotency in embryonic stem cells (ESCs). With KLF2, acts as the major effector of self-renewal that mediates induction of pluripotency downstream of LIF/STAT3 and Wnt/beta-catenin signaling	54626.7	6.53	ADHESION
UNIPROT	Brain-muscle-ARNT-like transcription factor 2a	Transcriptional activator which forms a core component of the circadian clock. The circadian clock, an internal time-keeping system, regulates various physiological processes through the generation of approximately 24 hour circadian rhythms in gene expression, which are translated into rhythms in metabolism and behavior.	54826.5	5.9	ADHESION
THE HUMAN PROTEIN ATLAS	Zinc finger protein 256	Transcriptional repressor that plays a role in cell proliferation. Requires TRIM28 for its activity.	54855.8	9.26	INHIBITOR
UNIPROT	Zinc finger protein 256	Transcriptional repressor that plays a role in cell proliferation. Requires TRIM28 for its activity.	54855.8	9.26	INHIBITOR
UNIPROT	Vascular endothelial zinc finger 1	Possible transcription factor. Specifically binds to the CT/GC-rich region of the interleukin-3 promoter and mediates tax transactivation of IL-3.	54924.1	9.66	TRANSCRIPTION
THE HUMAN PROTEIN ATLAS	Vascular endothelial zinc finger 1	Possible transcription factor. Specifically binds to the CT/GC-rich region of the interleukin-3 promoter and mediates tax transactivation of IL-3.	54924.1	9.66	TRANSCRIPTION
THE HUMAN PROTEIN ATLAS	Cysteine sulfinic acid decarboxylase	Catalyzes the decarboxylation of L-aspartate, 3-sulfino-L-alanine (cysteine sulfinic acid), and L-cysteate to beta-alanine, hypotaurine and taurine, respectively. The preferred substrate is 3-sulfino-L-alanine. Does not exhibit any decarboxylation activity toward glutamate.	55023.2	6.06	ENZYME
THE HUMAN PROTEIN ATLAS	Eukaryotic translation initiation factor 3 subunit L	Component of the eukaryotic translation initiation factor 3 (eIF-3) complex, which is required for several steps in the initiation of protein synthesis	55161.7	9.04	CELL FUNCTION REGULATOR
THE HUMAN PROTEIN ATLAS	Diacylglycerol O-acyltransferase 1	Catalyzes the terminal and only committed step in triacylglycerol synthesis by using diacylglycerol and fatty acyl CoA as substrates	55278.3	9.41	ENZYME
THE HUMAN PROTEIN ATLAS	Kinesin light chain 3	Kinesin is a microtubule-associated force-producing protein that may play a role in organelle transport.	55364.2	6.06	MOTOR
UNIPROT	WASP-family protein	alpha4-integrin is the molecule expressed on hematopoietic stem cells.	55411.1	6.21	CELL FUNCTION REGULATOR
THE HUMAN PROTEIN ATLAS	APC down-regulated 1 like	Possible inhibitor of the WNT signaling pathway	55634.8	9.15	INHIBITOR
STRING	Cysteine-rich secretory protein-3	May activate the lysosomal degradation of sphingolipids	55710.6	6.83	SECRETOR
UNIPROT	Zinc finger and SCAN domain containing 5C	May be involved in transcriptional regulation.	55727.1	8.43	CELL FUNCTION REGULATOR
THE HUMAN PROTEIN ATLAS	Zinc finger and SCAN domain containing 5C	May be involved in transcriptional regulation.	55727.1	8.43	TRANSCRIPTION
THE HUMAN PROTEIN ATLAS	Solute carrier family 2 member 7	Probable sugar transporter 1. Even if its physiological substrate is subject to discussion, it is able to transport glucose and fructose 2, 3, 4. Does not transport galactose, 2-deoxy-d-glucose and xylose	55727.5	8.68	CARRIER
UNIPROT	Zinc finger and SCAN domain containing 5A	Enables sequence-specific double-stranded DNA binding activity. Predicted to be involved in regulation of transcription by RNA polymerase II. Predicted to be located in nucleus. [provided by Alliance of Genome Resources, Apr 2022]	55865.3	8.70	CELL FUNCTION REGULATOR
THE HUMAN PROTEIN ATLAS	Zinc finger and SCAN domain containing 5A	Enables sequence-specific double-stranded DNA binding activity. Predicted to be involved in regulation of transcription by RNA polymerase II. Predicted to be located in nucleus. [provided by Alliance of Genome Resources, Apr 2022]	55865.3	8.70	TRANSCRIPTION
UNIPROT	Hyaluronan binding protein (fragment)	Hyaluronan specifically binds to aggrecan globular domain 1, which is often referred to as just hyaluronan binding protein (HABP), however, the hyaluronan carbohydrate structure recognized by HABP had not been studied in detail.	55878.9	4.38	ADHESION
THE HUMAN PROTEIN ATLAS	PLAG1 zinc finger	Transcription factor whose activation results in up-regulation of target genes, such as IGFII, leading to uncontrolled cell proliferation: when overexpressed in cultured cells, higher proliferation rate and transformation are observed.	55913.4	8.84	ACTIVATOR
THE HUMAN PROTEIN ATLAS	Fibrinogen beta chain	Cleaved by the protease thrombin to yield monomers which, together with fibrinogen alpha (FGA) and fibrinogen gamma (FGG), polymerize to form an insoluble fibrin matrix.	55928.2	8.54	COAGULATION
THE HUMAN PROTEIN ATLAS	Ganglioside induced differentiation associated protein 2	It is predicted to act upstream or within the retinoic acid response. Located in the lysosomal membrane. Involved in autosomal recessive spinocerebellar ataxia 27	56048.7	5.78	RECEPTOR
THE HUMAN PROTEIN ATLAS	SRY-box transcription factor 9	Transcription factor that plays a key role in chondrocytes differentiation and skeletal development	56137.1	6.31	ACTIVATOR
https://www.ncbi.nlm.nih.gov/gene/3851	Keratin, type II cytoskeletal 4	The protein encoded by this gene is a member of the keratin gene family. The type II cytokeratins consist of basic or neutral proteins which are arranged in pairs of heterotypic keratin chains coexpressed during differentiation of simple and stratified epithelial tissues. This type II cytokeratin is specifically expressed in differentiated layers of the mucosal and esophageal epithelia with famil…	56144	6.25	CELLULAR ORGANIZATION
PMID: 9790987 DOI: 10.1006/bbrc.1998.9545	Nucleobindin 1	Major calcium-binding protein of the Golgi. May have a role in calcium homeostasis; Belongs to the nucleobindin family	56144	6.25	METABOLIC
THE HUMAN PROTEIN ATLAS	Calcium/calmodulin dependent protein kinase II beta	is involved in dendritic spine and synapse formation, neuronal plasticity and regulation of sarcoplasmic reticulum Ca(2+) transport in skeletal muscle. In neurons, plays an essential structural role in the reorganization of the actin cytoskeleton during plasticity by binding and bundling actin filaments in a kinase-independent manner.	56379.3	7.04	CELL CYCLE
THE HUMAN PROTEIN ATLAS	Spastin	ATP-dependent microtubule severing protein that specifically recognizes and cuts microtubules that are polyglutamylated 1, 2, 3, 4, 5, 6, 7. Preferentially recognizes and acts on microtubules decorated with short polyglutamate tails: severing activity increases as the number of glutamates per tubulin rises from one to eight, but decreases beyond this glutamylation threshold 8. Severing activity i…	56398	9.76	STRUCTURAL
THE HUMAN PROTEIN ATLAS	Adenosylhomocysteinase like 1	Multifaceted cellular regulator which coordinates several essential cellular functions including regulation of epithelial HCO3(-) and fluid secretion, mRNA processing and DNA replication. Regulates ITPR1 sensitivity to inositol 1,4,5-trisphosphate, competing for the common binding site and acting as endogenous 'pseudoligand' whose inhibitory activity can be modulated by its phosphorylation status…	56468.6	8.14	CELL FUNCTION REGULATOR
PMID: 27048414 DOI: 10.1177/1753425916642614	DNMT3A protein	Surface-adsorbed salivary agglutinin (SAG) activates the lectin pathway (LP) of the complement system via mannose-binding lectin, while SAG in solution inhibits complement activation.	56567.1	4.82	BIOMARKER
THE HUMAN PROTEIN ATLAS	X-linked inhibitor of apoptosis	Multi-functional protein which regulates not only caspases and apoptosis, but also modulates inflammatory signaling and immunity, copper homeostasis, mitogenic kinase signaling, cell proliferation, as well as cell invasion and metastasis. Acts as a direct caspase inhibitor.	56684.9	6.22	INHIBITOR
THE HUMAN PROTEIN ATLAS	Atos homolog B	Transcription regulator that may syncronize transcriptional and translational programs.	56690	9.09	TRANSCRIPTION
THE HUMAN PROTEIN ATLAS	Family with sequence similarity 214 member B	UNSPECIFIC	56720	8.97	UNSPECIFIC
THE HUMAN PROTEIN ATLAS	ATPase H+ transporting V1 subunit B1	Non-catalytic subunit of the V1 complex of vacuolar(H+)- ATPase (V-ATPase), a multisubunit enzyme composed of a peripheral complex (V1) that hydrolyzes ATP and a membrane integral complex (V0) that translocates protons 1. V-ATPase is responsible for acidifying and maintaining the pH of intracellular compartments and in some cell types, is targeted to the plasma membrane, where it is responsible f…	56833	5.44	ENZYME
THE HUMAN PROTEIN ATLAS	Folliculin interacting protein 1	Binding partner of the GTPase-activating protein FLCN: involved in the cellular response to amino acid availability by regulating the mTORC1 signaling cascade controlling the MiT/TFE factors TFEB and TFE3	56847.8	9.09	CELL FUNCTION REGULATOR
THE HUMAN PROTEIN ATLAS	Angiopoietin 4	Binds to TEK/TIE2, modulating ANGPT1 signaling. Can induce tyrosine phosphorylation of TEK/TIE2. Promotes endothelial cell survival, migration and angiogenesis.	56848.5	9.1	STRUCTURAL
THE HUMAN PROTEIN ATLAS	GTP binding protein 6 (putative)	GTP-binding, Magnesium, Metal-binding, Nucleotide-binding. This gene encodes a GTP binding protein and is located in the pseudoautosomal region (PAR) at the end of the short arms of the X and Y chromosomes	56883.5	9.49	CELL FUNCTION REGULATOR
THE HUMAN PROTEIN ATLAS	Chloride voltage-gated channel Kb	Voltage-gated chloride channel. Chloride channels have several functions including the regulation of cell volume; membrane potential stabilization, signal transduction and transepithelial transport. May be important in urinary concentrating mechanisms.	56997.3	7.68	CELL FUNCTION REGULATOR
THE HUMAN PROTEIN ATLAS	CAMP responsive element binding protein 3 like 1	Transcription factor involved in unfolded protein response (UPR). Binds the DNA consensus sequence 5'-GTGXGCXGC-3'	57005.3	5.03	TRANSCRIPTION
THE HUMAN PROTEIN ATLAS	Vanin 1	Amidohydrolase that hydrolyzes specifically one of the carboamide linkages in D-pantetheine thus recycling pantothenic acid (vitamin B5) and releasing cysteamine	57011.7	5.32	ENZYME
UNIPROT	Vanin 1	Amidohydrolase that hydrolyzes specifically one of the carboamide linkages in D-pantetheine thus recycling pantothenic acid (vitamin B5) and releasing cysteamine	57011.7	5.32	ENZYME
UNIPROT	Fibrinogen	Fibrinogen is a large, complex, fibrous glycoprotein with three pairs of polypeptide chains linked together by 29 disulfide bonds. It is 45 nm in length, with globular domains at each end and in the middle connected by alpha-helical coiled-coil rods.	57019.1	6.33	COAGULATION
UNIPROT	Angiopoietin-related protein 2	Has a role in the formation and organization of the extracellular matrix. In the eye, it functions as a mediator of dexamethasone-induced matrix deposition in the trabecular meshwork, the tissue responsible for the outflow of the ocular aqueous humor and for the maintenance of intraocular pressure	57104.5	7.23	ADHESION
PMID: 17880251 DOI: 10.1021/la7013978	Serum/glucocorticoid regulated kinase-like, isoform 1	Serine/threonine-protein kinase which is involved in the regulation of a wide variety of ion channels, membrane transporters, cell growth, proliferation, survival and migration.	57108.2	6.45	CARRIER
THE HUMAN PROTEIN ATLAS	Thymocyte selection associated high mobility group box	Transcriptional regulator with a major role in neural stem cell commitment and corticogenesis as well as in lymphoid cell development and lymphoid tissue organogenesis (By similarity). Binds to GC-rich DNA sequences in the proximity of transcription start sites and may alter chromatin structure, modifying access of transcription factors to DNA. During cortical development, controls the neural ste…	57167.4	7,11	TRANSCRIPTION
THE HUMAN PROTEIN ATLAS	Sphingolipid transporter 1 (putative)	Plays a critical role in the phospholipid salvage pathway from lysosomes to the cytosol 1, 2. Mediates the rate-limiting, proton-dependent, lysosomal efflux of lysophospholipids, which can then be reacylated by acyltransferases in the endoplasmic reticulum to form phospholipids 3, 4. Selective for zwitterionic headgroups such as lysophosphatidylcholine (LPC) and lysophosphatidylethanolamine (LPE)…	57209.1	6.01	CARRIER
THE HUMAN PROTEIN ATLAS	CEA cell adhesion molecule 5	Cell surface glycoprotein that plays a role in cell adhesion, intracellular signaling and tumor progression	57231.1	5.49	ADHESION
THE HUMAN PROTEIN ATLAS	Sterol O-acyltransferase 1	Catalyzes the formation of fatty acid-cholesterol esters, which are less soluble in membranes than cholesterol. Plays a role in lipoprotein assembly and dietary cholesterol absorption	57238.1	9.19	ENZYME
THE HUMAN PROTEIN ATLAS	3-hydroxy-3-methylglutaryl-CoA synthase 1	Catalyzes the condensation of acetyl-CoA with acetoacetyl-CoA to form HMG-CoA, which is converted by HMG-CoA reductase (HMGCR) into mevalonate, a precursor for cholesterol synthesis.	57293.6	5.22	ENZYME
THE HUMAN PROTEIN ATLAS	Interleukin 9 receptor	Plays an important role in the immune response against parasites by acting as a receptor of IL9.	57333.1	5.33	IMMUNOLOGICAL
THE HUMAN PROTEIN ATLAS	Eukaryotic translation initiation factor 2 alpha kinase 2	IFN-induced dsRNA-dependent serine/threonine-protein kinase that phosphorylates the alpha subunit of eukaryotic translation initiation factor 2 (EIF2S1/eIF-2-alpha) and plays a key role in the innate immune response to viral infection	57390.8	8.19	IMMUNOLOGICAL
THE HUMAN PROTEIN ATLAS	Aldehyde dehydrogenase 3 family member A1	ALDHs play a major role in the detoxification of alcohol-derived acetaldehyde (Probable). They are involved in the metabolism of corticosteroids, biogenic amines, neurotransmitters, and lipid peroxidation (Probable). Oxidizes medium and long chain aldehydes into non-toxic fatty acids 1. Preferentially oxidizes aromatic aldehyde substrates 2. Comprises about 50 percent of corneal epithelial solubl…	57509.9	6.96	METABOLIC
THE HUMAN PROTEIN ATLAS	Tweety family member 3	Calcium-independent, swelling-dependent volume-regulated anion channel (VRAC-swell) which plays a pivotal role in the process of regulatory volume decrease (RVD) in the brain through the efflux of anions like chloride and organic osmolytes like glutamate (By similarity). Probable large-conductance Ca(2+)-activated chloride channel	57544.7	5.19	STRUCTURAL
UNIPROT	Tweety family member 3	Calcium-independent, swelling-dependent volume-regulated anion channel (VRAC-swell) which plays a pivotal role in the process of regulatory volume decrease (RVD) in the brain through the efflux of anions like chloride and organic osmolytes like glutamate (By similarity). Probable large-conductance Ca(2+)-activated chloride channel	57544.7	5.19	STRUCTURAL
THE HUMAN PROTEIN ATLAS	POZ/BTB and AT hook containing zinc finger 1	Transcriptional regulator that plays a role in many biological processes such as embryogenesis, senescence, T-cell development or neurogenesis 1, 2, 3. Interacts with the TP53 protein to control genes that are important in proliferation and in the DNA-damage response. Mechanistically, the interaction inhibits the DNA binding and transcriptional activity of TP53/p53 4. Part of the transcriptional …	57601.5	8.84	CELL FUNCTION REGULATOR
THE HUMAN PROTEIN ATLAS	Stromal interaction molecule 1	Acts as a Ca(2+) sensor that gates two major inward rectifying Ca(2+) channels at the plasma membrane: Ca(2+) release-activated Ca(2+) (CRAC) channels and arachidonate-regulated Ca(2+)- selective (ARC) channels 1, 2, 3, 4, 5, 6, 7, 8, 9, 10, 11, 12, 13, 14, 15, 16, 17, 18, 19, 20. Plays a role in mediating store-operated Ca(2+) entry (SOCE), a Ca(2+) influx following depletion of intracellular Ca…	57620.4	8.27	CELL FUNCTION REGULATOR
THE HUMAN PROTEIN ATLAS	Collagen type XIII alpha 1 chain	Involved in cell-matrix and cell-cell adhesion interactions that are required for normal development. May participate in the linkage between muscle fiber and basement membran	57651.3	9.52	ADHESION
THE HUMAN PROTEIN ATLAS	Protein phosphatase 3 catalytic subunit alpha	Calcium-dependent, calmodulin-stimulated protein phosphatase which plays an essential role in the transduction of intracellular Ca(2+)-mediated signals. Many of the substrates contain a PxIxIT motif and/or a LxVP motif . In response to increased Ca(2+) levels, dephosphorylates and activates phosphatase SSH1 which results in cofilin dephosphorylation . In response to increased Ca(2+) levels follow…	57658.8	5.91	SIGNAL
UNIPROT	α-amylase	Calcium-binding enzyme that initiates starch digestion in the oral cavity, Catalyzes the hydrolysis of internal (1->4)-alpha-D-glucosidic bonds, yielding a mixture of maltose, isomaltose, small amounts of glucose as well as small linear and branched oligosaccharides called dextrins	57767.8	6.47	METABOLIC
THE HUMAN PROTEIN ATLAS	Dynamin 3	Microtubule-associated force-producing protein involved in producing microtubule bundles and able to bind and hydrolyze GTP. Most probably involved in vesicular trafficking processes, in particular endocytosis	57789.4	8.74	MOTOR
THE HUMAN PROTEIN ATLAS	Kelch like family member 33	UNSPECIFIC	57809.6	6.98	UNSPECIFIC
THE HUMAN PROTEIN ATLAS	Karyopherin subunit alpha 3	Functions in nuclear protein import as an adapter protein for nuclear receptor KPNB1. Binds specifically and directly to substrates containing either a simple or bipartite NLS motif	57810.9	4.8	CELL FUNCTION REGULATOR
THE HUMAN PROTEIN ATLAS	Protein phosphatase 1 regulatory subunit 16A	Inhibits protein phosphatase 1 activity toward phosphorylase, myosin light chain and myosin substrates.	57811.4	5.68	INHIBITOR
THE HUMAN PROTEIN ATLAS	Serine/threonine kinase 33	Serine/threonine protein kinase which phosphorylates VIME. May play a specific role in the dynamic behavior of the intermediate filament cytoskeleton by phosphorylation of VIME (By similarity). Not essential for the survival of KRAS-dependent AML cell lines.	57830.8	6.6	STRUCTURAL
THE HUMAN PROTEIN ATLAS	Keratin 79	Keratins are intermediate filament proteins responsible for the structural integrity of epithelial cells and are subdivided into epithelial keratins and hair keratins. This gene encodes an epithelial keratin that is expressed in skeletal muscle, skin and scalp. The type II keratins are clustered in a region of chromosome 12q13.[provided by RefSeq, Jun 2009]	58093.8	7,10	STRUCTURAL
THE HUMAN PROTEIN ATLAS	Factor interacting with PAPOLA and CPSF1	Component of the cleavage and polyadenylation specificity factor (CPSF) complex that plays a key role in pre-mRNA 3'-end formation, recognizing the AAUAAA signal sequence and interacting with poly(A) polymerase and other factors to bring about cleavage and poly(A) addition.	58375.6	5.4	TRANSCRIPTION
THE HUMAN PROTEIN ATLAS	Matrix extracellular phosphoglycoprotein	Promotes renal phosphate excretion and inhibits intestinal phosphate absorption 1, 2. Promotes bone mineralization by osteoblasts and cartilage mineralization by chondrocytes 3, 4, 5. Regulates the mineralization of the extracellular matrix of the craniofacial complex, such as teeth, bone and cartilage (By similarity). Promotes dental pulp stem cell proliferation and differentiation 6.	58419	8,62	INHIBITOR
UNIPROT	PRR2 α	Ser/Thr-kinase component of cyclin D-CDK4 (DC) complexes that phosphorylate and inhibit members of the retinoblastoma (RB) protein family including RB1 and regulate the cell-cycle during G1/S transition.	58623.5	6.82	RECEPTOR
THE HUMAN PROTEIN ATLAS	Keratin 10	Plays a role in the establishment of the epidermal barrier on plantar skin (By similarity). Involved in the maintenance of cell layer development and keratin filament bundles in suprabasal cells of the epithelium (By similarity).	58680	5,13	CELLULAR ORGANIZATION
THE HUMAN PROTEIN ATLAS	Germ cell-less 1, spermatogenesis associated	Possible function in spermatogenesis. Enhances the degradation of MDM2 and increases the amount of p53 probably by modulating the nucleocytoplasmic transport (By similarity).	58685.1	7.42	CELL FUNCTION REGULATOR
THE HUMAN PROTEIN ATLAS	Cytochrome P450 family 4 subfamily X member 1	A cytochrome P450 monooxygenase that selectively catalyzes the epoxidation of the last double bond of the arachidonoyl moiety of anandamide, potentially modulating endocannabinoid signaling. Has no hydroxylase activity toward various fatty acids, steroids and prostaglandins. Mechanistically, uses molecular oxygen inserting one oxygen atom into a substrate, and reducing the second into a water mol…	58875.2	8.74	CATALYTIC ACTIVITY
THE HUMAN PROTEIN ATLAS	RIC8 guanine nucleotide exchange factor A	Guanine nucleotide exchange factor (GEF), which can activate some, but not all, G-alpha proteins. Able to activate GNAI1, GNAO1 and GNAQ, but not GNAS by exchanging bound GDP for free GTP. Involved in regulation of microtubule pulling forces during mitotic movement of chromosomes by stimulating G(i)-alpha protein, possibly leading to release G(i)-alpha-GTP and NuMA proteins from the NuMA-GPSM2-G(…	58943.1	6.17	ACTIVATOR
THE HUMAN PROTEIN ATLAS	TBC1 domain family member 22B	May act as a GTPase-activating protein for Rab family protein(s).	59081.1	6.94	ACTIVATOR
THE HUMAN PROTEIN ATLAS	Serine/threonine kinase 39	(UniProt)i Effector serine/threonine-protein kinase component of the WNK-SPAK/OSR1 kinase cascade, which is involved in various processes, such as ion transport, response to hypertonic stress and blood pressure 1, 2, 3, 4. Specifically recognizes and binds proteins with a RFXV motif 5, 6. Acts downstream of WNK kinases (WNK1, WNK2, WNK3 or WNK4): following activation by WNK kinases, catalyzes pho…	59474	5.92	CARRIER
THE HUMAN PROTEIN ATLAS	AarF domain containing kinase 1	Appears to be essential for maintaining mitochondrial cristae formation and mitochondrial function by acting via YME1L1 in a kinase-independent manner to regulate essential mitochondrial structural proteins OPA1 and IMMT	59719.2	8.84	ENZYME
THE HUMAN PROTEIN ATLAS	Motile sperm domain containing 2	Endoplasmic reticulum-anchored receptor which modulates interorganelle contacts by interacting with other organelle-bound proteins via their FFAT motif 1. Might have a more important role in endoplasmic reticulum and endosomes contacts 2. Promotes migration of primary monocytes and neutrophils, in response to various chemokines	59746.2	5.7	CELL FUNCTION REGULATOR
THE HUMAN PROTEIN ATLAS	Natriuretic peptide receptor 3	Receptor for the natriuretic peptide hormones, binding with similar affinities atrial natriuretic peptide NPPA/ANP, brain natriuretic peptide NPPB/BNP, and C-type natriuretic peptide NPPC/CNP. May function as a clearance receptor for NPPA, NPPB and NPPC, regulating their local concentrations and effects. May regulate diuresis, blood pressure and skeletal development. Does not have guanylate cycla…	59766.8	5.93	CELL FUNCTION REGULATOR
THE HUMAN PROTEIN ATLAS	Pyruvate dehyrogenase phosphatase catalytic subunit 2	Catalyzes the dephosphorylation and concomitant reactivation of the alpha subunit of the E1 component of the pyruvate dehydrogenase complex.	59978	5.69	ENZYME
PMID: 32252660 DOI: 10.1186/s12882-020-01782-0	Cytokeratin 4	This type II cytokeratin is specifically expressed in differentiated layers of the mucosal and esophageal epithelia with family member KRT13. Mutations in these genes have been associated with White Sponge Nevus, characterized by oral, esophageal, and anal leukoplakia.	60044.9	8.09	BIOMARKER
https://www.ncbi.nlm.nih.gov/gene/3855	Keratin, type II cytoskeletal 6A	The protein encoded by this gene is a member of the keratin gene family. The type II cytokeratins consist of basic or neutral proteins which are arranged in pairs of heterotypic keratin chains coexpressed during differentiation of simple and stratified epithelial tissues. As many as six of this type II cytokeratin (KRT6) have been identified; the multiplicity of the genes is attributed to success…	60044.9	8.09	CELLULAR ORGANIZATION
THE HUMAN PROTEIN ATLAS	Flavin containing dimethylaniline monoxygenase 3	Essential hepatic enzyme that catalyzes the oxygenation of a wide variety of nitrogen- and sulfur-containing compounds including drugs as well as dietary compounds. Plays an important role in the metabolism of trimethylamine (TMA), via the production of trimethylamine N-oxide (TMAO) metabolite 4. TMA is generated by the action of gut microbiota using dietary precursors such as choline, choline co…	60065.5	7,90	CATALYTIC ACTIVITY
https://www.ncbi.nlm.nih.gov/gene/3854	Keratin, type II cytoskeletal 6B	The protein encoded by this gene is a member of the keratin gene family. The type II cytokeratins consist of basic or neutral proteins which are arranged in pairs of heterotypic keratin chains coexpressed during differentiation of simple and stratified epithelial tissues. As many as six of this type II cytokeratin (KRT6) have been identified; the multiplicity of the genes is attributed to success…	60067	8.09	CELLULAR ORGANIZATION
THE HUMAN PROTEIN ATLAS	Cholinergic receptor muscarinic 5	The muscarinic acetylcholine receptor mediates various cellular responses, including inhibition of adenylate cyclase, breakdown of phosphoinositides and modulation of potassium channels through the action of G proteins.	60073.8	9.39	INHIBITOR
THE HUMAN PROTEIN ATLAS	Family with sequence similarity 124 member A	UNSPECIFIC	60104.1	6.12	UNSPECIFIC
THE HUMAN PROTEIN ATLAS	Potassium two pore domain channel subfamily K member 10	Outward rectifying potassium channel. Produces rapidly activating and non-inactivating outward rectifier K(+) currents. Activated by arachidonic acid and other naturally occurring unsaturated free fatty acids	60140.8	8.76	CELL FUNCTION REGULATOR
THE HUMAN PROTEIN ATLAS	Major facilitator superfamily domain containing 2A	Sodium-dependent lysophosphatidylcholine (LPC) symporter, which plays an essential role for blood-brain barrier formation and function 1, 2, 3. Specifically expressed in endothelium of the blood-brain barrier of micro-vessels and transports LPC into the brain (By similarity). Transport of LPC is essential because it constitutes the major mechanism by which docosahexaenoic acid (DHA), an omega-3 f…	60170.3	6.51	CELLULAR ORGANIZATION
THE HUMAN PROTEIN ATLAS	Germ cell-less 2, spermatogenesis associated	Possible function in spermatogenesis. Probable substrate-specific adapter of an E3 ubiquitin-protein ligase complex which mediates the ubiquitination and subsequent proteasomal degradation of target proteins	60200.9	8.04	CELLULAR ORGANIZATION
THE HUMAN PROTEIN ATLAS	Pseudouridine synthase 10	Protein with different functions depending on its subcellular location: involved in miRNA processing in the nucleus and acts as a tRNA pseudouridylate synthase in the cytoplasm. In the cytoplasm, acts as a pseudouridylate synthase by catalyzing synthesis of pseudouridine(54) and pseudouridine(55) from uracil-54 and uracil-55, respectively, in the psi GC loop of a subset of tRNAs. tRNA pseudouridy…	60244.2	6.09	TRANSCRIPTION
THE HUMAN PROTEIN ATLAS	14-3-3 protein	14-3-3σ is the protein that is most associated with tumor occurrence and development. In some malignancies, 14-3-3σ acts as a tumor suppressor via p53 and tumor suppressor genes. In most tumors, 14-3-3σ overexpression increases resistance to chemotherapy and radiotherapy and mediates the G2-M checkpoint after DNA damage.	60462.8	9.41	CARRIER
THE HUMAN PROTEIN ATLAS	Adenylate kinase 5	Nucleoside monophosphate (NMP) kinase that catalyzes the reversible transfer of the terminal phosphate group between nucleoside triphosphates and monophosphates. Active on AMP and dAMP with ATP as a donor.	60491.8	4.97	METABOLIC
THE HUMAN PROTEIN ATLAS	Rhotekin	Mediates Rho signaling to activate NF-kappa-B and may confer increased resistance to apoptosis to cells in gastric tumorigenesis. May play a novel role in the organization of septin structures.	60549.1	6.49	SIGNAL
THE HUMAN PROTEIN ATLAS	Zinc finger with KRAB and SCAN domains 3	Transcriptional factor that binds to the consensus sequence 5'-[GT][AG][AGT]GGGG-3' and acts as a repressor of autophagy. Specifically represses expression of genes involved in autophagy and lysosome biogenesis/function such as MAP1LC3B, ULK1 or WIPI2	60616	5.93	CELL DEATH
THE HUMAN PROTEIN ATLAS	Chromosome 5 open reading frame 22	UNSPECIFIC	60633.2	4.76	UNSPECIFIC
THE HUMAN PROTEIN ATLAS	Family with sequence similarity 114 member A1	May play a role in neuronal cell development.	60741.7	4.61	UNSPECIFIC
THE HUMAN PROTEIN ATLAS	Fms related receptor tyrosine kinase 1	Tyrosine-protein kinase that acts as a cell-surface receptor for VEGFA, VEGFB and PGF, and plays an essential role in the development of embryonic vasculature, the regulation of angiogenesis, cell survival, cell migration, macrophage function, chemotaxis, and cancer cell invasion.	60917.1	9.36	CELL FUNCTION REGULATOR
THE HUMAN PROTEIN ATLAS	Solute carrier family 9 member A1	Involved in pH regulation to eliminate acids generated by active metabolism or to counter adverse environmental conditions. Major proton extruding system driven by the inward sodium ion chemical gradient. Plays an important role in signal transduction	61013.2	7	CARRIER
PMID: 27911716 DOI: 10.1042/BST20160176	Chaperonin GroEL precursor	Collagen type III occurs in most soft connective tissues along with type I collagen. Involved in regulation of cortical development. Is the major ligand of GPR56 in the developing brain and binding to GPR56 inhibits neuronal migration and activates the RhoA pathway by coupling GPR56 to GNA13 and possibly GNA12.	61054.6	5.7	ADHESION
THE HUMAN PROTEIN ATLAS	Leucine rich repeat containing 63	Predicted to be integral component of membrane. [provided by Alliance of Genome Resources, Apr 2022]	61120.4	9,90	STRUCTURAL
THE HUMAN PROTEIN ATLAS	Suppressor of cytokine signaling 5	SOCS family proteins form part of a classical negative feedback system that regulates cytokine signal transduction. May be a substrate-recognition component of a SCF-like ECS (Elongin BC-CUL2/5-SOCS-box protein) E3 ubiquitin-protein ligase complex which mediates the ubiquitination and subsequent proteasomal degradation of target proteins. Inhibits for instance EGF signaling by mediating the degra…	61246.1	8.87	INHIBITOR
THE HUMAN PROTEIN ATLAS	Zinc finger with KRAB and SCAN domains 4	Enables identical protein binding activity. Predicted to be involved in regulation of transcription by RNA polymerase II. Located in nucleoplasm. [provided by Alliance of Genome Resources, Apr 2022]	61579.3	7.56	ACTIVATOR
UNIPROT	Zinc finger with KRAB and SCAN domains 4	Enables identical protein binding activity. Predicted to be involved in regulation of transcription by RNA polymerase II. Located in nucleoplasm. [provided by Alliance of Genome Resources, Apr 2022]	61579.3	7.56	CELL FUNCTION REGULATOR
THE HUMAN PROTEIN ATLAS	Tight junction associated protein 1	Plays a role in regulating the structure of the Golgi apparatus	61615	5,68	CELL FUNCTION REGULATOR
THE HUMAN PROTEIN ATLAS	Solute carrier family 5 member 10	High capacity transporter for mannose and fructose and, to a lesser extent, glucose, AMG, and galactose.	61616.2	7.55	CARRIER
THE HUMAN PROTEIN ATLAS	Brain enriched myelin associated protein 1	Required for myelination.	61708.9	4.99	CELL FUNCTION REGULATOR
THE HUMAN PROTEIN ATLAS	Synaptotagmin like 1	May play a role in vesicle trafficking (By similarity). Binds phosphatidylinositol 3,4,5-trisphosphate. Acts as a RAB27A effector protein and may play a role in cytotoxic granule exocytosis in lymphocytes (By similarity)	61857.1	5.32	CELLULAR ORGANIZATION
THE HUMAN PROTEIN ATLAS	Neurexophilin and PC-esterase domain family member 2	Predicted to be integral component of membrane. [provided by Alliance of Genome Resources, Apr 2022]	61973.5	8,63	STRUCTURAL
PMID: 15461460 DOI: 10.1021/bi048823e	Cytokeratin	Cytokeratins (CKs) constitute a diverse group of intermediate filament (IF) proteins, expressed as pairs in keratinized and nonkeratinizing epithelial cells. Much is known now about the expression, assembly, and function of CKs in keratinized epithelial cells, the main features being the tight coupling between CK pair switch and cell terminal differentiation (protection barrier) and the vital rol…	62044.3	5.14	CELLULAR ORGANIZATION
THE HUMAN PROTEIN ATLAS	Tripartite motif containing 26	E3 ubiquitin-protein ligase which regulates the IFN-beta production and antiviral response downstream of various DNA-encoded pattern-recognition receptors (PRRs).	62165.9	4.98	IMMUNOLOGICAL
THE HUMAN PROTEIN ATLAS	Collapsin response mediator protein 1	Necessary for signaling by class 3 semaphorins and subsequent remodeling of the cytoskeleton. Plays a role in axon guidance	62183.8	6.55	SIGNAL
THE HUMAN PROTEIN ATLAS	Forkhead box J2	Plays an important role in spermatogenesis, especially in spermatocyte meiosis (By similarity)	62394.8	6.2	ACTIVATOR
THE HUMAN PROTEIN ATLAS	HIVEP zinc finger 1	This protein specifically binds to the DNA sequence 5'- GGGACTTTCC-3' which is found in the enhancer elements of numerous viral promoters such as those of SV40, CMV, or HIV-1.	62397.7	5.82	ACTIVATOR
THE HUMAN PROTEIN ATLAS	Coenzyme A synthase	Bifunctional enzyme that catalyzes the fourth and fifth sequential steps of CoA biosynthetic pathway.	62404.9	6.51	ENZYME
THE HUMAN PROTEIN ATLAS	Transmembrane and coiled-coil domains 4	Predicted to be integral component of membrane	62412.1	5,67	STRUCTURAL
THE HUMAN PROTEIN ATLAS	Keratin 5	Required for the formation of keratin intermediate filaments in the basal epidermis and maintenance of the skin barrier in response to mechanical stress (By similarity). Regulates the recruitment of Langerhans cells to the epidermis, potentially by modulation of the abundance of macrophage chemotactic cytokines, macrophage inflammatory cytokines and CTNND1 localization in keratinocytes (By simila…	62435.4	7,58	CELL FUNCTION REGULATOR
THE HUMAN PROTEIN ATLAS	Oxysterol binding protein like 9	This gene encodes a member of the oxysterol-binding protein (OSBP) family, a group of intracellular lipid receptors. This family member functions as a cholesterol transfer protein that regulates Golgi structure and function.	62528.4	5.92	CARRIER
THE HUMAN PROTEIN ATLAS	Carboxilesterasa 1 Carboxylesterase 1	Involved in the detoxification of xenobiotics and in the activation of ester and amide prodrugs	62592.2	6.15	ENZYME
THE HUMAN PROTEIN ATLAS	Trafficking protein particle complex subunit 14	Specific subunit of the TRAPP (transport protein particle) II complex, a highly conserved vesicle tethering complex that functions in late Golgi trafficking as a membrane tether	62710.1	9,13	CARRIER
THE HUMAN PROTEIN ATLAS	Palmdelphin	Regulator of the shape of cells	62758.1	5.31	CELL FUNCTION REGULATOR
PMID: 31944402 DOI: 10.1096/fj.201902289R	Malic enzyme	Malic enzyme 1 (Me1), a member of the malic enzymes involving in glycolytic pathway and citric acid cycle, is essential for the energy metabolism and maintenance of intracellular redox balance state, but its physiological role and regulatory mechanism in the uterine decidualization are still unknown.	62885.8	6.53	METABOLIC
THE HUMAN PROTEIN ATLAS	WEE2 oocyte meiosis inhibiting kinase	Oocyte-specific protein tyrosine kinase that phosphorylates and inhibits CDK1/CDC2 and acts as a key regulator of meiosis during both prophase I and metaphase II.	62924.7	6.06	CELL CYCLE
THE HUMAN PROTEIN ATLAS	TBC1 domain family member 23	Putative Rab GTPase-activating protein which plays a role in vesicular trafficking 1. Involved in endosome-to-Golgi trafficking. Acts as a bridging protein by binding simultaneously to golgins, including GOLGA1 and GOLGA4, located at the trans-Golgi, and to the WASH complex, located on endosome-derived vesicles 2, 3. Together with WDR11 complex facilitates the golgin-mediated capture of vesicles …	63286.6	5.55	ACTIVATOR
THE HUMAN PROTEIN ATLAS	Calcineurin binding protein 1	May be required for replication-independent chromatin assembly. May serve as a negative regulator of T-cell receptor (TCR) signaling via inhibition of calcineurin. Inhibition of activated calcineurin is dependent on both PKC and calcium signals. Acts as a negative regulator of p53/TP53 by keeping p53 in an inactive state on chromatin at promoters of a subset of it's target genes.	63324.3	6.33	CELL FUNCTION REGULATOR
UNIPROT	Zinc finger protein 671	Predicted to enable DNA-binding transcription factor activity and RNA polymerase II cis-regulatory region sequence-specific DNA binding activity. Predicted to be involved in regulation of transcription by RNA polymerase II. Predicted to be located in nucleus. [provided by Alliance of Genome Resources, Apr 2022]	63363.1	9.08	TRANSCRIPTION
THE HUMAN PROTEIN ATLAS	Zinc finger protein 671	Predicted to enable DNA-binding transcription factor activity and RNA polymerase II cis-regulatory region sequence-specific DNA binding activity. Predicted to be involved in regulation of transcription by RNA polymerase II. Predicted to be located in nucleus. [provided by Alliance of Genome Resources, Apr 2022]	63363.1	9.08	TRANSCRIPTION
THE HUMAN PROTEIN ATLAS	TATA-box binding protein associated factor 4b	Cell type-specific subunit of the general transcription factor TFIID that may function as a gene-selective coactivator in certain cells. TFIID is a multimeric protein complex that plays a central role in mediating promoter responses to various activators and repressors.	63363.6	9.92	ADHESION
UNIPROT	TESK2 protein	Dual specificity protein kinase activity catalyzing autophosphorylation and phosphorylation of exogenous substrates on both serine/threonine and tyrosine residues.	63639.5	6.63	ENZYME
PMID: 27906618 DOI: 10.1080/15257770.2016.1149192	T-cell receptor delta chain (fragment)	T cell receptor (TCR) recognition of peptide-major histocompatibility complexes (pMHCs) is characterized by a highly conserved docking polarity.	63639.5	6.63	RECEPTOR
THE HUMAN PROTEIN ATLAS	FERM domain containing 3	Putative tumor suppressor gene that may be implicated in the origin and progression of lung cancer.	63664	5.68	CELL FUNCTION REGULATOR
PMID: 9027511 DOI: 10.1006/geno.1996.4500	ATP-binding cassette transporter ABC3	The ATP binding cassette (ABC) transporters, or traffic ATPases, constitute a large family of proteins responsible for the transport of a wide variety of substrates across cell membranes in both prokaryotic and eukaryotic cells. We describe a human ABC protein with regions of strong homology to the recently described murine ABC1 and ABC2 transporters. The gene for this novel protein, human ABC3, …	63879.1	5.41	CARRIER
THE HUMAN PROTEIN ATLAS	CD96 molecule	May be involved in adhesive interactions of activated T and NK cells during the late phase of the immune response.	63887.6	6.71	ADHESION
PROSITE	GTP-binding protein ARD 1	Zinc finger RING-type, Zinc finger B-box type, Zinc finger C2H2 type domain, small GTPase Arf family	64066.6	5.93	ADHESION
THE HUMAN PROTEIN ATLAS	Proline rich 14	Functions in tethering peripheral heterochromatin to the nuclear lamina during interphase, possibly through the interaction with heterochromatin protein CBX5/HP1 alpha 1. Might play a role in reattaching heterochromatin to the nuclear lamina at mitotic exit 2. Promotes myoblast differentiation during skeletal myogenesis, possibly by stimulating transcription factor MyoD activity via binding to CB…	64328.5	10.35	STRUCTURAL
THE HUMAN PROTEIN ATLAS	Folylpolyglutamate synthase	Catalyzes conversion of folates to polyglutamate derivatives allowing concentration of folate compounds in the cell and the intracellular retention of these cofactors, which are important substrates for most of the folate-dependent enzymes that are involved in one-carbon transfer reactions involved in purine, pyrimidine and amino acid synthesis.	64623.1	8.17	ENZYME
THE HUMAN PROTEIN ATLAS	Bridging integrator 1	Is a key player in the control of plasma membrane curvature, membrane shaping and membrane remodeling. Required in muscle cells for the formation of T-tubules, tubular invaginations of the plasma membrane that function in depolarization-contraction coupling	64699.4	4.97	CELL CYCLE
THE HUMAN PROTEIN ATLAS	Acyl-CoA synthetase medium chain family member 5	Catalyzes the activation of fatty acids by CoA to produce an acyl-CoA, the first step in fatty acid metabolism.	64760.1	8.69	CATALYTIC ACTIVITY
PROSITE	Immunoglobulin heavy chain constant region α1 (fragment)	Mammalian defensins	64770	8.4	IMMUNOLOGICAL
THE HUMAN PROTEIN ATLAS	Unc-51 like kinase 4	May be involved in the remodeling of cytoskeletal components, such as alpha-tubulin, and in this way regulates neurite branching and elongation, as well as cell motility.	64973.5	6.33	MOTOR
THE HUMAN PROTEIN ATLAS	Unc-51 like kinase 4	May be involved in the remodeling of cytoskeletal components, such as alpha-tubulin, and in this way regulates neurite branching and elongation, as well as cell motility.	64973.5	6.33	MOTOR
UNIPROT	Unc-51 like kinase 4	May be involved in the remodeling of cytoskeletal components, such as alpha-tubulin, and in this way regulates neurite branching and elongation, as well as cell motility.	64973.5	6.33	STRUCTURAL
UNIPROT	Unc-51 like kinase 4	May be involved in the remodeling of cytoskeletal components, such as alpha-tubulin, and in this way regulates neurite branching and elongation, as well as cell motility.	64973.5	6.33	STRUCTURAL
THE HUMAN PROTEIN ATLAS	CCM2 like scaffold protein	Predicted to act upstream of or within several processes, including heart development; negative regulation of homotypic cell-cell adhesion; and positive regulation of fibroblast growth factor production. [provided by Alliance of Genome Resources, Apr 2022]	65189.9	5.94	CELL FUNCTION REGULATOR
THE HUMAN PROTEIN ATLAS	Acyl-CoA synthetase medium chain family member 1	Catalyzes the activation of fatty acids by CoA to produce an acyl-CoA, the first step in fatty acid metabolism 1. Capable of activating medium-chain fatty acids (e.g. butyric (C4) to decanoic (C10) acids), and certain carboxylate-containing xenobiotics, e.g. benzoate 2. Also catalyzes the activation of lipoate to lipoyl-nucleoside monophosphate (By similarity). Activates lipoate with GTP at a 100…	65273.2	8.54	CATALYTIC ACTIVITY
PMCID: PMC3806103 DOI: 10.1007/978-1-61779-854-2_17	Galectin-3-binding protein	the galectins participate in cell-cell and cell-matrix interactions by recognizing and binding complementary glycoconjugates and thereby play a crucial role in normal and pathological processes. Elevated expression of the protein is associated with an increased capacity for anchorage-independent growth, homotypic aggregation, and tumor cell lung colonization	65331	5.12	ADHESION
THE HUMAN PROTEIN ATLAS	Coagulation factor II, thrombin	Thrombin, which cleaves bonds after Arg and Lys, converts fibrinogen to fibrin and activates factors V, VII, VIII, XIII, and, in complex with thrombomodulin, protein C. Functions in blood homeostasis, inflammation and wound healing.	65408.5	5.5	COAGULATION
UNIPROT	Collagen α 1(V) chain precursor	Type V collagen is a member of group I collagen (fibrillar forming collagen). It is a minor connective tissue component of nearly ubiquitous distribution. Type V collagen binds to DNA, heparan sulfate, thrombospondin, heparin, and insulin.	65432.9	8.07	CELLULAR ORGANIZATION
THE HUMAN PROTEIN ATLAS	EF-hand and coiled-coil domain containing 1	It is anticipated that it will allow the binding activity of calcium ions. It is expected to be active in the cytosol	65643.3	5.39	ACTIVATOR
UNIPROT	Cytokeratin 2e	Probably contributes to terminal cornification. Associated with keratinocyte activation, proliferation and keratinization. Plays a role in the establishment of the epidermal barrier on plantar skin	65840.7	8.38	IMMUNOLOGICAL
THE HUMAN PROTEIN ATLAS	Cadherin 18	Cadherins are calcium-dependent cell adhesion proteins. They preferentially interact with themselves in a homophilic manner in connecting cells; cadherins may thus contribute to the sorting of heterogeneous cell types.	65942.4	5.21	ADHESION
THE HUMAN PROTEIN ATLAS	Myotubularin related protein 2	Phosphatase that acts on lipids with a phosphoinositol headgroup. Has phosphatase activity towards phosphatidylinositol 3-phosphate and phosphatidylinositol 3,5-bisphosphate 1, 2, 3, 4. Binds phosphatidylinositol 4-phosphate, phosphatidylinositol 5-phosphate, phosphatidylinositol 3,5-bisphosphate and phosphatidylinositol 3,4,5-trisphosphate	65959.2	7.97	ENZYME
THE HUMAN PROTEIN ATLAS	Keratin 1	May regulate the activity of kinases such as PKC and SRC via binding to integrin beta-1 (ITB1) and the receptor of activated protein C kinase 1 (RACK1). In complex with C1QBP is a high affinity receptor for kininogen-1/HMWK.	66066.7	8,16	CELL FUNCTION REGULATOR
THE HUMAN PROTEIN ATLAS	Phosphodiesterase 6B	Rod-specific cGMP phosphodiesterase that catalyzes the hydrolysis of 3',5'-cyclic GMP 1. Necessary for the formation of a functional phosphodiesterase holoenzyme (By similarity). Involved in retinal circadian rhythm photoentrainment via modulation of UVA and orange light-induced phase-shift of the retina clock (By similarity). May participate in processes of transmission and amplification of the …	66508.4	5.26	CATALYTIC ACTIVITY
THE HUMAN PROTEIN ATLAS	Regulator of solute carriers 1	Mediates transcriptional and post-transcriptional regulation of SLC5A1. Inhibits a dynamin and PKC-dependent exocytotic pathway of SLC5A1. Also involved in transcriptional regulation of SLC22A2. Exhibits glucose-dependent, short-term inhibition of SLC5A1 and SLC22A2 by inhibiting the release of vesicles from the trans-Golgi network.	66789.7	4.78	TRANSCRIPTION
THE HUMAN PROTEIN ATLAS	G protein-coupled receptor 37	Receptor for the neuroprotective and glioprotective factor prosaposin. Ligand binding induces endocytosis, followed by an ERK phosphorylation cascade.	67113.8	8.68	RECEPTOR
THE HUMAN PROTEIN ATLAS	Acetylserotonin O-methyltransferase like	Nucleoside triphosphate pyrophosphatase that hydrolyzes dTTP and UTP. Can also hydrolyze CTP and the modified nucleotides pseudo-UTP, 5-methyl-UTP (m(5)UTP) and 5-methyl-CTP (m(5)CTP). Has weak activity with dCTP, 8-oxo-GTP and N(4)-methyl-dCTP	67134.8	5.81	METABOLIC
THE HUMAN PROTEIN ATLAS	Guanylate binding protein 2	Hydrolyzes GTP to GMP in 2 consecutive cleavage reactions, but the major reaction product is GDP . Exhibits antiviral activity against influenza virus.	67152.9	5.54	ANTIMICROBIAL
THE HUMAN PROTEIN ATLAS	DDB1 and CUL4 associated factor 8 like 1	This gene encodes a member of the WD repeat protein family.	67373.1	4.75	CELL FUNCTION REGULATOR
THE HUMAN PROTEIN ATLAS	Radial spoke head component 4A	Component of the axonemal radial spoke head which plays an important role in ciliary motility 1. Essential for triplet radial spokes (RS1, RS2 and RS3) head assembly in the motile cilia (By similarity).	67406.4	4.74	MOTOR
THE HUMAN PROTEIN ATLAS	Pescadillo ribosomal biogenesis factor 1	Component of the PeBoW complex, which is required for maturation of 28S and 5.8S ribosomal RNAs and formation of the 60S ribosome.	67456	7.21	CELLULAR ORGANIZATION
THE HUMAN PROTEIN ATLAS	Patched domain containing 4	Could act as a repressor of canonical hedgehog signaling by antagonizing the effects of SMO, as suggested by down-regulation of hedgehog target genes, including GLI1, PTCH1, and PTCH2 in PTCHD4-expressing cells.	67513.8	8,20	INHIBITOR
THE HUMAN PROTEIN ATLAS	DM1 locus, WD repeat containing	It is anticipated that it will be located in the dendrite; nucleus; and perikaryon.	67702.3	8.07	CELL FUNCTION REGULATOR
UNIPROT	Ca2+/calmodulin_x0002_dependent protein kinase β-3x	Calcium/calmodulin-dependent protein kinase that operates in the calcium-triggered CaMKK-CaMK4 signaling cascade and regulates, mainly by phosphorylation, the activity of several transcription activators, such as CREB1, MEF2D, JUN and RORA, which play pivotal roles in immune response, inflammation, and memory consolidation. In the thymus, regulates the CD4+/CD8+ double positive thymocytes selecti…	67786.6	8.39	ADHESION
PMID: 28381792 DOI: 10.1248/bpb.b16-01012	Moesin	cross-linkers between plasma membrane proteins and the actin cytoskeleton and are involved in the functional expression of membrane proteins on the cell surface. hey act as protein kinase A (PKA)-anchoring proteins and sequester PKA close to its target proteins for their effective phosphorylation and functional regulation.	67820	6.08	ADHESION
PMID: 20176268 DOI: 10.1016/j.jaci.2009.09.046 (UNIPROT)	Transthyretin	Thyroid hormone-binding protein. Probably transports thyroxine from the bloodstream to the brain.	67877.6	7.58	CARRIER
THE HUMAN PROTEIN ATLAS	Epsin 3	It is anticipated that it will allow clathrin binding activity and phospholipid binding activity. It is anticipated to be involved in endocytosis.	68222.2	5.64	CELLULAR ORGANIZATION
THE HUMAN PROTEIN ATLAS	Arylsulfatase L	Exhibits arylsulfatase activity towards the artificial substrate 4-methylumbelliferyl sulfate. May be essential for the correct composition of cartilage and bone matrix during development	68273.9	6.45	METABOLIC
THE HUMAN PROTEIN ATLAS	Actin related protein 5	Proposed core component of the chromatin remodeling INO80 complex which is involved in transcriptional regulation, DNA replication and probably DNA repair. Involved in DNA double-strand break repair and UV-damage excision repair.	68297.5	5.17	TRANSCRIPTION
THE HUMAN PROTEIN ATLAS	Potassium voltage-gated channel subfamily C member 2	Voltage-gated potassium channel that mediates transmembrane potassium transport in excitable membranes, primarily in the brain	68316.5	7.53	CELL FUNCTION REGULATOR
PMID: 28381792 DOI: 10.1248/bpb.b16-01013	Radixin	cross-linkers between plasma membrane proteins and the actin cytoskeleton and are involved in the functional expression of membrane proteins on the cell surface. hey act as protein kinase A (PKA)-anchoring proteins and sequester PKA close to its target proteins for their effective phosphorylation and functional regulation.	68563.9	6.03	ADHESION
THE HUMAN PROTEIN ATLAS	Ribophorin I	Subunit of the oligosaccharyl transferase (OST) complex that catalyzes the initial transfer of a defined glycan (Glc(3)Man(9)GlcNAc(2) in eukaryotes) from the lipid carrier dolichol-pyrophosphate to an asparagine residue within an Asn-X-Ser/Thr consensus motif in nascent polypeptide chains, the first step in protein N-glycosylation 1. N-glycosylation occurs cotranslationally and the complex assoc…	68606.5	5.96	CATALYTIC ACTIVITY
THE HUMAN PROTEIN ATLAS	Solute carrier family 5 member 5	Mediates iodide uptake in the thyroid gland.	68666.4	7.37	CARRIER
PMID: 1068668 DOI: 10.1111/j.1834-7819.1976.tb02838.x	Acid phosphatase	The level of acid phosphatase in serum increases significantly in cases of metastatic prostatic carcinoma. Enzymes may be detected in parotid saliva by measuring their catalytic effects on appropriate substrates. Acid phosphatase is present in parotid saliva in measurable quantity. If its source is from the blood supply to the gland, the concentration in saliva could be of diagnostic significance.	68677.6	5.48	ENZYME
THE HUMAN PROTEIN ATLAS	α1D-adrenoreceptor (fragment)	The α1D-adrenoreceptor (α1D-AR) is involved in angiotensin II-induced vascular remodeling and hypertension. Whether α1D-AR plays a role in hypertension-associated cardiac hypertrophy is unclear.	68677.6	5.48	RECEPTOR
PMID: 27717746 DOI: 10.1016/j.mce.2016.10.001	Brain and muscle Ah receptor nuclear translocator-like protein	bone remodeling, however, the specific mechanism is still unclear.	68761.8	6.4	OSTEOGENESIS
UNIPROT	Aryl hydrocarbon receptor nuclear translocator like	Transcription factor that plays a role in the development of the hypothalamo-pituitary axis, postnatal brain growth, and visual and renal function	68827.6	8.04	TRANSCRIPTION
THE HUMAN PROTEIN ATLAS	Collagen type VI alpha 5 chain	This gene encodes a member of the collagen superfamily of proteins.	68905.5	6.33	CELL FUNCTION REGULATOR
UNIPROT	UDP-GalNAc:polypeptide N-acetylgalactosaminyl transferase	Triosephosphate isomerase is an extremely efficient metabolic enzyme that catalyzes the interconversion between dihydroxyacetone phosphate (DHAP) and D-glyceraldehyde-3-phosphate (G3P) in glycolysis and gluconeogenesis.	68918.9	8.47	ENZYME
PMID: 22230555 DOI: 10.1016/j.mam.2011.12.002	Serum albumin	It is a multidomain monomeric macromolecule, which represents the main determinant of plasma oncotic pressure and the main modulator of fluid distribution.	69366.7	5.92	ADHESION
PMID: 2993301	Serum albumin precursor	Binds water, Ca2+, Na+, K+, fatty acids, hormones, bilirubin and drugs (Probable). Its main function is the regulation of the colloidal osmotic pressure of blood (Probable). Major zinc transporter in plasma, typically binds about 80% of all plasma zinc	69366.7	5.92	CARRIER
PMID: 28381792 DOI: 10.1248/bpb.b16-01011	Ezrin	cross-linkers between plasma membrane proteins and the actin cytoskeleton and are involved in the functional expression of membrane proteins on the cell surface. hey act as protein kinase A (PKA)-anchoring proteins and sequester PKA close to its target proteins for their effective phosphorylation and functional regulation.	69412.8	5.94	ADHESION
THE HUMAN PROTEIN ATLAS	Kelch like family member 9	Substrate-specific adapter of a BCR (BTB-CUL3-RBX1) E3 ubiquitin-protein ligase complex required for mitotic progression and cytokinesis.	69428.7	5.92	CELL CYCLE
THE HUMAN PROTEIN ATLAS	Interleukin 1 receptor associated kinase 2	(UniProt)i Binds to the IL-1 type I receptor following IL-1 engagement, triggering intracellular signaling cascades leading to transcriptional up-regulation and mRNA stabilization	69433.2	5.51	CELL FUNCTION REGULATOR
[truncated: 391 more rows]
