# Supplementary material
Source: Research Square preprint supplement (doi:10.21203/rs.3.rs-9336410/v1)
Supplement: Supplementary file 2 [file 3ace654f1aeeb5d96ca0bf94.xlsx]

## Sheet: Hoja1
REFERENCE	PROTEINS	FUNCTION	PI	MOLECULAR WEIGHT	TYPE OF FUNCTION								r
UNIPROT	Immunoglobulin heavy constant delta	Constant region of immunoglobulin heavy chains. Immunoglobulins, also known as antibodies, are membrane-bound or secreted glycoproteins produced by B lymphocytes. In the recognition phase of humoral immunity, the membrane-bound immunoglobulins serve as receptors which, upon binding of a specific antigen, trigger the clonal expansion and differentiation of B lymphocytes into immunoglobulins-secret…	3.8	783.91	IMMUNOLOGICAL	783.91
DOI: 10.1002./pmic.200300449	Sex hormone binding globulin	Functions as an androgen transport protein, but may also be involved in receptor mediated processes. Each dimer binds one molecule of steroid.	5.59	1,079.23	CARRIER	1079.23
The Human Protein Atlas	Sex hormone binding globulin	Functions as an androgen transport protein, but may also be involved in receptor mediated processes. Each dimer binds one molecule of steroid. Specific for 5-alpha-dihydrotestosterone, testosterone, and 17-beta-estradiol. Regulates the plasma metabolic clearance rate of steroid hormones by controlling their plasma concentration.	5.59	1,079.23	CARRIER	1079.23
DOI: 10.1002./pmic.200300449	Fibrinopeptide	Fibrin plays an important role in hemostasis	3.92	1536.57	COAGULATION	1536.57
DOI: 10.1002./pmic.200300449	Fibrinopeptide	Fibrin plays an important role in hemostasis	4	1570.59	COAGULATION	1570.59
UNIPROT	Immunoglobulin delta heavy chain	Immunoglobulins, also known as antibodies, are membrane-bound or secreted glycoproteins produced by B lymphocytes. In the recognition phase of humoral immunity, the membrane-bound immunoglobulins serve as receptors which, upon binding of a specific antigen, trigger the clonal expansion and differentiation of B lymphocytes into immunoglobulins-secreting plasma cells. Secreted immunoglobulins media…	3.80	1783.91	IMMUNOLOGICAL	1783.91
The Human Protein Atlas	MT-RNR2 like 8	Plays a role as a neuroprotective and antiapoptotic factor.	9.49	2661.18	INHIBITOR	2661.18
The Human Protein Atlas	MT-RNR2 like 1	Plays a role as a neuroprotective and antiapoptotic factor.	9.49	2,691.20	INHIBITOR	2691.2
The Human Protein Atlas	MT-RNR2 like 6	Plays a role as a neuroprotective and antiapoptotic factor.	9.48	2719.21	INHIBITOR	2719.21
The Human Protein Atlas	MT-RNR2 like 11	Plays a role as a neuroprotective and antiapoptotic factor.	7.98	2,737.31	INHIBITOR	2737.31
The Human Protein Atlas	MT-RNR2 like 10	Plays a role as a neuroprotective and antiapoptotic factor.	10.69	2,806.42	INHIBITOR	2806.42
The Human Protein Atlas	MT-RNR2 like 4	Plays a role as a neuroprotective and antiapoptotic factor.	9.19	3246.85	INHIBITOR	3246.85
UNIPROT	Leptin	Key player in the regulation of energy balance and body weight control. Once released into the circulation, has central and peripheral effects by binding LEPR, found in many tissues, which results in the activation of several major signaling pathways 1, 2, 3. In the hypothalamus, acts as an appetite-regulating factor that induces a decrease in food intake and an increase in energy consumption by …	8.39	4545.3	CELL FUNCTION REGULATOR	4545.3
UNIPROT	ATP synthase subunit a	produces ATP from ADP in the presence of a proton gradient across the membrane which is generated by electron transport complexes of the respiratory chain. F-type ATPases consist of two structural domains, F(1) - containing the extramembraneous catalytic core and F(0) - containing the membrane proton channel, linked together by a central stalk and a peripheral stalk. During catalysis, ATP synthes…	5.98	4827.87	ENZYME	4827.87
UNIPROT	Extracellular superoxide dismutase	Protect the extracellular space from toxic effect of reactive oxygen intermediates by converting superoxide radicals into hydrogen peroxide and oxygen.	9.24	5041.7	INHIBITOR	5041.7
The Human Protein Atlas	Amyloid P component, serum	Can interact with DNA and histones and may scavenge nuclear material released from damaged circulating cells. May also function as a calcium-dependent lectin.	4.32	5298.19	CARRIER	5298.19
UNIPROT	Sphingosine kinase 2	Catalyzes the phosphorylation of sphingosine to form sphingosine-1-phosphate (SPP), a lipid mediator with both intra- and extracellular functions. Also acts on D-erythro-dihydrosphingosine, D-erythro-sphingosine and L-threo-dihydrosphingosine. Binds phosphoinositides 1, 2. In contrast to prosurvival SPHK1, has a positive effect on intracellular ceramide levels, inhibits cells growth and enhances …	5.51	5388.03	CATALYTIC ACTIVITY	5388.03
The Human Protein Atlas	Paraoxonase 2	Capable of hydrolyzing lactones and a number of aromatic carboxylic acid esters. Has antioxidant activity. Is not associated with high density lipoprotein. Prevents LDL lipid peroxidation, reverses the oxidation of mildly oxidized LDL, and inhibits the ability of MM-LDL to induce monocyte chemotaxis.	10.03	5,471.65	ENZYME	5471.65
The Human Protein Atlas	Tachykinin precursor 4	Tachykinins are active peptides which excite neurons, evoke behavioral responses, are potent vasodilators and secretagogues, and contract (directly or indirectly) many smooth muscles. Endokinin-A induces thermal hyperalgesia and pain-related behavior such as scratching following intrathecal administration in rats. These effects are suppressed by treatment with endokinin-C. Endokinin-A/B reduces a…	11.87	5,547.41	MOTOR	5547.41
The Human Protein Atlas	IgA inducing protein	Enhances IgA secretion from B-cells stimulated via CD40.	9.13	5,936.93	IMMUNOLOGICAL	5936.93
The Human Protein Atlas	Bactericidal permeability increasing protein	The cytotoxic action of BPI is limited to many species of Gram-negative bacteria; this specificity may be explained by a strong affinity of the very basic N-terminal half for the negatively charged lipopolysaccharides that are unique to the Gram-negative bacterial outer envelope.	4.94	5,959.9	IMMUNOLOGICAL	5959.9
The Human Protein Atlas	Histocompatibility minor serpin domain containing	Putative serine protease inhibitor. [A8MTL9] This allelic splice variant of HMSD is the precursor of the histocompatibility antigen ACC-6	5.01	6,023.13	IMMUNOLOGICAL	6023.13
UNIPROT	Mitogen-activated protein kinase kinase kinase 3	Plays a role in various cellular processes such as proliferation, differentiation and cell survival. The upstream activator of MAPK7 is the MAPK kinase MAP2K5. Upon activation, it translocates to the nucleus and phosphorylates various downstream targets including MEF2C. EGF activates MAPK7 through a Ras-independent and MAP2K5-dependent pathway. As part of the MAPK/ERK signaling pathway, acts as a…	6.03	6030.26	CELL FUNCTION REGULATOR	6030.26
The Human Protein Atlas	Adhesion G protein-coupled receptor E3	Orphan receptor that may play a role myeloid-myeloid interactions during immune and inflammatory responses.	7.68	6104.15	IMMUNOLOGICAL	6104.15
UNIPROT	Hepatic triacylglycerol lipase	Catalyzes the hydrolysis of triglycerides and phospholipids present in circulating plasma lipoproteins, including chylomicrons, intermediate density lipoproteins (IDL), low density lipoproteins (LDL) of large size and high density lipoproteins (HDL), releasing free fatty acids (FFA) and smaller lipoprotein particles 1, 2, 3, 4. Also exhibits lysophospholipase activity (By similarity). Can hydroly…	8.93	6312.96	CATALYTIC ACTIVITY	6312.96
UNIPROT	Apelin receptor early endogenous ligand	Endogenous ligand for the apelin receptor (APLNR) 1, 2. Hormone required for mesendodermal differentiation, blood vessels formation and heart morphogenesis during early development and for adult cardiovascular homeostasis 3, 4. Drives internalization of APLNR. Acts as a motogen by promoting mesendodermal cell migration during gastrulation by binding and activating APLNR. Acts as an early embryoni…	12.22	6622.12	CELL FUNCTION REGULATOR	6622.12
The Human Protein Atlas	Galectin 3 binding protein	Promotes integrin-mediated cell adhesion. May stimulate host defense against viruses and tumor cells.	5	6,701.77	ADHESION	6701.77
The Human Protein Atlas	Paraoxonase 3	Has low activity towards the organophosphate paraxon and aromatic carboxylic acid esters. Rapidly hydrolyzes lactones such as statin prodrugs (e.g. lovastatin). Hydrolyzes aromatic lactones and 5-or 6-member ring lactones with aliphatic substituents but not simple lactones or those with polar substituents.	6.72	6,743.03	ENZYME	6743.03
The Human Protein Atlas	C-X-C motif chemokine ligand 17	Chemokine that acts as chemoattractant for monocytes, macrophages and dendritic cells 1, 2. Plays a role in angiogenesis and possibly in the development of tumors	9.49	6845.17	IMMUNOLOGICAL	6845.17
The Human Protein Atlas	C-C motif chemokine ligand 4 like 2	Chemokine that induces chemotaxis of cells expressing CCR5 or CCR1. Inhibits HIV replication in peripheral blood monocytes that express CCR5.	7.59	6,850.13	INHIBITOR	6850.13
The Human Protein Atlas	Lymphotoxin alpha	Cytokine that in its homotrimeric form binds to TNFRSF1A/TNFR1, TNFRSF1B/TNFBR and TNFRSF14/HVEM	12.01	6,973.40	IMMUNOLOGICAL	6973.4
The Human Protein Atlas	C-C motif chemokine ligand 2	Acts as a ligand for C-C chemokine receptor CCR2. Signals through binding and activation of CCR2 and induces a strong chemotactic response and mobilization of intracellular calcium ions	9.62	7,101.5	SIGNAL	7101.5
The Human Protein Atlas	Coagulation factor VII	Initiates the extrinsic pathway of blood coagulation. Serine protease that circulates in the blood in a zymogen form.	10.22	7,152.29	COAGULATION	7152.29
The Human Protein Atlas	C-C motif chemokine ligand 14	Has weak activities on human monocytes and acts via receptors that also recognize MIP-1 alpha.	7.71	7356.49	INFLAMMATORY	7356.49
UNIPROT	Appetite-regulating hormone	Ghrelin is the ligand for growth hormone secretagogue receptor type 1 (GHSR) 1. Induces the release of growth hormone from the pituitary 2. Has an appetite-stimulating effect, induces adiposity and stimulates gastric acid secretion. Involved in growth regulation.	5.62	7460.47	ACTIVATOR	7460.47
The Human Protein Atlas	Serine carboxypeptidase 1	May be involved in vascular wall and kidney homeostasis.	10.31	7,536.08	COAGULATION	7536.08
The Human Protein Atlas	FAM3 metabolism regulating signaling molecule A	May act as a defensin against invading fungal microorganisms.	12	7562.07	ANTIMICROBIAL	7562.07
The Human Protein Atlas	Phospholipase A2 group XIIA	PA2 catalyzes the calcium-dependent hydrolysis of the 2-acyl groups in 3-sn-phosphoglycerides. Does not exhibit detectable activity toward sn-2-arachidonoyl-or linoleoyl-phosphatidylcholine or -phosphatidylethanolamine.	6.52	7676.97	STRUCTURAL	7676.97
The Human Protein Atlas	Torsin family 2 member A	Salusins -alpha and -beta may be endocrine and/or paracrine factors able to increase intracellular calcium concentrations and induce cell mitogenesis. Salusins may also be potent hypotensive peptides. [Q8N2E6]	5.12	7703.98	CELL CYCLE	7703.98
UNIPROT	Deoxyribonuclease-1	Serum endocuclease secreted into body fluids by a wide variety of exocrine and endocrine organs 1, 2, 3. Expressed by non-hematopoietic tissues and preferentially cleaves protein-free DNA (By similarity). Among other functions, seems to be involved in cell death by apoptosis 4. Binds specifically to G-actin and blocks actin polymerization (By similarity). Together with DNASE1L3, plays a key role …	4.66	7755.92	CELL DEATH	7755.92
The Human Protein Atlas	TNF receptor superfamily member 1A	Receptor for TNFSF2/TNF-alpha and homotrimeric TNFSF1/lymphotoxin-alpha. The adapter molecule FADD recruits caspase-8 to the activated receptor. The resulting death-inducing signaling complex (DISC) performs caspase-8 proteolytic activation which initiates the subsequent cascade of caspases (aspartate-specific cysteine proteases) mediating apoptosis. Contributes to the induction of non-cytocidal …	6.8	7807.16	RECEPTOR	7807.16
The Human Protein Atlas	Small vasohibin binding protein	Enhances the tyrosine carboxypeptidase activity of VASH1 and VASH2, thereby promoting the removal of the C-terminal tyrosine residue of alpha-tubulin	9.21	7,807.92	ACTIVATOR	7807.92
The Human Protein Atlas	Interleukin 12B	Cytokine that can act as a growth factor for activated T and NK cells, enhance the lytic activity of NK/lymphokine-activated killer cells, and stimulate the production of IFN-gamma by resting PBMC.	4.41	7815.54	CELL CYCLE	7815.54
The Human Protein Atlas	Nucleobindin 1	Major calcium-binding protein of the Golgi which may have a role in calcium homeostasis (By similarity). Acts as a non-receptor guanine nucleotide exchange factor which binds to and activates alpha subunits of guanine nucleotide-binding proteins (G proteins) (By similarity).	8.49	7,886.51	ADHESION	7886.51
The Human Protein Atlas	Galectin 9	Binds galactosides. Has high affinity for the Forssman pentasaccharide	5.5	7,898.72	ADHESION	7898.72
The Human Protein Atlas	Glutathione peroxidase 3	Protects cells and enzymes from oxidative damage, by catalyzing the reduction of hydrogen peroxide, lipid peroxides and organic hydroperoxide, by glutathione.	6.42	7,902.11	CATALYTIC ACTIVITY	7902.11
UNIPROT	ATP synthase protein 8	produces ATP from ADP in the presence of a proton gradient across the membrane which is generated by electron transport complexes of the respiratory chain. F-type ATPases consist of two structural domains, F(1) - containing the extramembraneous catalytic core and F(0) - containing the membrane proton channel, linked together by a central stalk and a peripheral stalk. During catalysis, ATP synthes…	9.92	7991.65	ENZYME	7991.65
The Human Protein Atlas	Apolipoprotein C2	Component of chylomicrons, very low-density lipoproteins (VLDL), low-density lipoproteins (LDL), and high-density lipoproteins (HDL) in plasma. Plays an important role in lipoprotein metabolism as an activator of lipoprotein lipase. Both proapolipoprotein C-II and apolipoprotein C-II can activate lipoprotein lipase. In normolipidemic individuals, it is mainly distributed in the HDL, whereas in hy…	4.86	8146.36	METABOLIC	8146.36
The Human Protein Atlas	Marginal zone B and B1 cell specific protein	Associates with immunoglobulin M (IgM) heavy and light chains and promotes IgM assembly and secretion.	5.78	8,226.58	BIOMARKER	8226.58
The Human Protein Atlas	Adenosine deaminase 2	Adenosine deaminase that may contribute to the degradation of extracellular adenosine, a signaling molecule that controls a variety of cellular responses.	5.43	8,238.32	METABOLIC	8238.32
The Human Protein Atlas	SPARC (osteonectin), cwcv and kazal like domains proteoglycan 2	May participate in diverse steps of neurogenesis. Binds calcium.	5.68	8,311.41	INHIBITOR	8311.41
The Human Protein Atlas	Apolipoprotein C4	May participate in lipoprotein metabolism.	9.57	8,367.00	CARRIER	8367
UNIPROT	Mitogen-activated protein kinase 7	Plays a role in various cellular processes such as proliferation, differentiation and cell survival. The upstream activator of MAPK7 is the MAPK kinase MAP2K5. Upon activation, it translocates to the nucleus and phosphorylates various downstream targets including MEF2C. EGF activates MAPK7 through a Ras-independent and MAP2K5-dependent pathway. As part of the MAPK/ERK signaling pathway, acts as a…	4.51	8387.29	CELL FUNCTION REGULATOR	8387.29
The Human Protein Atlas	Spexin hormone	Plays a role as a central modulator of cardiovascular and renal function and nociception. Plays also a role in energy metabolism and storage. Inhibits adrenocortical cell proliferation with minor stimulation on corticosteroid release (By similarity).	6.18	8,741.89	CELL FUNCTION REGULATOR	8741.89
The Human Protein Atlas	Protein tyrosine kinase 7 (inactive)	Inactive tyrosine kinase involved in Wnt signaling pathway. Component of both the non-canonical (also known as the Wnt/planar cell polarity signaling) and the canonical Wnt signaling pathway. Functions in cell adhesion, cell migration, cell polarity, proliferation, actin cytoskeleton reorganization and apoptosis. Has a role in embryogenesis, epithelial tissue organization and angiogenesis	6.03	8,842.92	SIGNAL	8842.92
The Human Protein Atlas	Immunoglobulin lambda like polypeptide 5	This gene encodes one of the immunoglobulin lambda-like polypeptides. It is located within the immunoglobulin lambda locus but it does not require somatic rearrangement for expression. The first exon of this gene is unrelated to immunoglobulin variable genes; the second and third exons are the immunoglobulin lambda joining 1 and the immunoglobulin lambda constant 1 gene segments. Alternative spli…	9.67	8,843.2	IMMUNOLOGICAL	8843.2
The Human Protein Atlas	Insulin like growth factor binding protein 6	IGF-binding proteins prolong the half-life of the IGFs and have been shown to either inhibit or stimulate the growth promoting effects of the IGFs on cell culture. They alter the interaction of IGFs with their cell surface receptors. Activates the MAPK signaling pathway and induces cell migration	9.55	8,947.02	INHIBITOR	8947.02
The Human Protein Atlas	Family with sequence similarity 177 member A1	This gene encodes a member of a conserved protein family. Alternative splicing results in multiple transcript variants. This gene is thought to be associated with susceptibility to juvenile idiopathic arthritis.	6.12	8,992.38	TRANSCRIPTION	8992.38
DOI: 10.1002./pmic.200300449	Carbonic anhydrase 1	Reversible hydration of carbon dioxide. Can hydrates cyanamide to urea.	5.09	9,016.84	CELL FUNCTION REGULATOR	9016.84
The Human Protein Atlas	Interleukin 4 induced 1	Secreted L-amino-acid oxidase that acts as a key immunoregulator	9.71	9,131.3	IMMUNOLOGICAL	9131.3
The Human Protein Atlas	C-C motif chemokine ligand 28	Chemotactic activity for resting CD4, CD8 T-cells and eosinophils. Binds to CCR3 and CCR10 and induces calcium mobilization in a dose-dependent manner.	10.5	9,257.71	IMMUNOLOGICAL	9257.71
UNIPROT	Hereditary hemochromatosis protein	Binds to transferrin receptor (TFR) and reduces its affinity for iron-loaded transferrin.	6.05	9316.92	CELL FUNCTION REGULATOR	9316.92
The Human Protein Atlas	Apolipoprotein C l	Inhibitor of lipoprotein binding to the low density lipoprotein (LDL) receptor, LDL receptor-related protein, and very low density lipoprotein (VLDL) receptor.	8.01	9,331.93	CARRIER	9331.93
The Human Protein Atlas	Hepcidin antimicrobial peptide	Liver-produced hormone that constitutes the main circulating regulator of iron absorption and distribution across tissues. Acts by promoting endocytosis and degradation of ferroportin, leading to the retention of iron in iron-exporting cells and decreased flow of iron into plasma.	9.24	9,408.19	ANTIMICROBIAL	9408.19
The Human Protein Atlas	C-C motif chemokine ligand 25	Potentially involved in T-cell development. Recombinant protein shows chemotactic activity on thymocytes, macrophages, THP-1 cells, and dendritics cells but is inactive on peripheral blood lymphocytes and neutrophils.	7.39	9,496.24	IMMUNOLOGICAL	9496.24
UNIPROT	Alpha-N-acetylgalactosaminide alpha-2,6-sialyltransferase 6	Transfers the sialyl group (N-acetyl-alpha-neuraminyl or NeuAc) from CMP-NeuAc onto glycoproteins and glycolipids, forming an alpha-2,6-linkage. Produces branched type disialyl structures by transfer of a sialyl group onto the GalNAc or GlcNAc residue inside backbone core chains having a terminal sialic acid with an alpha-2,3-linkage on Gal. ST6GalNAcVI prefers glycolipids to glycoproteins, predo…	9.99	9651.12	CATALYTIC ACTIVITY	9651.12
The Human Protein Atlas	Vasohibin 1	Tyrosine carboxypeptidase that removes the C-terminal tyrosine residue of alpha-tubulin, thereby regulating microtubule dynamics and function. Critical for spindle function and accurate chromosome segregation during mitosis since microtuble detyronisation regulates mitotic spindle length and postioning. Acts as an angiogenesis inhibitor: inhibits migration, proliferation and network formation by …	8.91	9,707.27	INHIBITOR	9707.27
The Human Protein Atlas	Islet amyloid polypeptide	Selectively inhibits insulin-stimulated glucose utilization and glycogen deposition in muscle, while not affecting adipocyte glucose metabolism.	9.83	9,806.43	INHIBITOR	9806.43
The Human Protein Atlas	Glucose-fructose oxidoreductase domain containing 2	Promotes matrix assembly.	4.81	9,830.41	ENZYME	9830.41
The Human Protein Atlas	C-C motif chemokine ligand 18	Chemotactic factor that attracts lymphocytes but not monocytes or granulocytes. May be involved in B-cell migration into B-cell follicles in lymph nodes.	9.06	9,848.78	IMMUNOLOGICAL	9848.78
The Human Protein Atlas	Apolipoprotein C1	nhibitor of lipoprotein binding to the low density lipoprotein (LDL) receptor, LDL receptor-related protein, and very low density lipoprotein (VLDL) receptor. Associates with high density lipoproteins (HDL) and the triacylglycerol-rich lipoproteins in the plasma and makes up about 10% of the protein of the VLDL and 2% of that of HDL. Appears to interfere directly with fatty acid uptake and is als…	5.09	9976.44	INHIBITOR	9976.44
The Human Protein Atlas	C-C motif chemokine ligand 5	Chemoattractant for blood monocytes, memory T-helper cells and eosinophils.	9.27	9,989.66	IMMUNOLOGICAL	9989.66
The Human Protein Atlas	KIAA0100	May be involved in membrane trafficking.	10.54	10,002.95	CELL DEATH	10003
The Human Protein Atlas	Ficolin 2	May function in innate immunity through activation of the lectin complement pathway. Calcium-dependent and GlcNAc-binding lectin. Enhances phagocytosis of S.typhimurium by neutrophils, suggesting an opsonic effect via the collagen region.	5.28	10023.5	IMMUNOLOGICAL	10023.5
The Human Protein Atlas	Ectonucleoside triphosphate diphosphohydrolase 5 (inactive)	Uridine diphosphatase (UDPase) that promotes protein N-glycosylation and ATP level regulation. UDP hydrolysis promotes protein N-glycosylation and folding in the endoplasmic reticulum, as well as elevated ATP consumption in the cytosol via an ATP hydrolysis cycle.	8.86	10,023.67	BIOMARKER	10023.7
The Human Protein Atlas	Secretoglobin family 3A member 1	Secreted cytokine-like protein. Inhibits cell growth in vitro.	8.57	10,100.06	SECRETOR	10100.1
The Human Protein Atlas	Trefoil factor 3	Involved in the maintenance and repair of the intestinal mucosa. Promotes the mobility of epithelial cells in healing processes (motogen).	6.52	10180.9	MOTOR	10180.9
The Human Protein Atlas	Defensin alpha 3	Defensin 2 and defensin 3 have antibiotic, fungicide and antiviral activities. Has antimicrobial activity against Gram-negative and Gram-positive bacteria. Defensins are thought to kill microbes by permeabilizing their plasma membrane.	6.53	10,200.95	ANTIMICROBIAL	10201
The Human Protein Atlas	Defensin alpha 1B	Defensin 1 and defensin 2 have antibacterial, fungicide and antiviral activities. Has antimicrobial activity against Gram-negative and Gram-positive bacteria. Defensins are thought to kill microbes by permeabilizing their plasma membrane.	6.54	10,200.95	ANTIMICROBIAL	10201
The Human Protein Atlas	Defensin alpha 1	Defensin 1 and defensin 2 have antibacterial, fungicide and antiviral activities. Has antimicrobial activity against Gram-negative and Gram-positive bacteria. Defensins are thought to kill microbes by permeabilizing their plasma membrane.	5.71	10,244.96	ANTIMICROBIAL	10245
The Human Protein Atlas	Serine peptidase inhibitor Kazal type 2	As a strong inhibitor of acrosin, it is required for normal spermiogenesis. It probably hinders premature activation of proacrosin and other proteases, thus preventing the cascade of events leading to spermiogenesis defects 1. May be involved in the regulation of serine protease-dependent germ cell apoptosis (By similarity). It also inhibits trypsin.	4.31	10,265.81	INHIBITOR	10265.8
The Human Protein Atlas	C-X-C motif chemokine ligand 11	Chemotactic for interleukin-activated T-cells but not unstimulated T-cells, neutrophils or monocytes. Induces calcium release in activated T-cells.	9.94	10,364.61	IMMUNOLOGICAL	10364.6
The Human Protein Atlas	Gonadotropin releasing hormone 1	Stimulates the secretion of gonadotropins; it stimulates the secretion of both luteinizing and follicle-stimulating hormones.	6.1	10,379.92	SECRETOR	10379.9
The Human Protein Atlas	Defensin alpha 4	Has antimicrobial activity against Gram-negative bacteria, and to a lesser extent also against Gram-positive bacteria and fungi. Protects blood cells against infection with HIV-1 (in vitro).	8.3	10,504.18	ANTIMICROBIAL	10504.2
The Human Protein Atlas	C-C motif chemokine ligand 17	Chemotactic factor for T-lymphocytes but not monocytes or granulocytes. May play a role in T-cell development in thymus and in trafficking and activation of mature T-cells.	9.59	10,507.32	IMMUNOLOGICAL	10507.3
UNIPROT	Protein S100-A12	S100A12 is a calcium-, zinc- and copper-binding protein which plays a prominent role in the regulation of inflammatory processes and immune response. Its pro-inflammatory activity involves recruitment of leukocytes, promotion of cytokine and chemokine production, and regulation of leukocyte adhesion and migration. Acts as an alarmin or a danger associated molecular pattern (DAMP) molecule and sti…	5.81	10575	INFLAMMATORY	10575
The Human Protein Atlas	S100 calcium binding protein A12	S100A12 is a calcium-, zinc- and copper-binding protein which plays a prominent role in the regulation of inflammatory processes and immune response. Its proinflammatory activity involves recruitment of leukocytes, promotion of cytokine and chemokine production, and regulation of leukocyte adhesion and migration. Acts as an alarmin or a danger associated molecular pattern (DAMP) molecule and stim…	5.81	10,575.04	ADHESION	10575
The Human Protein Atlas	C-C motif chemokine ligand 22	May play a role in the trafficking of activated/effector T-lymphocytes to inflammatory sites and other aspects of activated T-lymphocyte physiology.	9.07	10,580.56	ANTI-INFLAMMATORY	10580.6
UNIPROT	Myocardin-related transcription factor A	Transcription coactivator that associates with the serum response factor (SRF) transcription factor to control expression of genes regulating the cytoskeleton during development, morphogenesis and cell migration 1. The SRF-MRTFA complex activity responds to Rho GTPase-induced changes in cellular globular actin (G-actin) concentration, thereby coupling cytoskeletal gene expression to cytoskeletal …	3.55	10601.9	TRANSCRIPTION	10601.9
The Human Protein Atlas	C-C motif chemokine ligand 26	Chemoattractant for eosinophils and basophils	10.22	10,647.59	IMMUNOLOGICAL	10647.6
UNIPROT	Small ubiquitin-related modifier 4	Ubiquitin-like protein which can be covalently attached to target lysines as a monomer. Does not seem to be involved in protein degradation and may modulate protein subcellular localization, stability or activity. Upon oxidative stress, conjugates to various anti-oxidant enzymes, chaperones, and stress defense proteins. May also conjugate to NFKBIA, TFAP2A and FOS, negatively regulating their tra…	6.56	10653.1	METABOLIC	10653.1
UNIPROT	Platelet-derived growth factor receptor beta	Tyrosine-protein kinase that acts as a cell-surface receptor for homodimeric PDGFB and PDGFD and for heterodimers formed by PDGFA and PDGFB, and plays an essential role in the regulation of embryonic development, cell proliferation, survival, differentiation, chemotaxis and migration. Plays an essential role in blood vessel development by promoting proliferation, migration and recruitment of peri…	3.88	10653.1	CELL FUNCTION REGULATOR	10653.1
The Human Protein Atlas	C-C motif chemokine ligand 20	Acts as a ligand for C-C chemokine receptor CCR6. Signals through binding and activation of CCR6 and induces a strong chemotactic response and mobilization of intracellular calcium ions	9.21	10,690.85	SIGNAL	10690.9
The Human Protein Atlas	C-C motif chemokine ligand 11	In response to the presence of allergens, this protein directly promotes the accumulation of eosinophils, a prominent feature of allergic inflammatory reactions	9.98	10,731.83	INFLAMMATORY	10731.8
DOI: 10.1002./pmic.200300449	Complement factor C2	Component C2 which is part of the classical pathway of the complement system is cleaved by activated factor C1 into two fragments: C2b and C2a. C2a, a serine protease, then combines with complement factor C4b to generate the C3 or C5 convertase.	8.65	10,784.59	IMMUNOLOGICAL	10784.6
The Human Protein Atlas	Serine peptidase inhibitor Kazal type 8 (putative)	Probable serine protease inhibitor.	4.9	10,820.6	INHIBITOR	10820.6
DOI: 10.1002./pmic.200300449	Apolipoprotein C-III	Plays a multifaceted role in triglyceride homeostasis.	5.23	10,822.28	CELL FUNCTION REGULATOR	10822.3
DOI: 10.1002./pmic.200300449	Apolipoprotein C-III	Plays a multifaceted role in triglyceride homeostasis.	6.076	10,822.28	CARRIER	10822.3
UNIPROT	Protein S100-A8	S100A12 is a calcium-, zinc- and copper-binding protein which plays a prominent role in the regulation of inflammatory processes and immune response. Its pro-inflammatory activity involves recruitment of leukocytes, promotion of cytokine and chemokine production, and regulation of leukocyte adhesion and migration. Acts as an alarmin or a danger associated molecular pattern (DAMP) molecule and sti…	6.50	10834.5	INFLAMMATORY	10834.5
The Human Protein Atlas	S100 calcium binding protein A8	S100A8 is a calcium- and zinc-binding protein which plays a prominent role in the regulation of inflammatory processes and immune response. It can induce neutrophil chemotaxis and adhesion. Predominantly found as calprotectin	6.5	10,834.51	ADHESION	10834.5
The Human Protein Atlas	Neuropeptide Y	NPY is implicated in the control of feeding and in secretion of gonadotrophin-release hormone.	6.57	10,851.45	CELL FUNCTION REGULATOR	10851.5
The Human Protein Atlas	Apolipoprotein C3	Component of triglyceride-rich very low density lipoproteins (VLDL) and high density lipoproteins (HDL) in plasma 1, 2. Plays a multifaceted role in triglyceride homeostasis 3, 4. Intracellularly, promotes hepatic very low density lipoprotein 1 (VLDL1) assembly and secretion; extracellularly, attenuates hydrolysis and clearance of triglyceride-rich lipoproteins (TRLs) 5, 6. Impairs the lipolysis …	5.23	10852.3	METABOLIC	10852.3
The Human Protein Atlas	C-X-C motif chemokine ligand 10	Pro-inflammatory cytokine that is involved in a wide variety of processes such as chemotaxis, differentiation, and activation of peripheral immune cells, regulation of cell growth, apoptosis and modulation of angiostatic effects	9.93	10,881.06	INFLAMMATORY	10881.1
The Human Protein Atlas	Bone gamma-carboxyglutamate protein	Constitutes 1-2% of the total bone protein. It binds strongly to apatite and calcium.	6.56	10962.58	ADHESION	10962.6
The Human Protein Atlas	Plasminogen like B2	May bind noncovalently to lysine binding sites present in the kringle structures of plasminogen. This may interfere with the binding of fibrin or alpha-2-antiplasmin to plasminogen and may result in the localization of activity at sites necessary for extracellular matrix destruction.	6.11	10,970.64	COAGULATION	10970.6
The Human Protein Atlas	Plasminogen like B1	May bind noncovalently to lysine binding sites present in the kringle structures of plasminogen. This may interfere with the binding of fibrin or alpha-2-antiplasmin to plasminogen and may result in the localization of activity at sites necessary for extracellular matrix destruction.	6.11	10970.64	COAGULATION	10970.6
The Human Protein Atlas	C-C motif chemokine ligand 13	Chemotactic factor that attracts monocytes, lymphocytes, basophils and eosinophils, but not neutrophils.	9.94	10,986.16	IMMUNOLOGICAL	10986.2
The Human Protein Atlas	C-C motif chemokine ligand 1	Cytokine that is chemotactic for monocytes but not for neutrophils. Binds to CCR8.	9.3	10,992.05	INFLAMMATORY	10992
The Human Protein Atlas	Peptide YY	This gut peptide inhibits exocrine pancreatic secretion, has a vasoconstrictory action and inhibitis jejunal and colonic mobility.	6.56	11,045.64	INHIBITOR	11045.6
The Human Protein Atlas	C-X-C motif chemokine ligand 8	IL-8 is a chemotactic factor that attracts neutrophils, basophils, and T-cells, but not monocytes.	9.1	11,098.12	IMMUNOLOGICAL	11098.1
DOI: 10.1002./pmic.200300449	Apolipoprotein A-II	May stabilize HDL (high density lipoprotein) structure by its association with lipids, and affect the HDL metabolism.	6.27	11175	STRUCTURAL	11175
The Human Protein Atlas	Apolipoprotein A2	May stabilize HDL (high density lipoprotein) structure by its association with lipids, and affect the HDL metabolism.	6.27	11175	STRUCTURAL	11175
DOI: 10.1002./pmic.200300449	Apolipoprotein A-II	May stabilize HDL (high density lipoprotein) structure by its association with lipids, and affect the HDL metabolism.	6.27	11,175.02	CARRIER	11175
The Human Protein Atlas	C-C motif chemokine ligand 7	Chemotactic factor that attracts monocytes and eosinophils, but not neutrophils. Augments monocyte anti-tumor activity. Also induces the release of gelatinase B.	9.72	11,200.19	IMMUNOLOGICAL	11200.2
The Human Protein Atlas	C-C motif chemokine ligand 8	Chemotactic factor that attracts monocytes, lymphocytes, basophils and eosinophils. May play a role in neoplasia and inflammatory host responses. This protein can bind heparin.	9.47	11,246.36	INFLAMMATORY	11246.4
DOI: 10.1002./pmic.200300449	Dermcidin	Displays antimicrobial activity thereby limiting skin infection by potential pathogens in the first few hours after bacterial colonization.	6.09	11283.9	ANTIMICROBIAL	11283.9
DOI: 10.1002./pmic.200300449	Apolipoprotein C-II	lays an important role in lipoprotein metabolism as an activator of lipoprotein lipase.	4.56	11,283.87	METABOLIC	11283.9
The Human Protein Atlas	C-X-C motif chemokine ligand 1	Has chemotactic activity for neutrophils. May play a role in inflammation and exerts its effects on endothelial cells in an autocrine fashion.	10.46	11,301.42	INFLAMMATORY	11301.4
The Human Protein Atlas	C-C motif chemokine ligand 19	May play a role not only in inflammatory and immunological responses but also in normal lymphocyte recirculation and homing. May play an important role in trafficking of T-cells in thymus, and T-cell and B-cell migration to secondary lymphoid organs.	9.16	11,340.38	IMMUNOLOGICAL	11340.4
The Human Protein Atlas	C-X-C motif chemokine ligand 3	May play a role in inflammation and exert its effects on endothelial cells in an autocrine fashion.	10.4	11,342.47	INFLAMMATORY	11342.5
The Human Protein Atlas	C-X-C motif chemokine ligand 2	Hematoregulatory chemokine, which, in vitro, suppresses hematopoietic progenitor cell proliferation.	10.57	11,388.68	CELL FUNCTION REGULATOR	11388.7
The Human Protein Atlas	Resistin	Hormone that seems to suppress insulin ability to stimulate glucose uptake into adipose cells (By similarity). Potentially links obesity to diabetes (By similarity). Promotes chemotaxis in myeloid cells	6.52	11,419.34	HORMONE	11419.3
The Human Protein Atlas	Glycoprotein hormones, alpha polypeptide	Shared alpha chain of the active heterodimeric glycoprotein hormones thyrotropin/thyroid stimulating hormone/TSH, lutropin/luteinizing hormone/LH, follitropin/follicle stimulating hormone/FSH and choriogonadotropin/CG.	8.74	11,421.24	HORMONE	11421.2
The Human Protein Atlas	Fas cell surface death receptor	The adapter molecule FADD recruits caspase-8 to the activated receptor. The resulting death-inducing signaling complex (DISC) performs caspase-8 proteolytic activation which initiates the subsequent cascade of caspases (aspartate-specific cysteine proteases) mediating apoptosis.	7.8	11,435.05	ACTIVATOR	11435
The Human Protein Atlas	Pancreatic polypeptide	Pancreatic hormone is synthesized in pancreatic islets of Langerhans and acts as a regulator of pancreatic and gastrointestinal functions.	6.7	11,464.4	CELL FUNCTION REGULATOR	11464.4
DOI: 10.1002./pmic.200300449	Carbonic anhydrase 2	Essential for bone resorption and osteoclast differentiation (By similarity). Reversible hydration of carbon dioxide. Can hydrate cyanamide to urea. Involved in the regulation of fluid secretion into the anterior chamber of the eye.	6.21	11,495.68	OSTEOGENESIS	11495.7
The Human Protein Atlas	Platelet factor 4	Released during platelet aggregation. Neutralizes the anticoagulant effect of heparin because it binds more strongly to heparin than to the chondroitin-4-sulfate chains of the carrier molecule. Chemotactic for neutrophils and monocytes. Inhibits endothelial cell proliferation, the short form is a more potent inhibitor than the longer form.	9.3	11,552.69	COAGULATION	11552.7
The Human Protein Atlas	Platelet factor 4 variant 1	Inhibitor of angiogenesis. Inhibitor of endothelial cell chemotaxis (in vitro).	9.3	11,552.69	INHIBITOR	11552.7
The Human Protein Atlas	Prokineticin 2	May function as an output molecule from the suprachiasmatic nucleus (SCN) that transmits behavioral circadian rhythm. May also function locally within the SCN to synchronize output. Potently contracts gastrointestinal (GI) smooth muscle.	9.19	11,659.17	MOTOR	11659.2
The Human Protein Atlas	Prokineticin 1	Potently contracts gastrointestinal (GI) smooth muscle. Induces proliferation, migration and fenestration (the formation of membrane discontinuities) in capillary endothelial cells derived from endocrine glands.	9.01	11,714.84	MOTOR	11714.8
The Human Protein Atlas	S100 calcium binding protein A4	Calcium-binding protein that plays a role in various cellular processes including motility, angiogenesis, cell differentiation, apoptosis, and autophagy. Increases cell motility and invasiveness by interacting with non-muscle myosin heavy chain (NMMHC) IIA/MYH9	5.57	11,728.52	ADHESION	11728.5
The Human Protein Atlas	Resistin like beta	Probable hormone.	7.44	11,729.68	HORMONE	11729.7
The Human Protein Atlas	TNF superfamily member 10	Cytokine that binds to TNFRSF10A/TRAILR1, TNFRSF10B/TRAILR2, TNFRSF10C/TRAILR3, TNFRSF10D/TRAILR4 and possibly also to TNFRSF11B/OPG 1, 2. Induces apoptosis.	8.37	11,745.74	CELL DEATH	11745.7
The Human Protein Atlas	Leukocyte cell derived chemotaxin 2	Has a neutrophil chemotactic activity. Also a positive regulator of chondrocyte proliferation. Does not show metalloendopeptidase activity	9.82	11,878.52	CELL FUNCTION REGULATOR	11878.5
The Human Protein Atlas	C-X-C motif chemokine ligand 6	It has strong antibacterial activity against Gram-positive and Gram-negative bacteria (90-fold-higher when compared to CXCL5 and CXCL7).	9.83	11,901.35	ANTIMICROBIAL	11901.4
The Human Protein Atlas	Serine protease 33	Serine protease that has amidolytic activity, cleaving its substrates before Arg residues.	11.88	11,949.86	IMMUNOLOGICAL	11949.9
The Human Protein Atlas	Vitelline membrane outer layer 1 homolog	UNSPECIFIC	4.76	11,966.49	UNSPECIFIC	11966.5
The Human Protein Atlas	Insulin	Insulin decreases blood glucose concentration. It increases cell permeability to monosaccharides, amino acids and fatty acids. It accelerates glycolysis, the pentose phosphate cycle, and glycogen synthesis in liver.	5.22	11,980.91	INHIBITOR	11980.9
DOI: 10.1002./pmic.200300449	Parvalbumin	In muscle, parvalbumin is thought to be involved in relaxation after contraction. It binds two calcium ions.	4.98	12,058.75	ADHESION	12058.8
The Human Protein Atlas	Guanylate cyclase activator 2B	Endogenous activator of intestinal guanylate cyclase. It stimulates this enzyme through the same receptor binding region as the heat-stable enterotoxins. May be a potent physiological regulator of intestinal fluid and electrolyte transport.	6.02	12,069.07	ACTIVATOR	12069.1
The Human Protein Atlas	Urocortin 2	Suppresses food intake, delays gastric emptying and decreases heat-induced edema. Might represent an endogenous ligand for maintaining homeostasis after stress.	11.58	12,146.30	INHIBITOR	12146.3
The Human Protein Atlas	Gonadotropin releasing hormone 2	Stimulates the secretion of gonadotropins; it stimulates the secretion of both luteinizing and follicle-stimulating hormones.	11.16	12,232.89	SECRETOR	12232.9
The Human Protein Atlas	C-C motif chemokine ligand 15	Chemotactic factor that attracts T-cells and monocytes, but not neutrophils, eosinophils, or B-cells. Acts mainly via CC chemokine receptor CCR1	8.49	12,236.42	RECEPTOR	12236.4
The Human Protein Atlas	Peptidase inhibitor 3	Neutrophil and pancreatic elastase-specific inhibitor of skin. It may prevent elastase-mediated tissue proteolysis. Has been shown to inhibit the alpha-4-beta-2/CHRNA2-CHRNB2 nicotinic acetylcholine receptor and to produce a weak inhibition on Kv11.1/KCNH2/ERG1 and on the transient receptor potential cation channel subfamily V member 1 (TRPV1)	9.14	12,269.61	INHIBITOR	12269.6
The Human Protein Atlas	Relaxin 3	May play a role in neuropeptide signaling processes. Ligand for LGR7, RXFP3 and RXFP4.	9.16	12,294.45	IMMUNOLOGICAL	12294.5
The Human Protein Atlas	Matrix Gla protein	Associates with the organic matrix of bone and cartilage. Thought to act as an inhibitor of bone formation.	9.71	12,353.19	INHIBITOR	12353.2
The Human Protein Atlas	Phospholipase A2 inhibitor and LY6/PLAUR domain containing	Secreted tyrosine-protein kinase that mediates phosphorylation of extracellular proteins and endogenous proteins in the secretory pathway, which is essential for patterning at organogenesis stages. Mediates phosphorylation of MMP1, MMP13, MMP14, MMP19 and ERP29	7.01	12,429.34	SECRETOR	12429.3
The Human Protein Atlas	Macrophage migration inhibitory factor	Pro-inflammatory cytokine. Involved in the innate immune response to bacterial pathogens. The expression of MIF at sites of inflammation suggests a role as mediator in regulating the function of macrophages in host defense.	7.73	12476.3	IMMUNOLOGICAL	12476.3
The Human Protein Atlas	Neural EGFL like 2	Required for neuron survival through the modulation of MAPK pathways (By similarity). Involved in the regulation of hypothalamic GNRH secretion and the control of puberty (By similarity).	8.01	12,493.42	SIGNAL	12493.4
The Human Protein Atlas	X-C motif chemokine ligand 1	Chemotactic activity for lymphocytes but not for monocytes or neutrophils. In thymus, mediates medullary accumulation of thymic dendritic cells and contributes to regulatoy T cell development, playing a role in self-tolerance establishment.	10.22	12502.6	CELL FUNCTION REGULATOR	12502.6
UNIPROT	Nucleobindin-1	Major calcium-binding protein of the Golgi which may have a role in calcium homeostasis (By similarity). Acts as a non-receptor guanine nucleotide exchange factor which binds to and activates alpha subunits of guanine nucleotide-binding proteins (G proteins) (By similarity)	6.06	12535.4	CARRIER	12535.4
The Human Protein Atlas	Galanin and GMAP prepropeptide	Endocrine hormone of the central and peripheral nervous systems that binds and activates the G protein-coupled receptors GALR1, GALR2, and GALR3. This small neuropeptide may regulate diverse physiologic functions including contraction of smooth muscle of the gastrointestinal and genitourinary tract, growth hormone and insulin release and adrenal secretion.	5.86	12544.7	HORMONE	12544.7
The Human Protein Atlas	X-C motif chemokine ligand 2	Chemotactic activity for lymphocytes but not for monocytes or neutrophils.	10.62	12,566.67	IMMUNOLOGICAL	12566.7
The Human Protein Atlas	C-C motif chemokine ligand 27	Chemotactic factor that attracts skin-associated memory T-lymphocytes. May play a role in mediating homing of lymphocytes to cutaneous sites. Binds to CCR10.	8.95	12,617.92	IMMUNOLOGICAL	12617.9
The Human Protein Atlas	C-X-C motif chemokine ligand 13	Chemotactic for B-lymphocytes but not for T-lymphocytes, monocytes and neutrophils. Does not induce calcium release in B-lymphocytes.	10.35	12,664.26	IMMUNOLOGICAL	12664.3
The Human Protein Atlas	Cholecystokinin	This peptide hormone induces gall bladder contraction and the release of pancreatic enzymes in the gut. Its function in the brain is not clear.	9.18	12,669.39	HORMONE	12669.4
The Human Protein Atlas	Granzyme H	Probably necessary for target cell lysis in cell-mediated immune responses. Participates in the antiviral response via direct cleavage of several proteins essential for viral replication.	9.96	12,678	IMMUNOLOGICAL	12678
The Human Protein Atlas	Oxytocin/neurophysin I prepropeptide	Neurophysin 1 specifically binds oxytocin.	5.72	12,721.69	MOTOR	12721.7
The Human Protein Atlas	Somatostatin	[Somatostatin-14]: Inhibits the secretion of pituitary hormones, including that of growth hormone/somatotropin (GH1), PRL, ACTH, luteinizing hormone (LH) and TSH. Also impairs ghrelin- and GnRH-stimulated secretion of GH1 and LH; the inhibition of ghrelin-stimulated secretion of GH1 can be further increased by neuronostatin.	5.47	12,735.58	INHIBITOR	12735.6
UNIPROT	Cytochrome b	Component of the ubiquinol-cytochrome c reductase complex (complex III or cytochrome b-c1 complex) that is part of the mitochondrial respiratory chain. The b-c1 complex mediates electron transfer from ubiquinol to cytochrome c. Contributes to the generation of a proton gradient across the mitochondrial membrane that is then used for ATP synthesis.	9.63	12743.6	CELL FUNCTION REGULATOR	12743.6
The Human Protein Atlas	C1q and TNF related 6	Tumor necrosis factor-related protein	9.29	12,826.92	IMMUNOLOGICAL	12826.9
The Human Protein Atlas	CART prepropeptide	Satiety factor closely associated with the actions of leptin and neuropeptide Y; this anorectic peptide inhibits both normal and starvation-induced feeding and completely blocks the feeding response induced by neuropeptide Y and regulated by leptin in the hypothalamus.	8.55	12,829.15	INHIBITOR	12829.1
DOI: 10.1002./pmic.200300449	Parathyroid hormone	PTH elevates calcium level by dissolving the salts in bone and preventing their renal excretion. Stimulates [1-14C]-2-deoxy-D-glucose (2DG) transport and glycogen synthesis in osteoblastic cells.	9.72	12,861.08	CELL FUNCTION REGULATOR	12861.1
The Human Protein Atlas	Cysteine rich secretory protein LCCL domain containing 2	Promotes matrix assembly.	5.35	12,871.48	CELLULAR ORGANIZATION	12871.5
The Human Protein Atlas	Chemokine like factor	May play an important role in inflammation and regeneration of skeletal muscle. Partly inhibited by interleukin 10.	9.36	12,887.74	INFLAMMATORY	12887.7
The Human Protein Atlas	Ghrelin and obestatin prepropeptide	Ghrelin is the ligand for growth hormone secretagogue receptor type 1 (GHSR). Induces the release of growth hormone from the pituitary.	5.35	12,910.74	CELL CYCLE	12910.7
The Human Protein Atlas	Glycoprotein hormone subunit alpha 2	Functions as a heterodimeric glycoprotein hormone with GPHB5 able to bind and activate the thyroid-stimulating hormone receptor (TSHR), leading to increased cAMP production 1. Plays a central role in controlling thyroid cell metabolism	9.54	12,910.85	METABOLIC	12910.9
The Human Protein Atlas	Motilin	Plays an important role in the regulation of interdigestive gastrointestinal motility and indirectly causes rhythmic contraction of duodenal and colonic smooth muscle.	6.14	12,919.97	MOTOR	12920
UNIPROT	Beta-1,4 N-acetylgalactosaminyltransferase 2	Involved in the synthesis of the Sd(a) antigen (Sia-alpha2,3-[GalNAc-beta1,4]Gal-beta1,4-GlcNAc), a carbohydrate determinant expressed on erythrocytes, the colonic mucosa and other tissues. Transfers a beta-1,4-linked GalNAc to the galactose residue of an alpha-2,3-sialylated chain.	9.75	12943	ENZYME	12943
The Human Protein Atlas	Secretin	Hormone involved in different processes, such as regulation of the pH of the duodenal content, food intake and water homeostasis	11.27	13,016.11	HORMONE	13016.1
The Human Protein Atlas	C-X-C motif chemokine ligand 14	Potent chemoattractant for neutrophils, and weaker for dendritic cells.	10.1	13,077.61	IMMUNOLOGICAL	13077.6
The Human Protein Atlas	Complement component 4 binding protein alpha	Controls the classical pathway of complement activation. It binds as a cofactor to C3b/C4b inactivator (C3bINA), which then hydrolyzes the complement fragment C4b.	9.23	13,092.27	IMMUNOLOGICAL	13092.3
The Human Protein Atlas	C-C motif chemokine ligand 24	Chemotactic for resting T-lymphocytes, and eosinophils . Has lower chemotactic activity for neutrophils but none for monocytes and activated lymphocytes	10	13,133.53	IMMUNOLOGICAL	13133.5
DOI: 10.1002./pmic.200300449	Complement component C10	Constituent of the membrane attack complex (MAC) that plays a key role in the innate and adaptive immune response by forming pores in the plasma membrane of target cells	5.04	13,178.15	IMMUNOLOGICAL	13178.1
UNIPROT	Protein S100-A9	S100A9 is a calcium- and zinc-binding protein which plays a prominent role in the regulation of inflammatory processes and immune response 1, 2, 3, 4, 5, 6, 7. It can induce neutrophil chemotaxis, adhesion, can increase the bactericidal activity of neutrophils by promoting phagocytosis via activation of SYK, PI3K/AKT, and ERK1/2 and can induce degranulation of neutrophils by a MAPK-dependent mech…	5.71	13242	INFLAMMATORY	13242
The Human Protein Atlas	S100 calcium binding protein A9	S100A9 is a calcium- and zinc-binding protein which plays a prominent role in the regulation of inflammatory processes and immune response	5.71	13,241.99	ADHESION	13242
The Human Protein Atlas	Natriuretic peptide C	[CNP-22]: Hormone which plays a role in endochondral ossification through regulation of cartilaginous growth plate chondrocytes proliferation and differentiation (By similarity). May also be vasoactive and natriuretic 1. Acts by specifically binding and stimulating NPR2 to produce cGMP	10.25	13,246.44	COAGULATION	13246.4
The Human Protein Atlas	Neuromedin B	Stimulates smooth muscle contraction in a manner similar to that of bombesin.	9.51	13,255.64	MOTOR	13255.6
The Human Protein Atlas	Interleukin 16	Interleukin-16 stimulates a migratory response in CD4+ lymphocytes, monocytes, and eosinophils. Primes CD4+ T-cells for IL-2 and IL-15 responsiveness. Also induces T-lymphocyte expression of interleukin 2 receptor. Ligand for CD4.	4.77	13,382.96	IMMUNOLOGICAL	13383
The Human Protein Atlas	Urocortin	Acts in vitro to stimulate the secretion of adrenocorticotropic hormone (ACTH) 1. Binds with high affinity to CRF receptor types 1, 2-alpha, and 2-beta 2. Plays a role in the establishment of normal hearing thresholds (By similarity). Reduces food intake and regulates ghrelin levels in gastric body and plasma (By similarity).	11.7	13,458.48	SECRETOR	13458.5
The Human Protein Atlas	Serum amyloid A2	Major acute phase protein.	8.82	13,508.05	METABOLIC	13508
UNIPROT	Period circadian protein homolog 1	Transcriptional repressor which forms a core component of the circadian clock. The circadian clock, an internal time-keeping system, regulates various physiological processes through the generation of approximately 24 hour circadian rhythms in gene expression, which are translated into rhythms in metabolism and behavior. It is derived from the Latin roots 'circa' (about) and 'diem' (day) and acts…	5.73	13518.3	CELL FUNCTION REGULATOR	13518.3
The Human Protein Atlas	Serum amyloid A1	Major acute phase protein.	6.28	13,532.02	INFLAMMATORY	13532
DOI: 10.1002./pmic.200300449	Serum amyloid protein α-1	Acute phase major protein	6.28	13,546.05	INFLAMMATORY	13546
UNIPROT	Dipeptidyl peptidase 4	Cell surface glycoprotein receptor involved in the costimulatory signal essential for T-cell receptor (TCR)-mediated T-cell activation 1, 2, 3, 4. Acts as a positive regulator of T-cell coactivation, by binding at least ADA, CAV1, IGF2R, and PTPRC 5, 6, 7, 8. Its binding to CAV1 and CARD11 induces T-cell proliferation and NF-kappa-B activation in a T-cell receptor/CD3-dependent manner 9. Its inte…	9.01	13630	RECEPTOR	13630
The Human Protein Atlas	Interleukin 1 receptor type 1	Receptor for IL1A, IL1B and IL1RN. After binding to interleukin-1 associates with the coreceptor IL1RAP to form the high affinity interleukin-1 receptor complex which mediates interleukin-1-dependent activation of NF-kappa-B, MAPK and other pathways.	7.68	13,652.85	RECEPTOR	13652.9
The Human Protein Atlas	Coiled-coil domain containing 134	In extracellular secreted form, promotes proliferation and activation of CD8(+) T cells, suggesting a cytokine-like function	9.99	13,667.18	ACTIVATOR	13667.2
The Human Protein Atlas	Beta-2-microglobulin	Component of the class I major histocompatibility complex (MHC). Involved in the presentation of peptide antigens to the immune system.	6.06	13,731.55	BIOMARKER	13731.5
UNIPROT	Tax1-binding protein 3	May regulate a number of protein-protein interactions by competing for PDZ domain binding sites. Binds CTNNB1 and may thereby act as an inhibitor of the Wnt signaling pathway. Competes with LIN7A for KCNJ4 binding, and thereby promotes KCNJ4 internalization. May play a role in the Rho signaling pathway. May play a role in activation of CDC42 by the viral protein HPV16 E6	8.05	13734.7	INHIBITOR	13734.7
The Human Protein Atlas	Kallikrein related peptidase 15	Protease whose physiological substrate is not yet known.	9.73	13,835.91	ENZYME	13835.9
The Human Protein Atlas	Chromosome 1 open reading frame 54	UNSPECIFIC	4.1	13,891.36	UNSPECIFIC	13891.4
The Human Protein Atlas	Pro-platelet basic protein	LA-PF4 stimulates DNA synthesis, mitosis, glycolysis, intracellular cAMP accumulation, prostaglandin E2 secretion, and synthesis of hyaluronic acid and sulfated glycosaminoglycan.	9.04	13,894.22	CELL CYCLE	13894.2
The Human Protein Atlas	C-X-C motif chemokine ligand 9	Cytokine that affects the growth, movement, or activation state of cells that participate in immune and inflammatory response.	10.39	14,018.78	IMMUNOLOGICAL	14018.8
UNIPROT	B-cell antigen receptor complex-associated protein beta chain	Required in cooperation with CD79A for initiation of the signal transduction cascade activated by the B-cell antigen receptor complex (BCR) which leads to internalization of the complex, trafficking to late endosomes and antigen presentation. Enhances phosphorylation of CD79A, possibly by recruiting kinases which phosphorylate CD79A or by recruiting proteins which bind to CD79A and protect it fro…	4.94	14030.2	CELL FUNCTION REGULATOR	14030.2
The Human Protein Atlas	Fc fragment of IgM receptor	May play a role in the immune system processes. Protects cells from FAS-, TNF alpha- and FADD-induced apoptosis without increasing expression of the inhibitors of apoptosis BCL2 and BCLXL.	9.08	14,055.59	ADHESION	14055.6
The Human Protein Atlas	Fibroblast activation protein alpha	Cell surface glycoprotein serine protease that participates in extracellular matrix degradation and involved in many cellular processes including tissue remodeling, fibrosis, wound healing, inflammation and tumor growth.	7.8	14,224.94	INFLAMMATORY	14224.9
The Human Protein Atlas	Glycoprotein hormone subunit alpha 5	Functions as a heterodimeric glycoprotein hormone with GPHA2 able to bind and activate the thyroid-stimulating hormone receptor (TSHR), leading to increased cAMP production. Plays a central role in controlling thyroid cell metabolism.	8	14,231.66	METABOLIC	14231.7
The Human Protein Atlas	Interleukin 13	Cytokine 27". Inhibits inflammatory cytokine production . Synergizes with IL2 in regulating interferon-gamma synthesis. May be critical in regulating inflammatory and immune responses	8.95	14,275.82	INHIBITOR	14275.8
The Human Protein Atlas	Secretory leukocyte peptidase inhibitor	Acid-stable proteinase inhibitor with strong affinities for trypsin, chymotrypsin, elastase, and cathepsin G. Modulates the inflammatory and immune responses after bacterial infection, and after infection by the intracellular parasite L.major.	9.11	14,326.09	ANTIMICROBIAL	14326.1
The Human Protein Atlas	Insulin like growth factor binding protein acid labile subunit	Involved in protein-protein interactions that result in protein complexes, receptor-ligand binding or cell adhesion.	11.2	14,433.39	ADHESION	14433.4
The Human Protein Atlas	TNF superfamily member 12	Binds to FN14 and possibly also to TNRFSF12/APO3. Weak inducer of apoptosis in some cell types. Mediates NF-kappa-B activation. Promotes angiogenesis and the proliferation of endothelial cells. Also involved in induction of inflammatory cytokines. Promotes IL8 secretion.	10	14,438.37	ACTIVATOR	14438.4
The Human Protein Atlas	Agouti signaling protein	Involved in the regulation of melanogenesis.	9.78	14,484.12	CELL FUNCTION REGULATOR	14484.1
The Human Protein Atlas	MIA SH3 domain containing	Elicits growth inhibition on melanoma cells in vitro as well as some other neuroectodermal tumors, including gliomas.	9.01	14,508.88	INHIBITOR	14508.9
The Human Protein Atlas	Follicle stimulating hormone subunit beta	Together with the alpha chain CGA constitutes follitropin, the follicle-stimulating hormone, and provides its biological specificity to the hormone heterodimer. Binds FSHR, a G protein-coupled receptor, on target cells to activate downstream signaling pathways 1, 2. Follitropin is involved in follicle development and spermatogenesis in reproductive organs	6.77	14700	HORMONE	14700
DOI: 10.1002./pmic.200300449	Follitropin β chain	Is involved in follicle development and spermatogenesis in reproductive organs	6.77	14,699.99	CELL CYCLE	14700
UNIPROT	Dysferlin	Key calcium ion sensor involved in the Ca(2+)-triggered synaptic vesicle-plasma membrane fusion. Plays a role in the sarcolemma repair mechanism of both skeletal muscle and cardiomyocytes that permits rapid resealing of membranes disrupted by mechanical stress (By similarity).	4.92	14702.4	REPAIRING	14702.4
The Human Protein Atlas	Galectin 1	Lectin that binds beta-galactoside and a wide array of complex carbohydrates. Plays a role in regulating apoptosis, cell proliferation and cell differentiation. Inhibits CD45 protein phosphatase activity and therefore the dephosphorylation of Lyn kinase. Strong inducer of T-cell apoptosis.	5.3	14,715.7	CELL DEATH	14715.7
The Human Protein Atlas	Leukocyte associated immunoglobulin like receptor 2	The protein encoded by this gene is a member of the immunoglobulin superfamily. It was identified by its similarity to leukocyte-associated immunoglobulin-like receptor 1, a membrane-bound receptor that modulates innate immune response. The protein encoded by this locus is a soluble receptor that may play roles in both inhibition of collagen-induced platelet aggregation and vessel formation durin…	5.9	14,721.66	IMMUNOLOGICAL	14721.7
The Human Protein Atlas	Natriuretic peptide B	[Brain natriuretic peptide 32]: Cardiac hormone that plays a key role in mediating cardio-renal homeostasis	10.34	14,725.94	COAGULATION	14725.9
DOI: 10.1002./pmic.200300449	Serum amyloid A protein	This protein is an important acute phase protein that is highly expressed in response to inflammation and tissue injury. T	9.27	14806.69	INFLAMMATORY	14806.7
DOI: 10.1002./pmic.200300449	Dimethylaniline monooxygenase 2	Catalyzes the N-oxidation of certain primary alkylamines to their oximes via an N-hydroxylamine intermediate. Inactive toward certain tertiary amines, such as imipramine or chloropromazine. Can catalyze the S-oxidation of methimazole.	6.57	14,825.03	CATALYTIC ACTIVITY	14825
The Human Protein Atlas	Granulysin	Antimicrobial protein that kills intracellular pathogens. Active against a broad range of microbes, including Gram-positive and Gram-negative bacteria, fungi, and parasites. Kills Mycobacterium tuberculosis.	9.25	14,853.06	ANTIMICROBIAL	14853.1
The Human Protein Atlas	Chymase 1	Major secreted protease of mast cells with suspected roles in vasoactive peptide generation, extracellular matrix degradation, and regulation of gland secretion.	9.97	14,893.34	CELL FUNCTION REGULATOR	14893.3
The Human Protein Atlas	Interleukin 36 gamma	Seems to be involved in skin inflammatory response by acting on keratinocytes, dendritic cells and indirectly on T-cells to drive tissue infiltration, cell maturation and cell proliferation. In cultured keratinocytes induces the expression of macrophage, T-cell, and neutrophil chemokines, such as CCL3, CCL4, CCL5, CCL2, CCL17, CCL22, CL20, CCL5, CCL2, CCL17, CCL22, CXCL8, CCL20 and CXCL1	4.94	14,927.99	INFLAMMATORY	14928
The Human Protein Atlas	Lymphocyte antigen 96	Binds bacterial lipopolysaccharide (LPS). Cooperates with TLR4 in the innate immune response to bacterial lipopolysaccharide (LPS), and with TLR2 in the response to cell wall components from Gram-positive and Gram-negative bacteria	8.19	14,933.19	IMMUNOLOGICAL	14933.2
The Human Protein Atlas	Tachykinin precursor 1	Tachykinins are active peptides which excite neurons, evoke behavioral responses, are potent vasodilators and secretagogues, and contract (directly or indirectly) many smooth muscles	8.89	15,003.14	MOTOR	15003.1
The Human Protein Atlas	Interleukin 22 receptor subunit alpha 2	Isoform 2 is a receptor for IL22. Binds to IL22, prevents interaction with the functional IL-22R complex and blocks the activity of IL22 (in vitro). May play an important role as an IL22 antagonist in the regulation of inflammatory responses.	9.04	15,128.04	ANTIMICROBIAL	15128
The Human Protein Atlas	Secreted phosphoprotein 2	Could coordinate an aspect of bone turnover.	7.71	15,143.82	OSTEOGENESIS	15143.8
The Human Protein Atlas	Interleukin 5	Factor that induces terminal differentiation of late-developing B-cells to immunoglobulin secreting cells.	7.81	15,237.82	CELL CYCLE	15237.8
UNIPROT	Hemoglobin subunit alpha	Involved in oxygen transport from the lung to the various peripheral tissues.	8.72	15257.5	CARRIER	15257.5
The Human Protein Atlas	Insulin like 5	May have a role in gut contractility or in thymic development and regulation. Activates RXFP4 with high potency and appears to be the endogenous ligand for this receptor.	6.81	15,318.51	ACTIVATOR	15318.5
The Human Protein Atlas	C-C motif chemokine ligand 23	Shows chemotactic activity for monocytes, resting T-lymphocytes, and neutrophils, but not for activated lymphocytes. Inhibits proliferation of myeloid progenitor cells in colony formation assays.	9.44	15322.1	INHIBITOR	15322.1
The Human Protein Atlas	Luteinizing hormone subunit beta	Promotes spermatogenesis and ovulation by stimulating the testes and ovaries to synthesize steroids.	8	15,345.28	CELLULAR ORGANIZATION	15345.3
The Human Protein Atlas	Growth factor, augmenter of liver regeneration	[Isoform 1]: FAD-dependent sulfhydryl oxidase that regenerates the redox-active disulfide bonds in CHCHD4/MIA40, a chaperone essential for disulfide bond formation and protein folding in the mitochondrial intermembrane space.	6.05	15,396.3	CELLULAR ORGANIZATION	15396.3
The Human Protein Atlas	Insulin like 4	May play an important role in trophoblast development and in the regulation of bone formation.	9.28	15,445	INHIBITOR	15445
The Human Protein Atlas	Calcitonin related polypeptide alpha	Calcitonin causes a rapid but short-lived drop in the level of calcium and phosphate in blood by promoting the incorporation of those ions in the bones.	5.77	15,467.43	OSTEOGENESIS	15467.4
The Human Protein Atlas	C-X-C motif chemokine ligand 12	Chemoattractant active on T-lymphocytes and monocytes but not neutrophils. Activates the C-X-C chemokine receptor CXCR4 to induce a rapid and transient rise in the level of intracellular calcium ions and chemotaxis.	9.76	15,495.36	IMMUNOLOGICAL	15495.4
UNIPROT	Periostin	Induces cell attachment and spreading and plays a role in cell adhesion 1. Enhances incorporation of BMP1 in the fibronectin matrix of connective tissues, and subsequent proteolytic activation of lysyl oxidase LOX (By similarity)	5.62	15563	ADHESION	15563
The Human Protein Atlas	Midkine	Secreted protein that functions as cytokine and growth factor and mediates its signal through cell-surface proteoglycan and non-proteoglycan receptors	9.84	15,585.19	SECRETOR	15585.2
The Human Protein Atlas	Thyroid stimulating hormone subunit beta	Indispensable for the control of thyroid structure and metabolism.	7.92	15,609.31	MOTOR	15609.3
The Human Protein Atlas	Coiled-coil domain containing 126	UNSPECIFIC	9.87	15,668.19	UNSPECIFIC	15668.2
The Human Protein Atlas	Cystatin C	As an inhibitor of cysteine proteinases, this protein is thought to serve an important physiological role as a local regulator of this enzyme activity.	9	15,799.22	BIOMARKER	15799.2
The Human Protein Atlas	Adrenomedullin 2	May play a role as physiological regulators of gastrointestinal, cardiovascular bioactivities mediated by the CALCRL/RAMPs receptor complexes.	11.81	15,865.31	CELL FUNCTION REGULATOR	15865.3
DOI: 10.1002./pmic.200300449	Transthyretin	Thyroid hormone-binding protein. Probably transports thyroxine from the bloodstream to the brain.	5.49	15,887.03	CARRIER	15887
The Human Protein Atlas	Interleukin 9	Supports IL-2 independent and IL-4 independent growth of helper T-cells.	8.93	15,908.8	IMMUNOLOGICAL	15908.8
The Human Protein Atlas	Secreted and transmembrane 1	May be involved in thymocyte signaling.	7	15920.9	SIGNAL	15920.9
UNIPROT	Hemoglobin subunit beta	Involved in oxygen transport from the lung to the various peripheral tissues.	6.74	15998.4	CARRIER	15998.4
The Human Protein Atlas	Urotensin 2	Highly potent vasoconstrictor.	6.85	16,029.47	VASO-REGULATORY	16029.5
The Human Protein Atlas	V-set and transmembrane domain containing 1	[Isoform 2]: Behaves as a cytokine, promoting IL17A secretion by CD4+ T-cells, and differentiation and activation of IL17 producing helper T-cells (TH17).	5.67	16,047.98	IMMUNOLOGICAL	16048
The Human Protein Atlas	TIMP metallopeptidase inhibitor 1	Metalloproteinase inhibitor that functions by forming one to one complexes with target metalloproteinases, such as collagenases, and irreversibly inactivates them by binding to their catalytic zinc cofactor. Acts on MMP1, MMP2, MMP3, MMP7, MMP8, MMP9, MMP10, MMP11, MMP12, MMP13 and MMP16.	8.4	16,057.48	INHIBITOR	16057.5
The Human Protein Atlas	Phospholipase A2 group IIA	Secretory calcium-dependent phospholipase A2 that primarily targets extracellular phospholipids with implications in host antimicrobial defense, inflammatory response and tissue regeneration	9.44	16,082.67	STRUCTURAL	16082.7
The Human Protein Atlas	Colony stimulating factor 2	Cytokine that stimulates the growth and differentiation of hematopoietic precursor cells from various lineages, including granulocytes, macrophages, eosinophils and erythrocytes.	5.16	16,282.71	CELL CYCLE	16282.7
The Human Protein Atlas	Gremlin 1, DAN family BMP antagonist	Cytokine that may play an important role during carcinogenesis and metanephric kidney organogenesis, as a BMP antagonist required for early limb outgrowth and patterning in maintaining the FGF4-SHH feedback loop.	9.68	16,292.17	CELL FUNCTION REGULATOR	16292.2
The Human Protein Atlas	Complement factor H related 2	Involved in complement regulation. The dimerized forms have avidity for tissue-bound complement fragments and efficiently compete with the physiological complement inhibitor CFH.	6.7	16,398.77	CELL FUNCTION REGULATOR	16398.8
The Human Protein Atlas	Histidine rich glycoprotein	Plasma glycoprotein that binds a number of ligands such as heme, heparin, heparan sulfate, thrombospondin, plasminogen, and divalent metal ions. Binds heparin and heparin/glycosaminoglycans in a zinc-dependent manner. Binds heparan sulfate on the surface of liver, lung, kidney and heart endothelial cells. Binds to N-sulfated polysaccharide chains on the surface of liver endothelial cells. Inhibit…	9.66	16419.2	CELL FUNCTION REGULATOR	16419.2
The Human Protein Atlas	Azurocidin 1	. It may play a role in mediating recruitment of monocytes in the second wave of inflammation. Has antibacterial activity against the Gram-negative bacterium P.aeruginosa, this activity is inhibited by LPS from P.aeruginosa	9.42	16423.5	ANTIMICROBIAL	16423.5
The Human Protein Atlas	Lysozyme	Lysozymes have primarily a bacteriolytic function; those in tissues and body fluids are associated with the monocyte-macrophage system and enhance the activity of immunoagents.	5.01	16,429.74	CATALYTIC ACTIVITY	16429.7
The Human Protein Atlas	Angiogenin	Binds to actin on the surface of endothelial cells; once bound, angiogenin is endocytosed and translocated to the nucleus.	9.73	16,550.07	CELLULAR ORGANIZATION	16550.1
The Human Protein Atlas	Angiogenin	Binds to actin on the surface of endothelial cells; once bound, angiogenin is endocytosed and translocated to the nucleus.	9.73	16,550.07	CELLULAR ORGANIZATION	16550.1
The Human Protein Atlas	Chorionic gonadotropin subunit beta 1	UNSPECIFIC	9.03	16,665.54	UNSPECIFIC	16665.5
The Human Protein Atlas	Natriuretic peptide A	[Atrial natriuretic peptide]: Hormone that plays a key role in mediating cardio-renal homeostasis, and is involved in vascular remodeling and regulating energy metabolism	6.59	16,708	COAGULATION	16708
The Human Protein Atlas	Lymphocyte antigen 6 family member G5B	LY6G5B belongs to a cluster of leukocyte antigen-6 (LY6) genes located in the major histocompatibility complex (MHC) class III region on chromosome 6. Members of the LY6 superfamily typically contain 70 to 80 amino acids, including 8 to 10 cysteines. Most LY6 proteins are attached to the cell surface by a glycosylphosphatidylinositol (GPI) anchor that is directly involved in signal transduction	5.83	16,792.21	SIGNAL	16792.2
The Human Protein Atlas	Vanin 3	Amidohydrolase that hydrolyzes specifically one of the carboamide linkages in D-pantetheine thus recycling pantothenic acid (vitamin B5) and releasing cysteamine.	6.51	16,821.54	ENZYME	16821.5
The Human Protein Atlas	CutA divalent cation tolerance homolog	May form part of a complex of membrane proteins attached to acetylcholinesterase (AChE).	5.15	16,832.57	COAGULATION	16832.6
The Human Protein Atlas	Ribonuclease A family member 4	This RNase has marked specificity towards the 3' side of uridine nucleotides.	9.3	16,840.47	ANTIMICROBIAL	16840.5
The Human Protein Atlas	Coiled-coil domain containing 3	Negatively regulates TNF-alpha-induced pro-inflammatory response in endothelial cells (ECs) via inhibition of TNF-alpha-induced NF-kappaB activation in ECs	9.89	16,864.21	INHIBITOR	16864.2
The Human Protein Atlas	Insulin like 3	Seems to play a role in testicular function. May be a trophic hormone with a role in testicular descent in fetal life. Is a ligand for LGR8 receptor.	8.82	16,872.48	HORMONE	16872.5
The Human Protein Atlas	Interleukin 36 receptor antagonist	Inhibits the activity of interleukin-36 (IL36A,IL36B and IL36G) by binding to receptor IL1RL2 and preventing its association with the coreceptor IL1RAP for signaling. Part of the IL-36 signaling system that is thought to be present in epithelial barriers and to take part in local inflammatory response; similar to the IL-1 system with which it shares the coreceptor. Proposed to play a role in skin…	5.08	16962.5	INHIBITOR	16962.5
UNIPROT	Interleukin-36 receptor antagonist protein	Inhibits the activity of interleukin-36 (IL36A,IL36B and IL36G) by binding to receptor IL1RL2 and preventing its association with the coreceptor IL1RAP for signaling. Part of the IL-36 signaling system that is thought to be present in epithelial barriers and to take part in local inflammatory response; similar to the IL-1 system with which it shares the coreceptor. Proposed to play a role in skin…	5.08	16962.5	INHIBITOR	16962.5
The Human Protein Atlas	Interleukin 1 family member 10	Cytokine with immunomodulatory activity. Alone, does not induce cytokine production, but reduces IL22 and IL17A production by T-cells in response to heat-killed Candida albicans.	4.83	16,975.26	IMMUNOLOGICAL	16975.3
The Human Protein Atlas	Transforming growth factor alpha	TGF alpha is a mitogenic polypeptide that is able to bind to the EGF receptor/EGFR and to act synergistically with TGF beta to promote anchorage-independent cell proliferation in soft agar.	7.51	17,005.98	CELL CYCLE	17006
The Human Protein Atlas	TNF receptor superfamily member 1B	Receptor with high affinity for TNFSF2/TNF-alpha and approximately 5-fold lower affinity for homotrimeric TNFSF1/lymphotoxin-alpha. The TRAF1/TRAF2 complex recruits the apoptotic suppressors BIRC2 and BIRC3 to TNFRSF1B/TNFR2. This receptor mediates most of the metabolic effects of TNF-alpha.	7.36	17,015.42	RECEPTOR	17015.4
The Human Protein Atlas	Gastric inhibitory polypeptide	Potent stimulator of insulin secretion and relatively poor inhibitor of gastric acid secretion.	7.8	17,107.56	SECRETOR	17107.6
The Human Protein Atlas	Interleukin 20	Proinflammatory and angiogenic cytokine that may be involved in epidermal function and psoriasis. Angiogenic and proliferative activities are antagonized by IL10. May act through STAT3	9.13	17,143.97	INFLAMMATORY	17144
UNIPROT	Thiamine pyrophosphokinase 1	Catalyzes the phosphorylation of thiamine to thiamine pyrophosphate (TPP) utilizing UTP and therefore links the biosynthesis of TPP to pyrimidines metabolism 1. By producing thiamine pyrophosphate, a cofactor of the mitochondrial pyruvate dehydrogenase indirectly regulates pyruvate oxidation and lipogenesis 2. Although it can also catalyze thiamine phosphorylation using ATP and CTP in vitro, it d…	4.95	17163.6	CATALYTIC ACTIVITY	17163.6
The Human Protein Atlas	Ribonuclease A family member k6	Ribonuclease which shows a preference for the pyrimidines uridine and cytosine. Has potent antibacterial activity against a range of Gram-positive and Gram-negative bacteria, including P.aeruginosa, A.baumanii, M.luteus, S.aureus, E.faecalis, E.faecium, S.saprophyticus and E.coli	9.09	17,196.15	ANTIMICROBIAL	17196.2
The Human Protein Atlas	Interleukin 3	Granulocyte/macrophage colony-stimulating factors are cytokines that act in hematopoiesis by controlling the production, differentiation, and function of 2 related white cell populations of the blood, the granulocytes and the monocytes-macrophages.	8.69	17,233.11	IMMUNOLOGICAL	17233.1
The Human Protein Atlas	Interleukin 4	Participates in at least several B-cell activation processes as well as of other cell types	9.17	17,458.24	ANTI-INFLAMMATORY	17458.2
The Human Protein Atlas	Interleukin 17A	Plays an important role in connecting T cell-mediated adaptive immunity and acute inflammatory response to destroy extracellular bacteria and fungi.	8.82	17,504.07	IMMUNOLOGICAL	17504.1
The Human Protein Atlas	TNF superfamily member 13b	Cytokine that binds to TNFRSF13B/TACI and TNFRSF17/BCMA. TNFSF13/APRIL binds to the same 2 receptors. Together, they form a 2 ligands -2 receptors pathway involved in the stimulation of B- and T-cell function and the regulation of humoral immunity. A third B-cell specific BAFF-receptor (BAFFR/BR3) promotes the survival of mature B-cells and the B-cell response.	6.16	17,578.08	IMMUNOLOGICAL	17578.1
The Human Protein Atlas	Serglycin	Plays a role in formation of mast cell secretory granules and mediates storage of various compounds in secretory vesicles. Required for storage of some proteases in both connective tissue and mucosal mast cells and for storage of granzyme B in T-lymphocytes. Plays a role in localizing neutrophil elastase in azurophil granules of neutrophils.	4.71	17,623.74	ENZYME	17623.7
The Human Protein Atlas	Interleukin 2	Produced by T-cells in response to antigenic or mitogenic stimulation, this protein is required for T-cell proliferation and other activities crucial to regulation of the immune response. Can stimulate B-cells, monocytes, lymphokine-activated killer cells, natural killer cells, and glioma cells.	7.67	17,627.71	CELL CYCLE	17627.7
The Human Protein Atlas	Colony stimulating factor 3	Granulocyte/macrophage colony-stimulating factors are cytokines that act in hematopoiesis by controlling the production, differentiation, and function of 2 related white cell populations of the blood, the granulocytes and the monocytes-macrophages.	5.21	17,684.45	CELL FUNCTION REGULATOR	17684.5
The Human Protein Atlas	Interleukin 36 beta	Stimulates production of interleukin-6 and interleukin-8 in synovial fibrobasts, articular chondrocytes and mature adipocytes. Induces expression of a number of antimicrobial peptides including beta-defensins 4 and 103 as well as a number of matrix metalloproteases.	9.13	17702.4	CELLULAR ORGANIZATION	17702.4
The Human Protein Atlas	Chorionic gonadotropin subunit beta 3	Beta subunit of the human chorionic gonadotropin (hCG). hCG is a complex glycoprotein composed of two glycosylated subunits alpha and beta which are non-covalently associated.	8.49	17,738.72	CELLULAR ORGANIZATION	17738.7
The Human Protein Atlas	Chorionic gonadotropin subunit beta 5	Beta subunit of the human chorionic gonadotropin (hCG). hCG is a complex glycoprotein composed of two glycosylated subunits alpha and beta which are non-covalently associated.	8.49	17,738.72	CELLULAR ORGANIZATION	17738.7
UNIPROT	Plasma membrane ascorbate-dependent reductase CYBRD1	Plasma membrane reductase that uses cytoplasmic ascorbate as an electron donor to reduce extracellular Fe(3+) into Fe(2+) 1. Probably functions in dietary iron absorption at the brush border of duodenal enterocytes by producing Fe(2+), the divalent form of iron that can be transported into enterocytes 2. It is also able to reduce extracellular monodehydro-L-ascorbate and may be involved in extrac…	6.35	17903.5	ENZYME	17903.5
The Human Protein Atlas	ISG15 ubiquitin like modifier	Ubiquitin-like protein which plays a key role in the innate immune response to viral infection either via its conjugation to a target protein (ISGylation) or via its action as a free or unconjugated protein.	6.83	17,914.53	ANTIMICROBIAL	17914.5
The Human Protein Atlas	Lymphocyte antigen 86	May cooperate with CD180 and TLR4 to mediate the innate immune response to bacterial lipopolysaccharide (LPS) and cytokine production. Important for efficient CD180 cell surface expression (By similarity).	5.83	17,915.7	IMMUNOLOGICAL	17915.7
The Human Protein Atlas	Urocortin 3	Suppresses food intake, delays gastric emptying and decreases heat-induced edema. Might represent an endogenous ligand for maintaining homeostasis after stress.	10.41	17,960.85	INHIBITOR	17960.8
UNIPROT	B-cell CLL/lymphoma 7 protein family member B	Positive regulator of apoptosis. Plays a role in the Wnt signaling pathway, negatively regulating the expression of Wnt signaling components CTNNB1 and HMGA1 1. Involved in cell cycle progression, maintenance of the nuclear structure and stem cell differentiation 2. May play a role in lung tumor development or progression	5.03	17963.7	CELL FUNCTION REGULATOR	17963.7
The Human Protein Atlas	Peptidylprolyl isomerase A	Catalyzes the cis-trans isomerization of proline imidic peptide bonds in oligopeptides	7.68	18,012.49	CATALYTIC ACTIVITY	18012.5
The Human Protein Atlas	Neuropeptide W	Plays a regulatory role in the organization of neuroendocrine signals accessing the anterior pituitary gland. Stimulates water drinking and food intake. May play a role in the hypothalamic response to stress (By similarity). NPW23 activates GPR7 and GPR8 more efficiently than NPW30.	10.3	18,048.01	CELLULAR ORGANIZATION	18048
The Human Protein Atlas	Interleukin 17F	Effector cytokine of innate and adaptive immune system involved in antimicrobial host defense and maintenance of tissue integrity	9.3	18,064.01	IMMUNOLOGICAL	18064
The Human Protein Atlas	Interleukin 15	In neutrophils, stimulates phagocytosis probably by signaling through the IL15 receptor, composed of the subunits IL15RA, IL2RB and IL2RG, which results in kinase SYK activation	5.13	18085.85	IMMUNOLOGICAL	18085.8
The Human Protein Atlas	Joining chain of multimeric IgA and IgM	Serves to link two monomer units of either IgM or IgA. In the case of IgM, the J chain-joined dimer is a nucleating unit for the IgM pentamer, and in the case of IgA it induces dimers and/or larger polymers. It also helps to bind these immunoglobulins to secretory component.	4.99	18,098.59	ADHESION	18098.6
The Human Protein Atlas	Thymic stromal lymphopoietin	[Isoform 1]: Cytokine that induces the release of T-cell-attracting chemokines from monocytes and, in particular, enhances the maturation of CD11c(+) dendritic cells. Can induce allergic inflammation by directly activating mast cells.	9.75	18,141.30	IMMUNOLOGICAL	18141.3
The Human Protein Atlas	Interleukin 31	Activates STAT3 and possibly STAT1 and STAT5 through the IL31 heterodimeric receptor composed of IL31RA and OSMR 1. May function in skin immunity 2. Enhances myeloid progenitor cell survival in vitro (By similarity). Induces RETNLA and serum amyloid A protein expression in macrophages (By similarity).	5.28	18,204.89	IMMUNOLOGICAL	18204.9
The Human Protein Atlas	High mobility group box 1	Multifunctional protein with various roles in different cellular compartments. May act in a redox sensitive manner.	9.72	18,311.15	INFLAMMATORY	18311.2
DOI: 10.1002./pmic.200300449	Complement factor I	Trypsin-like serine protease that plays an essential role in regulating the immune response by controlling all complement pathways.	8.71	18,340.42	CELL FUNCTION REGULATOR	18340.4
The Human Protein Atlas	Sphingomyelin phosphodiesterase 1	Converts sphingomyelin to ceramide. Exists as two enzymatic forms that arise from alternative trafficking of a single protein precursor, one that is targeted to the endolysosomal compartment, whereas the other is released extracellularly	9.07	18,349.55	CATALYTIC ACTIVITY	18349.5
The Human Protein Atlas	Ribonuclease A family member 2	This is a non-secretory ribonuclease. It is a pyrimidine specific nuclease with a slight preference for U. Cytotoxin and helminthotoxin. Selectively chemotactic for dendritic cells. Possesses a wide variety of biological activities.	9.1	18,354.18	ANTIMICROBIAL	18354.2
UNIPROT	Solute carrier family 40 member	Transports Fe(2+) from the inside of a cell to the outside of the cell, playing a key role for maintaining systemic iron homeostasis 1, 2, 3, 4, 5, 6, 7. Transports iron from intestinal, splenic, hepatic cells, macrophages and erythrocytes into the blood to provide iron to other tissues (By similarity). Controls therefore dietary iron uptake, iron recycling by macrophages and erythrocytes, and re…	6.58	18359	CARRIER	18359
The Human Protein Atlas	Ribonuclease A family member 3	Cytotoxin and helminthotoxin with low-efficiency ribonuclease activity. Possesses a wide variety of biological activities. Exhibits antibacterial activity, including cytoplasmic membrane depolarization of preferentially Gram-negative, but also Gram-positive strains. Promotes E.coli outer membrane detachment, alteration of the overall cell shape and partial loss of cell content.	10.12	18,385.32	ANTIMICROBIAL	18385.3
The Human Protein Atlas	TNF receptor superfamily member 18	Receptor for TNFSF18. Seems to be involved in interactions between activated T-lymphocytes and endothelial cells and in the regulation of T-cell receptor-mediated cell death. Mediated NF-kappa-B activation via the TRAF2/NIK pathway.	5.35	18,485.08	RECEPTOR	18485.1
The Human Protein Atlas	Interleukin 25	Induces activation of NF-kappa-B and stimulates production of the proinflammatory chemokine IL-8. Proinflammatory cytokine favoring Th2-type immune responses.	8.73	18,523.18	IMMUNOLOGICAL	18523.2
The Human Protein Atlas	Chorionic somatomammotropin hormone like 1	May be a novel gestational hormone required to compensate for absence of other members of the GH/CS cluster during gestation.	4.93	18,572.92	HORMONE	18572.9
The Human Protein Atlas	Retinoic acid receptor responder 2	Adipocyte-secreted protein (adipokine) that regulates adipogenesis, metabolism and inflammation through activation of the chemokine-like receptor 1 (CMKLR1).	9.3	18,617.58	INFLAMMATORY	18617.6
UNIPROT	NADH-ubiquinone oxidoreductase chain 6	UNSPECIFIC	4.18	18622.1	UNSPECIFIC	18622.1
The Human Protein Atlas	Leptin	Key player in the regulation of energy balance and body weight control.	5.88	18,640.57	CELL FUNCTION REGULATOR	18640.6
The Human Protein Atlas	Interleukin 21	Cytokine with immunoregulatory activity. May promote the transition between innate and adaptive immunity. Induces the production of IgG(1) and IgG(3) in B-cells (By similarity). Implicated in the generation and maintenance of T follicular helper (Tfh) cells and the formation of germinal-centers.	9.54	18,652.51	IMMUNOLOGICAL	18652.5
The Human Protein Atlas	Pro-melanin concentrating hormone	MCH may act as a neurotransmitter or neuromodulator in a broad array of neuronal functions directed toward the regulation of goal-directed behavior, such as food intake, and general arousal. May also have a role in spermatocyte differentiation.	6.74	18,679.24	SIGNAL	18679.2
The Human Protein Atlas	Complement C8 gamma chain	C8 is a constituent of the membrane attack complex. C8 binds to the C5B-7 complex, forming the C5B-8 complex. C5-B8 binds C9 and acts as a catalyst in the polymerization of C9. The gamma subunit seems to be able to bind retinol.	8.95	18823.8	CATALYTIC ACTIVITY	18823.8
The Human Protein Atlas	Neudesin neurotrophic factor	Acts as a neurotrophic factor in postnatal mature neurons enhancing neuronal survival	5.51	18,856.4	SIGNAL	18856.4
The Human Protein Atlas	Pleiotrophin	Secreted growth factor that mediates its signal through cell-surface proteoglycan and non-proteoglycan receptors . Binds cell-surface proteoglycan receptor via their chondroitin sulfate (CS) groups	9.66	18,942	CELL CYCLE	18942
The Human Protein Atlas	Interferon alpha and beta receptor subunit 2	Associates with IFNAR1 to form the plasma membrane receptor in the type I interferon signaling pathway. Directly involved in signal transduction through its association with the TYR kinase JAK1	4.75	18,961.49	RECEPTOR	18961.5
The Human Protein Atlas	Vascular endothelial growth factor A	Growth factor active in angiogenesis, vasculogenesis and endothelial cell growth. Induces endothelial cell proliferation, promotes cell migration, inhibits apoptosis and induces permeabilization of blood vessels. Binds to the FLT1/VEGFR1 and KDR/VEGFR2 receptors, heparan sulfate and heparin.	7.46	18,997.71	CELL CYCLE	18997.7
The Human Protein Atlas	Epiregulin	Ligand of the EGF receptor/EGFR and ERBB4. Stimulates EGFR and ERBB4 tyrosine phosphorylation. Contributes to inflammation, wound healing, tissue repair, and oocyte maturation by regulating angiogenesis and vascular remodeling and by stimulating cell proliferation	7.49	19,044.17	INFLAMMATORY	19044.2
UNIPROT	Retinol-binding protein 4	Retinol-binding protein that mediates retinol transport in blood plasma 1. Delivers retinol from the liver stores to the peripheral tissues (Probable). Transfers the bound all-trans retinol to STRA6, that then facilitates retinol transport across the cell membrane 2.	5.76	19080	CARRIER	19080
The Human Protein Atlas	Vasoactive intestinal peptide	VIP causes vasodilation, lowers arterial blood pressure, stimulates myocardial contractility, increases glycogenolysis and relaxes the smooth muscle of trachea, stomach and gall bladder.	5.92	19,081.58	VASO-REGULATORY	19081.6
The Human Protein Atlas	NPC intracellular cholesterol transporter 2	Intracellular cholesterol transporter which acts in concert with NPC1 and plays an important role in the egress of cholesterol from the lysosomal compartment	8.73	19,230.16	ADHESION	19230.2
The Human Protein Atlas	Gremlin 2, DAN family BMP antagonist	Cytokine that inhibits the activity of BMP2 and BMP4 in a dose-dependent manner, and thereby modulates signaling by BMP family members.	9.36	19,320.35	INHIBITOR	19320.3
The Human Protein Atlas	Interferon gamma	Type II interferon produced by immune cells such as T-cells and NK cells that plays crucial roles in antimicrobial, antiviral, and antitumor responses by activating effector immune cells and enhancing antigen presentation	9.5	19,348.3	ANTIMICROBIAL	19348.3
The Human Protein Atlas	Hyaluronidase 1	May have a role in promoting tumor progression. May block the TGFB1-enhanced cell growth.	6.5	19,367.24	INHIBITOR	19367.2
The Human Protein Atlas	Cathelicidin antimicrobial peptide	Binds to bacterial lipopolysaccharides (LPS), has antibacterial activity.	9.48	19,590.73	ANTIMICROBIAL	19590.7
The Human Protein Atlas	Interleukin 26	May play a role in local mechanisms of mucosal immunity and seems to have a proinflammatory function. May play a role in inflammatory bowel disease. Activates STAT1 and STAT3, MAPK1/3 (ERK1/2), JUN and AKT. Induces expression of SOCS3, TNF-alpha and IL-8, secretion of IL-8 and IL-10 and surface expression of ICAM1. Decreases proliferation of intestinal epithelial cells. Is inhibited by heparin.	10	19711.5	INFLAMMATORY	19711.5
The Human Protein Atlas	Glycosylphosphatidylinositol specific phospholipase D1	This protein hydrolyzes the inositol phosphate linkage in proteins anchored by phosphatidylinositol glycans (GPI-anchor) thus releasing these proteins from the membrane.	6.07	19,878.68	ENZYME	19878.7
The Human Protein Atlas	Interleukin 1 receptor antagonist	Inhibits the activity of interleukin-1 by binding to receptor IL1R1 and preventing its association with the coreceptor IL1RAP for signaling.	5.82	20,054.99	INHIBITOR	20055
The Human Protein Atlas	Endothelial cell specific molecule 1	Involved in angiogenesis; promotes angiogenic sprouting. May have potent implications in lung endothelial cell-leukocyte interactions.	7.36	20,094.92	CELL CYCLE	20094.9
The Human Protein Atlas	TNF superfamily member 15	Receptor for TNFRSF25 and TNFRSF6B. Mediates activation of NF-kappa-B. Inhibits vascular endothelial growth and angiogenesis (in vitro). Promotes activation of caspases and apoptosis.	8.85	20,131.34	RECEPTOR	20131.3
The Human Protein Atlas	Complement C1q binding protein	Is believed to be a multifunctional and multicompartmental protein involved in inflammation and infection processes, ribosome biogenesis, protein synthesis in mitochondria, regulation of apoptosis, transcriptional regulation and pre-mRNA splicing.	4.1	20,133.98	INFLAMMATORY	20134
The Human Protein Atlas	Insulin like growth factor 2	The insulin-like growth factors possess growth-promoting activity (By similarity). Major fetal growth hormone in mammals. Plays a key role in regulating fetoplacental development.	9.5	20,140.35	CELL FUNCTION REGULATOR	20140.3
The Human Protein Atlas	Interleukin 7	Hematopoietic growth factor capable of stimulating the proliferation of lymphoid progenitors. It is important for proliferation during certain stages of B-cell maturation.	8.85	20,186.64	CELL FUNCTION REGULATOR	20186.6
UNIPROT	Bcl-2-related protein A1	Retards apoptosis induced by IL-3 deprivation. May function in the response of hemopoietic cells to external signals and in maintaining endothelial survival during infection (By similarity). Can inhibit apoptosis induced by serum starvation in the mammary epithelial cell line HC11	5.34	20264.4	INHIBITOR	20264.4
The Human Protein Atlas	Insulin like growth factor binding protein 2	Inhibits IGF-mediated growth and developmental rates. IGF-binding proteins prolong the half-life of the IGFs and have been shown to either inhibit or stimulate the growth promoting effects of the IGFs on cell culture. They alter the interaction of IGFs with their cell surface receptors.	8.17	20,281.05	INHIBITOR	20281
The Human Protein Atlas	Prepronociceptin	[Nociceptin]: Ligand of the opioid receptor-like receptor OPRL1. It may act as a transmitter in the brain by modulating nociceptive and locomotor behavior. May be involved in neuronal differentiation and development.	8.68	20,295.45	CELL FUNCTION REGULATOR	20295.5
The Human Protein Atlas	Matrix metallopeptidase 25	May activate progelatinase A.	5.68	20,353.81	ACTIVATOR	20353.8
The Human Protein Atlas	Myeloid derived growth factor	Bone marrow-derived monocyte and paracrine-acting protein that promotes cardiac myocyte survival and adaptive angiogenesis for cardiac protection and/or repair after myocardial infarction (MI).	5.19	20,387.68	INHIBITOR	20387.7
The Human Protein Atlas	Complement C1r subcomponent like	Mediates the proteolytic cleavage of HP/haptoglobin in the endoplasmic reticulum.	7.62	20,391.03	CELL DEATH	20391
The Human Protein Atlas	Adrenomedullin	AM and PAMP are potent hypotensive and vasodilatator agents.	10.84	20,420.38	VASO-REGULATORY	20420.4
The Human Protein Atlas	Interleukin 17B	Stimulates the release of tumor necrosis factor alpha and IL-1-beta from the monocytic cell line THP-1.	9.46	20,436.91	IMMUNOLOGICAL	20436.9
UNIPROT	Lactotransferrin	Transferrins are iron binding transport proteins which can bind two Fe(3+) ions in association with the binding of an anion, usually bicarbonate.	10.1	20500	CARRIER	20500
The Human Protein Atlas	Interleukin 10	Major immune regulatory cytokine that acts on many cells of the immune system where it has profound anti-inflammatory functions, limiting excessive tissue disruption caused by inflammation.	8.19	20,516.76	IMMUNOLOGICAL	20516.8
The Human Protein Atlas	Mesencephalic astrocyte derived neurotrophic factor	Selectively promotes the survival of dopaminergic neurons of the ventral mid-brain	8.94	20,700.13	SIGNAL	20700.1
The Human Protein Atlas	Interleukin 23 subunit alpha	Associates with IL12B to form the IL-23 interleukin, a heterodimeric cytokine which functions in innate and adaptive immunity. IL-23 may constitute with IL-17 an acute response to infection in peripheral tissues.	5.8	20,729.74	IMMUNOLOGICAL	20729.7
The Human Protein Atlas	ST6 beta-galactoside alpha-2,6-sialyltransferase 1	Transfers sialic acid from CMP-sialic acid to galactose-containing acceptor substrates.	5.69	20,763.85	CATALYTIC ACTIVITY	20763.8
The Human Protein Atlas	Chromosome 6 open reading frame 120	May be involved in induction of apoptosis in CD4(+) T-cells, but not CD8(+) T-cells or hepatocytes.	4.75	20,772.39	CELL DEATH	20772.4
UNIPROT	B-cell antigen receptor complex-associated protein alpha chain	Required in cooperation with CD79B for initiation of the signal transduction cascade activated by binding of antigen to the B-cell antigen receptor complex (BCR) which leads to internalization of the complex, trafficking to late endosomes and antigen presentation. Also required for BCR surface expression and for efficient differentiation of pro- and pre-B-cells. Stimulates SYK autophosphorylation…	4.5	20785.6	SIGNAL	20785.6
UNIPROT	Small ribosomal subunit protein bS1m	Mammalian mitochondrial ribosomal proteins are encoded by nuclear genes and help in protein synthesis within the mitochondrion. Mitochondrial ribosomes (mitoribosomes) consist of a small 28S subunit and a large 39S subunit. They have an estimated 75% protein to rRNA composition compared to prokaryotic ribosomes, where this ratio is reversed. Another difference between mammalian mitoribosomes and …	9.22	20842.8	STRUCTURAL	20842.8
The Human Protein Atlas	Glucagon	Plays a key role in glucose metabolism and homeostasis. Regulates blood glucose by increasing gluconeogenesis and decreasing glycolysis. A counterregulatory hormone of insulin, raises plasma glucose levels in response to insulin-induced hypoglycemia. Plays an important role in initiating and maintaining hyperglycemic conditions in diabetes.	5.85	20,909.21	METABOLIC	20909.2
The Human Protein Atlas	Glutathione peroxidase 7	It protects esophageal epithelia from hydrogen peroxide-induced oxidative stress. It suppresses acidic bile acid-induced reactive oxigen species (ROS) and protects against oxidative DNA damage and double-strand breaks.	8.42	20,996.03	CATALYTIC ACTIVITY	20996
UNIPROT	Prostaglandin-H2 D-isomerase	Catalyzes the conversion of PGH2 to PGD2, a prostaglandin involved in smooth muscle contraction/relaxation and a potent inhibitor of platelet aggregation 1. Involved in a variety of CNS functions, such as sedation, NREM sleep and PGE2-induced allodynia, and may have an anti-apoptotic role in oligodendrocytes. Binds small non-substrate lipophilic molecules, including biliverdin, bilirubin, retinal…	7.66	21028.8	CATALYTIC ACTIVITY	21028.8
The Human Protein Atlas	Prostaglandin D2 synthase	Catalyzes the conversion of PGH2 to PGD2, a prostaglandin involved in smooth muscle contraction/relaxation and a potent inhibitor of platelet aggregation	7.66	21,028.82	BIOMARKER	21028.8
The Human Protein Atlas	Protease associated domain containing 1	Plays a role in the modulation of physical activity and adiposity.	5.23	21,042.15	CELL FUNCTION REGULATOR	21042.2
The Human Protein Atlas	Relaxin 2	Relaxin is an ovarian hormone that acts with estrogen to produce dilatation of the birth canal in many mammals. May be involved in remodeling of connective tissues during pregnancy, promoting growth of pubic ligaments and ripening of the cervix.	8.88	21,042.53	HORMONE	21042.5
The Human Protein Atlas	Cardiotrophin 1	Induces cardiac myocyte hypertrophy in vitro. Binds to and activates the ILST/gp130 receptor.	9.5	21,098.23	ACTIVATOR	21098.2
The Human Protein Atlas	Interleukin 18 binding protein	Isoform A binds to IL-18 and inhibits its activity. Functions as an inhibitor of the early TH1 cytokine response.	6.99	21,099.25	INHIBITOR	21099.2
The Human Protein Atlas	Relaxin 1	Relaxin is an ovarian hormone that acts with estrogen to produce dilatation of the birth canal in many mammals. May be involved in remodeling of connective tissues during pregnancy, promoting growth of pubic ligaments and ripening of the cervix.	8.97	21145.7	HORMONE	21145.7
The Human Protein Atlas	Endothelin 3	Endothelins are endothelium-derived vasoconstrictor peptides.	6.07	21,173.54	VASO-REGULATORY	21173.5
The Human Protein Atlas	Apolipoprotein M	Probably involved in lipid transport.	5.66	21,253.29	CARRIER	21253.3
DOI: 10.1002./pmic.200300449	Apolipoprotein D	It is probably involved in the transport and binding of bilin. Appears to be able to transport a variety of ligands in a number of different contexts.	5.06	21,275.55	METABOLIC	21275.5
The Human Protein Atlas	Corticotropin releasing hormone	Hormone regulating the release of corticotropin from pituitary gland (By similarity). Induces NLRP6 in intestinal epithelial cells, hence may influence gut microbiota profile (By similarity).	10	21,290.57	HORMONE	21290.6
The Human Protein Atlas	Erythropoietin	Hormone involved in the regulation of erythrocyte proliferation and differentiation and the maintenance of a physiological level of circulating erythrocyte mass.	8.64	21305.8	HORMONE	21305.8
The Human Protein Atlas	Secretogranin V	Acts as a molecular chaperone for PCSK2/PC2, preventing its premature activation in the regulated secretory pathway. Binds to inactive PCSK2 in the endoplasmic reticulum and facilitates its transport from there to later compartments of the secretory pathway where it is proteolytically matured and activated	4.79	21,385.84	CELLULAR ORGANIZATION	21385.8
UNIPROT	Cellular tumor antigen p53	Acts as a tumor suppressor in many tumor types; induces growth arrest or apoptosis depending on the physiological circumstances and cell type Involved in cell cycle regulation as a trans-activator that acts to negatively regulate cell division by controlling a set of genes required for this process One of the activated genes is an inhibitor of cyclin-dependent kinases. Apoptosis induction seems t…	7.62	21416.3	CELL DEATH	21416.3
The Human Protein Atlas	Interleukin 11	Cytokine that stimulates the proliferation of hematopoietic stem cells and megakaryocyte progenitor cells and induces megakaryocyte maturation resulting in increased platelet production	10.64	21,429.21	CELL CYCLE	21429.2
The Human Protein Atlas	Interleukin 37	Suppressor of innate inflammatory and immune responses involved in curbing excessive inflammation.	9.1	21,542.75	INFLAMMATORY	21542.8
The Human Protein Atlas	Interferon alpha 2	Produced by macrophages, IFN-alpha have antiviral activities.	6.31	21,578.01	IMMUNOLOGICAL	21578
The Human Protein Atlas	Collectin subfamily member 11	Lectin that plays a role in innate immunity, apoptosis and embryogenesis	4.66	21,589.37	IMMUNOLOGICAL	21589.4
The Human Protein Atlas	Vascular endothelial growth factor B	Growth factor for endothelial cells. VEGF-B167 binds heparin and neuropilin-1 whereas the binding to neuropilin-1 of VEGF-B186 is regulated by proteolysis.	8.44	21,601.77	CELL FUNCTION REGULATOR	21601.8
The Human Protein Atlas	Syndecan 4	Cell surface proteoglycan that bears heparan sulfate. Regulates exosome biogenesis in concert with SDCBP and PDCD6IP	3.89	21,641.56	CELL FUNCTION REGULATOR	21641.6
The Human Protein Atlas	Phospholipase A2 group XIIB	Not known; does not seem to have catalytic activity.	5.75	21,658.73	STRUCTURAL	21658.7
UNIPROT	Troponin I, slow skeletal muscle	Troponin I is the inhibitory subunit of troponin, the thin filament regulatory complex which confers calcium-sensitivity to striated muscle actomyosin ATPase activity.	9.61	21692.3	INHIBITOR	21692.3
The Human Protein Atlas	Ephrin A4	Cell surface GPI-bound ligand for Eph receptors, a family of receptor tyrosine kinases which are crucial for migration, repulsion and adhesion during neuronal, vascular and epithelial development.	5.24	21,698.72	ADHESION	21698.7
The Human Protein Atlas	Interferon lambda 3	Cytokine with antiviral, antitumour and immunomodulatory activities. Plays a critical role in the antiviral host defense, predominantly in the epithelial tissues.	8.69	21,706.37	IMMUNOLOGICAL	21706.4
The Human Protein Atlas	Interferon alpha 16	Produced by macrophages, IFN-alpha have antiviral activities. Interferon stimulates the production of two enzymes: a protein kinase and an oligoadenylate synthetase.	6.3	21,711.08	IMMUNOLOGICAL	21711.1
The Human Protein Atlas	Interferon alpha 1	Produced by macrophages, IFN-alpha have antiviral activities. Interferon stimulates the production of two enzymes: a protein kinase and an oligoadenylate synthetase.	5.29	21,725.06	IMMUNOLOGICAL	21725.1
The Human Protein Atlas	Interferon alpha 17	Produced by macrophages, IFN-alpha have antiviral activities. Interferon stimulates the production of two enzymes: a protein kinase and an oligoadenylate synthetase.	5.67	21,728.06	IMMUNOLOGICAL	21728.1
The Human Protein Atlas	Peptidoglycan recognition protein 1	Innate immunity protein that plays several important functions in antimicrobial and antitumor defense systems. Acts as a pattern receptor that binds to murein peptidoglycans (PGN) of Gram-positive bacteria and thus provides bactericidal activity	8.92	21,730.78	ANTIMICROBIAL	21730.8
The Human Protein Atlas	Interferon alpha 21	Produced by macrophages, IFN-alpha have antiviral activities. Interferon stimulates the production of two enzymes: a protein kinase and an oligoadenylate synthetase.	6.32	21,741.13	IMMUNOLOGICAL	21741.1
The Human Protein Atlas	Interleukin 17C	Cytokine that plays a crucial role in innate immunity of the epithelium, including to intestinal bacterial pathogens, in an autocrine manner. Stimulates the production of antibacterial peptides and proinflammatory molecules for host defense by signaling through the NF-kappa-B and MAPK pathways.	8.4	21,764.93	IMMUNOLOGICAL	21764.9
UNIPROT	Transforming protein RhoA	Small GTPase which cycles between an active GTP-bound and an inactive GDP-bound state. Mainly associated with cytoskeleton organization, in active state binds to a variety of effector proteins to regulate cellular responses such as cytoskeletal dynamics, cell migration and cell cycle 1. Regulates a signal transduction pathway linking plasma membrane receptors to the assembly of focal adhesions an…	5.83	21768.1	CELLULAR ORGANIZATION	21768.1
The Human Protein Atlas	Interferon alpha 4	Produced by macrophages, IFN-alpha have antiviral activities. Interferon stimulates the production of two enzymes: a protein kinase and an oligoadenylate synthetase.	5.75	21,808.05	IMMUNOLOGICAL	21808
The Human Protein Atlas	Interferon alpha 13	Produced by macrophages, IFN-alpha have antiviral activities. Interferon stimulates the production of two enzymes: a protein kinase and an oligoadenylate synthetase.	5.29	21,828.2	IMMUNOLOGICAL	21828.2
The Human Protein Atlas	Interferon alpha 10	Produced by macrophages, IFN-alpha have antiviral activities. Interferon stimulates the production of two enzymes: a protein kinase and an oligoadenylate synthetase.	5.96	21,835.16	IMMUNOLOGICAL	21835.2
The Human Protein Atlas	Insulin like growth factor 1	The insulin-like growth factors, isolated from plasma, are structurally and functionally related to insulin but have a much higher growth-promoting activity.	9.78	21,841.19	CELL CYCLE	21841.2
The Human Protein Atlas	Interleukin 17D	Induces expression of IL6, CXCL8/IL8, and CSF2/GM-CSF from endothelial cells.	9.25	21893.1	SIGNAL	21893.1
The Human Protein Atlas	Interferon lambda 1	Cytokine with antiviral, antitumour and immunomodulatory activities. Plays a critical role in the antiviral host defense, predominantly in the epithelial tissues.	9.08	21,898.41	IMMUNOLOGICAL	21898.4
The Human Protein Atlas	Interferon alpha 5	Produced by macrophages, IFN-alpha have antiviral activities. Interferon stimulates the production of two enzymes: a protein kinase and an oligoadenylate synthetase.	5.23	21,942.39	IMMUNOLOGICAL	21942.4
The Human Protein Atlas	Interferon alpha 8	Produced by macrophages, IFN-alpha have antiviral activities. Interferon stimulates the production of two enzymes: a protein kinase and an oligoadenylate synthetase.	5.29	21,989.34	IMMUNOLOGICAL	21989.3
The Human Protein Atlas	Interferon alpha 14	Produced by macrophages, IFN-alpha have antiviral activities. Interferon stimulates the production of two enzymes: a protein kinase and an oligoadenylate synthetase.	6.82	22062.6	IMMUNOLOGICAL	22062.6
The Human Protein Atlas	Angiopoietin like 8	Hormone that acts as a blood lipid regulator by regulating serum triglyceride levels. May be involved in the metabolic transition between fasting and refeeding: required to direct fatty acids to adipose tissue for storage in the fed state (By similarity).	7.08	22,105.39	HORMONE	22105.4
The Human Protein Atlas	Interferon alpha 7	Produced by macrophages, IFN-alpha have antiviral activities. Interferon stimulates the production of two enzymes: a protein kinase and an oligoadenylate synthetase.	6.24	22,106.54	IMMUNOLOGICAL	22106.5
The Human Protein Atlas	Interferon alpha 6	Produced by macrophages, IFN-alpha have antiviral activities. Interferon stimulates the production of two enzymes: a protein kinase and an oligoadenylate synthetase.	6.9	22,140.6	IMMUNOLOGICAL	22140.6
The Human Protein Atlas	Fibroblast growth factor 21	Stimulates glucose uptake in differentiated adipocytes via the induction of glucose transporter SLC2A1/GLUT1 expression (but not SLC2A4/GLUT4 expression). Activity requires the presence of KLB. Regulates systemic glucose homeostasis and insulin sensitivity.	4.01	22186.9	CELL FUNCTION REGULATOR	22186.9
The Human Protein Atlas	Interferon lambda 2	Plays a critical role in the antiviral host defense, predominantly in the epithelial tissues.	8.16	22,231.95	IMMUNOLOGICAL	22232
The Human Protein Atlas	CD40 molecule	Receptor for TNFSF5/CD40LG 1. Transduces TRAF6- and MAP3K8-mediated signals that activate ERK in macrophages and B cells, leading to induction of immunoglobulin secretion (By similarity).	5.39	22,259.03	IMMUNOLOGICAL	22259
DOI: 10.1002./pmic.200300449	Complement component C8, γ chain	C8 is a constituent of the membrane attack complex. C8 binds to the C5B-7 complex, forming the C5B-8 complex. C5-B8 binds C9 and acts as a catalyst in the polymerization of C9. The gamma subunit seems to be able to bind retinol.	8.49	22,277.47	CATALYTIC ACTIVITY	22277.5
The Human Protein Atlas	Apolipoprotein O	Can promote cardiac lipotoxicity by enhancing mitochondrial respiration and fatty acid metabolism in cardiac myoblasts	9.18	22,284.65	CARRIER	22284.7
The Human Protein Atlas	Interferon beta 1	Has antiviral, antibacterial and anticancer activities.	8.93	22,293.88	ANTIMICROBIAL	22293.9
The Human Protein Atlas	Interferon omega 1	The protein encoded by this gene is an interferon and possesses antiviral activity. The encoded protein binds to the interferon alpha/beta receptor but not to the interferon gamma receptor. This intronless gene has several pseudogenes spread throughout the genome.	9.18	22,319.06	IMMUNOLOGICAL	22319.1
The Human Protein Atlas	Interleukin 18	A proinflammatory cytokine primarily involved in polarized T-helper 1 (Th1) cell and natural killer (NK) cell immune responses (Probable).	4.57	22,334.30	INFLAMMATORY	22334.3
The Human Protein Atlas	Neurturin	Supports the survival of sympathetic neurons in culture. May regulate the development and maintenance of the CNS. Might control the size of non-neuronal cell population such as haemopoietic cells.	10.92	22,405.09	SIGNAL	22405.1
The Human Protein Atlas	Leukocyte immunoglobulin like receptor A2	Part of the innate immune responses against microbial infection. Specifically recognizes a set of N-terminally truncated immunoglobulins that are produced via cleavage by proteases from a range of pathogenic bacteria and fungi, including L.pneumophila, M.hyorhinis, S.pneumoniae, S.aureus and C.albicans.	7.18	22,461.48	IMMUNOLOGICAL	22461.5
DOI: 10.1002./pmic.200300449	Tetranectin	Tetranectin binds to plasminogen and to isolated kringle 4. May be involved in the packaging of molecules destined for exocytosis.	5.52	22,566.84	BIOMARKER	22566.8
The Human Protein Atlas	Angiopoietin like 2	Induces sprouting in endothelial cells through an autocrine and paracrine action.	8.67	22,717.21	CELL CYCLE	22717.2
The Human Protein Atlas	C1q and TNF related 1	Tumor necrosis factor-related protein	8.4	22,741.79	IMMUNOLOGICAL	22741.8
The Human Protein Atlas	Immunoglobulin lambda like polypeptide 1	Critical for B-cell development.	10.1	22,963.04	IMMUNOLOGICAL	22963
The Human Protein Atlas	Retinol binding protein 4	Retinol-binding protein that mediates retinol transport in blood plasma 1. Delivers retinol from the liver stores to the peripheral tissues (Probable). Transfers the bound all-trans retinol to STRA6, that then facilitates retinol transport across the cell membrane	5.73	22,973.8	CARRIER	22973.8
UNIPROT	THAP domain-containing protein 1	DNA-binding transcription regulator that regulates endothelial cell proliferation and G1/S cell-cycle progression. Specifically binds the 5'-[AT]NTNN[GT]GGCA[AGT]-3' core DNA sequence and acts by modulating expression of pRB-E2F cell-cycle target genes, including RRM1. Component of a THAP1/THAP3-HCFC1-OGT complex that is required for the regulation of the transcriptional activity of RRM1. May als…	8.65	23010	CELL FUNCTION REGULATOR	23010
The Human Protein Atlas	Heparin binding EGF like growth factor	Growth factor that mediates its effects via EGFR, ERBB2 and ERBB4. Required for normal cardiac valve formation and normal heart function. Promotes smooth muscle cell proliferation. May be involved in macrophage-mediated cellular proliferation.	9.47	23,066.97	ANTI-INFLAMMATORY	23067
The Human Protein Atlas	Glutamine amidotransferase like class 1 domain containing 1	UNSPECIFIC	6.14	23,297.55	UNSPECIFIC	23297.5
The Human Protein Atlas	Carboxypeptidase B2	Cleaves C-terminal arginine or lysine residues from biologically active peptides such as kinins or anaphylatoxins in the circulation thereby regulating their activities.	6.22	23,400.97	CELL FUNCTION REGULATOR	23401
The Human Protein Atlas	Serpin family A member 3	Although its physiological function is unclear, it can inhibit neutrophil cathepsin G and mast cell chymase, both of which can convert angiotensin-1 to the active angiotensin-2.	5.44	23,406.09	INHIBITOR	23406.1
The Human Protein Atlas	Matrix remodeling associated 7	UNSPECIFIC	6.05	23,411.99	UNSPECIFIC	23412
The Human Protein Atlas	Orosomucoid 1	Functions as transport protein in the blood stream. Binds various ligands in the interior of its beta-barrel domain. Also binds synthetic drugs and influences their distribution and availability in the body. Appears to function in modulating the activity of the immune system during the acute-phase reaction.	5.02	23,539.62	CARRIER	23539.6
The Human Protein Atlas	Orosomucoid 2	Functions as transport protein in the blood stream. Binds various ligands in the interior of its beta-barrel domain. Also binds synthetic drugs and influences their distribution and availability in the body. Appears to function in modulating the activity of the immune system during the acute-phase reaction.	4.93	23,543.62	CARRIER	23543.6
The Human Protein Atlas	Proteinase 3	Serine protease that degrades elastin, fibronectin, laminin, vitronectin, and collagen types I, III, and IV (in vitro)	8.49	23,611.18	METABOLIC	23611.2
The Human Protein Atlas	Interleukin 6	Cytokine with a wide variety of biological functions in immunity, tissue regeneration, and metabolism. Binds to IL6R, then the complex associates to the signaling subunit IL6ST/gp130 to trigger the intracellular IL6-signaling pathway (Probable).	6.17	23,661.17	IMMUNOLOGICAL	23661.2
The Human Protein Atlas	Interleukin 1 receptor like 1	Receptor for interleukin-33 (IL-33); signaling requires association of the coreceptor IL1RAP.	6.1	23,722.84	RECEPTOR	23722.8
The Human Protein Atlas	Peptidylprolyl isomerase B	PPIase that catalyzes the cis-trans isomerization of proline imidic peptide bonds in oligopeptides and may therefore assist protein folding.	9.42	23,742.54	CATALYTIC ACTIVITY	23742.5
The Human Protein Atlas	Ephrin A1	Plays an important role in angiogenesis and tumor neovascularization.	6.34	23,787.07	ADHESION	23787.1
The Human Protein Atlas	Immunoglobulin heavy variable 4-38-2-like	V region of the variable domain of immunoglobulin heavy chains that participates in the antigen recognition	9.19	23,839.11	IMMUNOLOGICAL	23839.1
The Human Protein Atlas	Interleukin 24	Has antiproliferative properties on melanoma cells and may contribute to terminal cell differentiation.	8.94	23,911.8	CELL CYCLE	23911.8
The Human Protein Atlas	Interleukin 12A	Cytokine that can act as a growth factor for activated T and NK cells, enhance the lytic activity of NK/lymphokine-activated killer cells, and stimulate the production of IFN-gamma by resting PBMC.	8.88	23,955.13	CELL CYCLE	23955.1
The Human Protein Atlas	Fibroblast growth factor 19	Involved in the suppression of bile acid biosynthesis through down-regulation of CYP7A1 expression, following positive regulation of the JNK and ERK1/2 cascades. Stimulates glucose uptake in adipocytes. Activity requires the presence of KLB and FGFR4.	6.55	24002.6	CELL FUNCTION REGULATOR	24002.6
The Human Protein Atlas	Chromosome 4 open reading frame 48	UNSPECIFIC	5.29	24,009.96	UNSPECIFIC	24010
The Human Protein Atlas	High mobility group box 2	Multifunctional protein with various roles in different cellular compartments. May act in a redox sensitive manner.	7.62	24,033.75	INFLAMMATORY	24033.8
The Human Protein Atlas	Platelet derived growth factor subunit A	Growth factor that plays an essential role in the regulation of embryonic development, cell proliferation, cell migration, survival and chemotaxis.	9.52	24,042.93	CELL CYCLE	24042.9
The Human Protein Atlas	Cellular repressor of E1A stimulated genes 1	May contribute to the transcriptional control of cell growth and differentiation. Antagonizes transcriptional activation and cellular transformation by the adenovirus E1A protein.	7.06	24,074.54	TRANSCRIPTION	24074.5
The Human Protein Atlas	Cardiotrophin like cytokine factor 1	In complex with CRLF1, forms a heterodimeric neurotropic cytokine that plays a crucial role during neuronal development (Probable). Also stimulates B-cells. Binds to and activates the ILST/gp130 receptor.	8.87	24,086.79	ACTIVATOR	24086.8
UNIPROT	von Hippel-Lindau disease tumor suppressor	Involved in the ubiquitination and subsequent proteasomal degradation via the von Hippel-Lindau ubiquitination complex 1, 2, 3. Seems to act as a target recruitment subunit in the E3 ubiquitin ligase complex and recruits hydroxylated hypoxia-inducible factor (HIF) under normoxic conditions 4, 5. Involved in transcriptional repression through interaction with HIF1A, HIF1AN and histone deacetylases…	4.68	24152.8	CARRIER	24152.8
The Human Protein Atlas	Endothelin 1	Promotes adhesion of endothelial cells through interaction with the alpha-v/beta-3 integrin receptor. Inhibits formation of vascular-like structures. May be involved in regulation of vascular morphogenesis of remodeling in embryonic development.	9.52	24,425.09	VASO-REGULATORY	24425.1
The Human Protein Atlas	Interleukin 19	May play some important roles in inflammatory responses. Up-regulates IL-6 and TNF-alpha and induces apoptosis (By similarity).	8.03	24,507.52	CELL CYCLE	24507.5
The Human Protein Atlas	ADAM metallopeptidase with thrombospondin type 1 motif 13	Cleaves the vWF multimers in plasma into smaller forms thereby controlling vWF-mediated platelet thrombus formation.	8.57	24,546.05	COAGULATION	24546
The Human Protein Atlas	Growth hormone 1	Plays an important role in growth control. Its major role in stimulating body growth is to stimulate the liver and other tissues to secrete IGF-1.	5.29	24,847.27	CELL CYCLE	24847.3
The Human Protein Atlas	Insulin like 6	May have a role in sperm development and fertilization.	9.71	24,859.57	INHIBITOR	24859.6
UNIPROT	High mobility group protein B1	Multifunctional redox sensitive protein with various roles in different cellular compartments. In the nucleus is one of the major chromatin-associated non-histone proteins and acts as a DNA chaperone involved in replication, transcription, chromatin remodeling, V(D)J recombination, DNA repair and genome stability 1. Proposed to be an universal biosensor for nucleic acids. Promotes host inflammato…	5.59	24893.8	CARRIER	24893.8
UNIPROT	Phospholipid-transporting ATPase ABCA1	Catalyzes the translocation of specific phospholipids from the cytoplasmic to the extracellular/lumenal leaflet of membrane coupled to the hydrolysis of ATP 1, 2. Thereby, participates in phospholipid transfer to apolipoproteins to form nascent high density lipoproteins/HDLs 3. Transports preferentially phosphatidylcholine over phosphatidylserine 4. May play a similar role in the efflux of intrac…	5.43	24943.7	CATALYTIC ACTIVITY	24943.7
The Human Protein Atlas	Chorionic somatomammotropin hormone 2	Produced only during pregnancy and is involved in stimulating lactation, fetal growth and metabolism.	5.34	24,994.38	CELL FUNCTION REGULATOR	24994.4
DOI: 10.1002./pmic.200300449	C-reactive protein	Displays several functions associated with host defense: it promotes agglutination, bacterial capsular swelling, phagocytosis and complement fixation through its calcium-dependent binding to phosphorylcholine.	5.45	25,038.58	IMMUNOLOGICAL	25038.6
The Human Protein Atlas	Prolactin	Prolactin acts primarily on the mammary gland by promoting lactation.	6.15	25,092.94	CELL FUNCTION REGULATOR	25092.9
The Human Protein Atlas	Progesterone immunomodulatory binding factor 1	Plays a role in ciliogenesis.	9.2	25,124.63	CELL FUNCTION REGULATOR	25124.6
The Human Protein Atlas	Zinc finger BED-type containing 3	Acts as a positive regulator in the activation of the canonical Wnt/beta-catenin signaling pathway by stabilizing cytoplasmic beta-catenin (By similarity). Involved in transcription activation of Wnt target gene expression (By similarity). Plays a role in symmetric division of blastomeres in the early stages of embryogenesis via regulation of mitotic spindle central positioning and organization o…	8.65	25,132.18	SIGNAL	25132.2
The Human Protein Atlas	Interferon kappa	May play a role in the regulation of immune cell function. Cytokine that imparts cellular protection against viral infection in a species-specific manner.	8.15	25,219.18	CELL FUNCTION REGULATOR	25219.2
The Human Protein Atlas	C1q and TNF related 5	UNSPECIFIC	6.05	25,298.42	UNSPECIFIC	25298.4
UNIPROT	Serum amyloid P-component	Can interact with DNA and histones and may scavenge nuclear material released from damaged circulating cells. May also function as a calcium-dependent lectin.	6.9	25387.1	CARRIER	25387.1
DOI: 10.1002./pmic.200300449	Serum amyloid P component	Can interact with DNA and histones and may scavenge nuclear material released from damaged circulating cells. May also function as a calcium-dependent lectin.	6.1	25,387.13	ADHESION	25387.1
The Human Protein Atlas	Epstein-Barr virus induced 3	IL-27 has pro- and anti-inflammatory properties, that can regulate T-helper cell development, suppress T-cell proliferation, stimulate cytotoxic T-cell activity, induce isotype switching in B-cells, and that has diverse effects on innate immune cells.	9.41	25,396.35	IMMUNOLOGICAL	25396.3
DOI: 10.1002./pmic.200300449	Catepsin L	Thiol protease important for the overall degradation of proteins in lysosomes (Probable). Plays a critical for normal cellular functions such as general protein turnover, antigen processing and bone remodeling.	6.31	25,500.66	CATALYTIC ACTIVITY	25500.7
UNIPROT	Cytochrome c oxidase subunit 2	Component of the cytochrome c oxidase, the last enzyme in the mitochondrial electron transport chain which drives oxidative phosphorylation. The respiratory chain contains 3 multisubunit complexes succinate dehydrogenase (complex II, CII), ubiquinol-cytochrome c oxidoreductase (cytochrome b-c1 complex, complex III, CIII) and cytochrome c oxidase (complex IV, CIV), that cooperate to transfer elect…	3.67	25565	CARRIER	25565
The Human Protein Atlas	Triggering receptor expressed on myeloid cells 1	[Isoform 1]: Cell surface receptor that plays important roles in innate and adaptive immunity by amplifying inflammatory responses 1, 2. Upon activation by various ligands such as PGLYRP1, HMGB1 or HSP70, multimerizes and forms a complex with transmembrane adapter TYROBP/DAP12	8.16	25,574.49	IMMUNOLOGICAL	25574.5
The Human Protein Atlas	Tumor necrosis factor	Cytokine that binds to TNFRSF1A/TNFR1 and TNFRSF1B/TNFBR. It is mainly secreted by macrophages and can induce cell death of certain tumor cell lines. It is potent pyrogen causing fever by direct action or by stimulation of interleukin-1 secretion and is implicated in the induction of cachexia, Under certain conditions it can stimulate cell proliferation and induce cell differentiation. Impairs re…	6.44	25,644.42	IMMUNOLOGICAL	25644.4
UNIPROT	Serine protease 1	Has activity against the synthetic substrates Boc-Phe-Ser-Arg-Mec, Boc-Leu-Thr-Arg-Mec, Boc-Gln-Ala-Arg-Mec and Boc-Val-Pro-Arg-Mec. The single-chain form is more active than the two-chain form against all of these substrates.	6.07	25697	ENZYME	25697
The Human Protein Atlas	Meteorin like, glial cell differentiation regulator	Hormone induced following exercise or cold exposure that promotes energy expenditure. Induced either in the skeletal muscle after exercise or in adipose tissue following cold exposure and is present in the circulation.	7.22	25,738.06	HORMONE	25738.1
The Human Protein Atlas	Complement C1q C chain	C1q associates with the proenzymes C1r and C1s to yield C1, the first component of the serum complement system.	8.61	25,773.65	IMMUNOLOGICAL	25773.7
The Human Protein Atlas	Noggin	Inhibitor of bone morphogenetic proteins (BMP) signaling which is required for growth and patterning of the neural tube and somite.	9.1	25,773.89	INHIBITOR	25773.9
The Human Protein Atlas	Notch 2 N-terminal like A	Human-specific protein that promotes neural progenitor proliferation and evolutionary expansion of the brain neocortex by regulating the Notch signaling pathway	5.44	25,834.82	SIGNAL	25834.8
The Human Protein Atlas	Notch 2 N-terminal like C	Human-specific protein that promotes neural progenitor proliferation and evolutionary expansion of the brain neocortex by regulating the Notch signaling pathway	5.44	25,834.82	SIGNAL	25834.8
The Human Protein Atlas	Superoxide dismutase 3	Protect the extracellular space from toxic effect of reactive oxygen intermediates by converting superoxide radicals into hydrogen peroxide and oxygen.	6.13	25,850.91	CATALYTIC ACTIVITY	25850.9
UNIPROT	Tight junction protein 1	TJP1, TJP2, and TJP3 are closely related scaffolding proteins that link tight junction (TJ) transmembrane proteins such as claudins, junctional adhesion molecules, and occludin to the actin cytoskeleton 1, 2. The tight junction acts to limit movement of substances through the paracellular space and as a boundary between the compositionally distinct apical and basolateral plasma membrane domains o…	9.90	25872.4	STRUCTURAL	25872.4
The Human Protein Atlas	Complement C1q A chain	C1q associates with the proenzymes C1r and C1s to yield C1, the first component of the serum complement system.	9.26	26,016.57	IMMUNOLOGICAL	26016.6
The Human Protein Atlas	Fc fragment of IgG receptor IIIb	Receptor for the Fc region of immunoglobulins gamma. Low affinity receptor. Binds complexed or aggregated IgG and also monomeric IgG.	6.43	26,086.74	ADHESION	26086.7
The Human Protein Atlas	Mannose binding lectin 2	Calcium-dependent lectin involved in innate immune defense.	5.39	26143.5	IMMUNOLOGICAL	26143.5
The Human Protein Atlas	Galectin 3	Galactose-specific lectin which binds IgE. May mediate with the alpha-3, beta-1 integrin the stimulation by CSPG4 of endothelial cells migration. Together with DMBT1, required for terminal differentiation of columnar epithelial cells during early embryogenesis (By similarity).	8.5	26,152.34	CELL CYCLE	26152.3
The Human Protein Atlas	TNF superfamily member 14	Cytokine that binds to TNFRSF3/LTBR. Binding to the decoy receptor TNFRSF6B modulates its effects. Acts as a ligand for TNFRSF14/HVEM. Upon binding to TNFRSF14/HVEM, delivers costimulatory signals to T cells, leading to T cell proliferation and IFNG production	8.46	26,351.21	IMMUNOLOGICAL	26351.2
UNIPROT	Adiponectin	Important adipokine involved in the control of fat metabolism and insulin sensitivity, with direct anti-diabetic, anti-atherogenic and anti-inflammatory activities. Stimulates AMPK phosphorylation and activation in the liver and the skeletal muscle, enhancing glucose utilization and fatty-acid combustion. Antagonizes TNF-alpha by negatively regulating its expression in various tissues such as liv…	5.42	26413.6	METABOLIC	26413.6
The Human Protein Atlas	Adiponectin, C1Q and collagen domain containing	Receptor involved in cell adhesion and probably in cell-cell interactions. Mediates cell matrix adhesion in developing neurons and hematopoietic stem cells.	5.42	26,413.64	ADHESION	26413.6
DOI: 10.1002./pmic.200300449	Adiponectin	Important adipokine involved in the control of fat metabolism and insulin sensitivity, with direct anti-diabetic, anti-atherogenic and anti-inflammatory activities.	5.42	26,413.64	ANTI-INFLAMMATORY	26413.6
The Human Protein Atlas	Complement C1q B chain	Serine protease that combines with C1q and C1s to form C1, the first component of the classical pathway of the complement system	8.83	26,459.37	IMMUNOLOGICAL	26459.4
The Human Protein Atlas	Alpha-1-microglobulin/bikunin precursor	Inter-alpha-trypsin inhibitor inhibits trypsin, plasmin, and lysosomal granulocytic elastase. Inhibits calcium oxalate crystallization.	8.83	26,471.55	COAGULATION	26471.5
UNIPROT	Tissue factor pathway inhibitor 2	May play a role in the regulation of plasmin-mediated matrix remodeling. Inhibits trypsin, plasmin, factor VIIa/tissue factor and weakly factor Xa. Has no effect on thrombin.	8.88	26558.1	INHIBITOR	26558.1
UNIPROT	Mannose-P-dolichol utilization defect 1 protein	Required for normal utilization of mannose-dolichol phosphate (Dol-P-Man) in the synthesis of N-linked and O-linked oligosaccharides and GPI anchors.	9.13	26637.8	CELL FUNCTION REGULATOR	26637.8
The Human Protein Atlas	ER membrane protein complex subunit 10	Part of the endoplasmic reticulum membrane protein complex (EMC) that enables the energy-independent insertion into endoplasmic reticulum membranes of newly synthesized membrane proteins	5.9	26,806.33	CELLULAR ORGANIZATION	26806.3
The Human Protein Atlas	Folate receptor gamma	Binds to folate and reduced folic acid derivatives and mediates delivery of 5-methyltetrahydrofolate to the interior of cells. Isoform Short does not bind folate.	8.26	26883.5	RECEPTOR	26883.5
UNIPROT	Platelet-derived growth factor subunit B	Growth factor that plays an essential role in the regulation of embryonic development, cell proliferation, cell migration, survival and chemotaxis. Potent mitogen for cells of mesenchymal origin 1. Required for normal proliferation and recruitment of pericytes and vascular smooth muscle cells in the central nervous system, skin, lung, heart and placenta. Required for normal blood vessel developme…	9.39	26933.9	CELL FUNCTION REGULATOR	26933.9
The Human Protein Atlas	TNF superfamily member 13	Cytokine that binds to TNFRSF13B/TACI and to TNFRSF17/BCMA. Plays a role in the regulation of tumor cell growth. May be involved in monocyte/macrophage-mediated immunological processes.	9.58	27,031.80	CELL FUNCTION REGULATOR	27031.8
The Human Protein Atlas	Coagulation factor III, tissue factor	TF plays a role in normal hemostasis by initiating the cell-surface assembly and propagation of the coagulation protease cascade.	6.63	27,145.41	COAGULATION	27145.4
UNIPROT	Stabilin-1	Acts as a scavenger receptor for acetylated low density lipoprotein. Binds to both Gram-positive and Gram-negative bacteria and may play a role in defense against bacterial infection. When inhibited in endothelial tube formation assays, there is a marked decrease in cell-cell interactions, suggesting a role in angiogenesis. Involved in the delivery of newly synthesized CHID1/SI-CLP from the biosy…	6.05	27283.5	RECEPTOR	27283.5
The Human Protein Atlas	Platelet derived growth factor subunit B	Potent mitogen for cells of mesenchymal origin 1. Required for normal proliferation and recruitment of pericytes and vascular smooth muscle cells in the central nervous system, skin, lung, heart and placenta.	9.39	27,283.45	CELL CYCLE	27283.5
UNIPROT	Ankyrin repeat domain-containing protein 49	Induces HBG1 expression 1, 2. May have a role in spermatogenesis where it promotes autophagy in response to serum starvation, via the NF-kappaB pathway	5	27290.2	CELL FUNCTION REGULATOR	27290.2
The Human Protein Atlas	Notch 2 N-terminal like B	Human-specific protein that promotes neural progenitor proliferation and evolutionary expansion of the brain neocortex by regulating the Notch signaling pathway	5.22	27,301.49	SIGNAL	27301.5
The Human Protein Atlas	B and T lymphocyte associated	Inhibitory receptor on lymphocytes that negatively regulates antigen receptor signaling via PTPN6/SHP-1 and PTPN11/SHP-2 1, 2, 3, 4. May interact in cis (on the same cell) or in trans (on other cells) with TNFRSF14 5. In cis interactions, appears to play an immune regulatory role inhibiting in trans interactions in naive T cells to maintain a resting state. In trans interactions, can predominate …	5.53	27332.8	INHIBITOR	27332.8
The Human Protein Atlas	Proprotein convertase subtilisin/kexin type 1 inhibitor	May function in the control of the neuroendocrine secretory pathway. Proposed be a specific endogenous inhibitor of PCSK1. ProSAAS and Big PEN-LEN, both containing the C-terminal inhibitory domain, but not the further processed peptides reduce PCSK1 activity in the endoplasmic reticulum and Golgi.	6.22	27,372.37	INHIBITOR	27372.4
The Human Protein Atlas	Granzyme M	Cleaves peptide substrates after methionine, leucine, and norleucine. Physiological substrates include EZR, alpha-tubulins and the apoptosis inhibitor BIRC5/Survivin. Promotes caspase activation and subsequent apoptosis of target cells.	10.06	27,446.16	IMMUNOLOGICAL	27446.2
The Human Protein Atlas	Interleukin 34	Cytokine that promotes the proliferation, survival and differentiation of monocytes and macrophages. Promotes the release of proinflammatory chemokines, and thereby plays an important role in innate immunity and in inflammatory processes. Plays an important role in the regulation of osteoclast proliferation and differentiation, and in the regulation of bone resorption.	7.55	27,480.71	IMMUNOLOGICAL	27480.7
The Human Protein Atlas	Interleukin 27	Associates with EBI3 to form the IL-27 interleukin, a heterodimeric cytokine which functions in innate immunity. IL-27 has pro- and anti-inflammatory properties, that can regulate T-helper cell development, suppress T-cell proliferation, stimulate cytotoxic T-cell activity, induce isotype switching in B-cells, and that has diverse effects on innate immune cells.	6.18	27,492.78	INFLAMMATORY	27492.8
The Human Protein Atlas	C-X-C motif chemokine ligand 16	Acts as a scavenger receptor on macrophages, which specifically binds to OxLDL (oxidized low density lipoprotein), suggesting that it may be involved in pathophysiology such as atherogenesis (By similarity). Induces a strong chemotactic response. Induces calcium mobilization. Binds to CXCR6/Bonzo.	9.06	27,594.63	RECEPTOR	27594.6
The Human Protein Atlas	Granzyme B	Abundant protease in the cytosolic granules of cytotoxic T-cells and NK-cells which activates caspase-independent pyroptosis when delivered into the target cell through the immunological synapse	9.56	27662.1	CELL DEATH	27662.1
UNIPROT	Basal cell adhesion molecule	Laminin alpha-5 receptor. May mediate intracellular signaling.	6.33	27705.3	SIGNAL	27705.3
UNIPROT	Neurotrophic factor BDNF precursor form	Important signaling molecule that activates signaling cascades downstream of NTRK2 1. During development, promotes the survival and differentiation of selected neuronal populations of the peripheral and central nervous systems. Participates in axonal growth, pathfinding and in the modulation of dendritic growth and morphology. Major regulator of synaptic transmission and plasticity at adult synap…	9.01	27817.9	ACTIVATOR	27817.9
The Human Protein Atlas	Brain derived neurotrophic factor	Participates in axonal growth, pathfinding and in the modulation of dendritic growth and morphology.	8.73	27,817.94	CELL FUNCTION REGULATOR	27817.9
The Human Protein Atlas	Complement factor D	Factor D cleaves factor B when the latter is complexed with factor C3b, activating the C3bbb complex, which then becomes the C3 convertase of the alternate pathway. Its function is homologous to that of C1s in the classical pathway.	6.82	27,862.80	ACTIVATOR	27862.8
UNIPROT	Myeloblastin	Serine protease that degrades elastin, fibronectin, laminin, vitronectin, and collagen types I, III, and IV (in vitro) 1, 2, 3. By cleaving and activating receptor F2RL1/PAR-2, enhances endothelial cell barrier function and thus vascular integrity during neutrophil transendothelial migration 4. May play a role in neutrophil transendothelial migration, probably when associated with CD177 5.	8.72	27863.1	ACTIVATOR	27863.1
The Human Protein Atlas	Insulin like growth factor binding protein 4	IGF-binding proteins prolong the half-life of the IGFs and have been shown to either inhibit or stimulate the growth promoting effects of the IGFs on cell culture. They alter the interaction of IGFs with their cell surface receptors.	6.81	27,933.97	INHIBITOR	27934
The Human Protein Atlas	Heparin binding growth factor	[Isoform 1]: Acts as a transcriptional repressor . Has mitogenic activity for fibroblasts. Heparin-binding protein.	4.77	28,280.09	ANTI-INFLAMMATORY	28280.1
The Human Protein Atlas	FAM3 metabolism regulating signaling molecule B	Induces apoptosis of alpha and beta cells in a dose- and time-dependent manner.	8.96	28,282.33	CELL DEATH	28282.3
DOI: 10.1002./pmic.200300449	Complement C4b- binding protein, β chain	Controls the classical pathway of complement activation.	5.05	28,286.36	ACTIVATOR	28286.4
The Human Protein Atlas	Oncostatin M	Growth regulator. Inhibits the proliferation of a number of tumor cell lines. Stimulates proliferation of AIDS-KS cells. It regulates cytokine production, including IL-6, G-CSF and GM-CSF from endothelial cells.	10.71	28,484.01	INFLAMMATORY	28484
The Human Protein Atlas	Elastase, neutrophil expressed	Modifies the functions of natural killer cells, monocytes and granulocytes. Inhibits C5a-dependent neutrophil enzyme release and chemotaxis	9.71	28,518.06	ANTIMICROBIAL	28518.1
The Human Protein Atlas	Tissue factor pathway inhibitor	Inhibits factor X (X(a)) directly and, in a Xa-dependent way, inhibits VIIa/tissue factor activity, presumably by forming a quaternary Xa/LACI/VIIa/TF complex. It possesses an antithrombotic action and also the ability to associate with lipoproteins in plasma.	5.21	28,652.64	COAGULATION	28652.6
The Human Protein Atlas	Chorionic somatomammotropin hormone 1	Produced only during pregnancy and is involved in stimulating lactation, fetal growth and metabolism.	5.06	28,765.55	CELL FUNCTION REGULATOR	28765.5
UNIPROT	Eukaryotic translation initiation factor 4E	Acts in the cytoplasm to initiate and regulate protein synthesis and is required in the nucleus for export of a subset of mRNAs from the nucleus to the cytoplasm which promotes processes such as RNA capping, processing and splicing 1, 2, 3, 4, 5. Component of the protein complex eIF4F, which is involved in the recognition of the mRNA cap, ATP-dependent unwinding of 5'-terminal secondary structure…	6.01	28777.7	ACTIVATOR	28777.7
The Human Protein Atlas	Insulin like growth factor binding protein 7	Binds IGF-I and IGF-II with a relatively low affinity. Stimulates prostacyclin (PGI2) production. Stimulates cell adhesion.	8.51	28,860.03	ADHESION	28860
The Human Protein Atlas	Growth hormone 2	Plays an important role in growth control. Its major role in stimulating body growth is to stimulate the liver and other tissues to secrete IGF-1.	5.96	28,875.02	CELL CYCLE	28875
The Human Protein Atlas	Granzyme K	This gene product is a member of a group of related serine proteases from the cytoplasmic granules of cytotoxic lymphocytes. Cytolytic T lymphocytes (CTL) and natural killer (NK) cells share the remarkable ability to recognize, bind, and lyse specific target cells. They are thought to protect their host by lysing cells bearing on their surface 'nonself' antigens, usually peptides or proteins resu…	9.48	28,882.43	IMMUNOLOGICAL	28882.4
The Human Protein Atlas	Fc fragment of IgG receptor IIIa	Receptor for the Fc region of IgG. Binds complexed or aggregated IgG and also monomeric IgG. Mediates antibody-dependent cellular cytotoxicity (ADCC) and other antibody-dependent responses, such as phagocytosis.	8.51	28,935.95	ADHESION	28936
The Human Protein Atlas	Granzyme A	Abundant protease in the cytosolic granules of cytotoxic T-cells and NK-cells which activates caspase-independent pyroptosis when delivered into the target cell through the immunological synapse	9.14	28,968.72	CELL DEATH	28968.7
The Human Protein Atlas	Insulin like growth factor binding protein 1	IGF-binding proteins prolong the half-life of the IGFs and have been shown to either inhibit or stimulate the growth promoting effects of the IGFs on cell culture. They alter the interaction of IGFs with their cell surface receptors. Promotes cell migration.	8.29	29,005.48	INHIBITOR	29005.5
The Human Protein Atlas	Insulin like growth factor binding protein like 1	May be a putative tumor suppressor protein.	8.29	29,005.48	INHIBITOR	29005.5
The Human Protein Atlas	Chromosome 17 open reading frame 99	Probable B cell-associated cytokine that plays a role in the regulation of humoral immune responses. Involved in lymphocyte B cell development and immunoglobulin/IgA production.	9.06	29,061.35	CELL FUNCTION REGULATOR	29061.3
The Human Protein Atlas	Junctional adhesion molecule 3	Plays a role in homing and mobilization of hematopoietic stem and progenitor cells within the bone marrow.	7.55	29,223.3	CELLULAR ORGANIZATION	29223.3
The Human Protein Atlas	CD40 ligand	Cytokine that acts as a ligand to CD40/TNFRSF5 . Costimulates T-cell proliferation and cytokine production	8.53	29,273.53	IMMUNOLOGICAL	29273.5
The Human Protein Atlas	Proopiomelanocortin	[Corticotropin]: Stimulates the adrenal glands to release cortisol.	7.56	29,423.97	CELL FUNCTION REGULATOR	29424
The Human Protein Atlas	Ribonuclease T2	Ribonuclease that plays an essential role in innate immune response by recognizing and degrading RNAs from microbial pathogens that are subsequently sensed by TLR8	6.66	29,480.81	IMMUNOLOGICAL	29480.8
The Human Protein Atlas	Folate receptor alpha	Binds to folate and reduced folic acid derivatives and mediates delivery of 5-methyltetrahydrofolate and folate analogs into the interior of cells 1, 2, 3, 4, 5, 6. Has high affinity for folate and folic acid analogs at neutral pH 7, 8, 9, 10, 11. Exposure to slightly acidic pH after receptor endocytosis triggers a conformation change that strongly reduces its affinity for folates and mediates th…	8.3	29819.1	RECEPTOR	29819.1
UNIPROT	Cytochrome c oxidase subunit 3	Component of the cytochrome c oxidase, the last enzyme in the mitochondrial electron transport chain which drives oxidative phosphorylation. The respiratory chain contains 3 multisubunit complexes succinate dehydrogenase (complex II, CII), ubiquinol-cytochrome c oxidoreductase (cytochrome b-c1 complex, complex III, CIII) and cytochrome c oxidase (complex IV, CIV), that cooperate to transfer elect…	6.78	29863.7	CARRIER	29863.7
The Human Protein Atlas	Aminoacyl tRNA synthetase complex interacting multifunctional protein 1	Non-catalytic component of the multisynthase complex. Stimulates the catalytic activity of cytoplasmic arginyl-tRNA synthase	8.52	29,919.63	CATALYTIC ACTIVITY	29919.6
UNIPROT	Tumor necrosis factor-inducible gene 6 protein	Major regulator of extracellular matrix organization during tissue remodeling 1, 2, 3. Catalyzes the transfer of a heavy chain (HC) from inter-alpha-inhibitor (I-alpha-I) complex to hyaluronan. Cleaves the ester bond between the C-terminus of the HC and GalNAc residue of the chondroitin sulfate chain in I-alpha-I complex followed by transesterification of the HC to hyaluronan. In the process, pot…	6.3	29986.6	CATALYTIC ACTIVITY	29986.6
UNIPROT	Bisphosphoglycerate mutase	Plays a major role in regulating hemoglobin oxygen affinity by controlling the levels of its allosteric effector 2,3-bisphosphoglycerate (2,3-BPG). Also exhibits mutase (EC 5.4.2.11) activity.	6.1	30005.2	CELL FUNCTION REGULATOR	30005.2
The Human Protein Atlas	Serine protease 57	Serine protease that cleaves preferentially after Arg residues. Can also cleave after citrulline (deimidated arginine) and methylarginine residues	9.49	30,278.86	IMMUNOLOGICAL	30278.9
The Human Protein Atlas	Integral membrane protein 2B	Plays a regulatory role in the processing of the amyloid-beta A4 precursor protein (APP) and acts as an inhibitor of the amyloid-beta peptide aggregation and fibrils deposition. Plays a role in the induction of neurite outgrowth.	5	30,338.04	RECEPTOR	30338
The Human Protein Atlas	Inter-alpha-trypsin inhibitor heavy chain 1	May act as a carrier of hyaluronan in serum or as a binding protein between hyaluronan and other matrix protein, including those on cell surfaces in tissues to regulate the localization, synthesis and degradation of hyaluronan which are essential to cells undergoing biological processes.	6.02	30,504.32	INHIBITOR	30504.3
UNIPROT	Tryptase alpha/beta-1	Tryptase is the major neutral protease present in mast cells and is secreted upon the coupled activation-degranulation response of this cell type. May play a role in innate immunity. Isoform 2 cleaves large substrates, such as fibronectin, more efficiently than isoform 1, but seems less efficient toward small substrates 1.	6.61	30515.1	IMMUNOLOGICAL	30515.1
The Human Protein Atlas	TNF superfamily member 11	Cytokine that binds to TNFRSF11B/OPG and to TNFRSF11A/RANK. Osteoclast differentiation and activation factor. Augments the ability of dendritic cells to stimulate naive T-cell proliferation. May be an important regulator of interactions between T-cells and dendritic cells and may play a role in the regulation of the T-cell-dependent immune response. May also play an important role in enhanced bon…	6.59	30,522.58	ACTIVATOR	30522.6
The Human Protein Atlas	Tryptase beta 2	Tryptase is the major neutral protease present in mast cells and is secreted upon the coupled activation-degranulation response of this cell type. May play a role in innate immunity.	6.63	30,529.18	IMMUNOLOGICAL	30529.2
The Human Protein Atlas	Insulin like growth factor binding protein 5	IGF-binding proteins prolong the half-life of the IGFs and have been shown to either inhibit or stimulate the growth promoting effects of the IGFs on cell culture. They alter the interaction of IGFs with their cell surface receptors.	8.58	30,570.24	INHIBITOR	30570.2
The Human Protein Atlas	Interleukin 1 alpha	Produced by activated macrophages, IL-1 stimulates thymocyte proliferation by inducing IL-2 release, B-cell maturation and proliferation, and fibroblast growth factor activity.	5.04	30,606.61	CELL CYCLE	30606.6
UNIPROT	Tumor necrosis factor receptor superfamily member 5	This gene is a member of the TNF-receptor superfamily. The encoded protein is a receptor on antigen-presenting cells of the immune system and is essential for mediating a broad variety of immune and inflammatory responses including T cell-dependent immunoglobulin class switching, memory B cell development, and germinal center formation. AT-hook transcription factor AKNA is reported to coordinatel…	5.48	30619	RECEPTOR	30619
The Human Protein Atlas	C1q and TNF related 7	Tumor necrosis factor-related protein	5.11	30,683.36	IMMUNOLOGICAL	30683.4
The Human Protein Atlas	Collectin subfamily member 10	Lectin that binds to various sugars: galactose > mannose = fucose > N-acetylglucosamine > N-acetylgalactosamine. Acts as a chemoattractant, probably involved in the regulation of cell migration	6.7	30,705.03	ADHESION	30705
The Human Protein Atlas	Interleukin 1 beta	Potent proinflammatory cytokine. Initially discovered as the major endogenous pyrogen, induces prostaglandin synthesis, neutrophil influx and activation, T-cell activation and cytokine production, B-cell activation and antibody production, and fibroblast proliferation and collagen production.	4.7	30,747.91	INFLAMMATORY	30747.9
The Human Protein Atlas	Interleukin 33	Cytokine that binds to and signals through the IL1RL1/ST2 receptor which in turn activates NF-kappa-B and MAPK signaling pathways in target cells	8.89	30,759.38	IMMUNOLOGICAL	30759.4
The Human Protein Atlas	Apolipoprotein A1	Participates in the reverse transport of cholesterol from tissues to the liver for excretion by promoting cholesterol efflux from tissues and by acting as a cofactor for the lecithin cholesterol acyltransferase (LCAT). As part of the SPAP complex, activates spermatozoa motility.	4.56	30777.8	METABOLIC	30777.8
DOI: 10.1002./pmic.200300449	Apolipoprotein A-I	Participates in the reverse transport of cholesterol from tissues to the liver for excretion	5.56	30,777.83	CARRIER	30777.8
The Human Protein Atlas	Serpin family A member 9	Protease inhibitor that inhibits trypsin and trypsin-like serine proteases (in vitro). Inhibits plasmin and thrombin with lower efficiency (in vitro).	9.68	30,804.79	INHIBITOR	30804.8
The Human Protein Atlas	Chromosome 2 open reading frame 69	UNSPECIFIC	8.65	30,918.17	UNSPECIFIC	30918.2
The Human Protein Atlas	R-spondin 3	Activator of the canonical Wnt signaling pathway by acting as a ligand for LGR4-6 receptors, which acts as a key regulator of angiogenesis. Upon binding to LGR4-6 (LGR4, LGR5 or LGR6), LGR4-6 associate with phosphorylated LRP6 and frizzled receptors that are activated by extracellular Wnt receptors, triggering the canonical Wnt signaling pathway to increase expression of target genes.	9.53	30,928.66	ACTIVATOR	30928.7
The Human Protein Atlas	Serpin family A member 6	Major transport protein for glucocorticoids and progestins in the blood of almost all vertebrate species.	8.39	31,098.85	INHIBITOR	31098.8
The Human Protein Atlas	Colony stimulating factor 2 receptor subunit alpha	Low affinity receptor for granulocyte-macrophage colony-stimulating factor. Transduces a signal that results in the proliferation, differentiation, and functional activation of hematopoietic cells.	8.46	31,101.35	CELL CYCLE	31101.3
UNIPROT	Transcription factor PU.1	Pioneer transcription factor, which controls hematopoietic cell fate by decompacting stem cell heterochromatin and allowing other transcription factors to enter otherwise inaccessible genomic sites. Once in open chromatin, can directly control gene expression by binding genetic regulatory elements and can also more broadly influence transcription by recruiting transcription factors, such as inter…	6.30	31203.3	TRANSCRIPTION	31203.3
The Human Protein Atlas	TNF alpha induced protein 6	Possibly involved in cell-cell and cell-matrix interactions during inflammation and tumorigenesis.	6.3	31,203.34	INFLAMMATORY	31203.3
UNIPROT	Laminin subunit alpha-2	Binding to cells via a high affinity receptor, laminin is thought to mediate the attachment, migration and organization of cells into tissues during embryonic development by interacting with other extracellular matrix components.	5.01	31211.1	CELLULAR ORGANIZATION	31211.1
The Human Protein Atlas	Tryptase alpha/beta 1	Tryptase is the major neutral protease present in mast cells and is secreted upon the coupled activation-degranulation response of this cell type. May play a role in innate immunity. Isoform 2 cleaves large substrates, such as fibronectin, more efficiently than isoform 1, but seems less efficient toward small substrates	6.4	31,444.40	IMMUNOLOGICAL	31444.4
The Human Protein Atlas	Fas ligand	Cytokine that binds to TNFRSF6/FAS, a receptor that transduces the apoptotic signal into cells. Involved in cytotoxic T-cell-mediated apoptosis, natural killer cell-mediated apoptosis and in T-cell development	9.41	31,484.72	CELL DEATH	31484.7
The Human Protein Atlas	Interferon induced protein 35	Acts as a signaling pathway regulator involved in innate immune system response	5.75	31,514.35	BIOMARKER	31514.3
The Human Protein Atlas	Leukocyte immunoglobulin like receptor A5	May play a role in triggering innate immune responses. Does not seem to play a role for any class I MHC antigen recognition.	6.22	31,537.74	IMMUNOLOGICAL	31537.7
DOI: 10.1002./pmic.200300449	HLA class I histocompatibility antigen, A-3 alpha chain	Non-classical major histocompatibility class Ib molecule involved in immune self-nonself discrimination.	5.33	31,587.86	ADHESION	31587.9
The Human Protein Atlas	NAD(P)HX epimerase	Catalyzes the epimerization of the S- and R-forms of NAD(P)HX, a damaged form of NAD(P)H that is a result of enzymatic or heat-dependent hydration.	7.56	31,674.59	CATALYTIC ACTIVITY	31674.6
The Human Protein Atlas	Neuregulin 1	Direct ligand for ERBB3 and ERBB4 tyrosine kinase receptors. Concomitantly recruits ERBB1 and ERBB2 coreceptors, resulting in ligand-stimulated tyrosine phosphorylation and activation of the ERBB receptors.	4.69	31,711.88	SIGNAL	31711.9
The Human Protein Atlas	WD repeat domain 25	This gene encodes a protein containing 7 WD repeats. WD repeats are approximately 30 to 40-amino acid domains containing several conserved residues, typically having a Tryptophan-Aspartic acid dipeptide (WD) at the C-terminal end. WD domains are involved in protein-protein interactions in a variety of cellular processes, including cell cycle progression, signal transduction, apoptosis, and gene r…	8.64	32,165.69	CELL DEATH	32165.7
The Human Protein Atlas	Insulin like growth factor binding protein 3	IGF-binding proteins prolong the half-life of the IGFs and have been shown to either inhibit or stimulate the growth promoting effects of the IGFs on cell culture. They alter the interaction of IGFs with their cell surface receptors.	8.96	32,222.8	INHIBITOR	32222.8
The Human Protein Atlas	Secreted phosphoprotein 1	Major non-collagenous bone protein that binds tightly to hydroxyapatite. Appears to form an integral part of the mineralized matrix. Probably important to cell-matrix interaction.	4.35	32,355.3	OSTEOGENESIS	32355.3
The Human Protein Atlas	C1q and TNF related 12	Insulin-sensitizing adipocyte-secreted protein (adipokine) that regulates glucose metabolism in liver and adipose tissue. Promotes glucose uptake in adipocytes and suppresses de novo glucose production in hepatocytes via the PI3K-Akt signaling pathway.	9.41	32,415.98	CELL FUNCTION REGULATOR	32416
The Human Protein Atlas	Syndecan 1	Cell surface proteoglycan that bears both heparan sulfate and chondroitin sulfate and that links the cytoskeleton to the interstitial matrix. Regulates exosome biogenesis in concert with SDCBP and PDCD6IP	4.39	32,476.6	CELL FUNCTION REGULATOR	32476.6
UNIPROT	Nucleophosmin	Involved in diverse cellular processes such as ribosome biogenesis, centrosome duplication, protein chaperoning, histone assembly, cell proliferation, and regulation of tumor suppressors p53/TP53 and ARF. Binds ribosome presumably to drive ribosome nuclear export. Associated with nucleolar ribonucleoprotein structures and bind single-stranded nucleic acids. Acts as a chaperonin for the core histo…	4.63	32575	CELL FUNCTION REGULATOR	32575
UNIPROT	Trem-like transcript 1 protein	Cell surface receptor that may play a role in the innate and adaptive immune response.	4.7	32678.5	RECEPTOR	32678.5
The Human Protein Atlas	TNF receptor superfamily member 6b	Decoy receptor that can neutralize the cytotoxic ligands TNFS14/LIGHT, TNFSF15 and TNFSF6/FASL. Protects against apoptosis.	8.58	32679.6	RECEPTOR	32679.6
DOI: 10.1002./pmic.200300449	Ficolin 3	May function in innate immunity through activation of the lectin complement pathway.	6.2	32,902.98	IMMUNOLOGICAL	32903
The Human Protein Atlas	Fibrinogen alpha chain	Cleaved by the protease thrombin to yield monomers which, together with fibrinogen beta (FGB) and fibrinogen gamma (FGG), polymerize to form an insoluble fibrin matrix. Fibrin has a major function in hemostasis as one of the primary components of blood clots. In addition, functions during the early stages of wound repair to stabilize the lesion and guide cell migration during re-epithelialization…	8.57	32990.9	COAGULATION	32990.9
UNIPROT	Fibrinogen alpha chain	Cleaved by the protease thrombin to yield monomers which, together with fibrinogen beta (FGB) and fibrinogen gamma (FGG), polymerize to form an insoluble fibrin matrix. Fibrin has a major function in hemostasis as one of the primary components of blood clots. In addition, functions during the early stages of wound repair to stabilize the lesion and guide cell migration during re-epithelialization…	8.57	33005	COAGULATION	33005
DOI: 10.1002./pmic.200300449	Vascular endothelial growth factor receptor 3	Tyrosine-protein kinase that acts as a cell-surface receptor for VEGFC and VEGFD, and plays an essential role in adult lymphangiogenesis and in the development of the vascular network and the cardiovascular system during embryonic development. Promotes proliferation, survival and migration of endothelial cells, and regulates angiogenic sprouting.	4.86	33,018.35	VASO-REGULATORY	33018.3
The Human Protein Atlas	Kininogen 1	Kininogens are inhibitors of thiol proteases. HMW-kininogen plays an important role in blood coagulation by helping to position optimally prekallikrein and factor XI next to factor XII; HMW-kininogen inhibits the thrombin- and plasmin-induced aggregation of thrombocytes. LMW-kininogen inhibits the aggregation of thrombocytes. LMW-kininogen is in contrast to HMW-kininogen not involved in blood clo…	6.27	33055.3	INHIBITOR	33055.3
The Human Protein Atlas	Fibrinogen like 1	Immune suppressive molecule that inhibits antigen-specific T-cell activation by acting as a major ligand of LAG3 1. Responsible for LAG3 T-cell inhibitory function 2. Binds LAG3 independently from MHC class II (MHC-II) 3. Secreted by, and promotes growth of, hepatocytes	5.84	33093.7	INHIBITOR	33093.7
UNIPROT	ATP-binding cassette sub-family B member 6	ATP-dependent transporter that catalyzes the transport of a broad-spectrum of porphyrins from the cytoplasm to the extracellular space through the plasma membrane or into the vesicle lumen 1, 2, 3, 4. May also function as an ATP-dependent importer of porphyrins from the cytoplasm into the mitochondria, in turn may participate in the de novo heme biosynthesis regulation and in the coordination of …	5.26	33167.6	CATALYTIC ACTIVITY	33167.6
UNIPROT	Junctional adhesion molecule B	Junctional adhesion protein that mediates heterotypic cell-cell interactions with its cognate receptor JAM3 to regulate different cellular processes 1, 2, 3. Plays a role in homing and mobilization of hematopoietic stem and progenitor cells within the bone marrow 4. At the surface of bone marrow stromal cells, it contributes to the retention of the hematopoietic stem and progenitor cells expressi…	9.23	33206.9	CELL FUNCTION REGULATOR	33206.9
UNIPROT	Dehydrodolichyl diphosphate synthase complex subunit NUS1	With DHDDS, forms the dehydrodolichyl diphosphate synthase (DDS) complex, an essential component of the dolichol monophosphate (Dol-P) biosynthetic machinery. Both subunits contribute to enzymatic activity, i.e. condensation of multiple copies of isopentenyl pyrophosphate (IPP) to farnesyl pyrophosphate (FPP) to produce dehydrodolichyl diphosphate (Dedol-PP), a precursor of dolichol phosphate whi…	8.81	33224.3	ENZYME	33224.3
The Human Protein Atlas	Interleukin 15 receptor subunit alpha	In neutrophils, binds and activates kinase SYK in response to IL15 stimulation. In neutrophils, required for IL15-induced phagocytosis in a SYK-dependent manner	9.15	33,384.81	IMMUNOLOGICAL	33384.8
The Human Protein Atlas	Deoxyribonuclease 1 like 3	Has DNA hydrolytic activity.	8.75	33,554.7	TRANSCRIPTION	33554.7
The Human Protein Atlas	Interleukin 1 receptor type 2	Non-signaling receptor for IL1A, IL1B and IL1RN. Reduces IL1B activities. Serves as a decoy receptor by competetive binding to IL1B and preventing its binding to IL1R1. Also modulates cellular response through non-signaling association with IL1RAP after binding to IL1B.	8.41	33,621.6	RECEPTOR	33621.6
UNIPROT	Ficolin-2	May function in innate immunity through activation of the lectin complement pathway. Calcium-dependent and GlcNAc-binding lectin. Enhances phagocytosis of S.typhimurium by neutrophils, suggesting an opsonic effect via the collagen region.	6.31	34001.1	IMMUNOLOGICAL	34001.1
UNIPROT	Syntaxin-5	Mediates endoplasmic reticulum to Golgi transport. Together with p115/USO1 and GM130/GOLGA2, involved in vesicle tethering and fusion at the cis-Golgi membrane to maintain the stacked and inter-connected structure of the Golgi apparatus.	9	34086.1	CARRIER	34086.1
The Human Protein Atlas	Growth differentiation factor 15	Regulates food intake, energy expenditure and body weight in response to metabolic and toxin-induced stresses	9.79	34,140.22	METABOLIC	34140.2
DOI: 10.1002./pmic.200300449	Zinc-α-2 glycoprotein	Stimulates lipid degradation in adipocytes and causes the extensive fat losses associated with some advanced cancers. May bind polyunsaturated fatty acids.	5.71	34,258.72	BIOMARKER	34258.7
The Human Protein Atlas	Angiopoietin 1	Plays an important role in the regulation of angiogenesis, endothelial cell survival, proliferation, migration, adhesion and cell spreading, reorganization of the actin cytoskeleton, but also maintenance of vascular quiescence.	7.07	34,331.86	CELL CYCLE	34331.9
The Human Protein Atlas	C1q and TNF related 9	Probable adipokine. Activates AMPK, AKT, and p44/42 MAPK signaling pathways.	8.28	34,686.9	ACTIVATOR	34686.9
The Human Protein Atlas	Serpin family A member 1	Inhibitor of serine proteases. Its primary target is elastase, but it also has a moderate affinity for plasmin and thrombin. Irreversibly inhibits trypsin, chymotrypsin and plasminogen activator. The aberrant form inhibits insulin-induced NO synthesis in platelets, decreases coagulation time and has proteolytic activity against insulin and plasmin.	5.04	34,727.41	INHIBITOR	34727.4
The Human Protein Atlas	C1q and TNF related 2	Involved in the regulation of lipid metabolism in adipose tissue and liver.	9.07	34,833.49	CELL FUNCTION REGULATOR	34833.5
The Human Protein Atlas	Oncoprotein induced transcript 3	May be involved in hepatocellular function and development.	4.93	34,911.18	CELL FUNCTION REGULATOR	34911.2
The Human Protein Atlas	Intelectin 1	Lectin that specifically recognizes microbial carbohydrate chains in a calcium-dependent manner	5.51	34,977.63	INHIBITOR	34977.6
UNIPROT	Junctional adhesion molecule C	Junctional adhesion protein that mediates heterotypic cell-cell interactions with its cognate receptor JAM2 to regulate different cellular processes 1, 2. Plays a role in homing and mobilization of hematopoietic stem and progenitor cells within the bone marrow. At the surface of bone marrow stromal cells, it contributes to the retention of the hematopoietic stem and progenitor cells expressing JA…	7.53	35019.9	CELL FUNCTION REGULATOR	35019.9
The Human Protein Atlas	N-myc and STAT interactor	Acts as a signaling pathway regulator involved in innate immune system response	5.2	35,056.81	IMMUNOLOGICAL	35056.8
The Human Protein Atlas	Ficolin 1	Extracellular lectin functioning as a pattern-recognition receptor in innate immunity. Binds the sugar moieties of pathogen-associated molecular patterns (PAMPs) displayed on microbes and activates the lectin pathway of the complement system. May also activate monocytes through a G protein-coupled receptor, FFAR2, inducing the secretion of interleukin-8/IL-8 1. Binds preferentially to 9-O-acetyla…	6.39	35078.4	RECEPTOR	35078.4
The Human Protein Atlas	C1q and TNF related 3	Tumor necrosis factor-related protein	6.67	35,183.42	IMMUNOLOGICAL	35183.4
UNIPROT	Secreted frizzled-related protein 1	Soluble frizzled-related proteins (sFRPS) function as modulators of Wnt signaling through direct interaction with Wnts. They have a role in regulating cell growth and differentiation in specific cell types. SFRP1 decreases intracellular beta-catenin levels (By similarity). Has antiproliferative effects on vascular cells, in vitro and in vivo, and can induce, in vivo, an angiogenic response. In va…	9.1	35385.6	SIGNAL	35385.6
DOI: 10.1002./pmic.200300449	Apolipoprotein F	Minor apolipoprotein that associates with LDL. Inhibits cholesteryl ester transfer protein (CETP) activity and appears to be an important regulator of cholesterol transport.	5.42	35,399.49	INHIBITOR	35399.5
DOI: 10.1002./pmic.200300449	Annexin A13	[Isoform A]: Binds to membranes enriched in phosphatidylserine or phosphatidylglycerol in a calcium-dependent manner 1, 2. Half-maximal membrane binding requires about 60 uM calcium. Does not bind to membranes that lack phospholipids with an acidic headgroup	5.44	35,410.02	ADHESION	35410
The Human Protein Atlas	Complement C2	Component C2 which is part of the classical pathway of the complement system is cleaved by activated factor C1 into two fragments: C2b and C2a. C2a, a serine protease, then combines with complement factor C4b to generate the C3 or C5 convertase.	8.13	35,451.41	ACTIVATOR	35451.4
The Human Protein Atlas	Transforming growth factor beta 3	Transforming growth factor beta-3 proprotein: Precursor of the Latency-associated peptide (LAP) and Transforming growth factor beta-3 (TGF-beta-3) chains, which constitute the regulatory and active subunit of TGF-beta-3, respectively.	8.82	35,707.96	CELL FUNCTION REGULATOR	35708
The Human Protein Atlas	Spondin 2	Cell adhesion protein that promotes adhesion and outgrowth of hippocampal embryonic neurons. Binds directly to bacteria and their components and functions as an opsonin for macrophage phagocytosis of bacteria. Essential in the initiation of the innate immune response and represents a unique pattern-recognition molecule in the ECM for microbial pathogens (By similarity). Binds bacterial lipopolysa…	5.22	35,844.34	ADHESION	35844.3
DOI: 10.1002./pmic.200300449	Annexin V	This protein is an anticoagulant protein that acts as an indirect inhibitor of the thromboplastin-specific complex, which is involved in the blood coagulation cascade.	4.93	35,936.77	COAGULATION	35936.8
The Human Protein Atlas	Corticotropin releasing hormone binding protein	Binds CRF and inactivates it. May prevent inappropriate pituitary-adrenal stimulation in pregnancy.	6.06	36,144.35	INHIBITOR	36144.3
DOI: 10.1002./pmic.200300449	Apolipoprotein E	APOE is an apolipoprotein, a protein associating with lipid particles, that mainly functions in lipoprotein-mediated lipid transport between organs via the plasma and interstitial fluids	5.81	36,207.13	CARRIER	36207.1
UNIPROT	C1GALT1-specific chaperone 1	Probable chaperone required for the generation of 1 O-glycan Gal-beta1-3GalNAc-alpha1-Ser/Thr (T antigen), which is a precursor for many extended O-glycans in glycoproteins. Probably acts as a specific molecular chaperone assisting the folding/stability of core 1 beta-3-galactosyltransferase	6.35	36382	ADHESION	36382
The Human Protein Atlas	Complement C8 beta chain	Constituent of the membrane attack complex (MAC) that plays a key role in the innate and adaptive immune response by forming pores in the plasma membrane of target cells.	9.03	36441.6	IMMUNOLOGICAL	36441.6
The Human Protein Atlas	Dehydrogenase/reductase X-linked	Involved in the positive regulation of starvation-induced autophagy	9.34	36,461.24	CELL DEATH	36461.2
The Human Protein Atlas	Fc epsilon receptor II	Low-affinity receptor for immunoglobulin E (IgE) and CR2/CD21. Has essential roles in the regulation of IgE production and in the differentiation of B cells. On B cells, initiates IgE-dependent antigen uptake and presentation to T cells 1. On macrophages, upon IgE binding and antigen cross-linking induces intracellular killing of parasites through activation of L-Arginine-nitric oxide pathway 2.	5.38	36468.8	RECEPTOR	36468.8
The Human Protein Atlas	Fc fragment of IgE receptor II	Low-affinity receptor for immunoglobulin E (IgE) and CR2/CD21. Has essential roles in the regulation of IgE production and in the differentiation of B-cells (it is a B-cell-specific antigen).	5.38	36,468.78	ADHESION	36468.8
The Human Protein Atlas	Chromosome 1 open reading frame 56	Involved in control of cellular proliferation. Onconcogenic modifier contributing to the tumor suppressor function of DNMT3B.	8.96	36769.4	CELL CYCLE	36769.4
UNIPROT	CMP-sialic acid transporter	Transports CMP-sialic acid from the cytosol into the Golgi apparatus, functioning as an antiporter that exchanges CMP-sialic acid for CMP 1, 2, 3. Binds both CMP-sialic acid and free CMP, but has higher affinity for free CMP (By similarity). Also able to exchange CMP-sialic acid for AMP and UMP 4. Also mediates the transport of CDP-ribitol	9.11	36778.6	CARRIER	36778.6
The Human Protein Atlas	Fibrillin 2	[Fibrillin-2]: Fibrillins are structural components of 10-12 nm extracellular calcium-binding microfibrils, which occur either in association with elastin or in elastin-free bundles. Fibrillin-2-containing microfibrils regulate the early process of elastic fiber assembly. Regulates osteoblast maturation by controlling TGF-beta bioavailability and calibrating TGF-beta and BMP levels, respectively.	8.77	36796.2	STRUCTURAL	36796.2
UNIPROT	Urokinase plasminogen activator surface receptor	Acts as a receptor for urokinase plasminogen activator 1. Plays a role in localizing and promoting plasmin formation. Mediates the proteolysis-independent signal transduction activation effects of U-PA. It is subject to negative-feedback regulation by U-PA which cleaves it into an inactive form.	6.19	36977.9	RECEPTOR	36977.9
The Human Protein Atlas	MBL associated serine protease 2	Serum protease that plays an important role in the activation of the complement system via mannose-binding lectin. After activation by auto-catalytic cleavage it cleaves C2 and C4, leading to their activation and to the formation of C3 convertase.	5.44	37135.6	ACTIVATOR	37135.6
The Human Protein Atlas	Erythroferrone	Iron-regulatory hormone that acts as an erythroid regulator after hemorrhage: produced by erythroblasts following blood loss and mediates suppression of hepcidin (HAMP) expression in the liver, thereby promoting increased iron absorption and mobilization from stores.	9.88	37,278.89	HORMONE	37278.9
The Human Protein Atlas	Signal peptide, CUB domain and EGF like domain containing 1	Could function as an adhesive molecule and its matrix bound and soluble fragments may play a critical role in vascular biology.	5.39	37,305.73	ADHESION	37305.7
The Human Protein Atlas	Complement factor H related 4	Involved in complement regulation. Can associate with lipoproteins and may play a role in lipid metabolism.	5.14	37,325	CELL FUNCTION REGULATOR	37325
DOI: 10.1002./pmic.200300449	L-lactate dehydrogenase b chain	Interconverts simultaneously and stereospecifically pyruvate and lactate with concomitant interconversion of NADH and NAD+.	5.86	37405.6	CATALYTIC ACTIVITY	37405.6
DOI: 10.1002./pmic.200300449	Cathepsin S	Thiol protease. Key protease responsible for the removal of the invariant chain from MHC class II molecules and MHC class II antigen presentation	8.61	37,480.7	CATALYTIC ACTIVITY	37480.7
The Human Protein Atlas	Sialic acid binding Ig like lectin 6	Putative adhesion molecule that mediates sialic-acid dependent binding to cells. Binds to alpha-2,6-linked sialic acid. The sialic acid recognition site may be masked by cis interactions with sialic acids on the same cell surface.	6.39	37,607.76	ADHESION	37607.8
The Human Protein Atlas	Complement factor H related 1	Involved in complement regulation.	7.39	37,650.56	CELL FUNCTION REGULATOR	37650.6
The Human Protein Atlas	Fibrinogen gamma chain	Together with fibrinogen alpha (FGA) and fibrinogen beta (FGB), polymerizes to form an insoluble fibrin matrix. Has a major function in hemostasis as one of the primary components of blood clots. In addition, functions during the early stages of wound repair to stabilize the lesion and guide cell migration during re-epithelialization. Was originally thought to be essential for platelet aggregatio…	5.87	37738.1	COAGULATION	37738.1
The Human Protein Atlas	Tsukushi, small leucine rich proteoglycan	Contributes to various developmental events and other processes such as wound healing and cholesterol homeostasis through its interactions with multiple signaling pathways.	6.38	37,821.38	COAGULATION	37821.4
The Human Protein Atlas	Cathepsin B	Thiol protease which is believed to participate in intracellular degradation and turnover of proteins	5.88	37,821.58	METABOLIC	37821.6
The Human Protein Atlas	Thrombopoietin	Lineage-specific cytokine affecting the proliferation and maturation of megakaryocytes from their committed progenitor cells. It acts at a late stage of megakaryocyte development. It may be the major physiological regulator of circulating platelets.	9.54	37,822.78	CELL FUNCTION REGULATOR	37822.8
The Human Protein Atlas	Renalase, FAD dependent amine oxidase	Catalyzes the oxidation of the less abundant 1,2-dihydro-beta-NAD(P) and 1,6-dihydro-beta-NAD(P) to form beta-NAD(P)(+). The enzyme hormone is secreted by the kidney, and circulates in blood and modulates cardiac function and systemic blood pressure.	6.06	37,833.27	CATALYTIC ACTIVITY	37833.3
The Human Protein Atlas	C-X3-C motif chemokine ligand 1	The CX3CR1-CX3CL1 signaling exerts distinct functions in different tissue compartments, such as immune response, inflammation, cell adhesion and chemotaxis	5.48	38,055.65	SIGNAL	38055.7
The Human Protein Atlas	CD5 molecule like	Secreted protein that acts as a key regulator of lipid synthesis: mainly expressed by macrophages in lymphoid and inflamed tissues and regulates mechanisms in inflammatory responses, such as infection or atherosclerosis.	5.28	38,087.8	INHIBITOR	38087.8
UNIPROT	HLA class I histocompatibility antigen, alpha chain G	Antigen-presenting major histocompatibility complex class I (MHCI) molecule. In complex with B2M/beta 2 microglobulin displays primarily viral and tumor-derived peptides on antigen-presenting cells for recognition by alpha-beta T cell receptor (TCR) on HLA-A-restricted CD8-positive T cells, guiding antigen-specific T cell immune response to eliminate infected or transformed cells 1, 2, 3, 4, 5, 6…	5.46	38092.9	IMMUNOLOGICAL	38092.9
The Human Protein Atlas	Leucine rich alpha-2-glycoprotein 1	The leucine-rich repeat (LRR) family of proteins, including LRG1, have been shown to be involved in protein-protein interaction, signal transduction, and cell adhesion and development. LRG1 is expressed during granulocyte differentiation (O'Donnell et al., 2002).	6.45	38167.9	SIGNAL	38167.9
DOI: 10.1002./pmic.200300449	Leucine-rich α-2 glycoprotein	Acute phase type 1 secretory protein whose expression is regulated by acute phase response mediators.	6.45	38,177.91	INFLAMMATORY	38177.9
The Human Protein Atlas	Major histocompatibility complex, class I, G	[Isoform 1]: Non-classical major histocompatibility class Ib molecule involved in immune regulatory processes at the maternal-fetal interface	5.46	38,224.12	CELL FUNCTION REGULATOR	38224.1
The Human Protein Atlas	Inhibin subunit beta C	Inhibins and activins inhibit and activate, respectively, the secretion of follitropin by the pituitary gland. Inhibins/activins are involved in regulating a number of diverse functions such as hypothalamic and pituitary hormone secretion, gonadal hormone secretion, germ cell development and maturation, erythroid differentiation, insulin secretion, nerve cell survival, embryonic axial development…	6.66	38,237.86	INHIBITOR	38237.9
The Human Protein Atlas	NHL repeat containing 3	This gene encodes a protein containing NCL-1, HT2A and Lin-41 (NHL) family repeats. Mammalian NHL-repeat containing proteins may be involved in a variety of enzymatic processes, including protein modification through ubiquitination.	5.98	38,282.59	ENZYME	38282.6
The Human Protein Atlas	Apolipoprotein H	Binds to various kinds of negatively charged substances such as heparin, phospholipids, and dextran sulfate. May prevent activation of the intrinsic blood coagulation cascade by binding to phospholipids on the surface of damaged cells.	8.34	38,298.16	CARRIER	38298.2
The Human Protein Atlas	Milk fat globule EGF and factor V/VIII domain containing	Plays an important role in the maintenance of intestinal epithelial homeostasis and the promotion of mucosal healing.	8.54	38,343.61	COAGULATION	38343.6
DOI: 10.1002./pmic.200300449	Lumican	Leucine-rich small repeating proteoglycans; Belongs to the leucine-rich small proteoglycan.	6.16	38,398.95	CELL FUNCTION REGULATOR	38398.9
The Human Protein Atlas	Inhibin subunit beta E	Inhibins and activins inhibit and activate, respectively, the secretion of follitropin by the pituitary gland. Inhibins/activins are involved in regulating a number of diverse functions such as hypothalamic and pituitary hormone secretion, gonadal hormone secretion, germ cell development and maturation, erythroid differentiation, insulin secretion, nerve cell survival, embryonic axial development…	9.49	38,561.36	INHIBITOR	38561.4
The Human Protein Atlas	Annexin A2	Calcium-regulated membrane-binding protein whose affinity for calcium is greatly enhanced by anionic phospholipids.	7.57	38,575.99	ADHESION	38576
The Human Protein Atlas	Apolipoprotein L4	May participate in reverse cholesterol transport from peripheral cells to the liver (By similarity).	8.53	38,619.34	CARRIER	38619.3
UNIPROT	Annexin A1	Plays important roles in the innate immune response as effector of glucocorticoid-mediated responses and regulator of the inflammatory process. Has anti-inflammatory activity 1. Plays a role in glucocorticoid-mediated down-regulation of the early phase of the inflammatory response (By similarity). Contributes to the adaptive immune response by enhancing signaling cascades that are triggered by T-…	6.57	38714.2	IMMUNOLOGICAL	38714.2
The Human Protein Atlas	Annexin A1	Plays important roles in the innate immune response as effector of glucocorticoid-mediated responses and regulator of the inflammatory process. Has anti-inflammatory activity	6.57	38,714.25	IMMUNOLOGICAL	38714.2
The Human Protein Atlas	GC vitamin D binding protein	Involved in vitamin D transport and storage, scavenging of extracellular G-actin, enhancement of the chemotactic activity of C5 alpha for neutrophils in inflammation and macrophage activation.	5.36	38,797.45	ADHESION	38797.4
The Human Protein Atlas	Chromosome 17 open reading frame 56	Involved in control of cellular proliferation. Onconcogenic modifier contributing to the tumor suppressor function of DNMT3B.	6.16	38,850.23	CELL FUNCTION REGULATOR	38850.2
The Human Protein Atlas	Glycosyltransferase 1 domain containing 1	Predicted to enable glycosyltransferase activity. Located in cytosol.	5.67	38,893.48	ACTIVATOR	38893.5
UNIPROT	Protein Wnt-7a	Ligand for members of the frizzled family of seven transmembrane receptors that functions in the canonical Wnt/beta-catenin signaling pathway (By similarity). Plays an important role in embryonic development, including dorsal versus ventral patterning during limb development, skeleton development and urogenital tract development 1. Required for central nervous system (CNS) angiogenesis and blood-…	9.04	39004.9	SIGNAL	39004.9
The Human Protein Atlas	Haptoglobin-related protein	Primate-specific plasma protein associated with apolipoprotein L-I (apoL-I)-containing high-density lipoprotein (HDL).	6.41	39,007.51	IMMUNOLOGICAL	39007.5
DOI: 10.1002./pmic.200300449	Haptoglobin-related protein	Primate-specific plasma protein associated with apolipoprotein L-I (apoL-I)-containing high-density lipoprotein (HDL). This HDL particle, termed trypanosome lytic factor-1 (TLF-1), mediates human innate immune protection against many species of African trypanosomes. Binds hemoglobin with high affinity and may contribute to the clearance of cell-free hemoglobin to allow hepatic recycling of heme i…	6.41	39,007.51	IMMUNOLOGICAL	39007.5
The Human Protein Atlas	Platelet derived growth factor C	Growth factor that plays an essential role in the regulation of embryonic development, cell proliferation, cell migration, survival and chemotaxis. Potent mitogen and chemoattractant for cells of mesenchymal origin. Required for normal skeleton formation during embryonic development, especially for normal development of the craniofacial skeleton and for normal development of the palate. Required …	5.77	39,029.41	CELL CYCLE	39029.4
The Human Protein Atlas	Cellular communication network factor 3	Immediate-early protein playing a role in various cellular processes including proliferation, adhesion, migration, differentiation and survival	8.02	39,134.1	ADHESION	39134.1
UNIPROT	Solute carrier family 22 member 1	Electrogenic voltage-dependent transporter that mediates the transport of a variety of organic cations such as endogenous bioactive amines, cationic drugs and xenobiotics 1, 2, 3, 4, 5, 6, 7, 8, 9, 10, 11, 12, 13, 14, 15, 16. Functions as a pH- and Na(+)-independent, bidirectional transporter (By similarity). Cation cellular uptake or release is driven by the electrochemical potential (i.e. membr…	6.51	39223.7	CARRIER	39223.7
DOI: 10.1002./pmic.200300449	alpha-2-HS glycoprotein	Promotes endocytosis, possesses opsonic properties and influences the mineral phase of bone. Shows affinity for calcium and barium ions.	5.43	39,324.68	IMMUNOLOGICAL	39324.7
UNIPROT	Protein Wnt-7b	Ligand for members of the frizzled family of seven transmembrane receptors that functions in the canonical Wnt/beta-catenin signaling pathway 1. Required for normal fusion of the chorion and the allantois during placenta development (By similarity). Required for central nervous system (CNS) angiogenesis and blood-brain barrier regulation 2	9.11	39327.1	SIGNAL	39327.1
The Human Protein Atlas	Alpha 2-HS glycoprotein	Promotes endocytosis, possesses opsonic properties and influences the mineral phase of bone. Shows affinity for calcium and barium ions.	5.43	39411.8	CARRIER	39411.8
The Human Protein Atlas	CD44 molecule (Indian blood group)	Cell-surface receptor that plays a role in cell-cell interactions, cell adhesion and migration, helping them to sense and respond to changes in the tissue microenvironment	5.09	39,441.88	RECEPTOR	39441.9
The Human Protein Atlas	Growth differentiation factor 1	May mediate cell differentiation events during embryonic development.	9.27	39,573.92	CELL CYCLE	39573.9
The Human Protein Atlas	Nodal growth differentiation factor	Essential for mesoderm formation and axial patterning during embryonic development.	6.44	39,580.33	CELL CYCLE	39580.3
DOI: 10.1002./pmic.200300449	Serum paraoxonase 3	Has low activity towards the organophosphate paraxon and aromatic carboxylic acid esters.	5.24	39,607.49	IMMUNOLOGICAL	39607.5
The Human Protein Atlas	Inhibin subunit alpha	Inhibins and activins inhibit and activate, respectively, the secretion of follitropin by the pituitary gland.	8.29	39,669.69	INHIBITOR	39669.7
UNIPROT	Serum paraoxonase/arylesterase 1	Hydrolyzes the toxic metabolites of a variety of organophosphorus insecticides. Capable of hydrolyzing a broad spectrum of organophosphate substrates and lactones, and a number of aromatic carboxylic acid esters. Mediates an enzymatic protection of low density lipoproteins against oxidative modification and the consequent series of events leading to atheroma formation.	5.08	39731.3	METABOLIC	39731.3
The Human Protein Atlas	Paraoxonase 1	Hydrolyzes the toxic metabolites of a variety of organophosphorus insecticides. Capable of hydrolyzing a broad spectrum of organophosphate substrates and lactones, and a number of aromatic carboxylic acid esters. Mediates an enzymatic protection of low density lipoproteins against oxidative modification and the consequent series of events leading to atheroma formation.	5.08	39,731.31	ENZYME	39731.3
UNIPROT	IgG receptor FcRn large subunit p51	Cell surface receptor that transfers passive humoral immunity from the mother to the newborn. Binds to the Fc region of monomeric immunoglobulin gamma and mediates its selective uptake from milk 1, 2. IgG in the milk is bound at the apical surface of the intestinal epithelium. The resultant FcRn-IgG complexes are transcytosed across the intestinal epithelium and IgG is released from FcRn into blo…	6.09	39743.3	IMMUNOLOGICAL	39743.3
UNIPROT	C-X-C chemokine receptor type 4	Receptor for the C-X-C chemokine CXCL12/SDF-1 that transduces a signal by increasing intracellular calcium ion levels and enhancing MAPK1/MAPK3 activation 1, 2, 3, 4. Involved in the AKT signaling cascade 5. Plays a role in regulation of cell migration, e.g. during wound healing 6. Acts as a receptor for extracellular ubiquitin; leading to enhanced intracellular calcium ions and reduced cellular …	7.46	39745.5	RECEPTOR	39745.5
DOI: 10.1002./pmic.200300449	Serum paraoxonase	Capable of hydrolyzing lactones and a number of aromatic carboxylic acid esters. Has antioxidant activity. Is not associated with high density lipoprotein.	5.08	39,749.35	METABOLIC	39749.3
The Human Protein Atlas	CD14 molecule	Coreceptor for bacterial lipopolysaccharide	5.84	40,076.2	RECEPTOR	40076.2
DOI: 10.1002./pmic.200300449	Monocyte differentiation antigen CD14	Coreceptor for bacterial lipopolysaccharide	5.84	40,076.20	RECEPTOR	40076.2
The Human Protein Atlas	Endoplasmic reticulum aminopeptidase 2	Aminopeptidase that plays a central role in peptide trimming, a step required for the generation of most HLA class I-binding peptides.	6.73	40,088.35	CELLULAR ORGANIZATION	40088.3
The Human Protein Atlas	Major histocompatibility complex, class I, E	Non-classical major histocompatibility class Ib molecule involved in immune self-nonself discrimination. In complex with B2M/beta-2-microglobulin binds nonamer self-peptides derived from the signal sequence of classical MHC class Ia molecules (VL9 peptides)	5.6	40,156.71	CELLULAR ORGANIZATION	40156.7
The Human Protein Atlas	Chitinase 1	Degrades chitin, chitotriose and chitobiose. May participate in the defense against nematodes and other pathogens. Isoform 3 has no enzymatic activity.	6.91	40,238.56	ANTIMICROBIAL	40238.6
The Human Protein Atlas	Signaling lymphocytic activation molecule family member 1	Self-ligand receptor of the signaling lymphocytic activation molecule (SLAM) family. SLAM receptors triggered by homo-or heterotypic cell-cell interactions are modulating the activation and differentiation of a wide variety of immune cells and thus are involved in the regulation and interconnection of both innate and adaptive immune response.	9.56	40,291.9	ACTIVATOR	40291.9
The Human Protein Atlas	Acid phosphatase 3	Has lipid phosphatase activity and inactivates lysophosphatidic acid in seminal plasma.	5.65	40,443.36	CATALYTIC ACTIVITY	40443.4
The Human Protein Atlas	Vascular endothelial growth factor D	Growth factor active in angiogenesis, lymphangiogenesis and endothelial cell growth, stimulating their proliferation and migration and also has effects on the permeability of blood vessels. May function in the formation of the venous and lymphatic vascular systems during embryogenesis, and also in the maintenance of differentiated lymphatic endothelium in adults. Binds and activates VEGFR-2 (KDR/…	7.87	40,444.37	ACTIVATOR	40444.4
The Human Protein Atlas	Vasohibin 2	Tyrosine carboxypeptidase that removes the C-terminal tyrosine residue of alpha-tubulin, thereby regulating microtubule dynamics and function. Critical for spindle function and accurate chromosome segregation during mitosis since microtuble detyronisation regulates mitotic spindle length and postioning. Acts as an activator of angiogenesis: expressed in infiltrating mononuclear cells in the sprou…	10.02	40,449.84	INHIBITOR	40449.8
UNIPROT	Lactosylceramide 4-alpha-galactosyltransferase	Catalyzes the transfer of galactose from UDP-alpha-D-galactose to lactosylceramide/beta-D-galactosyl-(1->4)-beta-D-glucosyl-(1<->1)-ceramide(d18:1(4E)) to produce globotriaosylceramide/globoside Gb3Cer (d18:1(4E)) 1. Also able to transfer galactose to galactosylceramide/beta-D-Gal-(1<->1')-Cer 2. Globoside Gb3Cer is a glycosphingolipid of the globo serie, one of the major types of neutral root st…	9.16	40499.2	CATALYTIC ACTIVITY	40499.2
The Human Protein Atlas	Alpha-1-B glycoprotein	The protein encoded by this gene is a plasma glycoprotein of unknown function. The protein shows sequence similarity to the variable regions of some immunoglobulin supergene family member proteins.	5.5	40717.9	IMMUNOLOGICAL	40717.9
UNIPROT	Adenosine deaminase	Catalyzes the hydrolytic deamination of adenosine and 2-deoxyadenosine 1, 2, 3, 4, 5. Plays an important role in purine metabolism and in adenosine homeostasis. Modulates signaling by extracellular adenosine, and so contributes indirectly to cellular signaling events. Acts as a positive regulator of T-cell coactivation, by binding DPP4 6. Its interaction with DPP4 regulates lymphocyte-epithelial …	5.63	40764.4	CATALYTIC ACTIVITY	40764.4
The Human Protein Atlas	Glutaminyl-peptide cyclotransferase	Responsible for the biosynthesis of pyroglutamyl peptides. Has a bias against acidic and tryptophan residues adjacent to the N-terminal glutaminyl residue and a lack of importance of chain length after the second residue. Also catalyzes N-terminal pyroglutamate formation.	6.12	40,876.55	CATALYTIC ACTIVITY	40876.6
UNIPROT	Angiopoietin-related protein 4	Mediates inactivation of the lipoprotein lipase LPL, and thereby plays a role in the regulation of triglyceride clearance from the blood serum and in lipid metabolism 1, 2, 3, 4. May also play a role in regulating glucose homeostasis and insulin sensitivity (Probable). Inhibits proliferation, migration, and tubule formation of endothelial cells and reduces vascular leakage 5, 6. Upon heterologous…	9.33	40917.2	INHIBITOR	40917.2
The Human Protein Atlas	Apolipoprotein A5	Minor apolipoprotein mainly associated with HDL and to a lesser extent with VLDL. May also be associated with chylomicrons.	5.98	40,923.25	CARRIER	40923.2
UNIPROT	Myocyte-specific enhancer factor 2C	Transcription activator which binds specifically to the MEF2 element present in the regulatory regions of many muscle-specific genes. Controls cardiac morphogenesis and myogenesis, and is also involved in vascular development. Enhances transcriptional activation mediated by SOX18. Plays an essential role in hippocampal-dependent learning and memory by suppressing the number of excitatory synapses…	8.7	40948.2	ACTIVATOR	40948.2
UNIPROT	Serine/threonine-protein kinase Sgk2	Serine/threonine-protein kinase which is involved in the regulation of a wide variety of ion channels, membrane transporters, cell growth, survival and proliferation. Up-regulates Na(+) channels: SCNN1A/ENAC, K(+) channels: KCNA3/Kv1.3, KCNE1 and KCNQ1, amino acid transporter: SLC6A19, glutamate transporter: SLC1A6/EAAT4, glutamate receptors: GRIA1/GLUR1 and GRIK2/GLUR6, Na(+)/H(+) exchanger: SLC…	6.27	41174.8	CELL FUNCTION REGULATOR	41174.8
UNIPROT	Adhesion G protein-coupled receptor E2	Cell surface receptor that binds to the chondroitin sulfate moiety of glycosaminoglycan chains and promotes cell attachment. Promotes granulocyte chemotaxis, degranulation and adhesion. In macrophages, promotes the release of inflammatory cytokines, including IL8 and TNF. Signals probably through G-proteins. Is a regulator of mast cell degranulation	5.14	41390.3	RECEPTOR	41390.3
The Human Protein Atlas	Cartilage associated protein	Necessary for efficient 3-hydroxylation of fibrillar collagen prolyl residues.	5.6	41,432.97	CELLULAR ORGANIZATION	41433
UNIPROT	Lysosome-associated membrane glycoprotein 2	Lysosomal membrane glycoprotein which plays an important role in lysosome biogenesis, lysosomal pH regulation and autophagy 1, 2, 3, 4, 5, 6, 7. Acts as an important regulator of lysosomal lumen pH regulation by acting as a direct inhibitor of the proton channel TMEM175, facilitating lysosomal acidification for optimal hydrolase activity 8. Plays an important role in chaperone-mediated autophagy,…	5.35	41451	CELL FUNCTION REGULATOR	41451
The Human Protein Atlas	Growth differentiation factor 3	Growth factor involved in early embryonic development and adipose-tissue homeostasis.	8.38	41486.2	COAGULATION	41486.2
The Human Protein Atlas	Interleukin 11 receptor subunit alpha	Essential for the normal development of craniofacial bones and teeth. Restricts suture fusion and tooth number.	6.24	41,842.4	OSTEOGENESIS	41842.4
The Human Protein Atlas	Nicotinamide phosphoribosyltransferase	Catalyzes the condensation of nicotinamide with 5-phosphoribosyl-1-pyrophosphate to yield nicotinamide mononucleotide, an intermediate in the biosynthesis of NAD. It is the rate limiting component in the mammalian NAD biosynthesis pathway.	6.04	41,864.64	CATALYTIC ACTIVITY	41864.6
DOI: 10.1002./pmic.200300449	Mitogen-activated protein kinase 12	Part of a non-canonical MAPK signaling pathway	5.98	41,940.18	SIGNAL	41940.2
The Human Protein Atlas	Pentraxin 3	Plays a role in the regulation of innate resistance to pathogens, inflammatory reactions, possibly clearance of self-components and female fertility	4.94	42,018.63	INFLAMMATORY	42018.6
UNIPROT	CCN family member 1	Promotes cell proliferation, chemotaxis, angiogenesis and cell adhesion. Appears to play a role in wound healing by up-regulating, in skin fibroblasts, the expression of a number of genes involved in angiogenesis, inflammation and matrix remodeling including VEGA-A, VEGA-C, MMP1, MMP3, TIMP1, uPA, PAI-1 and integrins alpha-3 and alpha-5. CCN1-mediated gene regulation is dependent on heparin-bindi…	8.64	42026.6	ADHESION	42026.6
The Human Protein Atlas	Fetuin B	Protease inhibitor required for egg fertilization. Required to prevent premature zona pellucida hardening before fertilization, probably by inhibiting the protease activity of ASTL, a protease that mediates the cleavage of ZP2 and triggers zona pellucida hardening (By similarity)	6.46	42054.9	INHIBITOR	42054.9
UNIPROT	Guanine nucleotide-binding protein subunit alpha-11	Guanine nucleotide-binding proteins (G proteins) are involved as modulators or transducers in various transmembrane signaling systems 1. Acts as an activator of phospholipase C 2. Transduces FFAR4 signaling in response to long-chain fatty acids (LCFAs) 3. Together with GNAQ, required for heart development (By similarity).	5.51	42123.3	SIGNAL	42123.3
UNIPROT	Speckle-type POZ protein	Component of a cullin-RING-based BCR (BTB-CUL3-RBX1) E3 ubiquitin-protein ligase complex that mediates the ubiquitination of target proteins, leading most often to their proteasomal degradation. In complex with CUL3, involved in ubiquitination and proteasomal degradation of BRMS1, DAXX, PDX1/IPF1, GLI2 and GLI3. In complex with CUL3, involved in ubiquitination of MACROH2A1 and BMI1; this does not…	5.58	42132.4	INHIBITOR	42132.4
The Human Protein Atlas	Platelet derived growth factor D	Growth factor that plays an essential role in the regulation of embryonic development, cell proliferation, cell migration, survival and chemotaxis. Potent mitogen for cells of mesenchymal origin. Plays an important role in wound healing. Induces macrophage recruitment, increased interstitial pressure, and blood vessel maturation during angiogenesis. Can initiate events that lead to a mesangial pr…	8.42	42,166.61	CELL CYCLE	42166.6
UNIPROT	Glucocorticoid receptor	Receptor for glucocorticoids (GC) 1, 2. Has a dual mode of action: as a transcription factor that binds to glucocorticoid response elements (GRE), both for nuclear and mitochondrial DNA, and as a modulator of other transcription factors 3. Affects inflammatory responses, cellular proliferation and differentiation in target tissues. Involved in chromatin remodeling 4. Plays a role in rapid mRNA de…	4.72	42256.8	RECEPTOR	42256.8
The Human Protein Atlas	Chitinase 3 like 1	Carbohydrate-binding lectin with a preference for chitin. Has no chitinase activity. May play a role in tissue remodeling and in the capacity of cells to respond to and cope with changes in their environment.	8.69	42,625.47	STRUCTURAL	42625.5
The Human Protein Atlas	Serpin family B member 1	Neutrophil serine protease inhibitor that plays an essential role in the regulation of the innate immune response, inflammation and cellular homeostasis 1. Acts primarily to protect the cell from proteases released in the cytoplasm during stress or infection.	5.9	42,741.81	INHIBITOR	42741.8
The Human Protein Atlas	Serine protease 23	This gene encodes a conserved member of the trypsin family of serine proteases. Mouse studies found a decrease of mRNA levels of this gene after ovulation was induced.	9.46	43,001.25	TRANSCRIPTION	43001.2
DOI: 10.1002./pmic.200300449	Creatine kinase M	Reversibly catalyzes the transfer of phosphate between ATP and various phosphogens (e.g. creatine phosphate). Creatine kinase isoenzymes play a central role in energy transduction in tissues with large, fluctuating energy demands, such as skeletal muscle, heart, brain and spermatozoa.	6.63	43,046.08	CATALYTIC ACTIVITY	43046.1
UNIPROT	Metal cation symporter ZIP8	Electroneutral divalent metal cation:bicarbonate symporter of the plasma membrane mediating the cellular uptake of zinc and manganese, two divalent metal cations important for development, tissue homeostasis and immunity 1, 2, 3, 4, 5, 6. Transports an electroneutral complex composed of a divalent metal cation and two bicarbonate anions or alternatively a bicarbonate and a selenite anion 7, 8. Th…	5.99	43131.2	CELL FUNCTION REGULATOR	43131.2
The Human Protein Atlas	Fc mu receptor	High-affinity Fc receptor for immunoglobulin M (IgM), both secreted and membrane-bound IgM 1, 2, 3, 4. Primarily regulates IgM transport and homeostasis. In lymphoid cells, enables exocytosis of membrane-bound IgM on the plasma membrane as well as endocytosis of IgM-antigen complexes toward lysosomes for degradation. In mucosal epithelium, mediates retrotranscytosis of antigen-IgM complexes acros…	9.78	43146.5	RECEPTOR	43146.5
UNIPROT	Immunoglobulin mu Fc receptor	Functions as a receptor for the Fc fragment of IgA and IgM. Binds IgA and IgM with high affinity and mediates their endocytosis. May function in the immune response to microbes mediated by IgA and IgM.	9.7	43146.5	RECEPTOR	43146.5
The Human Protein Atlas	Selenoprotein P	Might be responsible for some of the extracellular antioxidant defense properties of selenium or might be involved in the transport of selenium. May supply selenium to tissues such as brain and testis.	7.74	43,174.63	CARRIER	43174.6
UNIPROT	NAD-dependent protein deacetylase sirtuin-2	NAD-dependent protein deacetylase, which deacetylates internal lysines on histone and alpha-tubulin as well as many other proteins such as key transcription factors 1, 2, 3, 4, 5, 6, 7, 8, 9, 10, 11, 12, 13, 14, 15, 16, 17, 18. Participates in the modulation of multiple and diverse biological processes such as cell cycle control, genomic integrity, microtubule dynamics, cell differentiation, meta…	5.22	43182.2	CELL FUNCTION REGULATOR	43182.2
UNIPROT	Leupaxin	Transcriptional coactivator for androgen receptor (AR) and serum response factor (SRF). Contributes to the regulation of cell adhesion, spreading and cell migration and acts as a negative regulator in integrin-mediated cell adhesion events. Suppresses the integrin-induced tyrosine phosphorylation of paxillin (PXN). May play a critical role as an adapter protein in the formation of the adhesion zo…	5.62	43332	ACTIVATOR	43332
The Human Protein Atlas	Chitinase 3 like 2	Lectin that binds chitooligosaccharides and other glycans with high affinity, but not heparin. Has no chitinase activity.	7.11	43,528.78	CELL FUNCTION REGULATOR	43528.8
DOI: 10.1002./pmic.200300449	Apoliprotein L1	May play a role in lipid exchange and transport throughout the body.	5.49	43,847.01	CARRIER	43847
UNIPROT	Heat shock protein beta-1	Small heat shock protein which functions as a molecular chaperone probably maintaining denatured proteins in a folding-competent state 1, 2. Plays a role in stress resistance and actin organization 3. Through its molecular chaperone activity may regulate numerous biological processes including the phosphorylation and the axonal transport of neurofilament proteins 4.	8.12	44049.6	CARRIER	44049.6
UNIPROT	Guanine nucleotide-binding protein subunit alpha-13	Guanine nucleotide-binding proteins (G proteins) are involved as modulators or transducers in various transmembrane signaling systems 1, 2, 3, 4. Activates effector molecule RhoA by binding and activating RhoGEFs (ARHGEF1/p115RhoGEF, ARHGEF11/PDZ-RhoGEF and ARHGEF12/LARG) 5, 6. GNA13-dependent Rho signaling subsequently regulates transcription factor AP-1 (activating protein-1) (By similarity). P…	8.12	44049.6	SIGNAL	44049.6
The Human Protein Atlas	Collagen like tail subunit of asymmetric acetylcholinesterase	Anchors the catalytic subunits of asymmetric AChE to the synaptic basal lamina.	8.67	44,243.2	ENZYME	44243.2
The Human Protein Atlas	Transforming growth factor beta 1	Transforming growth factor beta-1 proprotein: Precursor of the Latency-associated peptide (LAP) and Transforming growth factor beta-1 (TGF-beta-1) chains, which constitute the regulatory and active subunit of TGF-beta-1, respectively.	8.83	44,341.16	CELL FUNCTION REGULATOR	44341.2
The Human Protein Atlas	Cathepsin D	Acid protease active in intracellular protein breakdown. Plays a role in APP processing following cleavage and activation by ADAM30 which leads to APP degradation	6.1	44,552.22	METABOLIC	44552.2
The Human Protein Atlas	Bone morphogenetic protein 2	Induces cartilage and bone formation	9.05	44,632.77	OSTEOGENESIS	44632.8
The Human Protein Atlas	Protein Z, vitamin K dependent plasma glycoprotein	Appears to assist hemostasis by binding thrombin and promoting its association with phospholipid vesicles. Inhibits activity of the coagulation protease factor Xa in the presence of SERPINA10, calcium and phospholipids.	5.64	44,743.9	COAGULATION	44743.9
The Human Protein Atlas	Transcobalamin 2	Primary vitamin B12-binding and transport protein. Delivers cobalamin to cells.	6.49	44,762.6	ADHESION	44762.6
The Human Protein Atlas	Bone morphogenetic protein 8b	Induces cartilage and bone formation. May be the osteoinductive factor responsible for the phenomenon of epithelial osteogenesis. Plays a role in calcium regulation and bone homeostasis (By similarity).	8.76	44,768.48	OSTEOGENESIS	44768.5
The Human Protein Atlas	Bone morphogenetic protein 8a	Induces cartilage and bone formation. May be the osteoinductive factor responsible for the phenomenon of epithelial osteogenesis. Plays a role in calcium regulation and bone homeostasis (By similarity).	8.97	44,779.45	OSTEOGENESIS	44779.4
UNIPROT	Phosphatidylcholine-sterol acyltransferase	Central enzyme in the extracellular metabolism of plasma lipoproteins. Synthesized mainly in the liver and secreted into plasma where it converts cholesterol and phosphatidylcholines (lecithins) to cholesteryl esters and lysophosphatidylcholines on the surface of high and low density lipoproteins (HDLs and LDLs) 1, 2, 3. The cholesterol ester is then transported back to the liver. Has a preferenc…	5.71	44960.7	ENZYME	44960.7
The Human Protein Atlas	Renin	Renin is a highly specific endopeptidase, whose only known function is to generate angiotensin I from angiotensinogen in the plasma, initiating a cascade of reactions that produce an elevation of blood pressure and increased sodium retention by the kidney.	6.61	45057.5	VASO-REGULATORY	45057.5
The Human Protein Atlas	Serpin family E member 1	Serine protease inhibitor. Inhibits TMPRSS7 1. Is a primary inhibitor of tissue-type plasminogen activator (PLAT) and urokinase-type plasminogen activator (PLAU). As PLAT inhibitor, it is required for fibrinolysis down-regulation and is responsible for the controlled degradation of blood clots	6.54	45,059.98	INHIBITOR	45060
The Human Protein Atlas	Growth differentiation factor 11	Secreted signal that acts globally to specify positional identity along the anterior/posterior axis during development. May play critical roles in patterning both mesodermal and neural tissues and in establishing the skeletal pattern (By similarity).	8.16	45,090.78	CELL CYCLE	45090.8
The Human Protein Atlas	Inhibin subunit beta B	Inhibins and activins inhibit and activate, respectively, the secretion of follitropin by the pituitary gland. Inhibins/activins are involved in regulating a number of diverse functions such as hypothalamic and pituitary hormone secretion, gonadal hormone secretion, germ cell development and maturation, erythroid differentiation, insulin secretion, nerve cell survival, embryonic axial development…	8.35	45,121.6	INHIBITOR	45121.6
DOI: 10.1002./pmic.200300449	Corticosteroid binding globulin	Major transport protein for glucocorticoids and progestins in the blood of almost all vertebrate species.	5.64	45,124.87	CARRIER	45124.9
The Human Protein Atlas	Haptoglobin	As a result of hemolysis, hemoglobin is found to accumulate in the kidney and is secreted in the urine. Haptoglobin captures, and combines with free plasma hemoglobin to allow hepatic recycling of heme iron and to prevent kidney damage.	6.13	45,205.31	CARRIER	45205.3
The Human Protein Atlas	Angiopoietin like 4	Mediates inactivation of the lipoprotein lipase LPL, and thereby plays a role in the regulation of triglyceride clearance from the blood serum and in lipid metabolism	9.07	45,214.09	CELL FUNCTION REGULATOR	45214.1
DOI: 10.1002./pmic.200300449	Semenogelin l protein	Predominant protein in semen. It participates in the formation of a gel matrix entrapping the accessory gland secretions and ejaculated spermatozoa.	9.3	45,293.51	CELL CYCLE	45293.5
The Human Protein Atlas	Sphingomyelin phosphodiesterase acid like 3B	Lipid-modulating phosphodiesterase. Active on the surface of macrophages and dendritic cells and strongly influences macrophage lipid composition and membrane fluidity. Acts as a negative regulator of Toll-like receptor signaling (By similarity). Has in vitro phosphodiesterase activity, but the physiological substrate is unknown	5.12	45,314.66	CELL FUNCTION REGULATOR	45314.7
The Human Protein Atlas	Apolipoprotein A4	May have a role in chylomicrons and VLDL secretion and catabolism. Required for efficient activation of lipoprotein lipase by ApoC-II; potent activator of LCAT. Apoa-IV is a major component of HDL and chylomicrons.	5.23	45335	SECRETOR	45335
DOI: 10.1002./pmic.200300449	Apolipoprotein A-IV	May have a role in chylomicrons and VLDL secretion and catabolism. Required for efficient activation of lipoprotein lipase by ApoC-II; potent activator of LCAT. Apoa-IV is a major component of HDL and chylomicrons.	5.23	45,335.02	SECRETOR	45335
DOI: 10.1002./pmic.200300449	Plasma serine protease inhibitor preproprotein	Heparin-dependent serine protease inhibitor that acts in body fluids and secretions.	9.3	45,674.68	INHIBITOR	45674.7
The Human Protein Atlas	Serpin family A member 5	Heparin-dependent serine protease inhibitor acting in body fluids and secretions. Inactivates serine proteases by binding irreversibly to their serine activation site. Involved in the regulation of intravascular and extravascular proteolytic activities. Plays hemostatic roles in the blood plasma. Acts as a procoagulant and proinflammatory factor by inhibiting the anticoagulant activated protein C…	9.3	45,702.73	INHIBITOR	45702.7
The Human Protein Atlas	Prenylcysteine oxidase 1 like	Probable oxidoreductase.	6.35	45,707.27	ENZYME	45707.3
DOI: 10.1002./pmic.200300449	Extracellular matrix protein 1	Involved in endochondral bone formation as negative regulator of bone mineralization. Stimulates the proliferation of endothelial cells and promotes angiogenesis. Inhibits MMP9 proteolytic activity.	5.94	46,129.52	OSTEOGENESIS	46129.5
UNIPROT	Thyroxine-binding globulin	There are three proteins including thyroxine-binding globulin (TBG), transthyretin and albumin responsible for carrying the thyroid hormones thyroxine (T4) and 3,5,3'-triiodothyronine (T3) in the bloodstream. This gene encodes the major thyroid hormone transport protein, TBG, in serum. It belongs to the serpin family in genomics, but the protein has no inhibitory function like many other members …	5.87	46324.5	CARRIER	46324.5
The Human Protein Atlas	Serpin family A member 7	Major thyroid hormone transport protein in serum.	5.85	46,324.5	INHIBITOR	46324.5
UNIPROT	Glucose-6-phosphate exchanger SLC37A4	This gene regulates glucose-6-phosphate transport from the cytoplasm to the lumen of the endoplasmic reticulum, in order to maintain glucose homeostasis. It also plays a role in ATP-mediated calcium sequestration in the lumen of the endoplasmic reticulum. Mutations in this gene have been associated with various forms of glycogen storage disease. Alternative splicing in this gene results in multip…	8.85	46360.1	CARRIER	46360.1
The Human Protein Atlas	Serpin family F member 1	Neurotrophic protein; induces extensive neuronal differentiation in retinoblastoma cells. Potent inhibitor of angiogenesis. As it does not undergo the S (stressed) to R (relaxed) conformational transition characteristic of active serpins, it exhibits no serine protease inhibitory activity.	5.97	46,370.35	INHIBITOR	46370.3
DOI: 10.1002./pmic.200300453	Fumarilacetoacetasa	Catalyses the hydrolytic cleavage of a carbon-carbon bond in fumarylacetoacetate to yield fumarate and acetoacetate as the final step in phenylalanine and tyrosine degradation https://www.ebi.ac.uk/interpro/entry/InterPro/IPR005959/	6.46	46,374.32	CATALYTIC ACTIVITY	46374.3
The Human Protein Atlas	Hyaluronidase 3	Facilitates sperm penetration into the layer of cumulus cells surrounding the egg by digesting hyaluronic acid. Involved in induction of the acrosome reaction in the sperm.	8.55	46,527.05	CELL CYCLE	46527.1
UNIPROT	Serine/threonine-protein kinase Kist	Upon serum stimulation, phosphorylates CDKN1B/p27Kip1, thus controlling CDKN1B subcellular location and cell cycle progression in G1 phase. May be involved in trafficking and/or processing of RNA (By similarity).	5.59	46546.3	CELL CYCLE	46546.3
UNIPROT	Mannose-6-phosphate isomerase	Isomerase that catalyzes the interconversion of fructose-6-P and mannose-6-P and has a critical role in the supply of D-mannose derivatives required for many eukaryotic glycosylation reactions.	5.62	46655.9	CATALYTIC ACTIVITY	46655.9
UNIPROT	Alpha-1-antitrypsin	Inhibitor of serine proteases. Its primary target is elastase, but it also has a moderate affinity for plasmin and thrombin. Irreversibly inhibits trypsin, chymotrypsin and plasminogen activator. The aberrant form inhibits insulin-induced NO synthesis in platelets, decreases coagulation time and has proteolytic activity against insulin and plasmin.	5.37	46736.6	INHIBITOR	46736.6
The Human Protein Atlas	Vascular endothelial growth factor C	Growth factor active in angiogenesis, and endothelial cell growth, stimulating their proliferation and migration and also has effects on the permeability of blood vessels. May function in angiogenesis of the venous and lymphatic vascular systems during embryogenesis, and also in the maintenance of differentiated lymphatic endothelium in adults. Binds and activates KDR/VEGFR2 and FLT4/VEGFR3 recep…	7.77	46,883.37	CELL CYCLE	46883.4
The Human Protein Atlas	Serpin family A member 11	Protease inhibitor, Serine protease inhibitor	7.25	46989.2	INHIBITOR	46989.2
The Human Protein Atlas	Granulin precursor	Secreted protein that acts as a key regulator of lysosomal function and as a growth factor involved in inflammation, wound healing and cell proliferation	6.75	46,990.75	SECRETOR	46990.8
The Human Protein Atlas	Neuronal pentraxin 2	Likely to play role in the modification of cellular properties that underlie long-term plasticity. Binds to agar matrix in a calcium-dependent manner (By similarity).	5.45	47,041.55	CELL FUNCTION REGULATOR	47041.6
DOI: 10.1002./pmic.200300449	Apolipoprotein L5	May affect the movement of lipids in the cytoplasm or allow the binding of lipids to organelles.	9.39	47,044.03	ADHESION	47044
DOI: 10.1002./pmic.200300449	Gamma-enolase	Has neurotrophic and neuroprotective properties on a broad spectrum of central nervous system (CNS) neurons. Binds, in a calcium-dependent manner, to cultured neocortical neurons and promotes cell survival (By similarity).	4.91	47,268.58	CATALYTIC ACTIVITY	47268.6
UNIPROT	Aspartate aminotransferase, cytoplasmic	Biosynthesis of L-glutamate from L-aspartate or L-cysteine 1. Important regulator of levels of glutamate, the major excitatory neurotransmitter of the vertebrate central nervous system. Acts as a scavenger of glutamate in brain neuroprotection. The aspartate aminotransferase activity is involved in hepatic glucose synthesis during development and in adipocyte glyceroneogenesis. Using L-cysteine a…	6.56	47305	CELL FUNCTION REGULATOR	47305
The Human Protein Atlas	Growth differentiation factor 2	Potent circulating inhibitor of angiogenesis. Signals through the type I activin receptor ACVRL1 but not other Alks. Signaling through SMAD1 in endothelial cells requires TGF-beta coreceptor endoglin/ENG.	6.02	47,320.46	CELL CYCLE	47320.5
The Human Protein Atlas	Carboxypeptidase A3	Metalloprotease that could be involved in the histone hyperacetylation pathway	6.38	47,379.37	TRANSCRIPTION	47379.4
The Human Protein Atlas	Inhibin subunit beta A	Inhibins and activins inhibit and activate, respectively, the secretion of follitropin by the pituitary gland. Inhibins/activins are involved in regulating a number of diverse functions such as hypothalamic and pituitary hormone secretion, gonadal hormone secretion, germ cell development and maturation, erythroid differentiation, insulin secretion, nerve cell survival, embryonic axial development…	8.3	47,442.27	INHIBITOR	47442.3
The Human Protein Atlas	Ectonucleoside triphosphate diphosphohydrolase 6	Catalyzes the hydrolysis of nucleoside triphosphates and diphosphates in a calcium-or magnesium-dependent manner.	8.82	47,563.29	CATALYTIC ACTIVITY	47563.3
DOI: 10.1002./pmic.200300449	Coagulation factor IX	Factor Xa is a vitamin K-dependent glycoprotein that converts prothrombin to thrombin in the presence of factor Va, calcium and phospholipid during blood clotting.	5.79	47,617.94	COAGULATION	47617.9
The Human Protein Atlas	Colony stimulating factor 1	Cytokine that plays an essential role in the regulation of survival, proliferation and differentiation of hematopoietic precursor cells, especially mononuclear phagocytes, such as macrophages and monocytes.	4.82	47,842.81	CELL CYCLE	47842.8
DOI: 10.1002./pmic.200300449	Kininogen	Kininogens are inhibitors of thiol proteases. Kininogen plays an important role in blood coagulation by helping to position optimally prekallikrein and factor XI next to factor XII; (3) HMW-kininogen inhibits the thrombin- and plasmin- induced aggregation of thrombocytes	6.29	47,883.21	COAGULATION	47883.2
DOI: 10.1002./pmic.200300449	Procollagen C-endopeptidase enhancer	Binds to the C-terminal propeptide of type I procollagen and enhances procollagen C-proteinase activity.	7.41	47972.5	ADHESION	47972.5
The Human Protein Atlas	Bone morphogenetic protein 10	Required for maintaining the proliferative activity of embryonic cardiomyocytes by preventing premature activation of the negative cell cycle regulator CDKN1C/p57KIP and maintaining the required expression levels of cardiogenic factors such as MEF2C and NKX2-5.	4.89	48,047.37	OSTEOGENESIS	48047.4
The Human Protein Atlas	Transcobalamin 1	Binds vitamin B12 with femtomolar affinity and protects it from the acidic environment of the stomach.	4.96	48,206.7	ADHESION	48206.7
UNIPROT	B-cell linker protein	Functions as a central linker protein, downstream of the B-cell receptor (BCR), bridging the SYK kinase to a multitude of signaling pathways and regulating biological outcomes of B-cell function and development. Plays a role in the activation of ERK/EPHB2, MAP kinase p38 and JNK. Modulates AP1 activation. Important for the activation of NF-kappa-B and NFAT. Plays an important role in BCR-mediated…	7.21	48228.9	ACTIVATOR	48228.9
The Human Protein Atlas	Plasminogen activator, urokinase	Specifically cleaves the zymogen plasminogen to form the active enzyme plasmin.	8.78	48,507.42	COAGULATION	48507.4
The Human Protein Atlas	Serpin family A member 4	Inhibits human amidolytic and kininogenase activities of tissue kallikrein. Inhibition is achieved by formation of an equimolar, heat- and SDS-stable complex between the inhibitor and the enzyme, and generation of a small C-terminal fragment of the inhibitor due to cleavage at the reactive site by tissue kallikrein.	7.34	48,541.97	INHIBITOR	48542
DOI: 10.1002./pmic.200300449	Kallistatin	Inhibits human amidolytic and kininogenase activities of tissue kallikrein. Inhibition is achieved by formation of an equimolar	7.34	48,555.99	INHIBITOR	48556
The Human Protein Atlas	CD48 molecule	Glycosylphosphatidylinositol (GPI)-anchored cell surface glycoprotein that interacts via its N-terminal immunoglobulin domain with cell surface receptors including 2B4/CD244 or CD2 to regulate immune cell function and activation 1, 2. Participates in T-cell signaling transduction by associating with CD2 and efficiently bringing the Src family protein kinase LCK and LAT to the TCR/CD3 complex 3. I…	6.48	48702.3	SIGNAL	48702.3
UNIPROT	Serine/threonine-protein kinase Sgk1	Serine/threonine-protein kinase which is involved in the regulation of a wide variety of ion channels, membrane transporters, cellular enzymes, transcription factors, neuronal excitability, cell growth, proliferation, survival, migration and apoptosis. Plays an important role in cellular stress response. Contributes to regulation of renal Na(+) retention, renal K(+) elimination, salt appetite, ga…	8.7	48942.4	CELL FUNCTION REGULATOR	48942.4
The Human Protein Atlas	SPARC (osteonectin), cwcv and kazal like domains proteoglycan 1	May play a role in cell-cell and cell-matrix interactions. May contribute to various neuronal mechanisms in the central nervous system.	5.74	49,124.26	INHIBITOR	49124.3
The Human Protein Atlas	Bone morphogenetic protein 7	Growth factor of the TGF-beta superfamily that plays important role in various biological processes, including embryogenesis, hematopoiesis, neurogenesis and skeletal morphogenesis	7.65	49,312.95	CELL CYCLE	49312.9
The Human Protein Atlas	CD55 molecule (cromer blood group)	This protein recognizes C4b and C3b fragments that condense with cell-surface hydroxyl or amino groups when nascent C4b and C3b are locally generated during C4 and c3 activation.	9.13	49,338.42	METABOLIC	49338.4
The Human Protein Atlas	Peptidase inhibitor 16	May inhibit cardiomyocyte growth.	5.24	49,471.05	INHIBITOR	49471.1
The Human Protein Atlas	C-type lectin domain family 18 member C	Binds polysaccharidesin a Ca(2+)-independent manner with a preferentially binding to fucoidan, beta-glucans and galactans.	8.39	49,549.3	ADHESION	49549.3
UNIPROT	Tissue alpha-L-fucosidase	Alpha-L-fucosidase is responsible for hydrolyzing the alpha-1,6-linked fucose joined to the reducing-end N-acetylglucosamine of the carbohydrate moieties of glycoproteins.	6.37	49577.9	ENZYME	49577.9
The Human Protein Atlas	Lecithin-cholesterol acyltransferase	Central enzyme in the extracellular metabolism of plasma lipoproteins. Synthesized mainly in the liver and secreted into plasma where it converts cholesterol and phosphatidylcholines (lecithins) to cholesteryl esters and lysophosphatidylcholines on the surface of high and low density lipoproteins (HDLs and LDLs)	5.71	49,577.92	CATALYTIC ACTIVITY	49577.9
The Human Protein Atlas	Serpin family G member 1	Activation of the C1 complex is under control of the C1-inhibitor. It forms a proteolytically inactive stoichiometric complex with the C1r or C1s proteases. May play a potentially crucial role in regulating important physiological pathways including complement activation, blood coagulation, fibrinolysis and the generation of kinins. Very efficient inhibitor of FXIIa. Inhibits chymotrypsin and kal…	6.08	49,757.09	ACTIVATOR	49757.1
The Human Protein Atlas	Phospholipase A2 group VII	Lipoprotein-associated calcium-independent phospholipase A2 involved in phospholipid catabolism during inflammatory and oxidative stress response	6.96	50,030.33	STRUCTURAL	50030.3
The Human Protein Atlas	Nucleobindin 2	Calcium-binding protein which may have a role in calcium homeostasis (By similarity). Acts as a non-receptor guanine nucleotide exchange factor which binds to and activates guanine nucleotide-binding protein (G-protein) alpha subunit GNAI3 (By similarity).	5	50,223.71	ADHESION	50223.7
The Human Protein Atlas	C-type lectin domain family 18 member B	Binds polysaccharides in a Ca(2+)-independent manner (By similarity).	8.21	50,478.44	ADHESION	50478.4
The Human Protein Atlas	C-type lectin domain family 18 member A	Binds polysaccharides in a Ca(2+)-independent manner with a preferentially binding to fucoidan, beta-glucans and galactans	8.37	50,478.51	ADHESION	50478.5
The Human Protein Atlas	Transforming growth factor beta 2	Transforming growth factor beta-2 proprotein: Precursor of the Latency-associated peptide (LAP) and Transforming growth factor beta-2 (TGF-beta-2) chains, which constitute the regulatory and active subunit of TGF-beta-2, respectively.	8.74	50,573.08	CELL FUNCTION REGULATOR	50573.1
The Human Protein Atlas	Growth differentiation factor 6	Growth factor that controls proliferation and cellular differentiation in the retina and bone formation. Plays a key role in regulating apoptosis during retinal development.	9.1	50,661.61	CELL CYCLE	50661.6
The Human Protein Atlas	Serpin family A member 10	Inhibits activity of the coagulation protease factor Xa in the presence of PROZ, calcium and phospholipids. Also inhibits factor XIa in the absence of cofactors.	8.28	50,706.96	COAGULATION	50707
DOI: 10.1002./pmic.200300449	Protein Z-dependent protease inhibitor	Inhibits activity of the coagulation protease factor Xa in the presence of PROZ, calcium and phospholipids. Also inhibits factor XIa in the absence of cofactors	8.58	50,718.97	COAGULATION	50719
The Human Protein Atlas	Lipase H	Hydrolyzes specifically phosphatidic acid (PA) to produce 2-acyl lysophosphatidic acid (LPA; a potent bioactive lipid mediator) and fatty acid.	7.15	50,859.34	CARRIER	50859.3
DOI: 10.1002./pmic.200300449	Complement factor H	Glycoprotein that plays an essential role in maintaining a well-balanced immune response by modulating complement activation. Acts as a soluble inhibitor of complement, where its binding to self markers such as glycan structures prevents complement activation	6.77	51033.8	CELL FUNCTION REGULATOR	51033.8
UNIPROT	RAC-beta serine/threonine-protein kinase	Serine/threonine kinase closely related to AKT1 and AKT3. All 3 enzymes, AKT1, AKT2 and AKT3, are collectively known as AKT kinase. AKT regulates many processes including metabolism, proliferation, cell survival, growth and angiogenesis, through the phosphorylation of a range of downstream substrates. Over 100 substrates have been reported so far, although for most of them, the precise AKT kinase…	6.41	51083.4	CELL FUNCTION REGULATOR	51083.4
UNIPROT	Cyclic GMP-AMP phosphodiesterase SMPDL3A	Cyclic-nucleotide phosphodiesterase that acts as a negative regulator of innate immunity by mediating degradation of 2',3'-cGAMP, thereby inhibiting the cGAS-STING signaling 1. Specifically linearizes 2',3'-cGAMP into 2'5'-bond pGpA and further hydrolyzes pGpA to produce GpA 2. Also has in vitro nucleotide phosphodiesterase activity with nucleoside triphosphates, such as ATP 3, 4. Has in vitro ac…	5.88	51260.4	INHIBITOR	51260.4
The Human Protein Atlas	Sphingomyelin phosphodiesterase acid like 3A	Has in vitro nucleotide phosphodiesterase activity with nucleoside triphosphates, such as ATP. Has in vitro activity with p-nitrophenyl-TMP. Has lower activity with nucleoside diphosphates, and no activity with nucleoside monophosphates	5.88	51,260.4	CELL FUNCTION REGULATOR	51260.4
The Human Protein Atlas	Complement factor properdin	A positive regulator of the alternate pathway (AP) of complement	8.32	51276.4	CELL FUNCTION REGULATOR	51276.4
The Human Protein Atlas	HtrA serine peptidase 1	Regulates the availability of insulin-like growth factors (IGFs) by cleaving IGF-binding proteins. Inhibits signaling mediated by TGF-beta family members.	8.09	51,286.95	INHIBITOR	51286.9
UNIPROT	B-lymphocyte antigen CD19	Functions as a coreceptor for the B-cell antigen receptor complex (BCR) on B-lymphocytes. Decreases the threshold for activation of downstream signaling pathways and for triggering B-cell responses to antigens 1, 2, 3. Activates signaling pathways that lead to the activation of phosphatidylinositol 3-kinase and the mobilization of intracellular Ca(2+) stores 4, 5, 6, 7. Is not required for early …	4.79	51392.3	RECEPTOR	51392.3
UNIPROT	Interleukin-6 receptor subunit alpha	Part of the receptor for interleukin 6. Binds to IL6 with low affinity, but does not transduce a signal 1. Signal activation necessitate an association with IL6ST. Activation leads to the regulation of the immune response, acute-phase reactions and hematopoiesis 2, 3. The interaction with membrane-bound IL6R and IL6ST stimulates 'classic signaling', the restricted expression of the IL6R limits cl…	8.56	51547.5	IMMUNOLOGICAL	51547.5
The Human Protein Atlas	Interleukin 6 receptor	Part of the receptor for interleukin 6. Binds to IL6 with low affinity, but does not transduce a signal	8.56	51,547.52	ANTI-INFLAMMATORY	51547.5
UNIPROT	Serum response factor	SRF is a transcription factor that binds to the serum response element (SRE), a short sequence of dyad symmetry located 300 bp to the 5' of the site of transcription initiation of some genes (such as FOS). Together with MRTFA transcription coactivator, controls expression of genes regulating the cytoskeleton during development, morphogenesis and cell migration. The SRF-MRTFA complex activity resp…	7.82	51592.7	TRANSCRIPTION	51592.7
UNIPROT	Hemopexin	Binds heme and transports it to the liver for breakdown and iron recovery, after which the free hemopexin returns to the circulation.	6.55	51676.4	CARRIER	51676.4
The Human Protein Atlas	Hemopexin	Binds heme and transports it to the liver for breakdown and iron recovery, after which the free hemopexin returns to the circulation.	6.55	51,676.37	CARRIER	51676.4
The Human Protein Atlas	Angiopoietin like 6	May play a role in the wound healing process. May promote epidermal proliferation, remodeling and regeneration.	8.78	51,694.23	STRUCTURAL	51694.2
DOI: 10.1002./pmic.200300449	Coagulation factor IX	Factor Xa is a vitamin K-dependent glycoprotein that converts prothrombin to thrombin in the presence of factor Va, calcium and phospholipid during blood clotting.	5.34	51,744.42	COAGULATION	51744.4
The Human Protein Atlas	Carboxypeptidase Q	Carboxypeptidase that may play an important role in the hydrolysis of circulating peptides.	5.79	51,887.56	ENZYME	51887.6
The Human Protein Atlas	Carnosine dipeptidase 1	Catalyzes the peptide bond hydrolysis in Xaa-His dipeptides, displaying the highest activity toward carnosine (beta-alanyl-L-histidine) and anserine (beta-alanyl-3-methyl-histidine).	5.09	51912.4	CATALYTIC ACTIVITY	51912.4
The Human Protein Atlas	Carboxypeptidase N subunit 1	Protects the body from potent vasoactive and inflammatory peptides containing C-terminal Arg or Lys (such as kinins or anaphylatoxins) which are released into the circulation.	6.86	52,286.23	ENZYME	52286.2
DOI: 10.1002./pmic.200300449	Carboxypeptidase N, regulatory chain	Protects the body from potent vasoactive and inflammatory peptides containing Arg or C-terminal Lys (such as kinins or anaphylatoxins) released into the circulation	6.86	52,286.23	IMMUNOLOGICAL	52286.2
UNIPROT	Abl interactor 1	May act in negative regulation of cell growth and transformation by interacting with nonreceptor tyrosine kinases ABL1 and/or ABL2. May play a role in regulation of EGF-induced Erk pathway activation. Involved in cytoskeletal reorganization and EGFR signaling. Together with EPS8 participates in transduction of signals from Ras to Rac. In vitro, a trimeric complex of ABI1, EPS8 and SOS1 exhibits R…	5.81	52467.8	CELL FUNCTION REGULATOR	52467.8
The Human Protein Atlas	Clusterin	Functions as extracellular chaperone that prevents aggregation of non native proteins. Prevents stress-induced aggregation of blood plasma proteins	5.88	52,494.58	CELLULAR ORGANIZATION	52494.6
The Human Protein Atlas	Serpin family C member 1	Most important serine protease inhibitor in plasma that regulates the blood coagulation cascade. AT-III inhibits thrombin, matriptase-3/TMPRSS7, as well as factors IXa, Xa and XIa. Its inhibitory activity is greatly enhanced in the presence of heparin.	6.32	52,602.44	INHIBITOR	52602.4
The Human Protein Atlas	Angiopoietin 2	Binds to TEK/TIE2, competing for the ANGPT1 binding site, and modulating ANGPT1 signaling. Can induce tyrosine phosphorylation of TEK/TIE2 in the absence of ANGPT1.	5.09	52,623.25	CELL CYCLE	52623.2
The Human Protein Atlas	Sushi repeat containing protein X-linked 2	Acts as a ligand for the urokinase plasminogen activator surface receptor. Plays a role in angiogenesis by inducing endothelial cell migration and the formation of vascular network (cords). Involved in cellular migration and adhesion. Increases the phosphorylation levels of FAK. Interacts with and increases the mitogenic activity of HGF. Promotes synapse formation. May have a role in the perisylv…	7.05	52971.9	SIGNAL	52971.9
DOI: 10.1002./pmic.200300449	Angiotensinogen	Essential component of the renin-angiotensin system (RAS), a potent regulator of blood pressure, body fluid and electrolyte homeostasis.	5.78	53,155.18	VASO-REGULATORY	53155.2
The Human Protein Atlas	Lipoprotein lipase	Key enzyme in triglyceride metabolism. Catalyzes the hydrolysis of triglycerides from circulating chylomicrons and very low density lipoproteins (VLDL), and thereby plays an important role in lipid clearance from the blood stream, lipid utilization and storage	8.37	53212.6	CATALYTIC ACTIVITY	53212.6
The Human Protein Atlas	Lipopolysaccharide binding protein	Plays a role in the innate immune response. Binds to the lipid A moiety of bacterial lipopolysaccharides (LPS), a glycolipid present in the outer membrane of all Gram-negative bacteria	6.28	53,412.67	IMMUNOLOGICAL	53412.7
UNIPROT	Myocyte-specific enhancer factor 2A	Transcriptional activator which binds specifically to the MEF2 element, 5'-YTA[AT](4)TAR-3', found in numerous muscle-specific genes. Also involved in the activation of numerous growth factor- and stress-induced genes. Mediates cellular functions not only in skeletal and cardiac muscle development, but also in neuronal differentiation and survival. Plays diverse roles in the control of cell growt…	8.81	53482.9	ACTIVATOR	53482.9
UNIPROT	Angiopoietin-related protein 3	Acts in part as a hepatokine that is involved in regulation of lipid and glucose metabolism 1, 2, 3, 4. Proposed to play a role in the trafficking of energy substrates to either storage or oxidative tissues in response to food intake (By similarity). Has a stimulatory effect on plasma triglycerides (TG), which is achieved by suppressing plasma TG clearance via inhibition of LPL activity. The inhi…	6.24	53637.5	CELLULAR ORGANIZATION	53637.5
The Human Protein Atlas	Angiopoietin like 3	Acts in part as a hepatokine that is involved in regulation of lipid and glucose metabolism	6.24	53,637.46	CELL CYCLE	53637.5
DOI: 10.1002./pmic.200300449	Vimentin	Vimentins are class-III intermediate filaments found in various non-epithelial cells, especially mesenchymal cells. Vimentin is attached to the nucleus, endoplasmic reticulum, and mitochondria, either laterally or terminally.	5.05	53,651.68	STRUCTURAL	53651.7
UNIPROT	Endothelial lipase	Exerts both phospholipase and triglyceride lipase activities 1, 2, 3. More active as a phospholipase than a triglyceride lipase 4. Hydrolyzes triglycerides, both with short-chain fatty acyl groups (tributyrin) and long-chain fatty acyl groups (triolein) with similar levels of activity toward both types of substrates 5. Hydrolyzes high density lipoproteins (HDL) more efficiently than other lipopro…	8.13	53688.9	ENZYME	53688.9
DOI: 10.1002./pmic.200300449	Tissue α-L-fucosidase	Alpha-L-fucosidase is responsible for hydrolyzing the alpha-1,6-linked fucose joined to the reducing-end N-acetylglucosamine of the carbohydrate moieties of glycoproteins.	6.37	53,688.86	CATALYTIC ACTIVITY	53688.9
The Human Protein Atlas	EGF like repeats and discoidin domains 3	Promotes adhesion of endothelial cells through interaction with the alpha-v/beta-3 integrin receptor. Inhibits formation of vascular-like structures. May be involved in regulation of vascular morphogenesis of remodeling in embryonic development.	7.08	53,764.87	ADHESION	53764.9
DOI: 10.1002./pmic.200300449	α-1-B Glycoprotein	The protein encoded by this gene is a plasma glycoprotein of unknown function.	5.58	54,272.56	UNSPECIFIC	54272.6
DOI: 10.1002./pmic.200300449	Vitronectin	Vitronectin is a cell adhesion and spreading factor found in serum and tissues. Vitronectin interact with glycosaminoglycans and proteoglycans. Is recognized by certain members of the integrin family and serves as a cell-to-substrate adhesion molecule. Inhibitor of the membrane-damaging effect of the terminal cytolytic complement pathway.	5.55	54,335.68	ADHESION	54335.7
The Human Protein Atlas	Serpin family F member 2	Serine protease inhibitor. The major targets of this inhibitor are plasmin and trypsin, but it also inactivates matriptase-3/TMPRSS7 and chymotrypsin.	5.87	54,565.76	INHIBITOR	54565.8
DOI: 10.1002./pmic.200300449	Coagulation factor X	Factor Xa is a vitamin K-dependent glycoprotein that converts prothrombin to thrombin in the presence of factor Va, calcium and phospholipid during blood clotting.	5.66	54,731.69	COAGULATION	54731.7
UNIPROT	Phospholipid transfer protein	Mediates the transfer of phospholipids and free cholesterol from triglyceride-rich lipoproteins (low density lipoproteins or LDL and very low density lipoproteins or VLDL) into high-density lipoproteins (HDL) as well as the exchange of phospholipids between triglyceride-rich lipoproteins themselves 1, 2, 3, 4, 5, 6. Facilitates the transfer of a spectrum of different lipid molecules, including di…	6.52	54739.4	CARRIER	54739.4
The Human Protein Atlas	Phospholipid transfer protein	Mediates the transfer of phospholipids and free cholesterol from triglyceride-rich lipoproteins (low density lipoproteins or LDL and very low density lipoproteins or VLDL) into high-density lipoproteins (HDL) as well as the exchange of phospholipids between triglyceride-rich lipoproteins themselves	6.53	54,739.44	CARRIER	54739.4
UNIPROT	Erythropoietin receptor	Receptor for erythropoietin, which mediates erythropoietin-induced erythroblast proliferation and differentiation 1, 2, 3, 4, 5. Upon EPO stimulation, EPOR dimerizes triggering the JAK2/STAT5 signaling cascade (By similarity). In some cell types, can also activate STAT1 and STAT3 6. May also activate the LYN tyrosine kinase (By similarity).	4.64	55065.4	RECEPTOR	55065.4
UNIPROT	Plasma protease C1 inhibitor	Activation of the C1 complex is under control of the C1-inhibitor. It forms a proteolytically inactive stoichiometric complex with the C1r or C1s proteases. May play a potentially crucial role in regulating important physiological pathways including complement activation, blood coagulation, fibrinolysis and the generation of kinins. Very efficient inhibitor of FXIIa. Inhibits chymotrypsin and kal…	6.09	55154.2	ACTIVATOR	55154.2
UNIPROT	RNA-splicing ligase RtcB homolog	Catalytic subunit of the tRNA-splicing ligase complex that acts by directly joining spliced tRNA halves to mature-sized tRNAs by incorporating the precursor-derived splice junction phosphate into the mature tRNA as a canonical 3',5'-phosphodiester. May act as an RNA ligase with broad substrate specificity, and may function toward other RNAs.	6.77	55210.3	CATALYTIC ACTIVITY	55210.3
The Human Protein Atlas	Protein C, inactivator of coagulation factors Va and VIIIa	Protein C is a vitamin K-dependent serine protease that regulates blood coagulation by inactivating factors Va and VIIIa in the presence of calcium ions and phospholipids 1. Exerts a protective effect on the endothelial cell barrier function	5.93	55,390.01	COAGULATION	55390
The Human Protein Atlas	Growth differentiation factor 5	Growth factor involved in bone and cartilage formation.	9.82	55,450.71	CELL CYCLE	55450.7
The Human Protein Atlas	Lipase C, hepatic type	Catalyzes the hydrolysis of triglycerides and phospholipids present in circulating plasma lipoproteins, including chylomicrons, intermediate density lipoproteins (IDL), low density lipoproteins (LDL) of large size and high density lipoproteins (HDL), releasing free fatty acids (FFA) and smaller lipoprotein particles	8.92	55,555.87	CATALYTIC ACTIVITY	55555.9
The Human Protein Atlas	Mannan binding lectin serine peptidase 1	Functions in the lectin pathway of complement, which performs a key role in innate immunity by recognizing pathogens through patterns of sugar moieties and neutralizing them.	5.29	55,693.05	IMMUNOLOGICAL	55693.1
The Human Protein Atlas	Fibrinogen beta chain	Cleaved by the protease thrombin to yield monomers which, together with fibrinogen alpha (FGA) and fibrinogen gamma (FGG), polymerize to form an insoluble fibrin matrix. Fibrin has a major function in hemostasis as one of the primary components of blood clots. In addition, functions during the early stages of wound repair to stabilize the lesion and guide cell migration during re-epithelializatio…	8.54	55928.2	COAGULATION	55928.2
The Human Protein Atlas	C3 and PZP like alpha-2-macroglobulin domain containing 8	Protease inhibitor, Serine protease inhibitor	7.69	56,015.98	IMMUNOLOGICAL	56016
DOI: 10.1002./pmic.200300449	Protein disulfide isomerase	This multifunctional protein catalyzes the formation, breakage and rearrangement of disulfide bonds. At the cell surface, seems to act as a reductase that cleaves disulfide bonds of proteins attached to the cell. May therefore cause structural modifications of exofacial proteins.	4.82	5,6453.94	CATALYTIC ACTIVITY	56453.9
DOI: 10.1002./pmic.200300449	Prenylcysteine ​​lyase	Involved in the degradation of prenylated proteins. Cleaves the thioether bond of prenyl-L-cysteines, such as farnesylcysteine and geranylgeranylcysteine.	5.85	56,649.15	METABOLIC	56649.2
The Human Protein Atlas	Angiopoietin like 1	Is a vascular assembly and maturation-mediating receptor tyrosine kinase that controls blood vessel development. https://www.ebi.ac.uk/interpro/entry/InterPro/IPR028843/	8.42	56,719.63	CELL CYCLE	56719.6
UNIPROT	Solute carrier family 2, facilitated glucose transporter member 10	Facilitative glucose transporter required for the development of the cardiovascular system.	8.9	56794.7	CARRIER	56794.7
The Human Protein Atlas	Angiopoietin 4	Binds to TEK/TIE2, modulating ANGPT1 signaling. Can induce tyrosine phosphorylation of TEK/TIE2. Promotes endothelial cell survival, migration and angiogenesis.	9.1	56,848.54	CELL CYCLE	56848.5
The Human Protein Atlas	Serine peptidase inhibitor, Kunitz type 1	Inhibitor of HGF activator. Also acts as an inhibitor of matriptase (ST14).	5.77	56,885.37	INHIBITOR	56885.4
UNIPROT	Serine/threonine-protein kinase Sgk3	Serine/threonine-protein kinase which is involved in the regulation of a wide variety of ion channels, membrane transporters, cell growth, proliferation, survival and migration. Up-regulates Na(+) channels: SCNN1A/ENAC and SCN5A, K(+) channels: KCNA3/KV1.3, KCNE1, KCNQ1 and KCNH2/HERG, epithelial Ca(2+) channels: TRPV5 and TRPV6, chloride channel: BSND, creatine transporter: SLC6A8, Na(+)/dicarbo…	6.44	56911.5	CELL FUNCTION REGULATOR	56911.5
UNIPROT	Cytochrome c oxidase subunit 1	Component of the cytochrome c oxidase, the last enzyme in the mitochondrial electron transport chain which drives oxidative phosphorylation. The respiratory chain contains 3 multisubunit complexes succinate dehydrogenase (complex II, CII), ubiquinol-cytochrome c oxidoreductase (cytochrome b-c1 complex, complex III, CIII) and cytochrome c oxidase (complex IV, CIV), that cooperate to transfer elect…	5.19	57041.4	ENZYME	57041.4
The Human Protein Atlas	Serpin family D member 1	Thrombin inhibitor activated by the glycosaminoglycans, heparin or dermatan sulfate. In the presence of the latter, HC-II becomes the predominant thrombin inhibitor in place of antithrombin III (AT-III). Also inhibits chymotrypsin, but in a glycosaminoglycan-independent manner.	6.41	57,070.61	INHIBITOR	57070.6
UNIPROT	Interleukin-6 receptor subunit beta	Signal-transducing molecule 1. The receptor systems for IL6, LIF, OSM, CNTF, IL11, CTF1 and BSF3 can utilize IL6ST for initiating signal transmission. Binding of IL6 to IL6R induces IL6ST homodimerization and formation of a high-affinity receptor complex, which activates the intracellular JAK-MAPK and JAK-STAT3 signaling pathways 2, 3, 4. That causes phosphorylation of IL6ST tyrosine residues whi…	8.00	57108.2	SIGNAL	57108.2
The Human Protein Atlas	Phospholipase A2 group III	Secretory calcium-dependent phospholipase A2 that primarily targets extracellular phospholipids. Hydrolyzes the ester bond of the fatty acyl group attached at sn-2 position of phospholipids without apparent head group selectivity	9.35	57,150.94	STRUCTURAL	57150.9
The Human Protein Atlas	Bone morphogenetic protein 6	Growth factor of the TGF-beta superfamily that plays essential roles in many developmental processes including cartilage and bone formation	8.39	57,225.64	CELL CYCLE	57225.6
DOI: 10.1002./pmic.200300449	Antitrombin lll	Most important serine protease inhibitor in plasma that regulates the blood coagulation cascade. AT-III inhibits thrombin, matriptase-3/TMPRSS7, as well as factors IXa, Xa and XIa. Its inhibitory activity is greatly enhanced in the presence of heparin.	7.97	57,335.01	COAGULATION	57335
UNIPROT	Cytochrome P450 3A4	Exhibits low testosterone 6-beta-hydroxylase activity.	8.27	57343.2	ENZYME	57343.2
DOI: 10.1002./pmic.200300449	Serine palmitoyltransferase 1	Serine palmitoyltransferase (SPT) . The heterodimer formed with SPTLC2 or SPTLC3 constitutes the catalytic core	7.18	57,396.20	CATALYTIC ACTIVITY	57396.2
UNIPROT	Interleukin-31 receptor subunit alpha	Associates with OSMR to form the interleukin-31 receptor which activates STAT3 and to a lower extent STAT1 and STAT5 1, 2, 3, 4. May function in skin immunity 5. Mediates IL31-induced itch, probably in a manner dependent on cation channels TRPA1 and TRPV1 (By similarity). Positively regulates numbers and cycling status of immature subsets of myeloid progenitor cells in bone marrow in vivo and enh…	6.04	57464	IMMUNOLOGICAL	57464
The Human Protein Atlas	Complement C1s	C1s B chain is a serine protease that combines with C1q and C1r to form C1, the first component of the classical pathway of the complement system. C1r activates C1s so that it can, in turn, activate C2 and C4	5.31	57519.1	ACTIVATOR	57519.1
UNIPROT	ATP synthase subunit alpha, mitochondrial	Mitochondrial membrane ATP synthase (F(1)F(0) ATP synthase or Complex V) produces ATP from ADP in the presence of a proton gradient across the membrane which is generated by electron transport complexes of the respiratory chain. F-type ATPases consist of two structural domains, F(1) - containing the extramembraneous catalytic core, and F(0) - containing the membrane proton channel, linked togethe…	9.31	57547.1	CATALYTIC ACTIVITY	57547.1
UNIPROT	Cytochrome P450 11B2, mitochondrial	A cytochrome P450 monooxygenase that catalyzes the biosynthesis of aldosterone, the main mineralocorticoid in the human body responsible for salt and water homeostasis, thus involved in blood pressure regulation, arterial hypertension, and the development of heart failure 1, 2, 3, 4, 5, 6, 7, 8, 9, 10. Catalyzes three sequential oxidative reactions of 11-deoxycorticosterone (21-hydroxyprogesteron…	9.47	57560.1	CATALYTIC ACTIVITY	57560.1
The Human Protein Atlas	Kallikrein B1	The enzyme cleaves Lys-Arg and Arg-Ser bonds. It activates, in a reciprocal reaction, factor XII after its binding to a negatively charged surface. It also releases bradykinin from HMW kininogen and may also play a role in the renin-angiotensin system by converting prorenin into renin.	8.78	57,639.9	ENZYME	57639.9
DOI: 10.1002./pmic.200300449	Plasma kallikrein	The enzyme cleaves Lys-Arg and Arg-Ser bonds. It activates, in a reciprocal reaction, factor XII after its binding to a negatively charged surface.	8.74	57,642.90	ENZYME	57642.9
DOI: 10.1002./pmic.200300449	Vitamin K-dependent protein C	Protein C is a vitamin K-dependent serine protease that regulates blood coagulation by inactivating factors Va and VIIIa in the presence of calcium ions and phospholipids. Exerts a protective effect on the endothelial cell barrier function	6.38	58359.2	COAGULATION	58359.2
The Human Protein Atlas	Chromosome 14 open reading frame 93	UNSPECIFIC	5.7	58,696.76	UNSPECIFIC	58696.8
UNIPROT	Solute carrier family 2, facilitated glucose transporter member 9	High-capacity urate transporter, which may play a role in the urate reabsorption by proximal tubules 1, 2, 3, 4, 5. May have a residual high-affinity, low-capacity glucose and fructose transporter activity 6, 7, 8. Transports urate at rates 45-to 60-fold faster than glucose 9. Does not transport galactose 10. May mediate small uptake of adenine but not of other nucleobases 11.	9.09	58701.8	CARRIER	58701.8
The Human Protein Atlas	Anti-Mullerian hormone	Plays an important role in several reproductive functions. Induces Muellerian duct regression during male fetal sexual differentiation 1, 2, 3. Also plays a role in Leydig cell differentiation and function (By similarity). In female acts as a negative regulator of the primordial to primary follicle transition and decreases FSH sensitivity of growing follicles 4. AMH signals by binding to a specif…	7.04	59193.2	HORMONE	59193.2
The Human Protein Atlas	Anti-Mullerian hormone	This glycoprotein, produced by the Sertoli cells of the testis, causes regression of the Muellerian duct. It is also able to inhibit the growth of tumors derived from tissues of Muellerian duct origin.	7.04	59,193.15	INHIBITOR	59193.2
The Human Protein Atlas	Activated leukocyte cell adhesion molecule	Cell adhesion molecule that mediates both heterotypic cell-cell contacts via its interaction with CD6, as well as homotypic cell-cell contacts	5.8	59,510.7	ADHESION	59510.7
UNIPROT	Monocarboxylate transporter 8	Specific thyroid hormone transmembrane transporter, that mediates both uptake and efflux of thyroid hormones across the cell membrane independently of pH or a Na(+) gradient. Major substrates are the iodothyronines T3 and T4 and to a lesser extent rT3 and 3,3-diiodothyronine (3,3'-T2) 1, 2, 3, 4, 5, 6, 7. Acts as an important mediator of thyroid hormone transport, especially T3, through the blood…	5.43	59511.4	CARRIER	59511.4
DOI: 10.1002./pmic.200300449	Histidine-rich glycoprotein	Plasma glycoprotein that binds a number of ligands such as heme, heparin, heparan sulfate, thrombospondin, plasminogen, and divalent metal ions.	7.09	59568.3	COAGULATION	59568.3
UNIPROT	UDP-glucuronosyltransferase 1A1	[Isoform 1]: UDP-glucuronosyltransferase (UGT) that catalyzes phase II biotransformation reactions in which lipophilic substrates are conjugated with glucuronic acid to increase the metabolite's water solubility, thereby facilitating excretion into either the urine or bile 1, 2, 3, 4, 5, 6, 7. Essential for the elimination and detoxification of drugs, xenobiotics and endogenous compounds 8, 9, 10…	7.19	59591.4	CATALYTIC ACTIVITY	59591.4
DOI: 10.1002./pmic.200300449	Catalase	Occurs in almost all aerobically respiring organisms and serves to protect cells from the toxic effects of hydrogen peroxide. Promotes growth of cells including T-cells, B-cells, myeloid leukemia cells, melanoma cells, mastocytoma cells and normal and transformed fibroblast cells.	6.9	59756.2	IMMUNOLOGICAL	59756.2
The Human Protein Atlas	Carboxypeptidase N subunit 2	The 83 kDa subunit binds and stabilizes the catalytic subunit at 37 degrees Celsius and keeps it in circulation. Under some circumstances it may be an allosteric modifier of the catalytic subunit.	5.72	60,646.79	ENZYME	60646.8
DOI: 10.1002./pmic.200300449	Complement component C8, β chain	Constituent of the membrane attack complex (MAC) that plays a key role in the innate and adaptive immune response by forming pores in the plasma membrane of target cells.	7.85	61,053.11	IMMUNOLOGICAL	61053.1
DOI: 10.1002./pmic.200300449	Biotinidase	Catalytic release of biotin from biocytin, the product of biotin-dependent carboxylases degradation.	5.81	61,132.92	ENZYME	61132.9
The Human Protein Atlas	Alpha-1,3-mannosyl-glycoprotein 4-beta-N-acetylglucosaminyltransferase A	Catalyzes the formation of the GlcNAcbeta1-4 branch on the GlcNAcbeta1-2Manalpha1-3 arm of the core structure of N-linked glycans.	6.94	61,543.96	CATALYTIC ACTIVITY	61544
DOI: 10.1002./pmic.200300449	Fibulin 1	Incorporated into fibronectin-containing matrix fibers. May play a role in cell adhesion and migration along protein fibers within the extracellular matrix (ECM).	4.85	61580	CARRIER	61580
DOI: 10.1002./pmic.200300449	Complement component C8, α chain	Constituent of the membrane attack complex (MAC) that plays a key role in the innate and adaptive immune response by forming pores in the plasma membrane of target cells. C8A inserts into the target membrane, but does not form pores by itself.	5.74	61,711.04	IMMUNOLOGICAL	61711
DOI: 10.1002./pmic.200300449 UniProt	Vitamin K-dependent protein S	Anticoagulant plasma protein; it is a cofactor to activated protein C in the degradation of coagulation factors Va and VIIIa. It helps to prevent coagulation and stimulating fibrinolysis.	5.45	61,796.42	COAGULATION	61796.4
The Human Protein Atlas	Peptidoglycan recognition protein 2	May play a scavenger role by digesting biologically active peptidoglycan (PGN) into biologically inactive fragments. Has no direct bacteriolytic activity.	6.97	62,185.94	ANTIMICROBIAL	62185.9
The Human Protein Atlas	Leucine rich repeat LGI family member 2	Required for the development of soma-targeting inhibitory GABAergic synapses made by parvalbumin-positive basket cells.	6.47	62298.4	INHIBITOR	62298.4
UNIPROT	Ferroportin	Transports Fe(2+) from the inside of a cell to the outside of the cell, playing a key role for maintaining systemic iron homeostasis 1, 2, 3, 4, 5, 6, 7. Transports iron from intestinal, splenic, hepatic cells, macrophages and erythrocytes into the blood to provide iron to other tissues (By similarity). Controls therefore dietary iron uptake, iron recycling by macrophages and erythrocytes, and re…	6.08	62542.1	CARRIER	62542.1
The Human Protein Atlas	Hyaluronan binding protein 2	Cleaves the alpha-chain at multiple sites and the beta-chain between 'Lys-53' and 'Lys-54' but not the gamma-chain of fibrinogen and therefore does not initiate the formation of the fibrin clot and does not cause the fibrinolysis directly.	6.03	62,671.7	ADHESION	62671.7
The Human Protein Atlas	Plasminogen activator, tissue type	Converts the abundant, but inactive, zymogen plasminogen to plasmin by hydrolyzing a single Arg-Val bond in plasminogen. By controlling plasmin-mediated proteolysis, it plays an important role in tissue remodeling and degradation, in cell migration and many other physiopathological events.	8.14	62,917.06	COAGULATION	62917.1
UNIPROT	3-phosphoinositide-dependent protein kinase 1	Serine/threonine kinase which acts as a master kinase, phosphorylating and activating a subgroup of the AGC family of protein kinases. Its targets include: protein kinase B (PKB/AKT1, PKB/AKT2, PKB/AKT3), p70 ribosomal protein S6 kinase (RPS6KB1), p90 ribosomal protein S6 kinase (RPS6KA1, RPS6KA2 and RPS6KA3), cyclic AMP-dependent protein kinase (PRKACA), protein kinase C (PRKCD and PRKCZ), serum…	5.95	63151.8	CELL FUNCTION REGULATOR	63151.8
DOI: 10.1002./pmic.200300449	Complement component C9	Constituent of the membrane attack complex (MAC) that plays a key role in the innate and adaptive immune response by forming pores in the plasma membrane of target cells	5.43	63,173.38	IMMUNOLOGICAL	63173.4
The Human Protein Atlas	Glucose-6-phosphate isomerase	In the cytoplasm, catalyzes the conversion of glucose-6-phosphate to fructose-6-phosphate, the second step in glycolysis, and the reverse reaction during gluconeogenesis	8.42	63,179.19	CATALYTIC ACTIVITY	63179.2
The Human Protein Atlas	Complement C9	Constituent of the membrane attack complex (MAC) that plays a key role in the innate and adaptive immune response by forming pores in the plasma membrane of target cells	5.37	63,203.4	IMMUNOLOGICAL	63203.4
The Human Protein Atlas	Endogenous retrovirus group MER34 member 1, envelope	Endogenous envelope proteins originate from retroviral envelope proteins, which mediate receptor recognition and membrane fusion during early infection.	8.16	63,546.96	CELL CYCLE	63547
The Human Protein Atlas	Neurexophilin and PC-esterase domain family member 3	This gene encodes a member of the neurexophilin family of neuropeptide-like glycoproteins. This protein binds alpha neurexins, a group of presynaptic transmembrane receptors that promote adhesion between dendrites and axons. Alternative splicing results in multiple transcript variants.	9.05	63,799.57	ADHESION	63799.6
The Human Protein Atlas	Coagulation factor XI	Factor XI triggers the middle phase of the intrinsic pathway of blood coagulation by activating factor IX.	8.64	63,840.17	COAGULATION	63840.2
UNIPROT	Transmembrane glycoprotein NMB	The protein encoded by this gene is a type I transmembrane glycoprotein which shows homology to the pMEL17 precursor, a melanocyte-specific protein. GPNMB shows expression in the lowly metastatic human melanoma cell lines and xenografts but does not show expression in the highly metastatic cell lines. GPNMB may be involved in growth delay and reduction of metastatic potential. Two transcript vari…	6.16	63922.6	STRUCTURAL	63922.6
The Human Protein Atlas	Ring finger and SPRY domain containing 1	This gene encodes a glycoprotein that contains a RING-type zinc finger domain and an SPRY domain of unknown function. Alternative splicing of this gene results in multiple transcript variants.	5.35	64,180.21	TRANSCRIPTION	64180.2
UNIPROT	Keratin, type II cytoskeletal 1	May regulate the activity of kinases such as PKC and SRC via binding to integrin beta-1 (ITB1) and the receptor of activated protein C kinase 1 (RACK1). In complex with C1QBP is a high affinity receptor for kininogen-1/HMWK.	8.14	64260.2	RECEPTOR	64260.2
The Human Protein Atlas	Complement factor H related 5	Involved in complement regulation. The dimerized forms have avidity for tissue-bound complement fragments and efficiently compete with the physiological complement inhibitor CFH.	6.8	64,419.41	CELL FUNCTION REGULATOR	64419.4
UNIPROT	Reduced folate transporter	Antiporter that mediates the import of reduced folates or a subset of cyclic dinucleotides, driven by the export of organic anions 1, 2, 3, 4, 5, 6, 7, 8, 9. Mechanistically, acts as a secondary active transporter, which exports intracellular organic anions down their concentration gradients to facilitate the uptake of its substrates 10, 11, 12. Has high affinity for N5-methyltetrahydrofolate, th…	9.14	64868.3	CARRIER	64868.3
The Human Protein Atlas	Acyloxyacyl hydrolase	Removes the secondary (acyloxyacyl-linked) fatty acyl chains from the lipid A region of bacterial lipopolysaccharide	8.45	65,104.5	METABOLIC	65104.5
The Human Protein Atlas	Complement C8 alpha chain	Constituent of the membrane attack complex (MAC) that plays a key role in the innate and adaptive immune response by forming pores in the plasma membrane of target cells. C8A inserts into the target membrane, but does not form pores by itself.	6.21	65153.2	IMMUNOLOGICAL	65153.2
The Human Protein Atlas	Coagulation factor II, thrombin	Thrombin, which cleaves bonds after Arg and Lys, converts fibrinogen to fibrin and activates factors V, VII, VIII, XIII, and, in complex with thrombomodulin, protein C. Functions in blood homeostasis, inflammation and wound healing.	5.5	65,408.52	COAGULATION	65408.5
The Human Protein Atlas	Interleukin 1 receptor accessory protein	Coreceptor for IL1RL2 in the IL-36 signaling system (By similarity). Coreceptor with IL1R1 in the IL-1 signaling system.	8.37	65,418.44	SIGNAL	65418.4
DOI: 10.1002./pmic.200300449	Semenogelin ll	Participates in the formation of a gel matrix (sperm coagulum) entrapping the accessory gland secretions and ejaculated spermatozoa.	9.09	65,444.47	CELL CYCLE	65444.5
DOI: 10.1002./pmic.200300449	Insulin-like growth factor-binding protein complex acid labile chain	Involved in protein-protein interactions resulting in protein complexes, receptor-ligand binding or cell adhesion.	6.33	66,035.01	ADHESION	66035
UNIPROT	NADH-ubiquinone oxidoreductase chain 5	Core subunit of the mitochondrial membrane respiratory chain NADH dehydrogenase (Complex I) which catalyzes electron transfer from NADH through the respiratory chain, using ubiquinone as an electron acceptor 1. Essential for the catalytic activity and assembly of complex I	9.14	66038.7	CATALYTIC ACTIVITY	66038.7
DOI: 10.1002./pmic.200300449	Lamin-B1	Lamins are components of the nuclear lamina, a fibrous layer on the nucleoplasmic side of the inner nuclear membrane, which is thought to provide a framework for the nuclear envelope and may also interact with chromatin.	5.11	66,408.34	CELLULAR ORGANIZATION	66408.3
UNIPROT	Forkhead box protein O3	Transcriptional activator that recognizes and binds to the DNA sequence 5'-[AG]TAAA[TC]A-3' and regulates different processes, such as apoptosis and autophagy 1, 2, 3, 4. Acts as a positive regulator of autophagy in skeletal muscle: in starved cells, enters the nucleus following dephosphorylation and binds the promoters of autophagy genes, such as GABARAP1L, MAP1LC3B and ATG12, thereby activating…	4.98	66996.5	CELL FUNCTION REGULATOR	66996.5
UNIPROT	NADH-ubiquinone oxidoreductase chain 5	UNSPECIFIC	9.14	67026.5	UNSPECIFIC	67026.5
The Human Protein Atlas	VGF nerve growth factor inducible	[Neurosecretory protein VGF]: Secreted polyprotein that is packaged and proteolytically processed by prohormone convertases PCSK1 and PCSK2 in a cell-type-specific manner (By similarity). VGF and peptides derived from its processing play many roles in neurogenesis and neuroplasticity associated with learning, memory, depression and chronic pain (By similarity).	4.53	67,257.87	SIGNAL	67257.9
UNIPROT	Transcription factor E2-alpha	Transcriptional regulator involved in the initiation of neuronal differentiation and mesenchymal to epithelial transition (By similarity). Heterodimers between TCF3 and tissue-specific basic helix-loop-helix (bHLH) proteins play major roles in determining tissue-specific cell fate during embryogenesis, like muscle or early B-cell differentiation (By similarity). Together with TCF15, required for …	6.21	67265.1	CELL FUNCTION REGULATOR	67265.1
UNIPROT	Golgin subfamily A member 8B	May be involved in maintaining Golgi structure.	6.46	67278.1	STRUCTURAL	67278.1
UNIPROT	Interleukin-1 receptor-associated kinase 3	Putative inactive protein kinase which regulates signaling downstream of immune receptors including IL1R and Toll-like receptors 1, 2. Inhibits dissociation of IRAK1 and IRAK4 from the Toll-like receptor signaling complex by either inhibiting the phosphorylation of IRAK1 and IRAK4 or stabilizing the receptor complex (By similarity). Upon IL33-induced lung inflammation, positively regulates expres…	6.25	67752.7	CELL FUNCTION REGULATOR	67752.7
DOI: 10.1002./pmic.200300449	Coagulation factor XII	Participates in the initiation of blood coagulation, fibrinolysis, and the generation of bradykinin and angiotensin.	8.04	67,818.13	COAGULATION	67818.1
UNIPROT	Hepatocyte nuclear factor 1-alpha	The protein encoded by this gene is a transcription factor required for the expression of several liver-specific genes. The encoded protein functions as a homodimer and binds to the inverted palindrome 5'-GTTAATNATTAAC-3'. Defects in this gene are a cause of maturity onset diabetes of the young type 3 (MODY3) and also can result in the appearance of hepatic adenomas. Alternative splicing results …	5.76	68109.3	TRANSCRIPTION	68109.3
DOI: 10.1002./pmic.200300449	Cholinesterase	Esterase with broad substrate specificity. Contributes to the inactivation of the neurotransmitter acetylcholine. Can degrade neurotoxic organophosphate esters.	7.12	68,418.06	ENZYME	68418.1
The Human Protein Atlas	Butyrylcholinesterase	Esterase with broad substrate specificity. Contributes to the inactivation of the neurotransmitter acetylcholine. Can degrade neurotoxic organophosphate esters.	7.12	68,418.06	INHIBITOR	68418.1
DOI: 10.1002./pmic.200300449	Involucrin	Part of the insoluble cornified cell envelope (CE) of stratified squamous epithelia	4.62	68,478.52	STRUCTURAL	68478.5
The Human Protein Atlas	Alpha fetoprotein	Binds copper, nickel, and fatty acids as well as, and bilirubin less well than, serum albumin. Only a small percentage (less than 2%) of the human AFP shows estrogen-binding properties.	5.48	68,677.57	ADHESION	68677.6
DOI: 10.1002./pmic.200300449	Afamin	May transport vitamin E in body fluids under conditions where the lipoprotein system is not sufficient	5.64	69,069.12	ADHESION	69069.1
DOI: 10.1002./pmic.200300449	Albumin	Its main function is the regulation of the colloidal osmotic pressure of blood (Probable).	5.92	69,366.68	CARRIER	69366.7
UNIPROT	Forkhead box protein O1	Transcription factor that is the main target of insulin signaling and regulates metabolic homeostasis in response to oxidative stress 1, 2, 3, 4, 5, 6, 7, 8. Binds to the insulin response element (IRE) with consensus sequence 5'-TT[G/A]TTTTG-3' and the related Daf-16 family binding element (DBE) with consensus sequence 5'-TT[G/A]TTTAC-3' 9. Activity suppressed by insulin 10. Main regulator of red…	6.28	69661.6	CELL FUNCTION REGULATOR	69661.6
UNIPROT	Uromodulin	[Uromodulin]: Functions in biogenesis and organization of the apical membrane of epithelial cells of the thick ascending limb of Henle's loop (TALH), where it promotes formation of complex filamentous gel-like structure that may play a role in the water barrier permeability (Probable). May serve as a receptor for binding and endocytosis of cytokines (IL-1, IL-2) and TNF 1. Facilitates neutrophil …	5.05	69760.9	CELLULAR ORGANIZATION	69760.9
UNIPROT	Delta(14)-sterol reductase LBR	Catalyzes the reduction of the C14-unsaturated bond of lanosterol, as part of the metabolic pathway leading to cholesterol biosynthesis 1, 2, 3, 4, 5. Plays a critical role in myeloid cell cholesterol biosynthesis which is essential to both myeloid cell growth and functional maturation (By similarity). Mediates the activation of NADPH oxidases, perhaps by maintaining critical levels of cholestero…	9.40	70703.2	CATALYTIC ACTIVITY	70703.2
The Human Protein Atlas	Secretogranin II	Neuroendocrine protein of the granin family that regulates the biogenesis of secretory granules.	4.68	70,868.66	SECRETOR	70868.7
UNIPROT	Sodium- and chloride-dependent glycine transporter 1	Sodium- and chloride-dependent glycine transporter 1. Essential for regulating glycine concentrations at inhibitory glycinergic synapses.	7.04	71276.6	INHIBITOR	71276.6
The Human Protein Atlas	HGF activator	Activates hepatocyte growth factor (HGF) by converting it from a single chain to a heterodimeric form.	6.69	71464.6	COAGULATION	71464.6
The Human Protein Atlas	Growth hormone receptor	Receptor for pituitary gland growth hormone involved in regulating postnatal body growth. On ligand binding, couples to the JAK2/STAT5 pathway (By similarity).	4.76	71,499.5	RECEPTOR	71499.5
UNIPROT	T-cell differentiation antigen CD6	Cell adhesion molecule that mediates cell-cell contacts and regulates T-cell responses via its interaction with ALCAM/CD166 1, 2, 3, 4, 5, 6. Contributes to signaling cascades triggered by activation of the TCR/CD3 complex 7. Functions as a costimulatory molecule; promotes T-cell activation and proliferation 8, 9, 10. Contributes to the formation and maturation of the immunological synapse 11, 12…	4.82	71800.9	ADHESION	71800.9
The Human Protein Atlas	CD6 molecule	Cell adhesion molecule that mediates cell-cell contacts and regulates T-cell responses via its interaction with ALCAM/CD166	4.82	71889.1	ADHESION	71889.1
UNIPROT	Kininogen-1	Kininogens are inhibitors of thiol proteases. HMW-kininogen plays an important role in blood coagulation by helping to position optimally prekallikrein and factor XI next to factor XII; HMW-kininogen inhibits the thrombin- and plasmin-induced aggregation of thrombocytes. LMW-kininogen inhibits the aggregation of thrombocytes. LMW-kininogen is in contrast to HMW-kininogen not involved in blood clo…	6.33	71927.3	COAGULATION	71927.3
UNIPROT	Broad substrate specificity ATP-binding cassette transporter ABCG2	Broad substrate specificity ATP-dependent transporter of the ATP-binding cassette (ABC) family that actively extrudes a wide variety of physiological compounds, dietary toxins and xenobiotics from cells 1, 2, 3, 4, 5, 6, 7. Involved in porphyrin homeostasis, mediating the export of protoporphyrin IX (PPIX) from both mitochondria to cytosol and cytosol to extracellular space, it also functions in …	7.91	72314.2	CARRIER	72314.2
DOI: 10.1002./pmic.200300449	78 kDa Glucose-regulated protein	Involved in the correct folding of proteins and degradation of misfolded proteins via its interaction with DNAJC10/ERdj5, probably to facilitate the release of DNAJC10/ERdj5 from its substrate (By similarity). Acts as a key repressor of the ERN1/IRE1-mediated unfolded protein response (UPR)	5.07	72,332.96	METABOLIC	72333
UNIPROT	Signal transducer and activator of transcription 5B	Carries out a dual function: signal transduction and activation of transcription 1. Mediates cellular responses to the cytokine KITLG/SCF and other growth factors. Binds to the GAS element and activates PRL-induced transcription. Positively regulates hematopoietic/erythroid differentiation.	5.70	72481.6	TRANSCRIPTION	72481.6
The Human Protein Atlas	Protein S	Anticoagulant plasma protein; it is a cofactor to activated protein C in the degradation of coagulation factors Va and VIIIa. It helps to prevent coagulation and stimulating fibrinolysis.	5.36	73,473.63	COAGULATION	73473.6
DOI: 10.1002./pmic.200300449	Tenascin-X	Appears to mediate interactions between cells and the extracellular matrix. Substrate-adhesion molecule that appears to inhibit cell migration.	5.66	73,971.65	ADHESION	73971.6
UNIPROT	Sodium/myo-inositol cotransporter 2	Involved in the sodium-dependent cotransport of myo-inositol (MI) with a Na(+):MI stoichiometry of 2:1 1, 2. Exclusively responsible for apical MI transport and absorption in intestine (By similarity). Can also transport D-chiro-inositol (DCI) but not L-fucose 3, 4. Exhibits stereospecific cotransport of both D-glucose and D-xylose (By similarity). May induce apoptosis through the TNF-alpha, PDCD…	6.33	74036.3	CARRIER	74036.3
The Human Protein Atlas	Versican	May play a role in intercellular signaling and in connecting cells with the extracellular matrix. May take part in the regulation of cell motility, growth and differentiation. Binds hyaluronic acid.	6.96	74,292.80	ADHESION	74292.8
The Human Protein Atlas	Proprotein convertase subtilisin/kexin type 9	Crucial player in the regulation of plasma cholesterol homeostasis.	6.09	74,372.3	CELL FUNCTION REGULATOR	74372.3
The Human Protein Atlas	Transforming growth factor beta induced	Plays a role in cell adhesion. May play a role in cell-collagen interactions (By similarity).	7.62	74,680.90	ADHESION	74680.9
The Human Protein Atlas	Growth arrest specific 6	Ligand for tyrosine-protein kinase receptors AXL, TYRO3 and MER whose signaling is implicated in cell growth and survival, cell adhesion and cell migration. GAS6/AXL signaling plays a role in various processes such as endothelial cell survival during acidification by preventing apoptosis, optimal cytokine signaling during human natural killer cell development, hepatic regeneration, gonadotropin-r…	5.46	74925.3	SIGNAL	74925.3
The Human Protein Atlas	Inter-alpha-trypsin inhibitor heavy chain 3	May act as a carrier of hyaluronan in serum or as a binding protein between hyaluronan and other matrix protein, including those on cell surfaces in tissues to regulate the localization, synthesis and degradation of hyaluronan which are essential to cells undergoing biological processes.	5.64	75,078.15	INHIBITOR	75078.1
DOI: 10.1002./pmic.200300449	Coagulation factor XIII, B chain	The B chain of factor XIII is not catalytically active, but is thought to stabilize the A subunits and regulate the rate of transglutaminase formation by thrombin.	5.97	75,491.63	COAGULATION	75491.6
UNIPROT	Epithelial sodium channel subunit alpha	Sodium permeable non-voltage-sensitive ion channel inhibited by the diuretic amiloride. Mediates the electrodiffusion of the luminal sodium (and water, which follows osmotically) through the apical membrane of epithelial cells. Plays an essential role in electrolyte and blood pressure homeostasis, but also in airway surface liquid homeostasis, which is important for proper clearance of mucus. Con…	7.46	75703.7	CELL FUNCTION REGULATOR	75703.7
The Human Protein Atlas	Mannan binding lectin serine peptidase 2	Serum protease that plays an important role in the activation of the complement system via mannose-binding lectin. After activation by auto-catalytic cleavage it cleaves C2 and C4, leading to their activation and to the formation of C3 convertase.	5.43	75,750.45	IMMUNOLOGICAL	75750.4
UNIPROT	Serine/threonine-protein kinase PLK2	Tumor suppressor serine/threonine-protein kinase involved in synaptic plasticity, centriole duplication and G1/S phase transition. Polo-like kinases act by binding and phosphorylating proteins that are already phosphorylated on a specific motif recognized by the POLO box domains. Phosphorylates CENPJ, NPM1, RAPGEF2, RASGRF1, SNCA, SIPA1L1 and SYNGAP1. Plays a key role in synaptic plasticity and m…	8.57	76650.9	ACTIVATOR	76650.9
UNIPROT	Serotransferrin	Transferrins are iron binding transport proteins which can bind two Fe(3+) ions in association with the binding of an anion, usually bicarbonate. It is responsible for the transport of iron from sites of absorption and heme degradation to those of storage and utilization. Serum transferrin may also have a further role in stimulating cell proliferation.	6.80	77063.9	CARRIER	77063.9
The Human Protein Atlas	Adhesion G protein-coupled receptor G1	Receptor involved in cell adhesion and probably in cell-cell interactions. Mediates cell matrix adhesion in developing neurons and hematopoietic stem cells.	8.74	77,072.18	ADHESION	77072.2
DOI: 10.1002./pmic.200300449	Transferrin	Transferrins are iron binding transport proteins which can bind two Fe(3+) ions in association with the binding of an anion, usually bicarbonate. It is responsible for the transport of iron from sites of absorption and heme degradation to those of storage and utilization. Serum transferrin may also have a further role in stimulating cell proliferation.	6.97	77,079.9	ADHESION	77079.9
The Human Protein Atlas	Fms related receptor tyrosine kinase 1	Tyrosine-protein kinase that acts as a cell-surface receptor for VEGFA, VEGFB and PGF, and plays an essential role in the development of embryonic vasculature, the regulation of angiogenesis, cell survival, cell migration, macrophage function, chemotaxis, and cancer cell invasion. Acts as a positive regulator of postnatal retinal hyaloid vessel regression (By similarity). May play an essential ro…	8.44	77474.2	RECEPTOR	77474.2
UNIPROT	Receptor for retinol uptake STRA6	Functions as a retinol transporter. Accepts all-trans retinol from the extracellular retinol-binding protein RBP4, facilitates retinol transport across the cell membrane, and then transfers retinol to the cytoplasmic retinol-binding protein RBP1 1, 2, 3. Retinol uptake is enhanced by LRAT, an enzyme that converts retinol to all-trans retinyl esters, the storage forms of vitamin A 4, 5. Contribute…	9.21	77922.1	CARRIER	77922.1
DOI: 10.1002./pmic.200300449	Lactotransferrin	Transferrins are iron binding transport proteins which can bind two Fe(3+) ions in association with the binding of an anion, usually bicarbonate.	8.56	78,111.82	ADHESION	78111.8
The Human Protein Atlas	Matrix metallopeptidase 9	Matrix metalloproteinase that plays an essential role in local proteolysis of the extracellular matrix and in leukocyte migration	5.62	78,399.16	METABOLIC	78399.2
The Human Protein Atlas	Inter-alpha-trypsin inhibitor heavy chain 5	May act as a tumor suppressor.	9.09	78,437.75	INHIBITOR	78437.8
The Human Protein Atlas	Macrophage expressed 1	Plays a key role in the innate immune response following bacterial infection by inserting into the bacterial surface to form pores (By similarity).	7.77	78,587.08	IMMUNOLOGICAL	78587.1
The Human Protein Atlas	Angiotensin I converting enzyme	Converts angiotensin I to angiotensin II by release of the terminal His-Leu, this results in an increase of the vasoconstrictor activity of angiotensin. Also able to inactivate bradykinin, a potent vasodilator.	6.06	78,694.18	VASO-REGULATORY	78694.2
The Human Protein Atlas	Microtubule associated protein tau	Promotes microtubule assembly and stability, and might be involved in the establishment and maintenance of neuronal polarity	6.25	78927.6	SIGNAL	78927.6
The Human Protein Atlas	Angiogenic factor with G-patch and FHA domains 1	Promotes angiogenesis and the proliferation of endothelial cells. Able to bind to endothelial cells and promote cell proliferation, suggesting that it may act in an autocrine fashion	5.29	80,977.34	ADHESION	80977.3
UNIPROT	Ribosomal protein S6 kinase alpha-1	Serine/threonine-protein kinase that acts downstream of ERK (MAPK1/ERK2 and MAPK3/ERK1) signaling and mediates mitogenic and stress-induced activation of the transcription factors CREB1, ETV1/ER81 and NR4A1/NUR77, regulates translation through RPS6 and EIF4B phosphorylation, and mediates cellular proliferation, survival, and differentiation by modulating mTOR signaling and repressing pro-apoptoti…	8.57	81147.3	SIGNAL	81147.3
The Human Protein Atlas	Vascular cell adhesion molecule 1	Cell adhesion glycoprotein predominantly expressed on the surface of endothelial cells that plays an important role in immune surveillance and inflammation 1. Acts as a major regulator of leukocyte adhesion to the endothelium through interaction with different types of integrins 2. During inflammatory responses, binds ligands on the surface of activated endothelial cells to initiate the activatio…	5.14	81276.2	ADHESION	81276.2
UNIPROT	NAD-dependent protein deacetylase sirtuin-1	This gene encodes a member of the sirtuin family of proteins, homologs to the yeast Sir2 protein. Members of the sirtuin family are characterized by a sirtuin core domain and grouped into four classes. The functions of human sirtuins have not yet been determined; however, yeast sirtuin proteins are known to regulate epigenetic gene silencing and suppress recombination of rDNA. Studies suggest tha…	4.54	81681	CELL FUNCTION REGULATOR	81681
The Human Protein Atlas	Macrophage stimulating 1	The protein encoded by this gene contains four kringle domains and a serine protease domain, similar to that found in hepatic growth factor.	7.6	81,998.89	IMMUNOLOGICAL	81998.9
The Human Protein Atlas	Hepatocyte growth factor	Potent mitogen for mature parenchymal hepatocyte cells, seems to be a hepatotrophic factor, and acts as a growth factor for a broad spectrum of tissues and cell types. Activating ligand for the receptor tyrosine kinase MET by binding to it and promoting its dimerization.	8.22	83,133.69	CELL CYCLE	83133.7
DOI: 10.1002./pmic.200300449	Coagulation factor XIII A chain	Factor XIII is activated by thrombin and calcium ion to a transglutaminase that catalyzes the formation of gamma-glutamyl-epsilon-lysine cross-links between fibrin chains, thus stabilizing the fibrin clot.	5.69	83,268.28	COAGULATION	83268.3
DOI: 10.1002./pmic.200300449	Myeloperoxidase	Part of the host defense system of polymorphonuclear leukocytes. It is responsible for microbicidal activity against a wide range of organisms.	9.19	83,868.57	ANTIMICROBIAL	83868.6
DOI: 10.1002./pmic.200300449	Hyaluronan mediated motility receptor	Receptor for hyaluronic acid (HA) (By similarity). Involved in cell motility (By similarity). When hyaluronan binds to HMMR, the phosphorylation of a number of proteins, including PTK2/FAK1 occurs.	5.68	84,100.44	RECEPTOR	84100.4
UNIPROT	Transferrin receptor protein 1	Cellular uptake of iron occurs via receptor-mediated endocytosis of ligand-occupied transferrin receptor into specialized endosomes 1. Endosomal acidification leads to iron release. The apotransferrin-receptor complex is then recycled to the cell surface with a return to neutral pH and the concomitant loss of affinity of apotransferrin for its receptor. Transferrin receptor is necessary for devel…	6.17	84871.4	RECEPTOR	84871.4
The Human Protein Atlas	Transferrin receptor	Cellular uptake of iron occurs via receptor-mediated endocytosis of ligand-occupied transferrin receptor into specialized endosomes	6.09	84,901.40	CARRIER	84901.4
The Human Protein Atlas	Amyloid beta precursor protein	Functions as a cell surface receptor and performs physiological functions on the surface of neurons relevant to neurite growth, neuronal adhesion and axonogenesis.	4.72	85,040.12	RECEPTOR	85040.1
The Human Protein Atlas	Semaphorin 3F	May play a role in cell motility and cell adhesion.	8.25	85,081.67	ADHESION	85081.7
DOI: 10.1002./pmic.200300449	Complement factor B	It has also been implicated in proliferation and differentiation of preactivated B-lymphocytes	6.67	85,272.54	IMMUNOLOGICAL	85272.5
DOI: 10.1002./pmic.200300449	Complement factor B	It has also been implicated in proliferation and differentiation of preactivated B-lymphocytes	6.67	85,532.87	IMMUNOLOGICAL	85532.9
DOI: 10.1002./pmic.200300449	Gelsolin	Calcium-regulated, actin-modulating protein that binds to the plus (or barbed) ends of actin monomers or filaments, preventing monomer exchange (end-blocking or capping). It can promote the assembly of monomers into filaments (nucleation) as well as sever filaments already formed. Plays a role in ciliogenesis.	5.87	85,697.52	BIOMARKER	85697.5
The Human Protein Atlas	MET proto-oncogene, receptor tyrosine kinase	Receptor tyrosine kinase that transduces signals from the extracellular matrix into the cytoplasm by binding to hepatocyte growth factor/HGF ligand. Regulates many physiological processes including proliferation, scattering, morphogenesis and survival.	8.02	85,745.08	RECEPTOR	85745.1
UNIPROT	Transient receptor potential cation channel subfamily V member 4	Non-selective calcium permeant cation channel involved in osmotic sensitivity and mechanosensitivity 1, 2, 3, 4, 5, 6. Activation by exposure to hypotonicity within the physiological range exhibits an outward rectification 7, 8, 9. Also activated by heat, low pH, citrate and phorbol esters 10, 11, 12, 13, 14, 15. Increase of intracellular Ca(2+) potentiates currents. Channel activity seems to be …	8.42	85884.2	STRUCTURAL	85884.2
The Human Protein Atlas	Semaphorin 3G	Has chemorepulsive activities for sympathetic axons. Ligand of NRP2 (By similarity).	7.97	86,700.75	SIGNAL	86700.8
The Human Protein Atlas	ADAM metallopeptidase domain 28	May play a role in the adhesive and proteolytic events that occur during lymphocyte emigration or may function in ectodomain shedding of lymphocyte surface target proteins, such as FASL and CD40L. May be involved in sperm maturation.	6.55	87,179.7	ADHESION	87179.7
UNIPROT	Prolyl endopeptidase FAP	UNSPECIFIC	6.20	87712.6	UNSPECIFIC	87712.6
The Human Protein Atlas	Interleukin 4 receptor	The IL4/IL13 responses are involved in regulating IgE production and, chemokine and mucus production at sites of allergic inflammation. In certain cell types, can signal through activation of insulin receptor substrates, IRS1/IRS2.	4.99	89,658.25	INFLAMMATORY	89658.2
UNIPROT	U4/U6.U5 tri-snRNP-associated protein 1	This gene encodes two proteins, the SART1(800) protein expressed in the nucleus of the majority of proliferating cells, and the SART1(259) protein expressed in the cytosol of epithelial cancers. The SART1(259) protein is translated by the mechanism of -1 frameshifting during posttranscriptional regulation; its full-length sequence is not published yet. The two encoded proteins are thought to be i…	5.89	89865.9	BIOMARKER	89865.9
The Human Protein Atlas	Endothelin 2	Endothelins are endothelium-derived vasoconstrictor peptides.	19,959.88	90254.8	VASO-REGULATORY	90254.8
DOI: 10.1002./pmic.200300449	Plasminogen	Plasmin dissolves the fibrin of blood clots and acts as a proteolytic factor in a variety of other processes including embryonic development, tissue remodeling, tumor invasion, and inflammation. In ovulation, weakens the walls of the Graafian follicle.	7.2	90,568	CELLULAR ORGANIZATION	90568
UNIPROT	Sodium/hydrogen exchanger 1	UNSPECIFIC	6.74	90763	UNSPECIFIC	90763
The Human Protein Atlas	Spondin 1	Cell adhesion protein that promotes the attachment of spinal cord and sensory neuron cells and the outgrowth of neurites in vitro. May contribute to the growth and guidance of axons in both the spinal cord and the PNS (By similarity). Major factor for vascular smooth muscle cell.	5.85	90,973.48	ADHESION	90973.5
The Human Protein Atlas	Chondroitin sulfate synthase 1	Involved in the negative control of osteogenesis likely through the modulation of NOTCH signalin	9.31	91,784.39	CATALYTIC ACTIVITY	91784.4
The Human Protein Atlas	Adhesion G protein-coupled receptor E5	Receptor potentially involved in both adhesion and signaling processes early after leukocyte activation. Plays an essential role in leukocyte migration.	6.5	91869.3	RECEPTOR	91869.3
UNIPROT	Mucosa-associated lymphoid tissue lymphoma translocation protein 1	Protease that enhances BCL10-induced activation: acts via formation of CBM complexes that channel adaptive and innate immune signaling downstream of CARD domain-containing proteins (CARD9, CARD11 and CARD14) to activate NF-kappa-B and MAP kinase p38 pathways which stimulate expression of genes encoding pro-inflammatory cytokines and chemokines 1, 2, 3. Mediates BCL10 cleavage: MALT1-dependent BCL…	5.47	92272.4	ACTIVATOR	92272.4
The Human Protein Atlas	Sortilin related receptor 1	Sorting receptor that directs several proteins to their correct location within the cell (Probable). Along with AP-1 complex, involved Golgi apparatus - endosome sorting	6.3	92,282.59	CARRIER	92282.6
UNIPROT	Apolipoproteina B	Apolipoprotein B is a major protein constituent of chylomicrons (apo B-48), LDL (apo B-100) and VLDL (apo B-100). Apo B-100 functions as a recognition signal for the cellular binding and internalization of LDL particles by the apoB/E receptor.	7.15	92333.7	ADHESION	92333.7
The Human Protein Atlas	Angiotensin I converting enzyme 2	Essential counter-regulatory carboxypeptidase of the renin-angiotensin hormone system that is a critical regulator of blood volume, systemic vascular resistance, and thus cardiovascular homeostasis	5.36	92,463.04	VASO-REGULATORY	92463
DOI: 10.1002./pmic.200300449	Endoplasmin	Molecular chaperone that functions in the processing and transport of secreted proteins (By similarity).	4.76	92468.9	CARRIER	92468.9
The Human Protein Atlas	Apolipoprotein B	Apo B-100 functions as a recognition signal for the cellular binding and internalization of LDL particles by the apoB/E receptor.	7.15	92,647.09	CARRIER	92647.1
The Human Protein Atlas	Thioredoxin domain containing 16	UNSPECIFIC	5.1	93,040.30	UNSPECIFIC	93040.3
UNIPROT	Transforming growth factor beta receptor type 3	Binds to TGF-beta. Could be involved in capturing and retaining TGF-beta for presentation to the signaling receptors (By similarity). In gonadotrope cells, acts as an inhibin A coreceptor and regulates follicle-stimulating hormone (FSH) levels and female fertility 1.	5.44	93499.4	RECEPTOR	93499.4
DOI: 10.1002./pmic.200300449	Complement component C7	Constituent of the membrane attack complex (MAC) that plays a key role in the innate and adaptive immune response by forming pores in the plasma membrane of target cells. C7 serves as a membrane anchor.	6.09	93,518.24	IMMUNOLOGICAL	93518.2
UNIPROT	Volume-regulated anion channel subunit LRRC8A	Essential component of the volume-regulated anion channel (VRAC, also named VSOAC channel), an anion channel required to maintain a constant cell volume in response to extracellular or intracellular osmotic changes 1, 2, 3, 4, 5, 6. The VRAC channel conducts iodide better than chloride and can also conduct organic osmolytes like taurine 7, 8, 9, 10, 11, 12. Mediates efflux of amino acids, such as…	7.15	94198.7	STRUCTURAL	94198.7
The Human Protein Atlas	Interleukin 17 receptor A	Receptor for IL17A and IL17F, major effector cytokines of innate and adaptive immune system involved in antimicrobial host defense and maintenance of tissue integrity.	5.06	96,131.4	IMMUNOLOGICAL	96131.4
The Human Protein Atlas	Xylosyltransferase 2	Catalyzes the first step in the biosynthesis of chondroitin sulfate, heparan sulfate and dermatan sulfate proteoglycans, such as DCN. Transfers D-xylose from UDP-D-xylose to specific serine residues of the core protein.	8.49	96,767.13	CATALYTIC ACTIVITY	96767.1
UNIPROT	Serine/threonine-protein kinase WNK4	Serine/threonine-protein kinase component of the WNK4-SPAK/OSR1 kinase cascade, which acts as a key regulator of ion transport in the distal nephron and blood pressure (By similarity). The WNK4-SPAK/OSR1 kinase cascade is composed of WNK4, which mediates phosphorylation and activation of downstream kinases OXSR1/OSR1 and STK39/SPAK 1. Following activation, OXSR1/OSR1 and STK39/SPAK catalyze phosp…	5.35	97353.8	CELL FUNCTION REGULATOR	97353.8
UNIPROT	Tyrosine-protein kinase receptor UFO	Receptor tyrosine kinase that transduces signals from the extracellular matrix into the cytoplasm by binding growth factor GAS6 and which is thus regulating many physiological processes including cell survival, cell proliferation, migration and differentiation. Ligand binding at the cell surface induces dimerization and autophosphorylation of AXL. Following activation by ligand, AXL binds and ind…	5.2	97377.6	RECEPTOR	97377.6
UNIPROT	Breast cancer anti-estrogen resistance protein 1	Docking protein which plays a central coordinating role for tyrosine kinase-based signaling related to cell adhesion 1, 2. Implicated in induction of cell migration and cell branching 3, 4, 5. Involved in the BCAR3-mediated inhibition of TGFB signaling	5.38	97876.9	SIGNAL	97876.9
UNIPROT	V-type proton ATPase 116 kDa subunit a 2	Subunit of the V0 complex of vacuolar(H+)-ATPase (V-ATPase), a multisubunit enzyme composed of a peripheral complex (V1) that hydrolyzes ATP and a membrane integral complex (V0) that translocates protons (By similarity). V-ATPase is responsible for acidifying and maintaining the pH of intracellular compartments and in some cell types, is targeted to the plasma membrane, where it is responsible fo…	6.18	98082.3	ENZYME	98082.3
The Human Protein Atlas	Ectonucleotide pyrophosphatase/phosphodiesterase 2	Hydrolyzes lysophospholipids to produce the signaling molecule lysophosphatidic acid (LPA) in extracellular fluids	7.14	99,003.63	ENZYME	99003.6
The Human Protein Atlas	Inter-alpha-trypsin inhibitor heavy chain 4	Type II acute-phase protein (APP) involved in inflammatory responses to trauma. May also play a role in liver development or regeneration.	6.06	99,857.44	INHIBITOR	99857.4
DOI: 10.1002./pmic.200300449	β -Mannosidase	Exoglycosidase that cleaves the single beta-linked mannose residue from the non-reducing end of all N-linked glycoprotein oligosaccharides.	5.32	100,836.49	METABOLIC	100836
DOI: 10.1002./pmic.200300449	Inter-α-trypsin inhibitor heavy chain H1	May act as a carrier of hyaluronan in serum or as a binding protein between hyaluronan and other matrix protein, including those on cell surfaces in tissues to regulate the localization, synthesis and degradation of hyaluronan which are essential to cells undergoing biological processes.	6.31	101,389.13	CARRIER	101389
The Human Protein Atlas	Proprotein convertase subtilisin/kexin type 5	Serine endoprotease that processes various proproteins by cleavage at paired basic amino acids, recognizing the RXXX[KR]R consensus motif. Likely functions in the constitutive and regulated secretory pathways. Plays an essential role in pregnancy establishment by proteolytic activation of a number of important factors such as BMP2, CALD1 and alpha-integrins.	7.01	101,649.36	CELL FUNCTION REGULATOR	101649
UNIPROT	Ephrin type-A receptor 2	Receptor tyrosine kinase which binds promiscuously membrane-bound ephrin-A family ligands residing on adjacent cells, leading to contact-dependent bidirectional signaling into neighboring cells. The signaling pathway downstream of the receptor is referred to as forward signaling while the signaling pathway downstream of the ephrin ligand is referred to as reverse signaling. Activated by the ligan…	5.94	102680	RECEPTOR	102680
49DOI: 10.1002./pmic.200300449	Protocadherin α-11	Potential calcium-dependent cell-adhesion protein. May be involved in the establishment and maintenance of specific neuronal connections in the brain.	5.22	103,298.16	ADHESION	103298
DOI: 10.1002./pmic.200300449	Complement factor C6	Constituent of the membrane attack complex (MAC) that plays a key role in the innate and adaptive immune response by forming pores in the plasma membrane of target cells.	6.39	104,786.06	IMMUNOLOGICAL	104786
The Human Protein Atlas	Complement C6	Constituent of the membrane attack complex (MAC) that plays a key role in the innate and adaptive immune response by forming pores in the plasma membrane of target cells.	6.31	104844	IMMUNOLOGICAL	104844
The Human Protein Atlas	Inter-alpha-trypsin inhibitor heavy chain 2	May act as a carrier of hyaluronan in serum or as a binding protein between hyaluronan and other matrix protein, including those on cell surfaces in tissues to regulate the localization, synthesis and degradation of hyaluronan which are essential to cells undergoing biological processes.	6.56	105,189.04	INHIBITOR	105189
UNIPROT	Autotaxin	Secreted lysophospholipase D that hydrolyzes lysophospholipids to produce the signaling molecule lysophosphatidic acid (LPA) in extracellular fluids 1, 2, 3, 4, 5. Its major substrate is lysophosphatidylcholine 6, 7, 8. Can also act on sphingosylphosphorylcholine producing sphingosine-1-phosphate, a modulator of cell motility 9. Can hydrolyze, in vitro, bis-pNPP, to some extent pNP-TMP, and barel…	8.58	105247	SIGNAL	105247
The Human Protein Atlas	Fc receptor like 5	Plays an important role in B-cell response to antigen that acts both as a negative or positive coreceptor. Inhibits B-cell receptor (BCR) signaling in the absence of CR2 stimulation but engagement with CR2 and the BCR lead to a superior calcium response compared to CR2 and BCR costimulation 1. May be involved in B-cell development and differentiation in peripheral lymphoid organs and may be usefu…	6.7	106437	RECEPTOR	106437
DOI: 10.1002./pmic.200300449	Inter-α-trypsin inhibitor heavy chain H2	May act as a carrier of hyaluronan in serum or as a binding protein between hyaluronan and other matrix protein, including those on cell surfaces in tissues to regulate the localization, synthesis and degradation of hyaluronan which are essential to cells undergoing biological processes.	6.4	106,463.47	CARRIER	106463
The Human Protein Atlas	Signal peptide, CUB domain and EGF like domain containing 2	Lipid-binding protein required for SHH long-range signaling by binding to the dually lipid-modified SHH (ShhNp) and by promoting ShhNp mobilization, solubilization and release from the cell membrane	6.3	106,643.95	ADHESION	106644
The Human Protein Atlas	Endoplasmic reticulum aminopeptidase 1	Aminopeptidase that plays a central role in peptide trimming, a step required for the generation of most HLA class I-binding peptides.	5.97	107,045.40	CELLULAR ORGANIZATION	107045
The Human Protein Atlas	Xylosyltransferase 1	Catalyzes the first step in the biosynthesis of chondroitin sulfate and dermatan sulfate proteoglycans, such as DCN. Transfers D-xylose from UDP-D-xylose to specific serine residues of the core protein Required for normal embryonic and postnatal skeleton development, especially of the long bones. Required for normal maturation of chondrocytes during bone development, and normal onset of ossificat…	9.32	107,569.23	CATALYTIC ACTIVITY	107569
The Human Protein Atlas	Signal peptide, CUB domain and EGF like domain containing 3	Binds to TGFBR2 and activates TGFB signaling. In lung cancer cells, could serve as an endogenous autocrine and paracrine ligand of TGFBR2, which could regulate TGFBR2 signaling and hence modulate epithelial-mesenchymal transition and cancer progression.	7.85	109,282.5	ADHESION	109282
UNIPROT	Aminopeptidase N	Broad specificity aminopeptidase which plays a role in the final digestion of peptides generated from hydrolysis of proteins by gastric and pancreatic proteases. Also involved in the processing of various peptides including peptide hormones, such as angiotensin III and IV, neuropeptides, and chemokines. May also be involved the cleavage of peptides bound to major histocompatibility complex class …	5.31	109540	CARRIER	109540
UNIPROT	Tight junction protein 2	Plays a role in tight junctions and adherens junctions (By similarity). Acts as a positive regulator of RANKL-induced osteoclast differentiation, potentially via mediating downstream transcriptional activity (By similarity).	7.07	111650	STRUCTURAL	111650
UNIPROT	Ras GTPase-activating protein 1	The protein encoded by this gene is located in the cytoplasm and is part of the GAP1 family of GTPase-activating proteins. The gene product stimulates the GTPase activity of normal RAS p21 but not its oncogenic counterpart. Acting as a suppressor of RAS function, the protein enhances the weak intrinsic GTPase activity of RAS proteins resulting in the inactive GDP-bound form of RAS, thereby allowi…	6.42	115065	ACTIVATOR	115065
The Human Protein Atlas	Suppressor of glucose, autophagy associated 1	Regulates autophagy by playing a role in the reduction of glucose production in an adiponectin- and insulin-dependent manner.	5.35	11,5757.79	CELL DEATH	115758
The Human Protein Atlas	Klotho	May be involved in the regulation of calcium and phosphorus homeostasis by inhibiting the synthesis of active vitamin D (By similarity). Essential factor for the specific interaction between FGF23 and FGFR1 (By similarity).	8.06	11,6132.8	CELL FUNCTION REGULATOR	116133
UNIPROT	Atrial natriuretic peptide-converting enzyme	Serine-type endopeptidase involved in atrial natriuretic peptide (NPPA) and brain natriuretic peptide (NPPB) processing 1, 2, 3, 4. Converts through proteolytic cleavage the non-functional propeptides NPPA and NPPB into their active hormones, ANP and BNP(1-32) respectively, thereby regulating blood pressure in the heart and promoting natriuresis, diuresis and vasodilation 5, 6, 7, 8. Proteolytic …	4.87	116486	ENZYME	116486
DOI: 10.1002./pmic.200300449	Vinculin	Actin filament (F-actin)-binding protein involved in cell-matrix adhesion and cell-cell adhesion. Regulates cell-surface E-cadherin expression and potentiates mechanosensing by the E-cadherin complex. May also play important roles in cell morphology and locomotion.	5.83	11,6722.38	STRUCTURAL	116722
UNIPROT	Leucyl-cystinyl aminopeptidase	Release of an N-terminal amino acid, cleaves before cysteine, leucine as well as other amino acids. Degrades peptide hormones such as oxytocin, vasopressin and angiotensin III, and plays a role in maintaining homeostasis during pregnancy. May be involved in the inactivation of neuronal peptides in the brain. Cleaves Met-enkephalin and dynorphin. Binds angiotensin IV and may be the angiotensin IV …	5.5	117349	CELL FUNCTION REGULATOR	117349
The Human Protein Atlas	Arginine vasopressin	Specifically binds vasopressin.	6.22	118173	VASO-REGULATORY	118173
UNIPROT	Phosphatidylinositol 4,5-bisphosphate 3-kinase catalytic subunit delta isoform	Phosphoinositide-3-kinase (PI3K) phosphorylates phosphatidylinositol (PI) and its phosphorylated derivatives at position 3 of the inositol ring to produce 3-phosphoinositides 1. Uses ATP and PtdIns(4,5)P2 (phosphatidylinositol 4,5-bisphosphate) to generate phosphatidylinositol 3,4,5-trisphosphate (PIP3) 2. PIP3 plays a key role by recruiting PH domain-containing proteins to the membrane, includin…	6.78	119479	CARRIER	119479
The Human Protein Atlas	TEK receptor tyrosine kinase	Tyrosine-protein kinase that acts as cell-surface receptor for ANGPT1, ANGPT2 and ANGPT4 and regulates angiogenesis, endothelial cell survival, proliferation, migration, adhesion and cell spreading, reorganization of the actin cytoskeleton, but also maintenance of vascular quiescence. Has anti-inflammatory effects by preventing the leakage of proinflammatory plasma proteins and leukocytes from bl…	6.51	121031	RECEPTOR	121031
UNIPROT	Extracellular calcium-sensing receptor	G-protein-coupled receptor that senses changes in the extracellular concentration of calcium ions and plays a key role in maintaining calcium homeostasis 1, 2, 3, 4, 5, 6, 7, 8, 9, 10, 11, 12, 13, 14. Senses fluctuations in the circulating calcium concentration and modulates the production of parathyroid hormone (PTH) in parathyroid glands (By similarity). The activity of this receptor is mediate…	4.62	121773	RECEPTOR	121773
DOI: 10.1002./pmic.200300449	Ceruloplasmin	May also play a role in fetal lung development or pulmonary antioxidant defense (By similarity).	5.44	122,205.19	CARRIER	122205
DOI: 10.1002./pmic.200300449	Ceruloplasmin	May also play a role in fetal lung development or pulmonary antioxidant defense (By similarity).	5.44	122,219.22	CELLULAR ORGANIZATION	122219
UNIPROT	Leptin receptor	Receptor for hormone LEP/leptin (Probable) 1. On ligand binding, mediates LEP central and peripheral effects through the activation of different signaling pathways such as JAK2/STAT3 and MAPK cascade/FOS. In the hypothalamus, LEP acts as an appetite-regulating factor that induces a decrease in food intake and an increase in energy consumption by inducing anorexinogenic factors and suppressing ore…	6.12	123968	RECEPTOR	123968
The Human Protein Atlas	CD163 molecule	Acute phase-regulated receptor involved in clearance and endocytosis of hemoglobin/haptoglobin complexes by macrophages and may thereby protect tissues from free hemoglobin-mediated oxidative damage. May play a role in the uptake and recycling of iron, via endocytosis of hemoglobin/haptoglobin and subsequent breakdown of heme.	5.61	12,5436.62	IMMUNOLOGICAL	125437
The Human Protein Atlas	Protocadherin 12	Cellular adhesion molecule that may play an important role in cell-cell interactions at interendothelial junctions (By similarity). Acts as a regulator of cell migration, probably via increasing cell-cell adhesion	5.13	128,994.6	ADHESION	128995
DOI: 10.1002./pmic.200300449}	Thrombospondin-1	Adhesive glycoprotein that mediates cell-to-cell and cell-to-matrix interactions. Binds heparin. May play a role in dentinogenesis and/or maintenance of dentin and dental pulp (By similarity).	4.71	129,352.64	ADHESION	129353
The Human Protein Atlas	Epidermal growth factor receptor	Receptor tyrosine kinase binding ligands of the EGF family and activating several signaling cascades to convert extracellular cues into appropriate cellular responses	6.38	129,364.92	CELL CYCLE	129365
UNIPROT	Immunoglobulin heavy constant mu	Constant region of immunoglobulin heavy chains. Immunoglobulins, also known as antibodies, are membrane-bound or secreted glycoproteins produced by B lymphocytes. In the recognition phase of humoral immunity, the membrane-bound immunoglobulins serve as receptors which, upon binding of a specific antigen, trigger the clonal expansion and differentiation of B lymphocytes into immunoglobulins-secret…	9.69	132450	IMMUNOLOGICAL	132450
The Human Protein Atlas	Latent transforming growth factor beta binding protein 3	Key regulator of transforming growth factor beta (TGFB1, TGFB2 and TGFB3) that controls TGF-beta activation by maintaining it in a latent state during storage in extracellular space.	5.76	134,291.71	CELL FUNCTION REGULATOR	134292
UNIPROT	Protein mago nashi homolog	Required for pre-mRNA splicing as component of the spliceosome 1. Plays a redundant role with MAGOHB as core component of the exon junction complex (EJC) and in the nonsense-mediated decay (NMD) pathway 2. The EJC is a dynamic structure consisting of core proteins and several peripheral nuclear and cytoplasmic associated factors that join the complex only transiently either during EJC assembly or…	5.74	136212	ADHESION	136212
The Human Protein Atlas	Multiple EGF like domains 6	Predicted to enable calcium ion binding activity. Predicted to be located in extracellular region.	6.21	138,457.23	ADHESION	138457
UNIPROT	Protein diaphanous homolog 1	Actin nucleation and elongation factor required for the assembly of F-actin structures, such as actin cables and stress fibers (By similarity). Binds to the barbed end of the actin filament and slows down actin polymerization and depolymerization (By similarity). Required for cytokinesis, and transcriptional activation of the serum response factor (By similarity). DFR proteins couple Rho and Src …	5.31	141347	TRANSCRIPTION	141347
DOI: 10.1002./pmic.200300449	Attractin	Involved in the initial immune cell clustering during inflammatory response and may regulate chemotactic activity of chemokines.	6.65	141,428.77	INFLAMMATORY	141429
The Human Protein Atlas	Sushi, nidogen and EGF like domains 1	Predicted to enable Notch binding activity. Predicted to be involved in cell-matrix adhesion. Predicted to be located in extracellular region.	6.22	142,092.19	ADHESION	142092
The Human Protein Atlas	Inter-alpha-trypsin inhibitor heavy chain family member 6	The protein encoded by this gene belongs to the interalpha trypsin inhibitor heavy chain (ITIH) family. Interalpha trypsin inhibitor (ITI) is composed of two heavy chains (containing VWA domain) and one light chain. The light chain confers the protease-inhibitor function, while the heavy chains are involved in mediating protein-protein interactions with the components of the extracellular matrix.	8.91	143,187.19	INHIBITOR	143187
UNIPROT	Attractin	Involved in the initial immune cell clustering during inflammatory response and may regulate chemotactic activity of chemokines. May play a role in melanocortin signaling pathways that regulate energy homeostasis and hair color. Low-affinity receptor for agouti (By similarity). Has a critical role in normal myelination in the central nervous system	6.58	146444	IMMUNOLOGICAL	146444
The Human Protein Atlas	Fibrillin 1	[Fibrillin-1]: Structural component of the 10-12 nm diameter microfibrils of the extracellular matrix, which conveys both structural and regulatory properties to load-bearing connective tissues	4.64	147,449.35	STRUCTURAL	147449
The Human Protein Atlas	Phospholipase A2 receptor 1	Receptor for secretory phospholipase A2 (sPLA2). Acts as a receptor for phospholipase sPLA2-IB/PLA2G1B but not sPLA2-IIA/PLA2G2A. Also able to bind to snake PA2-like toxins.	5.67	152,780.94	STRUCTURAL	152781
DOI: 10.1002./pmic.200300449	Alpha-2-macroglobulin	Is able to inhibit all four classes of proteinases by a unique 'trapping' mechanism.	6	163278	COAGULATION	163278
The Human Protein Atlas	PZP alpha-2-macroglobulin like	Is able to inhibit all four classes of proteinases by a unique 'trapping' mechanism. This protein has a peptide stretch, called the 'bait region' which contains specific cleavage sites for different proteinases.	5.97	163,831.94	INHIBITOR	163832
DOI: 10.1002./pmic.200300449	Pregnancy zone protein	Is able to inhibit all four classes of proteinases by a unique 'trapping' mechanism.	5.97	163,835.93	INHIBITOR	163836
UNIPROT	Low-density lipoprotein receptor-related protein 5	Acts as a coreceptor with members of the frizzled family of seven-transmembrane spanning receptors to transduce signal by Wnt proteins 1, 2, 3, 4, 5, 6. Activates the canonical Wnt signaling pathway that controls cell fate determination and self-renewal during embryonic development and adult tissue regeneration 7, 8. In particular, may play an important role in the development of the posterior pa…	5.11	179145	RECEPTOR	179145
The Human Protein Atlas	Thrombospondin type 1 domain containing 7A	[Thrombospondin type-1 domain-containing protein 7A]: Plays a role in actin cytoskeleton rearrangement.	7.62	185,336.40	STRUCTURAL	185336
The Human Protein Atlas	Complement C3	C3 plays a central role in the activation of the complement system.	6.02	187,148.06	ACTIVATOR	187148
DOI: 10.1002./pmic.200300449	Complement component C3	C3 plays a central role in the activation of the complement system.	6.02	187,164.11	ACTIVATOR	187164
The Human Protein Atlas	Complement C4A (Rodgers blood group)	Non-enzymatic component of C3 and C5 convertases and thus essential for the propagation of the classical complement pathway.	6.68	187764	CELL FUNCTION REGULATOR	187764
The Human Protein Atlas	Complement C5	Activation of C5 by a C5 convertase initiates the spontaneous assembly of the late complement components, C5-C9, into the membrane attack complex. C5b has a transient binding site for C6. The C5b-C6 complex is the foundation upon which the lytic complex is assembled.	6.11	188331	INFLAMMATORY	188331
DOI: 10.1002./pmic.200300449	Complement component C5	Activation of C5 by a C5 convertase initiates the spontaneous assembly of the late complement components, C5-C9, into the membrane attack complex.	6.11	188,331.37	ACTIVATOR	188331
The Human Protein Atlas	Complement C4B (Chido blood group)	Non-enzymatic component of the C3 and C5 convertases and thus essential for the propagation of the classical complement pathway.	7.21	188355	CELL FUNCTION REGULATOR	188355
UNIPROT	Serine/threonine-protein kinase WNK3	Serine/threonine-protein kinase component of the WNK3-SPAK/OSR1 kinase cascade, which plays an important role in the regulation of electrolyte homeostasis and regulatory volume increase in response to hyperosmotic stress 1, 2, 3, 4, 5. WNK3 mediates regulatory volume increase in response to hyperosmotic stress by acting as a molecular crowding sensor, which senses cell shrinkage and mediates form…	5.47	191789	CELL FUNCTION REGULATOR	191789
UNIPROT	C-myc promoter-binding protein	Probable guanine nucleotide exchange factor (GEF) which may activate RAB10. Promotes the exchange of GDP to GTP, converting inactive GDP-bound Rab proteins into their active GTP-bound form. According to 1, it may bind to ISRE-like element (interferon-stimulated response element) of MYC P2 promoter.	7.07	209244	ACTIVATOR	209244
The Human Protein Atlas	Lipoprotein(a)	Apo(a) is the main constituent of lipoprotein(a) (Lp(a)). It has serine proteinase activity and is able of autoproteolysis. Inhibits tissue-type plasminogen activator 1. Lp(a) may be a ligand for megalin/Gp 330.	5.71	226516	INHIBITOR	226516
UNIPROT	Fanconi anemia group M protein	DNA-dependent ATPase component of the Fanconi anemia (FA) core complex 1. Required for the normal activation of the FA pathway, leading to monoubiquitination of the FANCI-FANCD2 complex in response to DNA damage, cellular resistance to DNA cross-linking drugs, and prevention of chromosomal breakage 2, 3, 4, 5, 6. In complex with CENPS and CENPX, binds double-stranded DNA (dsDNA), fork-structured …	5.76	232191	ENZYME	232191
UNIPROT	Dedicator of cytokinesis protein 8	Guanine nucleotide exchange factor (GEF) which specifically activates small GTPase CDC42 by exchanging bound GDP for free GTP 1, 2. During immune responses, required for interstitial dendritic cell (DC) migration by locally activating CDC42 at the leading edge membrane of DC (By similarity). Required for CD4(+) T-cell migration in response to chemokine stimulation by promoting CDC42 activation at…	6.43	238529	ACTIVATOR	238529
The Human Protein Atlas	Coagulation factor V	Central regulator of hemostasis. It serves as a critical cofactor for the prothrombinase activity of factor Xa that results in the activation of prothrombin to thrombin..	5.68	251,703.42	COAGULATION	251703
UNIPROT	Protein C-ets-1	Transcription factor 1, 2. Directly controls the expression of cytokine and chemokine genes in a wide variety of different cellular contexts 3. May control the differentiation, survival and proliferation of lymphoid cells 4. May also regulate angiogenesis through regulation of expression of genes controlling endothelial cell migration and invasion 5, 6.	6.32	254302	TRANSCRIPTION	254302
The Human Protein Atlas	Coagulation factor VIIl	Factor VIII, along with calcium and phospholipid, acts as a cofactor for F9/factor IXa when it converts F10/factor X to the activated form, factor Xa.	6.95	266,993.32	COAGULATION	266993
DOI: 10.1002./pmic.200300449	Fibronectin	Fibronectins bind cell surfaces and various compounds including collagen, fibrin, heparin, DNA, and actin	5.31	272,320.36	ADHESION	272320
UNIPROT	Rho guanine nucleotide exchange factor 1	Seems to play a role in the regulation of RhoA GTPase by guanine nucleotide-binding alpha-12 (GNA12) and alpha-13 (GNA13) subunits 1, 2. Acts as a GTPase-activating protein (GAP) for GNA12 and GNA13, and as guanine nucleotide exchange factor (GEF) for RhoA GTPase 3, 4, 5, 6. Activated G alpha 13/GNA13 stimulates the RhoGEF activity through interaction with the RGS-like domain 7. This GEF activity…	5.60	275482	CELL FUNCTION REGULATOR	275482
The Human Protein Atlas	Von Willebrand factor	Important in the maintenance of hemostasis, it promotes adhesion of platelets to the sites of vascular injury by forming a molecular bridge between sub-endothelial collagen matrix and platelet-surface receptor complex GPIb-IX-V. Also acts as a chaperone for coagulation factor VIII, delivering it to the site of injury, stabilizing its heterodimeric structure and protecting it from premature cleara…	5.32	309,298.62	COAGULATION	309299
The Human Protein Atlas	Guanylate cyclase activator 2A	Endogenous activator of intestinal guanylate cyclase. It stimulates this enzyme through the same receptor binding region as the heat-stable enterotoxins	12,448.42 115 aa protein	314775	ACTIVATOR	314775
DOI: 10.1002./pmic.200300449	Laminin α-2 chain	Binding to cells via a high affinity receptor, laminin is thought to mediate the attachment, migration and organization of cells into tissues during embryonic development by interacting with other extracellular matrix components.	6.02	342,932.32	ADHESION	342932
UNIPROT	Popeye domain-containing protein 1	UNSPECIFIC	7.02	343923	UNSPECIFIC	343923
DOI: 10.1002./pmic.200300449	Kendrin	UNSPECIFIC	5.42	376,333.35	UNSPECIFIC	376333
DOI: 10.1002./pmic.200300449	Plectin 1	May be involved not only in the filaments network, but also in the regulation of their dynamics.	5.6	518,472.53	CELL FUNCTION REGULATOR	518473
The Human Protein Atlas	C-type lectin domain family 3 member C	Tetranectin binds to plasminogen and to isolated kringle 4. May be involved in the packaging of molecules destined for exocytosis.	4.55	80,5450.07	CELLULAR ORGANIZATION	805450
The Human Protein Atlas	C-C motif chemokine ligand 3 like 3	Monokine with inflammatory and chemokinetic properties. Binds to CCR1, CCR4 and CCR5. One of the major HIV-suppressive factors produced by CD8+ T-cells.	4.77	10,085.49	INFLAMMATORY	10085.5
The Human Protein Atlas	C-C motif chemokine ligand 3	Chemotactic for lymphocytes and monocytes	4.77	10,160.64	IMMUNOLOGICAL	10160.6
The Human Protein Atlas	Mannosidase alpha class 2B member 2	Catalytic Activity Hydrolysis of terminal, non-reducing alpha-D-mannose residues in alpha-D-mannosides.	6.7	108,083.31	CATALYTIC ACTIVITY	108083
The Human Protein Atlas	C-X-C motif chemokine ligand 5	Involved in neutrophil activation.	9.17	11972.3	ACTIVATOR	11972.3
The Human Protein Atlas	Hypocretin neuropeptide precursor	Neuropeptides that play a significant role in the regulation of food intake and sleep-wakefulness, possibly by coordinating the complex behavioral and physiologic responses of these complementary homeostatic functions.	10.8	13,362.70	CELL FUNCTION REGULATOR	13362.7
The Human Protein Atlas	C-C motif chemokine ligand 21	Inhibits hemopoiesis and stimulates chemotaxis. Chemotactic in vitro for thymocytes and activated T-cells, but not for B-cells, macrophages, or neutrophils.	10.09	13,563.96	INHIBITOR	13564
The Human Protein Atlas	Calcitonin related polypeptide beta	CGRP induces vasodilation. It dilates a variety of vessels including the coronary, cerebral and systemic vasculature. Its abundance in the CNS also points toward a neurotransmitter or neuromodulator role.	10.1	13,705.72	VASO-REGULATORY	13705.7
The Human Protein Atlas	Serum amyloid A4, constitutive	Major acute phase reactant.	9.27	14,806.69	INFLAMMATORY	14806.7
The Human Protein Atlas	Cystatin F	Inhibits papain and cathepsin L but with affinities lower than other cystatins. May play a role in immune regulation through inhibition of a unique target in the hematopoietic system.	8.82	16,454.08	BIOMARKER	16454.1
The Human Protein Atlas	ECRG4 augurin precursor	Probable hormone that may attenuate cell proliferation and induce senescence of oligodendrocyte and neural precursor cells in the central nervous system (By similarity).	8.57	17,183.41	SIGNAL	17183.4
The Human Protein Atlas	Interleukin 36 alpha	Cytokine that binds to and signals through the IL1RL2/IL-36R receptor which in turn activates NF-kappa-B and MAPK signaling pathways in target cells linked to a pro-inflammatory response.	6.28	17,712.47	SIGNAL	17712.5
The Human Protein Atlas	Chorionic gonadotropin subunit beta 8	Beta subunit of the human chorionic gonadotropin (hCG). hCG is a complex glycoprotein composed of two glycosylated subunits alpha and beta which are non-covalently associated.	8.49	17,738.72	CELLULAR ORGANIZATION	17738.7
The Human Protein Atlas	Betacellulin	Growth factor that binds to EGFR, ERBB4 and other EGF receptor family members. Potent mitogen for retinal pigment epithelial cells and vascular smooth muscle cells.	8.53	19,746.11	CELL CYCLE	19746.1
The Human Protein Atlas	Paired immunoglobin like type 2 receptor alpha	Paired receptors consist of highly related activating and inhibitory receptors and are widely involved in the regulation of the immune system.	10.05	19,798.59	INFLAMMATORY	19798.6
The Human Protein Atlas	CD160 molecule	[CD160 antigen]: Receptor on immune cells capable to deliver stimulatory or inhibitory signals that regulate cell activation and differentiation.	6.94	19,809.82	IMMUNOLOGICAL	19809.8
The Human Protein Atlas	Interleukin 22	Cytokine that contributes to the inflammatory response in vivo.	7.65	20011.3	INFLAMMATORY	20011.3
The Human Protein Atlas	Interleukin 32	Cytokine that may play a role in innate and adaptive immune responses. It induces various cytokines such as TNFA/TNF-alpha and IL8. It activates typical cytokine signal pathways of NF-kappa-B and p38 MAPK.	5.34	21,736.72	IMMUNOLOGICAL	21736.7
The Human Protein Atlas	Dipeptidyl peptidase 4	Cell surface glycoprotein receptor involved in the costimulatory signal essential for T-cell receptor (TCR)-mediated T-cell activation	6.07	22,065.94	IMMUNOLOGICAL	22065.9
The Human Protein Atlas	Interferon epsilon	Type I interferon required for maintaining basal levels of IFN-regulated genes, including 2'-5'-oligoadenylate synthetase, IRF7 and ISG15, in the female reproductive tract. Directly mediates protection against viral and bacterial genital infections (By similarity).	8.75	24414.41	ANTIMICROBIAL	24414.4
The Human Protein Atlas	Complement component 4 binding protein beta	Controls the classical pathway of complement activation. It binds as a cofactor to C3b/C4b inactivator (C3bINA), which then hydrolyzes the complement fragment C4b.	5.05	28,357.44	IMMUNOLOGICAL	28357.4
The Human Protein Atlas	Cytochrome b5 domain containing 2	Heme-binding protein which promotes neuronal but not astrocyte differentiation.	8.73	28,689.65	ADHESION	28689.7
The Human Protein Atlas	Asialoglycoprotein receptor 1	Mediates the endocytosis of plasma glycoproteins to which the terminal sialic acid residue on their complex carbohydrate moieties has been removed.	5.28	33,186.03	CELL FUNCTION REGULATOR	33186
The Human Protein Atlas	Complement factor H related 3	Might be involved in complement regulation.	7.72	37,323.26	CELL FUNCTION REGULATOR	37323.3
The Human Protein Atlas	Lipase G, endothelial type	Exerts both phospholipase and triglyceride lipase activities . More active as a phospholipase than a triglyceride lipase	8.18	39,361.99	CATALYTIC ACTIVITY	39362
The Human Protein Atlas	Chromosome 16 open reading frame 89	UNSPECIFIC	6.42	44612.08	UNSPECIFIC	44612.1
The Human Protein Atlas	Bone morphogenetic protein 4	Growth factor of the TGF-beta superfamily that plays essential roles in many developmental processes, including neurogenesis, vascular development, angiogenesis and osteogenesis	8.86	45,886.04	CELL CYCLE	45886
The Human Protein Atlas	Cholesteryl ester transfer protein	Involved in the transfer of neutral lipids, including cholesteryl ester and triglyceride, among lipoprotein particles.	5.3	47,957.27	CARRIER	47957.3
The Human Protein Atlas	C-C motif chemokine ligand 4	Monokine with inflammatory and chemokinetic properties.	9.42	5,493.62	INFLAMMATORY	5493.62
The Human Protein Atlas	C-C motif chemokine ligand 16	Shows chemotactic activity for lymphocytes and monocytes but not neutrophils. Also shows potent myelosuppressive activity, suppresses proliferation of myeloid progenitor cells.	11.83	5718.74	CELL FUNCTION REGULATOR	5718.74
The Human Protein Atlas	COPI coat complex subunit alpha	The coatomer is a cytosolic protein complex that binds to dilysine motifs and reversibly associates with Golgi non-clathrin-coated vesicles, which further mediate biosynthetic protein transport from the ER, via the Golgi up to the trans Golgi network.	9.25	69,664.99	CELL FUNCTION REGULATOR	69665
The Human Protein Atlas	Liver enriched antimicrobial peptide 2	Has an antimicrobial activity.	10.31	8,813.53	ANTIMICROBIAL	8813.53
